# Supplementary material for: Releasing a preprint is associated with more attention and citations for the peer-reviewed article
Source: eLife journal article supplement (doi:10.7554/elife.52646), 2019-12-06
Supplement: supp [file elife-52646-supp-v1.zip]

Archive with 26 entries (26 files):
- elife_poa_e52646_Transparent_Reporting_File.docx
- elife_poa_e52646_Figure_1_figure_supplement_6.pdf
- elife_poa_e52646_Figure_2_figure_supplement_1.pdf
- elife_poa_e52646_Figure_1_figure_supplement_5.pdf
- elife_poa_e52646_Figure_1_figure_supplement_2.pdf
- elife_poa_e52646_Figure_1_figure_supplement_8.pdf
- elife_poa_e52646_Figure_1_figure_supplement_3.pdf
- elife_poa_e52646_Supplementary_file_7.csv
- elife_poa_e52646_Supplementary_file_9.csv
- elife_poa_e52646_Figure_1_figure_supplement_1.pdf
- elife_poa_e52646_Supplementary_file_4.csv
- elife_poa_e52646_Figure_1_figure_supplement_7.pdf
- elife_poa_e52646_Supplementary_file_14.csv
- elife_poa_e52646_Supplementary_file_5.csv
- elife_poa_e52646_Supplementary_file_1.csv
- elife_poa_e52646_Supplementary_file_8.csv
- elife_poa_e52646_Figure_1_figure_supplement_9.pdf
- elife_poa_e52646_Supplementary_file_11.csv
- elife_poa_e52646_Supplementary_file_2.csv
- elife_poa_e52646_Figure_1_figure_supplement_4.pdf
- elife_poa_e52646_Supplementary_file_6.csv
- elife_poa_e52646_Supplementary_file_12.csv
- elife_poa_e52646_Supplementary_file_10.csv
- elife_poa_e52646_Figure_2_figure_supplement_2.pdf
- elife_poa_e52646_Supplementary_file_13.csv
- elife_poa_e52646_Supplementary_file_3.csv
