# Supplementary material for: Releasing a preprint is associated with more attention and citations for the peer-reviewed article
Source: eLife journal article supplement (doi:10.7554/elife.52646), 2019-12-06
Supplement: supp [file elife-52646-supp-v1.zip › elife_poa_e52646_Supplementary_file_3.csv]

Journal	Minimum number of characters in abstract
Cell	700
Cell Rep	700
Cell Syst	700
Curr Biol	700
Genome Biol	500
J Cell Biol	700
Mol Biol Cell	500
Mol Cell	700
Nat Genet	600
Nat Methods	375
Neuron	700
PLoS Biol	400
