# Supplementary material for: Releasing a preprint is associated with more attention and citations for the peer-reviewed article
Source: eLife journal article supplement (doi:10.7554/elife.52646), 2019-12-06
Supplement: supp [file elife-52646-supp-v1.zip › elife_poa_e52646_Supplementary_file_5.csv]

Journal	PC loading position	Term with high loading for PC1	Term with high loading for PC2	Term with high loading for PC3	Term with high loading for PC4	Term with high loading for PC5	Term with high loading for PC6	Term with high loading for PC7	Term with high loading for PC8	Term with high loading for PC9	Term with high loading for PC10	Term with high loading for PC11	Term with high loading for PC12	Term with high loading for PC13	Term with high loading for PC14	Term with high loading for PC15
Am J Hum Genet	top pos 1	Child	Adult	Infant	Animals	Intellectual Disability	Genome-Wide Association Study	Phenotype	Exons	Syndrome	Exome	Infant, Newborn	Cohort Studies	Case-Control Studies	Gene Frequency	Genetic Variation
Am J Hum Genet	top pos 2	Child, Preschool	Middle Aged	Developmental Disabilities	Mice	Developmental Disabilities	Polymorphism, Single Nucleotide	Genetic Association Studies	Genetic Variation	Genetic Predisposition to Disease	Homozygote	Exome	Case-Control Studies	Mutation	Genetic Predisposition to Disease	Mutation, Missense
Am J Hum Genet	top pos 3	Mutation	Young Adult	Child, Preschool	Zebrafish	Sequence Analysis, DNA	Amino Acid Sequence	Models, Genetic	Adolescent	Heterozygote	Gene Expression Regulation	Infant	Exons	Amino Acid Sequence	Heterozygote	Cohort Studies
Am J Hum Genet	top neg 3	Quantitative Trait Loci	Sequence Analysis, DNA	Adult	Genome, Human	Infant, Newborn	High-Throughput Nucleotide Sequencing	Humans	Gene Frequency	Genetic Association Studies	Haplotypes	Humans	Syndrome	Homozygote	Humans	Base Sequence
Am J Hum Genet	top neg 2	Genome-Wide Association Study	Base Sequence	Aged	Genomics	Fibroblasts	Genome, Human	Quantitative Trait Loci	Genome, Human	Animals	Infant, Newborn	Alleles	Gene Expression Regulation	Genes, Recessive	High-Throughput Nucleotide Sequencing	Polymorphism, Single Nucleotide
Am J Hum Genet	top neg 1	Polymorphism, Single Nucleotide	Molecular Sequence Data	Middle Aged	Adult	Mutation	Genomics	Gene Expression Regulation	Syndrome	Fibroblasts	Aged	Haplotypes	Quantitative Trait Loci	Mutation, Missense	Models, Genetic	Gene Frequency
BMC Bioinformatics	top pos 1	High-Throughput Nucleotide Sequencing	Gene Expression Profiling	User-Computer Interface	Humans	Phylogeny	Databases, Genetic	Databases, Factual	ROC Curve	Databases, Factual	Polymorphism, Single Nucleotide	Gene Regulatory Networks	Computational Biology	Sequence Analysis, RNA	Cluster Analysis	Reproducibility of Results
BMC Bioinformatics	top pos 2	Sequence Analysis, DNA	Gene Regulatory Networks	Internet	Neoplasms	Animals	Reproducibility of Results	Software	Polymorphism, Single Nucleotide	Models, Theoretical	Computer Simulation	ROC Curve	Animals	Databases, Genetic	Software	Algorithms
BMC Bioinformatics	top pos 3	Genome, Human	Humans	Transcriptome	Genome, Human	Computer Simulation	ROC Curve	Models, Theoretical	High-Throughput Nucleotide Sequencing	Algorithms	Computational Biology	Software	Reproducibility of Results	Neoplasms	Databases, Genetic	Databases, Factual
BMC Bioinformatics	top neg 3	ROC Curve	Proteins	Genome, Human	Animals	Computational Biology	Gene Regulatory Networks	Neoplasms	Algorithms	Genomics	Neoplasms	Databases, Factual	Gene Regulatory Networks	Computer Simulation	Sequence Alignment	Genomics
BMC Bioinformatics	top neg 2	Databases, Protein	User-Computer Interface	Sequence Analysis, DNA	Phylogeny	Databases, Protein	Genomics	Algorithms	Phylogeny	Neoplasms	Genomics	Computer Simulation	Computer Simulation	Gene Regulatory Networks	Neoplasms	ROC Curve
BMC Bioinformatics	top neg 1	Proteins	Internet	Sequence Alignment	Sequence Analysis, RNA	Proteins	Databases, Factual	Cluster Analysis	Computational Biology	Databases, Genetic	Reproducibility of Results	Cluster Analysis	Sequence Alignment	Genomics	Animals	Models, Theoretical
BMC Genomics	top pos 1	Polymorphism, Single Nucleotide	Humans	Phylogeny	Computational Biology	Animals	Evolution, Molecular	MicroRNAs	MicroRNAs	Genomics	Gene Regulatory Networks	Genetic Variation	Genome	Gene Ontology	Genetic Variation	Databases, Genetic
BMC Genomics	top pos 2	Quantitative Trait Loci	Software	Evolution, Molecular	Software	Genome	Gene Regulatory Networks	RNA, Messenger	RNA, Messenger	Molecular Sequence Annotation	Databases, Genetic	Genome	Gene Regulatory Networks	Sequence Analysis, DNA	Genome, Plant	Genotype
BMC Genomics	top pos 3	Genotype	Algorithms	Plant Proteins	Reproducibility of Results	Molecular Sequence Annotation	Algorithms	Genome, Bacterial	High-Throughput Nucleotide Sequencing	Databases, Genetic	Sequence Analysis, DNA	Gene Regulatory Networks	Transcriptome	Genome	Gene Expression Regulation	Humans
BMC Genomics	top neg 3	Gene Expression Regulation	Genome, Plant	Genome-Wide Association Study	Sequence Analysis, RNA	Plant Proteins	Sequence Analysis, RNA	Mice	Cluster Analysis	Sequence Analysis, DNA	Genotype	Quantitative Trait Loci	Gene Ontology	Genetic Variation	Phylogeny	Gene Regulatory Networks
BMC Genomics	top neg 2	Transcriptome	Plant Proteins	Polymorphism, Single Nucleotide	Mice	Algorithms	Sequence Analysis, DNA	Genome	Gene Expression Profiling	Cluster Analysis	Genome-Wide Association Study	Genomics	Genetic Variation	Databases, Genetic	Mice	Sequence Analysis, RNA
BMC Genomics	top neg 1	Gene Expression Profiling	Gene Expression Regulation, Plant	Quantitative Trait Loci	Animals	Humans	High-Throughput Nucleotide Sequencing	Software	Gene Ontology	Gene Expression Regulation	Reproducibility of Results	Chromosome Mapping	Mice	Sequence Analysis, RNA	Genome, Bacterial	Genetic Variation
Bioinformatics	top pos 1	Sequence Analysis, DNA	Gene Expression Profiling	Computer Simulation	Genome	Models, Biological	Software	Algorithms	Polymorphism, Single Nucleotide	Computer Simulation	Polymorphism, Single Nucleotide	High-Throughput Nucleotide Sequencing	Computational Biology	Models, Biological	Proteins	Sequence Alignment
Bioinformatics	top pos 2	Genomics	Sequence Analysis, RNA	Models, Biological	Internet	Algorithms	Computational Biology	Gene Expression Profiling	Computer Simulation	Internet	Algorithms	Internet	Sequence Analysis, Protein	Sequence Analysis, Protein	Software	Humans
Bioinformatics	top pos 3	High-Throughput Nucleotide Sequencing	Humans	Humans	Genomics	Computer Simulation	Models, Biological	Sequence Analysis, RNA	Software	Gene Expression Profiling	Genomics	Polymorphism, Single Nucleotide	Genome	High-Throughput Nucleotide Sequencing	Algorithms	Genome
Bioinformatics	top neg 3	Sequence Analysis, Protein	Proteins	Sequence Alignment	Genome, Human	Humans	Algorithms	Computational Biology	Computational Biology	Computational Biology	Animals	Genome, Human	Animals	Software	Animals	Genomics
Bioinformatics	top neg 2	Computational Biology	Sequence Alignment	Software	Sequence Alignment	Internet	Genome	Humans	Genome, Human	Animals	Computer Simulation	Software	Internet	Computer Simulation	Sequence Analysis, Protein	Algorithms
Bioinformatics	top neg 1	Proteins	Sequence Analysis, Protein	Sequence Analysis, RNA	Algorithms	Polymorphism, Single Nucleotide	Animals	Animals	Internet	Software	High-Throughput Nucleotide Sequencing	Genomics	Algorithms	Computational Biology	Sequence Alignment	Sequence Analysis, Protein
Biophys J	top pos 1	Amino Acid Sequence	Models, Molecular	Diffusion	Lipid Bilayers	Computer Simulation	Protein Conformation	Cell Membrane	Elasticity	Humans	Calcium	Diffusion	Escherichia coli	Protein Multimerization	Thermodynamics	Thermodynamics
Biophys J	top pos 2	Molecular Sequence Data	Kinetics	Lipid Bilayers	Molecular Dynamics Simulation	Models, Biological	Models, Molecular	Models, Molecular	Protein Conformation	Calcium	Escherichia coli	Humans	Protein Multimerization	Models, Molecular	Cell Membrane	Computer Simulation
Biophys J	top pos 3	Protein Binding	Escherichia coli	Molecular Sequence Data	Mechanical Phenomena	Molecular Sequence Data	Thermodynamics	Diffusion	Escherichia coli	Protein Multimerization	Mechanical Phenomena	Mice	Elasticity	Protein Binding	Mutation	Lipid Bilayers
Biophys J	top neg 3	Mechanical Phenomena	Amino Acid Sequence	Models, Molecular	Calcium	Protein Conformation	Mutation	Mutation	Thermodynamics	Mice	Humans	Thermodynamics	Protein Binding	Lipid Bilayers	Protein Binding	Elasticity
Biophys J	top neg 2	Biomechanical Phenomena	Biomechanical Phenomena	Biomechanical Phenomena	Mice	Lipid Bilayers	Escherichia coli	Thermodynamics	Protein Multimerization	Escherichia coli	Cell Membrane	Lipid Bilayers	Molecular Dynamics Simulation	Mutation	Kinetics	Cell Membrane
Biophys J	top neg 1	Models, Biological	Molecular Sequence Data	Mechanical Phenomena	Animals	Mice	Protein Domains	Molecular Dynamics Simulation	Kinetics	Diffusion	Elasticity	Calcium	Protein Domains	Humans	Protein Multimerization	Kinetics
Cell	top pos 1	Amino Acid Sequence	Saccharomyces cerevisiae	Humans	HEK293 Cells	Cell Line	Saccharomyces cerevisiae	Saccharomyces cerevisiae	HEK293 Cells	Signal Transduction	Models, Molecular	Cell Line, Tumor	Transcription Factors	Models, Molecular	Mice, Inbred C57BL	Humans
Cell	top pos 2	Sequence Alignment	Humans	Cell Line, Tumor	Neurons	Signal Transduction	Transcription, Genetic	Transcriptome	Transcription Factors	Cell Line, Tumor	Cell Line, Tumor	Neurons	Saccharomyces cerevisiae	Neurons	Humans	Saccharomyces cerevisiae
Cell	top pos 3	Molecular Sequence Data	Mutation	HEK293 Cells	Mutation	HEK293 Cells	Mice	Mice, Inbred C57BL	Saccharomyces cerevisiae	Saccharomyces cerevisiae	Transcription Factors	Transcription, Genetic	Cell Line	Mice, Inbred C57BL	Transcription, Genetic	Mice
Cell	top neg 3	Mice, Inbred C57BL	Mice, Inbred C57BL	Models, Molecular	Cell Line	Cell Line, Tumor	Transcription Factors	Transcription Factors	Signal Transduction	HEK293 Cells	HEK293 Cells	Models, Molecular	Transcriptome	Animals	HEK293 Cells	Cell Line, Tumor
Cell	top neg 2	Animals	Mice	Neurons	Transcription Factors	Transcriptome	Signal Transduction	Mutation	Cell Line	Transcriptome	Mutation	HEK293 Cells	Models, Molecular	Sequence Alignment	Models, Molecular	HEK293 Cells
Cell	top neg 1	Mice	Animals	Saccharomyces cerevisiae	Transcription, Genetic	Mutation	Transcriptome	Neurons	Mutation	Cell Line	Saccharomyces cerevisiae	Transcription Factors	Transcription, Genetic	Molecular Sequence Data	Animals	Mice, Inbred C57BL
Cell Rep	top pos 1	Humans	Signal Transduction	Transcription, Genetic	Gene Expression Regulation	Phosphorylation	Neurons	Mice, Knockout	Mice, Transgenic	Transcription Factors	Protein Binding	Transcription, Genetic	Phosphorylation	Transcription, Genetic	Mice, Inbred C57BL	Mice
Cell Rep	top pos 2	Cell Line, Tumor	Cell Line, Tumor	Cell Differentiation	Protein Binding	Signal Transduction	Cell Differentiation	Mutation	Neurons	Phosphorylation	Cells, Cultured	Cell Proliferation	Mutation	Cells, Cultured	Cell Differentiation	HEK293 Cells
Cell Rep	top pos 3	HEK293 Cells	Humans	Cell Proliferation	Transcription, Genetic	Cell Line, Tumor	Cells, Cultured	Neurons	HEK293 Cells	Cells, Cultured	Mice, Knockout	Neurons	Cell Line	Mice, Inbred C57BL	Mice, Knockout	Animals
Cell Rep	top neg 3	Mice, Inbred C57BL	Cells, Cultured	Mice, Knockout	Cells, Cultured	Cell Differentiation	Mice, Transgenic	Phosphorylation	Gene Expression Regulation	Gene Expression Regulation	Mutation	Transcription Factors	Humans	Neurons	Protein Binding	Cell Line, Tumor
Cell Rep	top neg 2	Mice	Mutation	Phosphorylation	Cell Proliferation	Cell Line	Protein Binding	Cell Line	Mice, Knockout	Cell Proliferation	Cell Line	Signal Transduction	Cell Line, Tumor	Protein Binding	Mice	Neurons
Cell Rep	top neg 1	Animals	Neurons	HEK293 Cells	Cell Line, Tumor	Cells, Cultured	Transcription Factors	Mice, Transgenic	Cell Line	Mutation	Neurons	Mutation	Gene Expression Regulation	Cell Proliferation	Cells, Cultured	Mice, Inbred C57BL
Development	top pos 1	Drosophila Proteins	Zebrafish	Arabidopsis	Immunohistochemistry	Neural Stem Cells	Cell Polarity	Signal Transduction	Stem Cells	Hedgehog Proteins	Mutation	Cell Proliferation	Apoptosis	Cell Movement	Protein Binding	Models, Biological
Development	top pos 2	Drosophila melanogaster	Zebrafish Proteins	Humans	Drosophila	Neurogenesis	Mice, Inbred C57BL	Hedgehog Proteins	Cell Differentiation	Homeodomain Proteins	Phenotype	Drosophila	Protein Binding	Cell Polarity	Cell Polarity	Nerve Tissue Proteins
Development	top pos 3	Animals, Genetically Modified	In Situ Hybridization	Gene Expression Profiling	In Situ Hybridization	Neurons	Mice, Knockout	Stem Cells	Cell Proliferation	Organogenesis	In Situ Hybridization	Apoptosis	Mice, Knockout	Stem Cells	Organogenesis	Embryonic Development
Development	top neg 3	Mice, Knockout	DNA-Binding Proteins	Drosophila melanogaster	Transcription Factors	Morphogenesis	Transcription Factors	Gene Expression Regulation, Developmental	Mesoderm	Cell Lineage	Embryo, Nonmammalian	Drosophila melanogaster	Drosophila melanogaster	Cells, Cultured	Embryonic Development	Cell Movement
Development	top neg 2	Mice, Inbred C57BL	Drosophila melanogaster	Drosophila Proteins	Mutation	In Situ Hybridization	Immunohistochemistry	DNA-Binding Proteins	Morphogenesis	Embryonic Development	Mesoderm	Cells, Cultured	Mutation	Animals, Genetically Modified	Mice, Knockout	Animals, Genetically Modified
Development	top neg 1	Mice	Drosophila Proteins	Animals	Gene Expression Regulation, Developmental	Embryonic Development	In Situ Hybridization	Transcription Factors	Neurons	Gene Expression Profiling	Body Patterning	Humans	Mice, Transgenic	Hedgehog Proteins	Pregnancy	Cells, Cultured
Elife	top pos 1	Animals	Saccharomyces cerevisiae	Saccharomyces cerevisiae	Signal Transduction	Mice, Inbred C57BL	Mice	Neurons	Cell Line	Signal Transduction	Protein Binding	Humans	Models, Molecular	Animals
Elife	top pos 2	Mice	Humans	Neurons	Saccharomyces cerevisiae	Mice	Saccharomyces cerevisiae	Saccharomyces cerevisiae	Mice, Inbred C57BL	Neurons	Humans	Drosophila	Animals	Humans
Elife	top pos 3	Neurons	Cell Line	Drosophila	Gene Expression Regulation	Saccharomyces cerevisiae	Protein Binding	Protein Binding	Protein Binding	Humans	Mice, Inbred C57BL	Mice	Humans	Saccharomyces cerevisiae
Elife	top neg 3	Protein Binding	Animals	Gene Expression Regulation	Cell Line	Gene Expression Regulation	Humans	Protein Conformation	Humans	Animals	Saccharomyces cerevisiae	Gene Expression Regulation	Drosophila	Mice, Inbred C57BL
Elife	top neg 2	Protein Conformation	Protein Conformation	Humans	Humans	Cell Line	Drosophila	Mice	Neurons	Mice, Inbred C57BL	Protein Conformation	Protein Binding	Mice	Drosophila
Elife	top neg 1	Models, Molecular	Models, Molecular	Cell Line	Neurons	Drosophila	Mice, Inbred C57BL	Signal Transduction	Gene Expression Regulation	Gene Expression Regulation	Cell Line	Cell Line	Protein Conformation	Mice
Evolution	top pos 1	Genetic Fitness	Biological Evolution	Phylogeny	Evolution, Molecular	Phenotype	Models, Genetic	Genetic Variation	Genetic Variation	Genotype	Drosophila melanogaster	Mating Preference, Animal	Environment	Genetic Variation	Sexual Behavior, Animal	Selection, Genetic
Evolution	top pos 2	Selection, Genetic	Animals	Biological Evolution	Animals	Environment	Body Size	Reproduction	Genotype	Mating Preference, Animal	Environment	Genetic Fitness	Reproduction	Gene Flow	Genetic Speciation	Phenotype
Evolution	top pos 3	Mutation	Phylogeny	Ecosystem	Genetic Variation	Ecosystem	Phenotype	Genotype	Environment	Adaptation, Biological	Models, Genetic	Drosophila melanogaster	Sexual Behavior, Animal	Sexual Behavior, Animal	Mutation	Hybridization, Genetic
Evolution	top neg 3	Genetic Speciation	Mutation	Mating Preference, Animal	Genotype	Sexual Behavior, Animal	Adaptation, Biological	Adaptation, Physiological	Body Size	Environment	Mutation	Sexual Behavior, Animal	Biological Evolution	Drosophila melanogaster	Mating Preference, Animal	Adaptation, Physiological
Evolution	top neg 2	Hybridization, Genetic	Evolution, Molecular	Reproduction	Adaptation, Biological	Evolution, Molecular	Adaptation, Physiological	Selection, Genetic	Ecosystem	Adaptation, Physiological	Adaptation, Physiological	Evolution, Molecular	Hybridization, Genetic	Genetic Fitness	Evolution, Molecular	Mating Preference, Animal
Evolution	top neg 1	Reproductive Isolation	Models, Genetic	Sexual Behavior, Animal	Biological Evolution	Mutation	Drosophila melanogaster	Mating Preference, Animal	Adaptation, Biological	Reproduction	Ecosystem	Body Size	Body Size	Genotype	Reproduction	Body Size
G3 (Bethesda)	top pos 1	Polymorphism, Single Nucleotide	Saccharomyces cerevisiae Proteins	Animals	Drosophila Proteins	Chromosome Mapping	Gene Expression Profiling	Humans	Transcriptome	Polymorphism, Single Nucleotide	Genome	Genetic Variation	Genetic Variation	Transcription Factors	Humans	Transcription Factors
G3 (Bethesda)	top pos 2	Quantitative Trait Loci	Phenotype	Caenorhabditis elegans	Drosophila melanogaster	Quantitative Trait Loci	Transcriptome	Mice	Gene Expression Profiling	Drosophila melanogaster	Genetic Linkage	Phenotype	Drosophila melanogaster	Drosophila	Genetic Linkage	Sequence Analysis, DNA
G3 (Bethesda)	top pos 3	Genotype	Quantitative Trait, Heritable	Caenorhabditis elegans Proteins	Drosophila	Genetic Linkage	Reproducibility of Results	Genome-Wide Association Study	Quantitative Trait Loci	Genome-Wide Association Study	Animals	Drosophila	Alleles	Alleles	Genetics, Population	Gene Expression Regulation, Fungal
G3 (Bethesda)	top neg 3	Saccharomyces cerevisiae	Transcriptome	Gene Expression Regulation, Fungal	Chromosome Mapping	Algorithms	Genome	Phylogeny	Genomics	Mice	Sequence Analysis, DNA	Base Sequence	Genomics	Genetic Association Studies	Genome, Plant	Drosophila
G3 (Bethesda)	top neg 2	Mutation	Molecular Sequence Annotation	Saccharomyces cerevisiae Proteins	Caenorhabditis elegans Proteins	Selection, Genetic	Sequence Analysis, DNA	Evolution, Molecular	Mutation	Gene Expression	Genome, Plant	Alleles	Humans	Genetic Variation	Mice	Genetic Loci
G3 (Bethesda)	top neg 1	Saccharomyces cerevisiae Proteins	Computational Biology	Saccharomyces cerevisiae	Caenorhabditis elegans	Models, Genetic	Base Sequence	Genome, Plant	Genetic Variation	Base Sequence	Alleles	Genetic Loci	Drosophila	Drosophila melanogaster	Genome-Wide Association Study	Selection, Genetic
Genetics	top pos 1	Caenorhabditis elegans Proteins	Animals	Drosophila Proteins	Selection, Genetic	Mice	Phenotype	Phenotype	Drosophila	Mice	Transcription Factors	Mice	Mutation	Chromosome Mapping	Alleles	Drosophila melanogaster
Genetics	top pos 2	Caenorhabditis elegans	Drosophila Proteins	Drosophila melanogaster	Evolution, Molecular	Recombination, Genetic	Mutation	Drosophila	DNA-Binding Proteins	Chromosome Mapping	DNA-Binding Proteins	Alleles	Recombination, Genetic	Genetics, Population	Genetic Variation	Protein Binding
Genetics	top pos 3	Animals	Caenorhabditis elegans	Drosophila	Models, Genetic	Meiosis	Alleles	Mutation	Transcription Factors	Quantitative Trait Loci	Evolution, Molecular	Mutation	Transcription Factors	Genomics	Genotype	Mutation
Genetics	top neg 3	Computer Simulation	Protein Binding	Meiosis	Genome-Wide Association Study	Humans	Polymorphism, Single Nucleotide	Computer Simulation	Signal Transduction	Recombination, Genetic	Drosophila	Phenotype	Animals	Mice	Genome-Wide Association Study	Transcription Factors
Genetics	top neg 2	Algorithms	Saccharomyces cerevisiae Proteins	Caenorhabditis elegans Proteins	Chromosome Mapping	Algorithms	Genome-Wide Association Study	Meiosis	Gene Expression Regulation, Developmental	Polymorphism, Single Nucleotide	Computer Simulation	Genetic Variation	Protein Binding	Gene Expression Regulation, Developmental	Signal Transduction	Drosophila
Genetics	top neg 1	Models, Genetic	Saccharomyces cerevisiae	Caenorhabditis elegans	Quantitative Trait Loci	Genome-Wide Association Study	Humans	Recombination, Genetic	Drosophila melanogaster	Meiosis	Algorithms	Genomics	Genomics	Genetic Variation	Evolution, Molecular	Signal Transduction
Genome Biol	top pos 1	Sequence Analysis, RNA	Animals	Epigenesis, Genetic	CpG Islands	DNA Methylation	Mutation	Sequence Analysis, DNA	Animals	Mice	Transcription Factors	Genome, Human	Histones	Mutation	Base Sequence	Genetic Variation
Genome Biol	top pos 2	Single-Cell Analysis	Mice	DNA Methylation	DNA Methylation	CpG Islands	CRISPR-Cas Systems	Animals	Genome	Gene Regulatory Networks	Base Sequence	Evolution, Molecular	Genome, Plant	Histones	RNA	Genomics
Genome Biol	top pos 3	Gene Expression Profiling	Chromatin	CpG Islands	Genome-Wide Association Study	Epigenesis, Genetic	Genome, Human	Mice	Neoplasms	Phenotype	Sequence Analysis, DNA	Sequence Analysis, RNA	Neoplasms	RNA, Messenger	Evolution, Molecular	Promoter Regions, Genetic
Genome Biol	top neg 3	Genome, Human	Software	Genome, Plant	Cell Line	Gene Expression Regulation	Cluster Analysis	Transcriptome	Sequence Analysis, RNA	Transcription, Genetic	Phylogeny	Reproducibility of Results	Gene Expression Regulation	CRISPR-Cas Systems	Genomics	Evolution, Molecular
Genome Biol	top neg 2	Epigenesis, Genetic	Algorithms	Evolution, Molecular	Mutation	Genome-Wide Association Study	Gene Regulatory Networks	Gene Regulatory Networks	Chromatin	Gene Expression Regulation	Humans	Cluster Analysis	Genome-Wide Association Study	Promoter Regions, Genetic	Reproducibility of Results	Base Sequence
Genome Biol	top neg 1	DNA Methylation	Computational Biology	Phylogeny	Chromatin	Polymorphism, Single Nucleotide	Genomics	Gene Expression Regulation, Neoplastic	Histones	RNA, Messenger	Genomics	CRISPR-Cas Systems	Gene Regulatory Networks	Cell Line	Sequence Analysis, DNA	Humans
Genome Biol Evol	top pos 1	Genome, Bacterial	Evolution, Molecular	Genome, Plant	Genome, Insect	Transcriptome	Models, Genetic	Biological Evolution	Genomics	Models, Genetic	Base Sequence	Polymorphism, Genetic	Sequence Analysis, DNA	Mutation	Base Sequence	Humans
Genome Biol Evol	top pos 2	Phylogeny	Gene Duplication	Mutation	Genome, Mitochondrial	Gene Duplication	Evolution, Molecular	Gene Duplication	DNA Transposable Elements	Genome, Mitochondrial	Genome	Biological Evolution	Selection, Genetic	Polymorphism, Single Nucleotide	Genetic Variation	Sequence Analysis, DNA
Genome Biol Evol	top pos 3	Gene Transfer, Horizontal	Genome, Plant	Genetic Variation	DNA Transposable Elements	Biological Evolution	Selection, Genetic	DNA Transposable Elements	Polymorphism, Genetic	Transcriptome	Transcriptome	Genomics	Polymorphism, Single Nucleotide	Genome, Mitochondrial	Symbiosis	DNA Transposable Elements
Genome Biol Evol	top neg 3	Animals	Biological Evolution	Symbiosis	Genome	Models, Genetic	Genome	Evolution, Molecular	Phylogeny	Gene Transfer, Horizontal	Genome, Mitochondrial	Genetic Variation	Genetic Variation	Models, Genetic	Biological Evolution	Mutation
Genome Biol Evol	top neg 2	Polymorphism, Single Nucleotide	Symbiosis	Genome	Polymorphism, Single Nucleotide	Sequence Analysis, DNA	Genetic Variation	Transcriptome	Models, Genetic	Multigene Family	Multigene Family	Genome, Insect	Genomics	Polymorphism, Genetic	Genome	Gene Transfer, Horizontal
Genome Biol Evol	top neg 1	Selection, Genetic	Genome, Bacterial	Animals	Humans	Polymorphism, Genetic	Base Sequence	Genome, Mitochondrial	Biological Evolution	Humans	Genome, Insect	Polymorphism, Single Nucleotide	Mutation	Genetic Variation	DNA Transposable Elements	Genome
Genome Res	top pos 1	Humans	Animals	Gene Expression Profiling	Saccharomyces cerevisiae	Saccharomyces cerevisiae	Gene Expression Regulation	Cell Line, Tumor	High-Throughput Nucleotide Sequencing	Cell Line	Algorithms	DNA Methylation	Genetic Variation	Enhancer Elements, Genetic	Cell Line	Enhancer Elements, Genetic
Genome Res	top pos 2	Genome, Human	Evolution, Molecular	Gene Expression Regulation	RNA, Messenger	Binding Sites	Evolution, Molecular	Phylogeny	Computational Biology	RNA, Messenger	Mice	Transcriptome	Gene Expression Regulation, Developmental	Software	Protein Binding	Evolution, Molecular
Genome Res	top pos 3	Software	Phylogeny	Transcriptome	Sequence Analysis, RNA	Transcription Factors	Humans	Evolution, Molecular	Epigenesis, Genetic	Transcription, Genetic	Mutation	Gene Expression Profiling	Genomics	Transcriptome	Algorithms	Gene Expression Regulation, Developmental
Genome Res	top neg 3	Promoter Regions, Genetic	Protein Binding	Histones	Animals	Cell Line, Tumor	Algorithms	Polymorphism, Single Nucleotide	Enhancer Elements, Genetic	Gene Expression Regulation, Developmental	Sequence Analysis, DNA	Sequence Analysis, RNA	Software	Sequence Analysis, RNA	Polymorphism, Single Nucleotide	Gene Expression Profiling
Genome Res	top neg 2	Mice	Humans	Epigenesis, Genetic	Genome	DNA Methylation	Gene Expression Regulation, Developmental	Mutation	Humans	Transcriptome	Gene Expression Regulation, Developmental	Transcription, Genetic	Phylogeny	Polymorphism, Single Nucleotide	Sequence Analysis, DNA	Protein Binding
Genome Res	top neg 1	Chromatin	Genome, Human	DNA Methylation	Genomics	Epigenesis, Genetic	Software	Cell Line	Algorithms	Mutation	Sequence Analysis, RNA	Cell Line, Tumor	Mutation	Algorithms	Promoter Regions, Genetic	Cell Line, Tumor
Gigascience	top pos 1	Molecular Sequence Annotation	Gene Expression Profiling	Genome, Plant	Genome, Plant	Computational Biology	Genome, Human	Gene Expression Profiling	Bacteria	Species Specificity	Algorithms	Bacteria	Evolution, Molecular	Sequence Analysis, RNA	Bacteria	Genome Size
Gigascience	top pos 2	Animals	Sequence Analysis, RNA	Sequence Analysis, RNA	Genome Size	Phenotype	Polymorphism, Single Nucleotide	Molecular Sequence Annotation	Species Specificity	Whole Genome Sequencing	Phenotype	Phenotype	Phylogeny	Polymorphism, Single Nucleotide	Databases, Genetic	Reproducibility of Results
Gigascience	top pos 3	Genome	Transcriptome	Transcriptome	High-Throughput Nucleotide Sequencing	Software	Whole Genome Sequencing	Contig Mapping	Polymorphism, Single Nucleotide	Bacteria	Chromosome Mapping	Whole Genome Sequencing	Algorithms	Bacteria	Sequence Analysis, DNA	Humans
Gigascience	top neg 3	Reproducibility of Results	Genome Size	Computational Biology	Species Specificity	Genome, Human	Sequence Analysis, DNA	Bacteria	Whole Genome Sequencing	Genome, Plant	Databases, Genetic	Species Specificity	Phenotype	Phenotype	Genomics	Databases, Genetic
Gigascience	top neg 2	Software	Genome, Plant	Genome	Genome	Bacteria	Reproducibility of Results	Databases, Genetic	Software	Polymorphism, Single Nucleotide	Genome, Human	Evolution, Molecular	Sequence Analysis, DNA	Genome Size	High-Throughput Nucleotide Sequencing	Species Specificity
Gigascience	top neg 1	Humans	Whole Genome Sequencing	Genomics	Animals	Sequence Analysis, DNA	Bacteria	Chromosome Mapping	Genome	Phenotype	Genomics	Polymorphism, Single Nucleotide	Reproducibility of Results	Evolution, Molecular	Chromosome Mapping	Contig Mapping
ISME J	top pos 1	Soil Microbiology	Animals	Phytoplankton	Biodiversity	Humans	Carbon	Metagenome	Symbiosis	Seawater	Biological Evolution	Water Microbiology	RNA, Ribosomal, 16S	Geologic Sediments	Phytoplankton	Bacteria
ISME J	top pos 2	Soil	Gastrointestinal Microbiome	Nitrogen	Water Microbiology	Carbon	Nitrogen	Metagenomics	Microbiota	Phylogeny	Ecology	Genomics	Geologic Sediments	Ecology	Sequence Analysis, DNA	Ecology
ISME J	top pos 3	Fungi	Humans	Oceans and Seas	Oceans and Seas	Oxidation-Reduction	Animals	Genome, Bacterial	Metagenome	Oceans and Seas	Metagenomics	Microbiota	Biological Evolution	Metagenome	Metagenome	Bacterial Proteins
ISME J	top neg 3	Humans	Geologic Sediments	Gastrointestinal Microbiome	Genomics	Genome, Bacterial	Water Microbiology	Archaea	Ecosystem	Carbon	Seawater	Metagenomics	Metagenomics	Phylogeny	Fungi	Ecosystem
ISME J	top neg 2	Gastrointestinal Microbiome	Oxidation-Reduction	RNA, Ribosomal, 16S	Oxidation-Reduction	Genomics	Biodiversity	Methane	Humans	Genome, Bacterial	Sequence Analysis, DNA	Bacterial Proteins	Biodiversity	Biological Evolution	Humans	Metagenomics
ISME J	top neg 1	Animals	Archaea	Bacteria	Bacterial Proteins	Biological Evolution	Bacterial Proteins	Oxidation-Reduction	Gastrointestinal Microbiome	Water Microbiology	Oceans and Seas	Ecosystem	Sequence Analysis, DNA	Bacteria	Genomics	Water Microbiology
J Biol Chem	top pos 1	Models, Molecular	Humans	Humans	Amino Acid Substitution	Rats	Signal Transduction	Cells, Cultured	Humans	Cell Line, Tumor	HeLa Cells	Cells, Cultured	Gene Expression Regulation	Phosphorylation	Protein Transport	Protein Structure, Tertiary
J Biol Chem	top pos 2	Crystallography, X-Ray	HeLa Cells	HEK293 Cells	Recombinant Proteins	Recombinant Proteins	Phosphorylation	Amino Acid Sequence	Mice	Rats	Rats	Rats	Rats	Protein Domains	Phosphorylation	Phosphorylation
J Biol Chem	top pos 3	Protein Conformation	Cell Line, Tumor	Molecular Sequence Data	Mutation	Molecular Sequence Data	Cell Line, Tumor	HeLa Cells	Cell Line, Tumor	Protein Conformation	Kinetics	Protein Structure, Tertiary	HeLa Cells	Amino Acid Substitution	Mice, Knockout	Crystallography, X-Ray
J Biol Chem	top neg 3	Mice, Knockout	Molecular Sequence Data	Protein Domains	Protein Structure, Tertiary	Protein Binding	Cell Line	Cell Line	Protein Transport	Bacterial Proteins	Cell Line, Tumor	Signal Transduction	Cell Line	Cell Line, Tumor	Gene Expression Regulation	Binding Sites
J Biol Chem	top neg 2	Mice	Mice	Crystallography, X-Ray	Amino Acid Sequence	Protein Domains	Rats	Binding Sites	Rats	Protein Structure, Tertiary	Protein Domains	Phosphorylation	Protein Transport	Protein Multimerization	Cell Line	Protein Domains
J Biol Chem	top neg 1	Animals	Animals	Bacterial Proteins	Molecular Sequence Data	Crystallography, X-Ray	Protein Domains	Protein Binding	Phosphorylation	HeLa Cells	Protein Multimerization	Cell Line	Cells, Cultured	Protein Transport	Cells, Cultured	Kinetics
J Cell Biol	top pos 1	Transfection	Humans	Animals	Saccharomyces cerevisiae Proteins	Drosophila melanogaster	Endosomes	Microtubules	Epithelial Cells	Adaptor Proteins, Signal Transducing	Cell Line	Actins	Transfection	Epithelial Cells	Transfection	Cell Membrane
J Cell Biol	top pos 2	RNA Interference	HeLa Cells	Mice	Saccharomyces cerevisiae	Drosophila Proteins	Lysosomes	Endosomes	Signal Transduction	Nuclear Proteins	Epithelial Cells	Lysosomes	Cell Membrane	Membrane Proteins	Time Factors	RNA, Small Interfering
J Cell Biol	top pos 3	Signal Transduction	Cell Line, Tumor	Mice, Inbred C57BL	Endoplasmic Reticulum	Endoplasmic Reticulum	Protein Transport	Microscopy, Fluorescence	Cell Cycle Proteins	Carrier Proteins	Mitochondria	Cell Line, Tumor	RNA Interference	Cell Membrane	HeLa Cells	Carrier Proteins
J Cell Biol	top neg 3	Spindle Apparatus	Mutation	HeLa Cells	Spindle Apparatus	Nuclear Proteins	Actins	Phosphorylation	RNA Interference	Endoplasmic Reticulum	Phosphorylation	Cell Proliferation	Genotype	Mitochondria	Protein Binding	Mice, Knockout
J Cell Biol	top neg 2	Saccharomyces cerevisiae Proteins	Phenotype	Time Factors	Drosophila melanogaster	Mice, Inbred C57BL	Cell Adhesion	Protein-Serine-Threonine Kinases	Cells, Cultured	Protein-Serine-Threonine Kinases	Protein Transport	Cell Nucleus	Phenotype	Cell Nucleus	Cell Membrane	Adaptor Proteins, Signal Transducing
J Cell Biol	top neg 1	Saccharomyces cerevisiae	Genotype	Protein Binding	Drosophila Proteins	Mice, Knockout	Cell Movement	RNA, Small Interfering	RNA, Small Interfering	Phosphorylation	Cells, Cultured	Models, Biological	Cell Proliferation	Cell Line	Protein Transport	Cell Adhesion
J Neurophysiol	top pos 1	Humans	Muscle, Skeletal	Macaca mulatta	Mice	Electric Stimulation	Middle Aged	Biomechanical Phenomena	Visual Cortex	Biomechanical Phenomena	Adaptation, Physiological	Movement	Hand	Time Factors	Time Factors	Middle Aged
J Neurophysiol	top pos 2	Adult	Electromyography	Motor Cortex	Mice, Inbred C57BL	Analysis of Variance	Brain Mapping	Models, Neurological	Photic Stimulation	Hand	Visual Cortex	Brain Mapping	Visual Perception	Middle Aged	Neural Inhibition	Hand
J Neurophysiol	top pos 3	Young Adult	Evoked Potentials, Motor	Electromyography	Muscle, Skeletal	Photic Stimulation	Visual Cortex	Motor Activity	Mice, Inbred C57BL	Electroencephalography	Neural Inhibition	Visual Cortex	Patch-Clamp Techniques	Neural Inhibition	Models, Neurological	Visual Cortex
J Neurophysiol	top neg 3	Action Potentials	Saccades	Brain	Analysis of Variance	Psychomotor Performance	Mice	Brain Mapping	Patch-Clamp Techniques	Motor Neurons	Brain	Middle Aged	Adolescent	Models, Neurological	Patch-Clamp Techniques	Neural Inhibition
J Neurophysiol	top neg 2	Neurons	Visual Perception	Mice, Inbred C57BL	Rats, Sprague-Dawley	Biomechanical Phenomena	Analysis of Variance	Neural Inhibition	Neurons	Reaction Time	Motor Activity	Neural Inhibition	Adaptation, Physiological	Action Potentials	Brain Mapping	Adaptation, Physiological
J Neurophysiol	top neg 1	Animals	Photic Stimulation	Mice	Rats	Hand	Psychomotor Performance	Motor Cortex	Models, Neurological	Saccades	Electroencephalography	Motor Activity	Electroencephalography	Motor Neurons	Adaptation, Physiological	Brain
J Neurosci	top pos 1	Animals	Mice	Visual Cortex	Signal Transduction	Neurons	Visual Perception	Psychomotor Performance	Nerve Net	Brain	Brain	In Vitro Techniques	Synaptic Transmission	Cerebral Cortex	Cells, Cultured	Models, Neurological
J Neurosci	top pos 2	Mice	Mice, Inbred C57BL	Photic Stimulation	Mice, Knockout	Animals, Newborn	Synapses	Reaction Time	Models, Neurological	In Vitro Techniques	Time Factors	Mice, Knockout	Nerve Tissue Proteins	Signal Transduction	Adolescent	Brain
J Neurosci	top pos 3	Mice, Inbred C57BL	Mice, Transgenic	Visual Perception	Psychomotor Performance	Photic Stimulation	Excitatory Postsynaptic Potentials	Prefrontal Cortex	Visual Perception	Disease Models, Animal	Neurons	Excitatory Postsynaptic Potentials	Cells, Cultured	Time Factors	Synaptic Transmission	Neuronal Plasticity
J Neurosci	top neg 3	Humans	Action Potentials	Cells, Cultured	Synapses	Synapses	Cerebral Cortex	Brain Mapping	Image Processing, Computer-Assisted	Cells, Cultured	Animals, Newborn	Time Factors	Mice, Knockout	Middle Aged	Nerve Tissue Proteins	Nerve Tissue Proteins
J Neurosci	top neg 2	Young Adult	Rats, Sprague-Dawley	Rats	Excitatory Postsynaptic Potentials	Synaptic Transmission	Image Processing, Computer-Assisted	Visual Cortex	Reaction Time	Hippocampus	Neural Pathways	Disease Models, Animal	Hippocampus	Prefrontal Cortex	Middle Aged	Middle Aged
J Neurosci	top neg 1	Adult	Rats	Rats, Sprague-Dawley	In Vitro Techniques	Neuronal Plasticity	Neural Pathways	Image Processing, Computer-Assisted	Prefrontal Cortex	Cerebral Cortex	Prefrontal Cortex	Neuronal Plasticity	Time Factors	Hippocampus	Signal Transduction	Time Factors
J Virol	top pos 1	HIV-1	Humans	Cercopithecus aethiops	Models, Molecular	Genome, Viral	Molecular Sequence Data	Virus Internalization	Virus Internalization	Cell Line	Protein Binding	Viral Proteins	Cells, Cultured	Immunity, Innate	DNA, Viral	Gene Expression Regulation, Viral
J Virol	top pos 2	HIV Infections	Virus Replication	Vero Cells	Amino Acid Sequence	Cercopithecus aethiops	Phylogeny	Cell Line, Tumor	Molecular Sequence Data	Viral Envelope Proteins	Gene Expression Regulation, Viral	DNA, Viral	Mutation	Signal Transduction	Cell Line, Tumor	DNA, Viral
J Virol	top pos 3	CD4-Positive T-Lymphocytes	HEK293 Cells	HIV-1	Capsid Proteins	Vero Cells	Amino Acid Sequence	Phylogeny	Cell Line	Virus Internalization	Cercopithecus aethiops	Viral Load	Cell Line, Tumor	Cells, Cultured	Models, Molecular	Mice
J Virol	top neg 3	Vero Cells	Disease Models, Animal	RNA, Viral	Signal Transduction	Models, Molecular	Capsid Proteins	Viral Load	Cell Line, Tumor	Immunity, Innate	Virus Assembly	Cells, Cultured	HIV-1	HeLa Cells	Amino Acid Sequence	Host-Pathogen Interactions
J Virol	top neg 2	Cercopithecus aethiops	Antibodies, Neutralizing	Phylogeny	Host-Pathogen Interactions	Host-Pathogen Interactions	Virion	Viral Nonstructural Proteins	Antibodies, Neutralizing	Capsid Proteins	Virion	RNA, Viral	Immunity, Innate	Disease Models, Animal	Viral Proteins	Viral Proteins
J Virol	top neg 1	Animals	Antibodies, Viral	Genome, Viral	Immunity, Innate	Protein Binding	Virus Assembly	Virus Replication	Antibodies, Viral	Signal Transduction	Cell Line, Tumor	Viral Nonstructural Proteins	Cell Line	Cell Line, Tumor	Molecular Sequence Data	Viral Load
MBio	top pos 1	Mice	Cell Line	Humans	Virulence Factors	Gene Expression Profiling	Signal Transduction	Gene Expression Profiling	Gene Expression Profiling	Escherichia coli	DNA, Bacterial	Anti-Bacterial Agents	Gene Deletion	Cell Line	Virulence Factors	Virulence
MBio	top pos 2	Animals	Host-Pathogen Interactions	Phylogeny	Humans	Gene Deletion	Gene Expression Regulation, Bacterial	Gene Deletion	Escherichia coli	Signal Transduction	Cell Line	Humans	Mutation	Gene Expression Regulation, Bacterial	Cell Line	Protein Binding
MBio	top pos 3	Disease Models, Animal	Humans	Sequence Analysis, DNA	Host-Pathogen Interactions	DNA, Bacterial	Mutation	Signal Transduction	Anti-Bacterial Agents	Anti-Bacterial Agents	Escherichia coli	Bacterial Proteins	Signal Transduction	Bacterial Proteins	Signal Transduction	Cell Line
MBio	top neg 3	Genome, Bacterial	Phylogeny	Gene Deletion	Mice	Humans	Virulence	Escherichia coli	Virulence Factors	Gene Expression Profiling	Host-Pathogen Interactions	Escherichia coli	Virulence Factors	Virulence	Gene Expression Regulation, Bacterial	DNA, Bacterial
MBio	top neg 2	DNA, Bacterial	Sequence Analysis, DNA	Bacterial Proteins	Disease Models, Animal	Mutation	Virulence Factors	DNA, Bacterial	Bacterial Proteins	Protein Binding	Phylogeny	Mutation	Escherichia coli	Virulence Factors	Virulence	Bacterial Proteins
MBio	top neg 1	Sequence Analysis, DNA	Genome, Bacterial	Gene Expression Regulation, Bacterial	Escherichia coli	Anti-Bacterial Agents	Gene Deletion	Protein Binding	Phylogeny	Mutation	Protein Binding	Genome, Bacterial	Gene Expression Profiling	Signal Transduction	Host-Pathogen Interactions	Host-Pathogen Interactions
Mol Biol Cell	top pos 1	Saccharomyces cerevisiae Proteins	Spindle Apparatus	Humans	Microtubule-Associated Proteins	Animals	HeLa Cells	Endocytosis	Nuclear Proteins	Cell Line	Mutation	Cell Culture Techniques	Cell Nucleus	Cell Culture Techniques	Drosophila Proteins	Cell Line, Tumor
Mol Biol Cell	top pos 2	Saccharomyces cerevisiae	Microtubules	HeLa Cells	Microtubules	Drosophila Proteins	Humans	Signal Transduction	Cell Cycle Proteins	Models, Biological	HeLa Cells	Cell Membrane	Mice	Signal Transduction	Cell Culture Techniques	Models, Biological
Mol Biol Cell	top pos 3	Cell Cycle Proteins	Mitosis	Mitosis	Protein Transport	Mice	Endosomes	Endosomes	Carrier Proteins	Drosophila Proteins	Drosophila Proteins	Models, Biological	Cell Culture Techniques	Endoplasmic Reticulum	Amino Acid Sequence	Nuclear Proteins
Mol Biol Cell	top neg 3	Humans	Endocytosis	Cytoskeleton	Mice	Cell Line, Tumor	Amino Acid Sequence	HEK293 Cells	Microtubule-Associated Proteins	Cell Culture Techniques	Cell Line, Tumor	Cells, Cultured	Endoplasmic Reticulum	Amino Acid Sequence	Mice	Cytoskeleton
Mol Biol Cell	top neg 2	Mice	Cell Membrane	Actins	Cell Line, Tumor	Phosphorylation	Protein Domains	Membrane Proteins	Models, Biological	Rats	Rats	Endosomes	Membrane Proteins	Rats	Models, Biological	Signal Transduction
Mol Biol Cell	top neg 1	Animals	Protein Transport	Actin Cytoskeleton	Signal Transduction	Humans	Protein Binding	Endoplasmic Reticulum	Microtubules	Cells, Cultured	Cell Line	Carrier Proteins	Drosophila Proteins	Cells, Cultured	Cell Membrane	Cell Line
Mol Biol Evol	top pos 1	Phylogeny	Animals	Software	Mutation	Amino Acid Sequence	Phenotype	Adaptation, Physiological	Base Sequence	Sequence Alignment	Adaptation, Biological	Computational Biology	Computational Biology	Genetic Variation	Selection, Genetic	Genomics
Mol Biol Evol	top pos 2	Software	Gene Expression Regulation	Humans	Amino Acid Sequence	Humans	Transcriptome	Base Sequence	Gene Expression Regulation	Gene Expression Regulation	Biological Evolution	Polymorphism, Single Nucleotide	Biological Evolution	Transcriptome	Adaptation, Biological	Transcriptome
Mol Biol Evol	top pos 3	Sequence Alignment	Transcriptome	Algorithms	Models, Genetic	Alleles	Adaptation, Physiological	Genome	Mutation Rate	Animals	Computational Biology	Evolution, Molecular	Evolution, Molecular	Mutation	Gene Duplication	Sequence Alignment
Mol Biol Evol	top neg 3	Alleles	Software	Mutation Rate	Genome	Mutation	Animals	Computer Simulation	Amino Acid Sequence	Genetic Variation	Gene Expression Regulation	Biological Evolution	Adaptation, Biological	Phenotype	Biological Evolution	Gene Duplication
Mol Biol Evol	top neg 2	Selection, Genetic	Computer Simulation	Biological Evolution	Animals	Adaptation, Physiological	Genome	Models, Genetic	Genome	Phylogeny	Models, Genetic	Genetic Variation	Polymorphism, Single Nucleotide	Computer Simulation	Computer Simulation	Genetics, Population
Mol Biol Evol	top neg 1	Gene Frequency	Algorithms	Evolution, Molecular	Genomics	Phenotype	Humans	Gene Expression Regulation	Adaptation, Biological	Gene Duplication	Adaptation, Physiological	Models, Genetic	Gene Duplication	Base Sequence	Phenotype	Sequence Analysis, DNA
Mol Cell	top pos 1	Humans	Models, Molecular	Mice	DNA Repair	Phenotype	Amino Acid Sequence	RNA, Messenger	Phosphorylation	RNA-Binding Proteins	Molecular Sequence Data	Signal Transduction	Cell Cycle Proteins	HeLa Cells	Mutation	DNA Breaks, Double-Stranded
Mol Cell	top pos 2	Animals	Structure-Activity Relationship	Animals	Ubiquitin-Protein Ligases	Saccharomyces cerevisiae	Molecular Sequence Data	RNA Polymerase II	RNA-Binding Proteins	Structure-Activity Relationship	RNA Interference	Protein Interaction Domains and Motifs	Nuclear Proteins	Protein-Serine-Threonine Kinases	Cell Line	DNA Repair
Mol Cell	top pos 3	Mice	Protein Conformation	Cell Line	DNA Replication	Time Factors	Crystallography, X-Ray	RNA-Binding Proteins	Binding Sites	Mice	Amino Acid Sequence	Protein Binding	Protein-Serine-Threonine Kinases	DNA Damage	DNA Repair	Protein Processing, Post-Translational
Mol Cell	top neg 3	Models, Molecular	Gene Expression Regulation, Fungal	Protein Binding	Chromatin Assembly and Disassembly	DNA-Binding Proteins	Time Factors	Animals	Proteolysis	Cell Proliferation	Cell Proliferation	Histones	RNA, Messenger	Cell Proliferation	Carrier Proteins	Mice, Knockout
Mol Cell	top neg 2	Saccharomyces cerevisiae	Saccharomyces cerevisiae	Time Factors	Promoter Regions, Genetic	Chromatin	Bacterial Proteins	Mice, Inbred C57BL	Ubiquitin-Protein Ligases	Gene Expression Regulation, Neoplastic	Cell Line, Tumor	Protein Processing, Post-Translational	DNA Replication	Carrier Proteins	Protein Interaction Domains and Motifs	DNA Replication
Mol Cell	top neg 1	Saccharomyces cerevisiae Proteins	Saccharomyces cerevisiae Proteins	Transfection	Transcription, Genetic	DNA	CRISPR-Cas Systems	Mice, Knockout	Ubiquitination	Molecular Sequence Data	Gene Expression Regulation, Neoplastic	HeLa Cells	DNA Damage	Multiprotein Complexes	Multiprotein Complexes	Cell Cycle Proteins
Mol Ecol	top pos 1	Bacteria	Phylogeny	Phylogeny	Gene Flow	Biodiversity	Hybridization, Genetic	Evolution, Molecular	Geography	Alleles	Animals	Symbiosis	Phenotype	Alleles	Ecosystem	Biodiversity
Mol Ecol	top pos 2	Biodiversity	Phylogeography	Genomics	Ecosystem	Bacteria	Genetic Speciation	Genetic Speciation	Polymorphism, Single Nucleotide	Genomics	Gene Frequency	Genetic Speciation	Haplotypes	Transcriptome	Animals	Selection, Genetic
Mol Ecol	top pos 3	Transcriptome	DNA, Mitochondrial	Polymorphism, Single Nucleotide	Geography	Ecosystem	Alleles	Geography	Haplotypes	Geography	Genomics	Genotype	Bayes Theorem	Models, Genetic	Phenotype	Transcriptome
Mol Ecol	top neg 3	Microsatellite Repeats	Adaptation, Physiological	Genotype	Haplotypes	DNA, Mitochondrial	Ecosystem	Gene Frequency	Biological Evolution	Ecosystem	Geography	Selection, Genetic	Symbiosis	Genetic Variation	Transcriptome	Adaptation, Physiological
Mol Ecol	top neg 2	DNA, Mitochondrial	Selection, Genetic	Genetic Variation	Molecular Sequence Data	Transcriptome	Adaptation, Physiological	Genotype	Bayes Theorem	Adaptation, Physiological	Biological Evolution	Alleles	Phylogeny	Genomics	Hybridization, Genetic	Symbiosis
Mol Ecol	top neg 1	Genetics, Population	Polymorphism, Single Nucleotide	Microsatellite Repeats	Evolution, Molecular	Animals	Biological Evolution	Biological Evolution	Models, Genetic	Transcriptome	Phenotype	Phylogeography	Evolution, Molecular	Phenotype	Geography	Phylogeography
Nat Genet	top pos 1	Genome-Wide Association Study	Middle Aged	Mice	Phylogeny	Genetic Association Studies	Gene Expression Profiling	Phylogeny	Models, Genetic	Epigenesis, Genetic	Base Sequence	Genetic Association Studies	Cells, Cultured	Neoplasms	Alleles	Transcriptome
Nat Genet	top pos 2	Polymorphism, Single Nucleotide	Adult	Enhancer Elements, Genetic	Middle Aged	Case-Control Studies	Quantitative Trait Loci	Genetic Loci	Enhancer Elements, Genetic	DNA Methylation	Cell Line, Tumor	Base Sequence	Transcription Factors	Child	Models, Genetic	Chromatin
Nat Genet	top pos 3	Genetic Predisposition to Disease	Aged	Animals	Aged	Animals	Phenotype	Base Sequence	Promoter Regions, Genetic	Transcriptome	Risk Factors	Child	Neoplasms	Base Sequence	Gene Frequency	Case-Control Studies
Nat Genet	top neg 3	Chromatin	Genotype	Neoplasms	Cell Line, Tumor	Quantitative Trait Loci	Gene Frequency	Humans	Gene Expression Profiling	Cell Line, Tumor	High-Throughput Nucleotide Sequencing	Mice	Epigenesis, Genetic	Exome	Chromosome Mapping	Mutation
Nat Genet	top neg 2	Mice	Phylogeny	High-Throughput Nucleotide Sequencing	Gene Expression Regulation, Neoplastic	Chromatin	Genome, Human	Mice	Chromosome Mapping	Enhancer Elements, Genetic	Chromosome Mapping	Alleles	Chromatin	Transcription Factors	Genotype	Alleles
Nat Genet	top neg 1	Animals	Genetic Variation	Mutation	Humans	Gene Expression Profiling	Sequence Analysis, DNA	Genome, Human	Transcriptome	Base Sequence	Gene Expression Regulation	Neoplasms	Exome	Gene Frequency	Phenotype	Cells, Cultured
Nat Methods	top pos 1	Animals	Proteomics	HEK293 Cells	Sequence Analysis, DNA	Sensitivity and Specificity	Computational Biology	Models, Molecular	HEK293 Cells	Cell Line	Gene Expression Regulation	Cells, Cultured	Gene Expression Regulation	Cells, Cultured	Models, Molecular	RNA
Nat Methods	top pos 2	Mice	Mass Spectrometry	Humans	DNA	Reproducibility of Results	Proteomics	Mutation	Cells, Cultured	Genomics	HeLa Cells	Cell Line	Cell Line	Mutation	Cell Line	Gene Expression Regulation
Nat Methods	top pos 3	Brain	Escherichia coli	HeLa Cells	Genome, Human	Mass Spectrometry	Mice	Escherichia coli	Humans	Imaging, Three-Dimensional	Models, Molecular	Genome, Human	Green Fluorescent Proteins	Escherichia coli	Mice	Image Processing, Computer-Assisted
Nat Methods	top neg 3	Genome, Human	Single-Cell Analysis	Reproducibility of Results	Models, Molecular	Software	Reproducibility of Results	Microscopy, Fluorescence	Sequence Analysis, DNA	Sequence Analysis, DNA	Brain	Mutation	HeLa Cells	Genome, Human	Genomics	Gene Expression Profiling
Nat Methods	top neg 2	Humans	Transcriptome	Software	Proteomics	Microscopy, Fluorescence	Microscopy, Fluorescence	HeLa Cells	Escherichia coli	HeLa Cells	Mutation	HEK293 Cells	RNA	Mice, Inbred C57BL	Gene Expression Profiling	Single-Cell Analysis
Nat Methods	top neg 1	High-Throughput Nucleotide Sequencing	Sequence Analysis, RNA	Algorithms	Mass Spectrometry	Image Processing, Computer-Assisted	Sensitivity and Specificity	Humans	DNA	High-Throughput Nucleotide Sequencing	Escherichia coli	Green Fluorescent Proteins	Models, Molecular	Brain	Neurons	Imaging, Three-Dimensional
Neuroimage	top pos 1	Young Adult	Animals	Magnetic Resonance Imaging	Brain Mapping	Diffusion Tensor Imaging	Photic Stimulation	Nerve Net	Nerve Net	Child	Image Processing, Computer-Assisted	Attention	Connectome	Magnetoencephalography	Prefrontal Cortex	Pattern Recognition, Visual
Neuroimage	top pos 2	Adult	Visual Cortex	Animals	Magnetic Resonance Imaging	White Matter	Visual Cortex	Neural Pathways	Image Interpretation, Computer-Assisted	Adolescent	Neuroimaging	Visual Perception	Brain	Prefrontal Cortex	Computer Simulation	Computer Simulation
Neuroimage	top pos 3	Humans	Electroencephalography	Brain Mapping	Brain	Child	Visual Perception	Connectome	Reproducibility of Results	Neuroimaging	Connectome	Psychomotor Performance	Adult	Neuroimaging	Psychomotor Performance	Psychomotor Performance
Neuroimage	top neg 3	Brain	Aged, 80 and over	White Matter	Electroencephalography	Aged	Connectome	Humans	Adolescent	Adult	Prefrontal Cortex	Visual Cortex	Cerebral Cortex	Reproducibility of Results	Cerebral Cortex	Signal Processing, Computer-Assisted
Neuroimage	top neg 2	Diffusion Magnetic Resonance Imaging	Middle Aged	Diffusion Magnetic Resonance Imaging	Cerebral Cortex	Electroencephalography	Nerve Net	Image Interpretation, Computer-Assisted	Brain	Brain Mapping	Reproducibility of Results	Cerebral Cortex	Brain Mapping	Image Processing, Computer-Assisted	Image Interpretation, Computer-Assisted	Neural Pathways
Neuroimage	top neg 1	Animals	Aged	Humans	Animals	Signal Processing, Computer-Assisted	Cerebral Cortex	Neuroimaging	Signal Processing, Computer-Assisted	Prefrontal Cortex	Image Interpretation, Computer-Assisted	Pattern Recognition, Visual	Models, Neurological	Cerebral Cortex	Attention	Magnetoencephalography
Neuron	top pos 1	Animals	Macaca mulatta	Animals, Genetically Modified	Hippocampus	Neural Pathways	Rats	Macaca mulatta	Interneurons	Signal Transduction	Cerebral Cortex	Axons	Cerebral Cortex	Axons	Synaptic Transmission	Time Factors
Neuron	top pos 2	Mice	Photic Stimulation	Rats	Neuronal Plasticity	Behavior, Animal	Prefrontal Cortex	Mice, Knockout	Neural Inhibition	Neuronal Plasticity	Disease Models, Animal	Calcium	Time Factors	Signal Transduction	Neural Pathways	Axons
Neuron	top pos 3	Mice, Transgenic	Visual Cortex	Mutation	Synapses	Interneurons	Hippocampus	Prefrontal Cortex	Disease Models, Animal	Mice, Inbred C57BL	Neurons	Action Potentials	Nerve Net	Cerebral Cortex	Brain	Synaptic Transmission
Neuron	top neg 3	Magnetic Resonance Imaging	HEK293 Cells	Mice	Mutation	HEK293 Cells	Photic Stimulation	Models, Neurological	Neurons	Cerebral Cortex	HEK293 Cells	Neural Pathways	Axons	Learning	Learning	Mice, Knockout
Neuron	top neg 2	Young Adult	Cells, Cultured	Mice, Inbred C57BL	Disease Models, Animal	Visual Cortex	Synapses	Action Potentials	Calcium	Interneurons	Nerve Net	Optogenetics	Behavior, Animal	Time Factors	Signal Transduction	Learning
Neuron	top neg 1	Adult	Humans	Mice, Transgenic	Macaca mulatta	Photic Stimulation	Animals, Genetically Modified	Nerve Net	Optogenetics	Nerve Tissue Proteins	Optogenetics	HEK293 Cells	Disease Models, Animal	Mutation	Patch-Clamp Techniques	Models, Neurological
Nucleic Acids Res	top pos 1	Models, Molecular	Software	RNA-Binding Proteins	Binding Sites	RNA, Messenger	Transcription, Genetic	Mutation	Internet	Promoter Regions, Genetic	Databases, Genetic	High-Throughput Nucleotide Sequencing	Base Sequence	HeLa Cells	Cell Line	Gene Expression Regulation
Nucleic Acids Res	top pos 2	Nucleic Acid Conformation	Internet	HEK293 Cells	Protein Binding	Promoter Regions, Genetic	HeLa Cells	Amino Acid Sequence	Histones	Internet	Genomics	MicroRNAs	DNA Replication	RNA, Messenger	Mutation	Amino Acid Sequence
Nucleic Acids Res	top pos 3	Escherichia coli	Algorithms	RNA, Messenger	Amino Acid Sequence	Transcription, Genetic	Promoter Regions, Genetic	DNA-Binding Proteins	Amino Acid Sequence	Bacterial Proteins	Histones	Gene Expression Profiling	High-Throughput Nucleotide Sequencing	Escherichia coli	High-Throughput Nucleotide Sequencing	Cell Line
Nucleic Acids Res	top neg 3	Mice	DNA-Binding Proteins	Histones	Mutation	Chromatin	Nucleic Acid Conformation	Chromatin	DNA	Computational Biology	High-Throughput Nucleotide Sequencing	RNA	Models, Molecular	Gene Expression Profiling	Cell Line, Tumor	RNA
Nucleic Acids Res	top neg 2	Humans	HEK293 Cells	Chromatin	Saccharomyces cerevisiae	DNA	Animals	RNA	Databases, Genetic	RNA-Binding Proteins	DNA Replication	RNA-Binding Proteins	Transcription Factors	Cell Line, Tumor	Escherichia coli	Bacterial Proteins
Nucleic Acids Res	top neg 1	Animals	Protein Binding	Transcription Factors	DNA Replication	Humans	Mice	Nucleic Acid Conformation	Genomics	Saccharomyces cerevisiae	DNA-Binding Proteins	Transcription, Genetic	MicroRNAs	Mutation	Gene Expression Profiling	High-Throughput Nucleotide Sequencing
PLoS Biol	top pos 1	Adult	Drosophila melanogaster	Drosophila melanogaster	Neurons	Biological Evolution	Signal Transduction	Neurons	Biological Evolution	Mice, Knockout	Signal Transduction	Adult	Mice	Animals
PLoS Biol	top pos 2	Humans	Biological Evolution	Brain	Animals	Models, Biological	Drosophila melanogaster	Models, Biological	Neurons	Drosophila melanogaster	Brain	Mice, Inbred C57BL	Mice, Knockout	Adult
PLoS Biol	top pos 3	Brain	Mutation	Neurons	Brain	Brain	Animals	Signal Transduction	Signal Transduction	Mice, Inbred C57BL	Biological Evolution	Mice	Adult	Mice, Knockout
PLoS Biol	top neg 3	Mice, Inbred C57BL	Brain	Mice, Knockout	Humans	Drosophila melanogaster	Mice, Knockout	Brain	Drosophila melanogaster	Brain	Animals	Brain	Signal Transduction	Neurons
PLoS Biol	top neg 2	Mice	Humans	Mice	Models, Biological	Signal Transduction	Mice, Inbred C57BL	Drosophila melanogaster	Models, Biological	Animals	Drosophila melanogaster	Mice, Knockout	Humans	Drosophila melanogaster
PLoS Biol	top neg 1	Animals	Adult	Mice, Inbred C57BL	Signal Transduction	Mutation	Mutation	Biological Evolution	Brain	Mice	Humans	Humans	Mice, Inbred C57BL	Mice
PLoS Comput Biol	top pos 1	Models, Neurological	Models, Biological	Animals	Computational Biology	Software	Algorithms	Action Potentials	Models, Genetic	Signal Transduction	Models, Statistical	Algorithms	Signal Transduction	Action Potentials	Software	Adult
PLoS Comput Biol	top pos 2	Nerve Net	Humans	Mice	Software	Models, Genetic	Signal Transduction	Models, Biological	Molecular Dynamics Simulation	Models, Genetic	Computational Biology	Models, Statistical	Models, Statistical	Models, Molecular	Nerve Net	Software
PLoS Comput Biol	top pos 3	Neurons	Computational Biology	Models, Biological	Algorithms	Algorithms	Software	Computational Biology	Action Potentials	Neurons	Humans	Brain	Molecular Dynamics Simulation	Adult	Binding Sites	Action Potentials
PLoS Comput Biol	top neg 3	Binding Sites	Binding Sites	Brain	Models, Genetic	Adult	Models, Molecular	Adult	Mice	Software	Molecular Dynamics Simulation	Signal Transduction	Protein Binding	Models, Biological	Algorithms	Humans
PLoS Comput Biol	top neg 2	Protein Conformation	Protein Binding	Humans	Models, Statistical	Signal Transduction	Computational Biology	Animals	Computer Simulation	Models, Statistical	Software	Software	Computer Simulation	Brain	Computer Simulation	Brain
PLoS Comput Biol	top neg 1	Protein Binding	Protein Conformation	Adult	Computer Simulation	Models, Biological	Models, Genetic	Mice	Models, Molecular	Molecular Dynamics Simulation	Brain	Humans	Binding Sites	Computational Biology	Molecular Dynamics Simulation	Algorithms
PLoS Genet	top pos 1	Animals	Humans	Saccharomyces cerevisiae	Caenorhabditis elegans	Mice	Evolution, Molecular	Signal Transduction	Phenotype	Gene Expression Regulation, Developmental	Mutation	Protein Binding	Transcription, Genetic	Nuclear Proteins	Signal Transduction	Phenotype
PLoS Genet	top pos 2	Drosophila Proteins	Polymorphism, Single Nucleotide	Saccharomyces cerevisiae Proteins	Caenorhabditis elegans Proteins	Humans	Genetic Variation	Genetic Predisposition to Disease	Alleles	Evolution, Molecular	DNA-Binding Proteins	Phenotype	Mutation	Protein Binding	Genetic Variation	Nuclear Proteins
PLoS Genet	top pos 3	Drosophila melanogaster	Genome-Wide Association Study	DNA-Binding Proteins	Mutation	Cell Differentiation	Drosophila melanogaster	Gene Expression Regulation, Developmental	Cell Differentiation	Cell Differentiation	Protein Binding	Promoter Regions, Genetic	Gene Expression Regulation, Developmental	Transcription, Genetic	Genetic Predisposition to Disease	Signal Transduction
PLoS Genet	top neg 3	Gene Expression Regulation, Plant	Gene Expression Regulation, Plant	Gene Expression Regulation, Plant	Transcription Factors	Animals, Genetically Modified	Promoter Regions, Genetic	Promoter Regions, Genetic	Drosophila Proteins	Humans	Saccharomyces cerevisiae	DNA-Binding Proteins	Animals	Gene Expression Regulation	Animals, Genetically Modified	Transcription, Genetic
PLoS Genet	top neg 2	Arabidopsis Proteins	Arabidopsis	Arabidopsis Proteins	Drosophila melanogaster	Drosophila Proteins	DNA-Binding Proteins	Gene Expression Regulation	Protein Binding	Nuclear Proteins	Signal Transduction	Evolution, Molecular	DNA-Binding Proteins	Mutation	Genotype	Transcription Factors
PLoS Genet	top neg 1	Arabidopsis	Arabidopsis Proteins	Arabidopsis	Drosophila Proteins	Drosophila melanogaster	Transcription Factors	Evolution, Molecular	Transcription, Genetic	Mutation	Gene Expression Regulation	Nuclear Proteins	Protein Binding	DNA-Binding Proteins	Phenotype	Alleles
PLoS Negl Trop Dis	top pos 1	Adolescent	Mice	Prevalence	Genotype	Insect Vectors	Cross-Sectional Studies	Cross-Sectional Studies	Disease Outbreaks	Brazil	Disease Outbreaks	Antibodies, Viral	Risk Factors	Aedes	Cross-Sectional Studies	Mice
PLoS Negl Trop Dis	top pos 2	Young Adult	Disease Models, Animal	Child, Preschool	Phylogeny	Aedes	Risk Factors	Prevalence	Brazil	Prevalence	Cross-Sectional Studies	Insect Vectors	Insect Vectors	Antibodies, Viral	Phylogeny	Phylogeny
PLoS Negl Trop Dis	top pos 3	Middle Aged	Prevalence	Infant	Humans	Animals	Humans	Risk Factors	Risk Factors	Dengue Virus	Adolescent	Disease Outbreaks	Disease Models, Animal	Genotype	Aged, 80 and over	Animals
PLoS Negl Trop Dis	top neg 3	Disease Models, Animal	Aedes	Adult	Animals	Disease Models, Animal	Infant	Child	Cross-Sectional Studies	Phylogeny	Aged	Disease Models, Animal	Disease Outbreaks	Disease Models, Animal	Antibodies, Viral	Insect Vectors
PLoS Negl Trop Dis	top neg 2	Mice	Dengue Virus	Aged	Disease Models, Animal	Mice	Genotype	Child, Preschool	Phylogeny	Disease Outbreaks	Aged, 80 and over	Genotype	Aged, 80 and over	Insect Vectors	Genotype	Genotype
PLoS Negl Trop Dis	top neg 1	Animals	Dengue	Middle Aged	Mice	Antibodies, Viral	Phylogeny	Infant	Insect Vectors	Risk Factors	Risk Factors	Dengue	Prevalence	Humans	Prevalence	Disease Models, Animal
PLoS Pathog	top pos 1	Humans	Immunoprecipitation	Bacterial Proteins	Immunity, Innate	Bacterial Proteins	Immunity, Innate	Host-Parasite Interactions	Real-Time Polymerase Chain Reaction	Immunoblotting	Macrophages	Real-Time Polymerase Chain Reaction	Cell Line	Macrophages	Real-Time Polymerase Chain Reaction	Mutation
PLoS Pathog	top pos 2	HIV-1	Transfection	Virulence	Cells, Cultured	Virulence	Immunoblotting	Macrophages	Amino Acid Sequence	Cells, Cultured	Host-Pathogen Interactions	RNA, Viral	Immunoblotting	Viral Proteins	Enzyme-Linked Immunosorbent Assay	Host-Parasite Interactions
PLoS Pathog	top pos 3	HIV Infections	Fluorescent Antibody Technique	Viral Proteins	HEK293 Cells	HEK293 Cells	Signal Transduction	Transfection	Viral Proteins	Virus Replication	Fluorescent Antibody Technique	Virus Replication	Host-Parasite Interactions	Amino Acid Sequence	Mutation	Host-Pathogen Interactions
PLoS Pathog	top neg 3	Mice, Inbred C57BL	Mutation	Flow Cytometry	Virulence	Viral Proteins	RNA, Viral	Enzyme-Linked Immunosorbent Assay	Immunity, Innate	Signal Transduction	Host-Parasite Interactions	Polymerase Chain Reaction	Cells, Cultured	Humans	Macrophages	Viral Proteins
PLoS Pathog	top neg 2	Animals	Virulence	HIV-1	Bacterial Proteins	Virus Replication	Virus Replication	Host-Pathogen Interactions	Signal Transduction	Cell Line	Signal Transduction	Humans	HEK293 Cells	Bacterial Proteins	Fluorescent Antibody Technique	Signal Transduction
PLoS Pathog	top neg 1	Mice	Animals	HIV Infections	Polymerase Chain Reaction	RNA, Viral	Mice, Inbred BALB C	Mutation	Polymerase Chain Reaction	Blotting, Western	Amino Acid Sequence	HEK293 Cells	Blotting, Western	HEK293 Cells	Amino Acid Sequence	RNA, Viral
Syst Biol	top pos 1	Models, Genetic	Evolution, Molecular	Models, Biological	Gene Flow	Evolution, Molecular	Species Specificity	Phylogeny	Biodiversity	Lizards	Phenotype	Phylogeny	Genome	Computer Simulation	Classification	Animals
Syst Biol	top pos 2	Algorithms	Models, Genetic	Bayes Theorem	Genetic Speciation	Biological Evolution	Bayes Theorem	Models, Biological	Software	Models, Genetic	Classification	Models, Genetic	Models, Biological	Evolution, Molecular	Software	Gene Flow
Syst Biol	top pos 3	Software	Fossils	Time	Phenotype	Phenotype	Genome	Biodiversity	Genetic Speciation	Biodiversity	Phylogeny	Biodiversity	Phenotype	Software	Phylogeny	Phylogeny
Syst Biol	top neg 3	Animals	Phenotype	Genome	Time	Classification	Computer Simulation	Fossils	Biological Evolution	Genome	Models, Biological	Classification	Phylogeny	Classification	Biodiversity	Biological Evolution
Syst Biol	top neg 2	Time	Classification	Lizards	Fossils	Genetic Speciation	Lizards	Classification	Phylogeny	Gene Flow	Computer Simulation	Software	Biological Evolution	Genetic Speciation	Animals	Genome
Syst Biol	top neg 1	Fossils	Models, Biological	Animals	Classification	Computer Simulation	Biological Evolution	Phenotype	Phenotype	Software	Bayes Theorem	Lizards	Species Specificity	Biological Evolution	Algorithms	Species Specificity
eNeuro	top pos 1	Animals	Action Potentials	Rats	Cerebral Cortex	Synapses	Cells, Cultured	Patch-Clamp Techniques	Mice, Knockout	Rats, Long-Evans	Cerebral Cortex	Cerebral Cortex	Motor Activity	Neuronal Plasticity	Hippocampus	Hippocampus
eNeuro	top pos 2	Mice, Inbred C57BL	Models, Neurological	Rats, Long-Evans	Rats, Sprague-Dawley	Neuronal Plasticity	Mice, Knockout	Magnetic Resonance Imaging	Magnetic Resonance Imaging	Hippocampus	Photic Stimulation	Behavior, Animal	Neurons	Mice, Transgenic	Photic Stimulation	Electroencephalography
eNeuro	top pos 3	Mice, Transgenic	Patch-Clamp Techniques	Behavior, Animal	Cells, Cultured	Tissue Culture Techniques	Photic Stimulation	Brain Mapping	Neural Pathways	Axons	Motor Activity	Signal Transduction	Middle Aged	Synapses	Axons	Neurons
eNeuro	top neg 3	Humans	Mice, Knockout	Mice, Transgenic	Photic Stimulation	Action Potentials	Middle Aged	Motor Activity	Mice, Transgenic	Disease Models, Animal	Signal Transduction	Action Potentials	Brain	Axons	Animals, Newborn	Patch-Clamp Techniques
eNeuro	top neg 2	Young Adult	Disease Models, Animal	Mice, Inbred C57BL	Visual Perception	Models, Neurological	Neural Pathways	Cells, Cultured	Patch-Clamp Techniques	Rats, Sprague-Dawley	Middle Aged	Hippocampus	Animals, Newborn	Patch-Clamp Techniques	Neural Pathways	Signal Transduction
eNeuro	top neg 1	Adult	Mice	Tissue Culture Techniques	Motor Activity	Mice	Mice, Transgenic	Axons	Electroencephalography	Brain	Brain	Animals, Newborn	Axons	Mice, Knockout	Neuronal Plasticity	Photic Stimulation
