# Supplementary material for: Releasing a preprint is associated with more attention and citations for the peer-reviewed article
Source: eLife journal article supplement (doi:10.7554/elife.52646), 2019-12-06
Supplement: supp [file elife-52646-supp-v1.zip › elife_poa_e52646_Supplementary_file_6.csv]

Metric	Journal	MAE of log-linear	MAE of gamma	MAE of negative binomial	MAPE of log-linear	MAPE of gamma	MAPE of negative binomial
citations	Am J Hum Genet	13.2080229315757	14.3067205642571	14.329632394187	58.6323635852469	77.5325862582139	77.6301784190136
citations	BMC Bioinformatics	5.2938247700124	5.96451327938257	5.99974213278173	84.7524368726002	138.101908711591	138.231222640069
citations	BMC Genomics	5.95580004383235	6.26285850287234	6.25813368121263	72.1506884029845	98.4178834722531	98.3087227890121
citations	Bioinformatics	12.1595521938298	14.6418634069394	14.684219705253	109.733642397585	232.933564909004	232.907884466455
citations	Biophys J	5.56676716624212	5.87886955495898	5.8829934191378	66.3386930134257	88.3269892083241	88.1762773995884
citations	Cell	45.84814107958	49.399745645058	49.4124878263894	61.2162700536359	81.6085153202095	81.5951015292458
citations	Cell Rep	12.9272899593613	13.7378617986408	13.743095092733	64.9684997484279	85.8736174166745	85.898419879801
citations	Development	6.34524329043828	6.57257273643701	6.57303659963217	64.9469044676388	82.6574380217384	82.6008878574115
citations	Elife	11.0488628896906	11.812617365472	11.8176992336819	73.3753335827967	102.031603386022	101.813957464488
citations	Evolution	5.54057255613552	5.69712013515245	5.69338110349588	64.2637342828229	80.2104317536666	80.1718269470288
citations	G3 (Bethesda)	4.19399738965721	4.48299242028497	4.49522380523118	71.4273050234442	97.5449684035894	97.1873927344691
citations	Genetics	7.02117963231699	7.60589643570851	7.62443737991614	83.9513723731229	122.931300397241	123.109483533803
citations	Genome Biol	23.023043784018	25.1304646709871	25.153335557853	78.4683370321235	119.792092683008	119.42337671975
citations	Genome Biol Evol	5.40985963082039	5.54180364675545	5.52844500583984	67.9089117261692	86.9996118411805	86.4678841697316
citations	Genome Res	19.2932443327975	21.2786147475402	21.3086422912313	72.2371530288507	110.270654585176	110.107007281691
citations	Gigascience	11.1362183047396	12.0758585908188	12.0598764533033	71.9919840648469	116.133271224448	114.445447090425
citations	ISME J	11.6778118208946	12.2351558755258	12.2382784637062	65.5557827270414	85.1690984906082	85.185902909269
citations	J Biol Chem	5.38852995672555	5.61889572167819	5.62530926413459	64.7118551192621	82.8329395814975	83.0012160572357
citations	J Cell Biol	10.7320195421944	11.2027848057281	11.2152004620374	61.8202001360482	78.5874209523087	78.5756353178672
citations	J Neurophysiol	3.97348509540233	4.11939503636939	4.10892902390386	67.9816570360466	88.8029345439852	88.1431648494531
citations	J Neurosci	9.92688485523527	10.3992297916582	10.3991329128187	65.8410693775805	84.9218555829392	84.8867432223285
citations	J Virol	6.13202867331338	6.4114934604215	6.41455515348672	70.7125626470767	92.0945369545652	91.9321652324466
citations	MBio	8.79718317549631	9.15193300665047	9.15355267481256	69.3626848454765	92.1479824395817	92.0235280837104
citations	Mol Biol Cell	5.48508910181399	5.78011669296012	5.80914355977639	63.7650179707153	82.1876596913696	82.4742425187974
citations	Mol Biol Evol	25.5841545764014	27.9364921223089	27.9826738788887	93.3600820082032	195.726306798039	197.374928862979
citations	Mol Cell	18.9219807036634	19.9845437610984	20.0006602798534	60.5466173395872	77.9713971989619	77.9695550086907
citations	Mol Ecol	7.5099601717152	7.82953423313125	7.83634301236385	61.8952449374968	79.0578581445474	79.2662260576334
citations	Nat Genet	41.5731410471053	44.7921368859403	44.8220456939917	63.9294670300181	86.2509177315671	86.2937345608587
citations	Nat Methods	45.9464237891859	50.2342116366395	50.227890918557	71.4551592388895	106.631080476574	106.49230727995
citations	Neuroimage	8.51877050427322	9.10343029801403	9.12003629560902	73.6759678676544	102.586068152697	102.423819583593
citations	Neuron	17.4615279238819	18.3965966182988	18.412355555537	56.9353765548805	72.1525823090329	72.1429379014193
citations	Nucleic Acids Res	21.2344026171769	25.0066183020778	25.0893573991074	99.3001784518514	210.134199603843	209.637551653302
citations	PLoS Biol	13.2351625739419	14.6232824527322	14.6638453631954	80.2411180084369	122.583181522291	122.18540126398
citations	PLoS Comput Biol	8.1456340830976	9.00001026211425	9.03184624160034	74.3006737925989	112.093728720796	111.837479122704
citations	PLoS Genet	8.22751733242416	8.57654687797955	8.57910062668689	66.1573692980669	84.6185354138754	84.5783376565709
citations	PLoS Negl Trop Dis	5.57703763655988	5.89919156489946	5.90007452331045	61.8230466201458	80.8850608051514	80.5166796851187
citations	PLoS Pathog	8.87327431752542	9.268015559473	9.26730964608427	62.0679321612467	78.8818022478015	78.885932959726
citations	Syst Biol	14.7577339356042	16.7639031042954	16.8667004699293	101.168318457449	188.917946002717	189.869881912221
citations	eNeuro	3.80921160617571	4.01849123271657	4.00974611114358	71.5952098011129	96.7914666056978	96.7043519204433
Attention Score	Am J Hum Genet	33.0002067844914	41.1757126853731		140.507662678936	393.053314402115
Attention Score	BMC Bioinformatics	3.36741948405594	3.88110297240007		73.6430301826717	129.678369652211
Attention Score	BMC Genomics	3.36563188646019	4.06237530437969		70.054029408437	137.487258171106
Attention Score	Bioinformatics	6.01183096335542	6.57165546706095		92.6587885920108	161.236233591681
Attention Score	Biophys J	4.22522615294962	5.7034742950703		71.0988917718175	205.840692589037
Attention Score	Cell	93.6693828238539	107.55366206686		171.225285692676	342.003846692131
Attention Score	Cell Rep	25.3968502249093	32.2212278208733		135.951328315192	404.469594282843
Attention Score	Development	9.11896775345886	10.5262849297869		117.389315942613	262.485191209038
Attention Score	Elife	32.1345839224394	40.3294516878672		184.565159425899	629.095144170019
Attention Score	Evolution	12.7206158952876	15.8512437037998		86.2853458123171	194.780603219179
Attention Score	G3 (Bethesda)	5.19535863417302	5.61877290879392		90.9788642992299	145.820807636254
Attention Score	Genetics	11.1622715645149	13.3817190983757		110.937225436675	269.581868676307
Attention Score	Genome Biol	25.2884162977243	29.1740503861721		112.086061091897	218.188982802267
Attention Score	Genome Biol Evol	7.24166989872365	8.6857676206016		83.0118566503519	162.915413966729
Attention Score	Genome Res	21.723535602219	26.2480600752344		111.434651052526	245.429469138271
Attention Score	Gigascience	14.5920371396475	17.2242198080169		76.6522006305509	137.02516348372
Attention Score	ISME J	14.0455065670178	15.9208464479669		90.0051573724793	151.697805115642
Attention Score	J Biol Chem	4.16872596039947	5.71053858608865		68.4387544967985	205.850778857227
Attention Score	J Cell Biol	14.6759444579743	17.9338265990517		93.0351769672586	199.819125781646
Attention Score	J Neurophysiol	3.90633261785755	4.98130584589195		62.2986141182761	145.264202666206
Attention Score	J Neurosci	15.5948680550912	20.3274592821707		115.495344202782	350.751530176578
Attention Score	J Virol	4.40287962669028	5.89230851492626		71.1265922520091	201.161545758136
Attention Score	MBio	22.0721436000711	28.1621880346246		106.580645118872	295.375867028467
Attention Score	Mol Biol Cell	3.17451777580224	3.86990490121105		66.1071314224485	132.499593578135
Attention Score	Mol Biol Evol	18.5031607545983	22.2000967038439		95.9487654788639	195.3884153774
Attention Score	Mol Cell	21.550069962971	25.7446379438797		149.412305034122	366.583173158411
Attention Score	Mol Ecol	9.35811243277292	10.9206046197488		103.034862279671	208.155701647552
Attention Score	Nat Genet	85.4888231317269	96.2954684154571		95.5510692582565	168.705280152946
Attention Score	Nat Methods	43.7214178088184	47.0849967329205		139.238169074331	259.368244837794
Attention Score	Neuroimage	9.16935093115356	11.6717251859732		102.618758511505	271.55968115281
Attention Score	Neuron	47.4503357766448	53.9607179931209		192.942318062496	418.324898107108
Attention Score	Nucleic Acids Res	5.05562998636119	5.90310151394404		91.0470788091776	183.673903935633
Attention Score	PLoS Biol	86.582649633816	104.849773306275		191.417371060471	505.174194398639
Attention Score	PLoS Comput Biol	16.3208783076391	19.8197314090569		128.881997563135	324.35017097055
Attention Score	PLoS Genet	16.3205077221227	20.3613497281224		120.893556476811	314.955351684596
Attention Score	PLoS Negl Trop Dis	10.5485605534047	13.6869775031388		105.185276277272	305.369441850979
Attention Score	PLoS Pathog	18.4191711920666	23.1321922813989		123.110764241152	332.481526276168
Attention Score	Syst Biol	9.94616589011085	11.0259063112591		105.858000174973	184.03017934298
Attention Score	eNeuro	11.7323583719415	15.1480190448857		112.458853053696	331.119051343209
