# Supplementary material for: Releasing a preprint is associated with more attention and citations for the peer-reviewed article
Source: eLife journal article supplement (doi:10.7554/elife.52646), 2019-12-06
Supplement: supp [file elife-52646-supp-v1.zip › elife_poa_e52646_Supplementary_file_7.csv]

Metric	Journal	Variable	Coefficient	Standard error	t-statistic	p-value	95% CI (lower)	95% CI (upper)
citations	Am J Hum Genet	(Intercept)	3.01925990628216	0.373502864918787	8.08363252297585	2.87883922543881e-15	2.28720774291881	3.75131206964551
citations	Am J Hum Genet	preprintTRUE	0.547552933657904	0.13520947053336	4.04966406197714	5.71974013381934e-05	0.28254724104379	0.812558626272019
citations	Am J Hum Genet	ns(pub_date, df = 3)1	-0.939768049487822	0.16746218510793	-5.61182244745069	2.91616274521863e-08	-1.26798790107174	-0.611548197903901
citations	Am J Hum Genet	ns(pub_date, df = 3)2	-2.97124687497958	0.31118577544177	-9.5481449007799	2.32864121170036e-20	-3.58115978734661	-2.36133396261254
citations	Am J Hum Genet	ns(pub_date, df = 3)3	-2.90760430023522	0.135944675936045	-21.3881439652929	5.22480891533061e-78	-3.17405096895984	-2.64115763151061
citations	Am J Hum Genet	log2(authors)	0.106770571950916	0.0352897681200508	3.02553906241882	0.00257553173036133	0.0376038974128467	0.175937246488985
citations	Am J Hum Genet	log2(references + 1)	0.346297086983764	0.0645586988140869	5.36406546824951	1.11662942457394e-07	0.219764362419385	0.472829811548143
citations	Am J Hum Genet	any_affil_usaTRUE	-0.00379997484020134	0.0861851925845143	-0.0440908087137479	0.964844963005113	-0.172719848306498	0.165119898626095
citations	Am J Hum Genet	any_affil_nature_indexTRUE	0.0159341417435154	0.123537617469945	0.128982103345096	0.89740994929859	-0.226195139233463	0.258063422720494
citations	Am J Hum Genet	last_author_pub_age	-0.00535033435724072	0.00468780804801549	-1.14132965821962	0.254134530586555	-0.0145382692977881	0.00383760058330666
citations	Am J Hum Genet	PC1	-0.0454107936642237	0.0190090501534314	-2.38890387987253	0.0171703898800317	-0.0826678473452648	-0.00815373998318259
citations	Am J Hum Genet	PC2	-0.00882671131850402	0.0229502688137109	-0.384601652823813	0.700652818825641	-0.0538084116288902	0.0361549889918821
citations	Am J Hum Genet	PC3	-0.0138355854765158	0.0237637047765736	-0.582215004209067	0.560614848132244	-0.0604115909778425	0.0327404200248109
citations	Am J Hum Genet	PC4	-0.104191166973105	0.0250328704215917	-4.16217418212004	3.55716174037775e-05	-0.153254691429083	-0.0551276425171277
citations	Am J Hum Genet	PC5	0.00344080140479902	0.0277112881630783	0.124166057692815	0.901220489830082	-0.0508723253600456	0.0577539281696436
citations	Am J Hum Genet	PC6	-0.0647225947619875	0.0285557181974392	-2.2665371017631	0.0237318546745382	-0.120690773981643	-0.00875441554233177
citations	Am J Hum Genet	PC7	-0.0551487639177005	0.0308194399997938	-1.78941486016843	0.0739929461258068	-0.11555375634099	0.00525622850558856
citations	Am J Hum Genet	PC8	0.00992093201211618	0.0310159883124628	0.31986509384032	0.749168851427409	-0.0508692880252262	0.0707111520494586
citations	Am J Hum Genet	PC9	-0.0210403555912041	0.0313072923567313	-0.672059255443094	0.501774244306082	-0.0824015210638637	0.0403208098814554
citations	Am J Hum Genet	PC10	-4.6850117824521e-05	0.0322112710350289	-0.00145446349427108	0.998839933016905	-0.0631797812427395	0.0630860810070904
citations	Am J Hum Genet	PC11	0.0258602871744417	0.032247862350135	0.801922524155571	0.422877922025704	-0.0373443616102282	0.0890649359591116
citations	Am J Hum Genet	PC12	0.00255670399763134	0.0332553529305202	0.0768809762137549	0.938740845962092	-0.0626225900393567	0.0677359980346194
citations	Am J Hum Genet	PC13	-0.0285122500258894	0.0333851491944424	-0.854039916366041	0.393383629654826	-0.0939459400654928	0.0369214400137141
citations	Am J Hum Genet	PC14	0.000167533559365739	0.0341333927544135	0.00490820120259144	0.996085277286316	-0.0667326869094452	0.0670677540281767
citations	Am J Hum Genet	PC15	-0.00769924176436804	0.0344630684461892	-0.223405579116952	0.823286958524067	-0.0752456147156377	0.0598471311869016
citations	BMC Bioinformatics	(Intercept)	1.47840051322605	0.243652251031756	6.06766613879287	1.53697868981943e-09	1.00085087645169	1.9559501500004
citations	BMC Bioinformatics	preprintTRUE	0.481583009341425	0.111906502738411	4.30344079706571	1.75937370367143e-05	0.262250294338306	0.700915724344544
citations	BMC Bioinformatics	ns(pub_date, df = 3)1	-0.906917289331296	0.115537112288319	-7.84957552918678	6.61575948302259e-15	-1.13336586829416	-0.680468710368431
citations	BMC Bioinformatics	ns(pub_date, df = 3)2	-2.43207914847871	0.246258657321945	-9.87611633608129	1.6325907316799e-22	-2.91473724771091	-1.94942104924651
citations	BMC Bioinformatics	ns(pub_date, df = 3)3	-2.14623982056751	0.0932286254165362	-23.0212535149835	1.08483623602924e-104	-2.3289645687121	-1.96351507242292
citations	BMC Bioinformatics	log2(authors)	0.0996123117175627	0.0359616458064082	2.7699597580657	0.00565595636517517	0.0291287811122167	0.170095842322909
citations	BMC Bioinformatics	log2(references + 1)	0.273031046309929	0.0416154462676025	6.56081024709526	6.7291339606182e-11	0.191466270424866	0.354595822194992
citations	BMC Bioinformatics	any_affil_usaTRUE	0.0351303310956848	0.0593751529416168	0.591667210191917	0.55413754035941	-0.0812428302464415	0.151503492437811
citations	BMC Bioinformatics	any_affil_nature_indexTRUE	0.196901338728701	0.0595401475038518	3.30703478213525	0.000958888995302242	0.0802047939869492	0.313597883470453
citations	BMC Bioinformatics	last_author_pub_age	0.00565596856339605	0.00462014739838348	1.22419656251118	0.22101626087374	-0.00339935394070201	0.0147112910674941
citations	BMC Bioinformatics	PC1	0.0674348843564254	0.0193025895706918	3.4935667108011	0.000486543466424438	0.029602503989511	0.10526726472334
citations	BMC Bioinformatics	PC2	5.57532993853977e-05	0.0203117530613425	0.00274487875157895	0.997810168708093	-0.039754551163717	0.0398660577624878
citations	BMC Bioinformatics	PC3	0.070484286077385	0.0208524722643138	3.38014050247699	0.000737824770707073	0.0296141914507096	0.11135438070406
citations	BMC Bioinformatics	PC4	-0.0453237877975323	0.0222010174731526	-2.04151849582307	0.0413248367506039	-0.0888369824650558	-0.00181059313000876
citations	BMC Bioinformatics	PC5	-0.0594025207083563	0.0236250695338395	-2.51438501051905	0.0119986831971162	-0.105706806126936	-0.0130982352897764
citations	BMC Bioinformatics	PC6	0.0274524320399183	0.0248857365223711	1.10313922255184	0.270093893988115	-0.0213227152726821	0.0762275793525187
citations	BMC Bioinformatics	PC7	0.0577798624623729	0.0251215333430677	2.30001336595631	0.0215457103666165	0.00854256187353807	0.107017163051208
citations	BMC Bioinformatics	PC8	0.0167088609822378	0.0253616432855422	0.658824067278121	0.510081428209209	-0.032999046446177	0.0664167684106526
citations	BMC Bioinformatics	PC9	0.0447308585714461	0.026248804084933	1.70411034448316	0.0885093294320637	-0.0067158520722705	0.0961775692151626
citations	BMC Bioinformatics	PC10	-0.0448269910729707	0.0263615815211422	-1.70046668243402	0.0891921639355107	-0.096494741429926	0.00684075928398467
citations	BMC Bioinformatics	PC11	-0.0156577515314492	0.0266951954993618	-0.586538185563148	0.55757734248266	-0.067979373270454	0.0366638702075557
citations	BMC Bioinformatics	PC12	0.0515635020908172	0.0271794529493579	1.89715010772633	0.0579460538623564	-0.00170724680942524	0.10483425099106
citations	BMC Bioinformatics	PC13	0.0810277240922744	0.0278560580272155	2.90880080782105	0.00366653849892771	0.0264308536076742	0.135624594576875
citations	BMC Bioinformatics	PC14	0.00100371215307249	0.0280286972479438	0.0358101607146985	0.97143715583402	-0.0539315249864743	0.0559389492926193
citations	BMC Bioinformatics	PC15	0.0137603418644715	0.0286461897662673	0.480355048149376	0.631025296507828	-0.0423851583717123	0.0699058421006552
citations	BMC Genomics	(Intercept)	1.66390405441833	0.185607302142523	8.9646475931247	4.65420227062995e-19	1.30012042695134	2.02768768188532
citations	BMC Genomics	preprintTRUE	0.555264750875485	0.0844347034302508	6.57626222770088	5.43712339024307e-11	0.389775773106872	0.720753728644097
citations	BMC Genomics	ns(pub_date, df = 3)1	-0.964538731131518	0.0730047622960803	-13.2119974203834	4.73480285689504e-39	-1.10762543593174	-0.821452026331293
citations	BMC Genomics	ns(pub_date, df = 3)2	-3.34003282231489	0.159916601810831	-20.8860917784252	4.25414118918859e-92	-3.65346360239415	-3.02660204223563
citations	BMC Genomics	ns(pub_date, df = 3)3	-2.83324926694095	0.0602389780506656	-47.0334882600094	0	-2.95131549438575	-2.71518303949614
citations	BMC Genomics	log2(authors)	0.199635710765245	0.0217519422885019	9.17783378226286	6.83746940776143e-20	0.157002687285988	0.242268734244503
citations	BMC Genomics	log2(references + 1)	0.329652518595115	0.029023222738315	11.3582327354682	1.87034129040886e-29	0.272768047312733	0.386536989877496
citations	BMC Genomics	any_affil_usaTRUE	0.0909040197396619	0.0359275687196214	2.5302023760382	0.0114371703554942	0.0204872789971161	0.161320760482208
citations	BMC Genomics	any_affil_nature_indexTRUE	0.0129344495847496	0.0354674881874428	0.364684680132749	0.715365789173689	-0.0565805498847381	0.0824494490542374
citations	BMC Genomics	last_author_pub_age	-0.00158817397926118	0.00236494387746385	-0.671548274102948	0.501909524483849	-0.00622337880454883	0.00304703084602647
citations	BMC Genomics	PC1	0.0135752948175352	0.00983267946862425	1.38063026063786	0.167468673237299	-0.00569640281249472	0.0328469924475652
citations	BMC Genomics	PC2	-0.0725117851446966	0.0118693115284088	-6.1091820676492	1.0954925710996e-09	-0.0957752082616638	-0.0492483620277294
citations	BMC Genomics	PC3	0.0294544720938349	0.0117245625647631	2.51220221915632	0.0120365095026123	0.00647475173241267	0.0524341924552571
citations	BMC Genomics	PC4	0.00703527210548484	0.012768028491116	0.55100692408229	0.581659246926626	-0.0179896038906837	0.0320601481016534
citations	BMC Genomics	PC5	0.0126395906935407	0.0133561733958115	0.946348203109167	0.344027333165634	-0.0135380281335219	0.0388172095206033
citations	BMC Genomics	PC6	-0.0705858405683691	0.0147867057614232	-4.77360148414663	1.87332619318823e-06	-0.0995672513107493	-0.0416044298259888
citations	BMC Genomics	PC7	0.0149287475692406	0.0152221956945866	0.980722352331181	0.326788113480439	-0.0149062077577699	0.044763702896251
citations	BMC Genomics	PC8	0.0281085296194659	0.0152528084443129	1.84284289166081	0.0654248102874068	-0.00178642559447573	0.0580034848334075
citations	BMC Genomics	PC9	-0.0139100120583017	0.0158253115875744	-0.878972396930461	0.379468259800868	-0.0449270528140719	0.0171070286974686
citations	BMC Genomics	PC10	-0.00684589984246694	0.0162754439253035	-0.420627533963827	0.674049346795107	-0.038745183768463	0.0250533840835291
citations	BMC Genomics	PC11	-0.0200749148286701	0.0164493055645582	-1.22041108360974	0.222379955050998	-0.0523149613058984	0.0121651316485582
citations	BMC Genomics	PC12	0.0119164697764339	0.0169789322028237	0.701838586436678	0.482820061588816	-0.0213616258370477	0.0451945653899156
citations	BMC Genomics	PC13	-0.0569971706423579	0.0170131031850454	-3.35019249706654	0.000814926721148345	-0.0903422401503106	-0.0236521011344052
citations	BMC Genomics	PC14	0.0163653058027698	0.0174467042613668	0.938017035057353	0.348291452092312	-0.0178296061984307	0.0505602178039703
citations	BMC Genomics	PC15	-0.0174259106735266	0.0174887755731204	-0.996405414471075	0.31911258373719	-0.0517032809305464	0.0168514595834932
citations	Bioinformatics	(Intercept)	2.6254580607121	0.181121258762794	14.4955820131006	7.587186598177e-46	2.27046691670246	2.98044920472173
citations	Bioinformatics	preprintTRUE	0.760933245883842	0.0957362143661065	7.94822785632555	2.79444049024844e-15	0.573293713710068	0.948572778057617
citations	Bioinformatics	ns(pub_date, df = 3)1	-1.53926903916297	0.135023248821352	-11.4000296437806	2.06597698529698e-29	-1.80390974392841	-1.27462833439753
citations	Bioinformatics	ns(pub_date, df = 3)2	-3.13758618184295	0.272872614654249	-11.498354958846	7.01805770948756e-30	-3.67240667893256	-2.60276568475335
citations	Bioinformatics	ns(pub_date, df = 3)3	-1.93328175347138	0.160859964201264	-12.0184146693736	2.02677298505063e-32	-2.24856148986026	-1.6180020170825
citations	Bioinformatics	log2(authors)	0.126003109109142	0.0389213670490358	3.23737624504286	0.00122152435718518	0.0497186314639681	0.202287586754317
citations	Bioinformatics	log2(references + 1)	0.247443417836674	0.0292529657355613	8.458746373735	4.44463894009153e-17	0.190108658553989	0.304778177119358
citations	Bioinformatics	any_affil_usaTRUE	0.113402425127937	0.0619543797770317	1.83041821314429	0.0673019715437366	-0.00802592791956194	0.234830778175436
citations	Bioinformatics	any_affil_nature_indexTRUE	0.122704314207734	0.0616788474894933	1.98940672859746	0.046761059320618	0.00181599452038866	0.24359263389508
citations	Bioinformatics	last_author_pub_age	-0.00537095368014925	0.00470402277105919	-1.14177884367254	0.253651221914258	-0.0145906688938816	0.00384876153358307
citations	Bioinformatics	PC1	0.00304927052420347	0.0210761538515504	0.144678699239006	0.884975784197219	-0.0382592319574605	0.0443577730058675
citations	Bioinformatics	PC2	-0.0439133408085913	0.0237664162562168	-1.84770561683251	0.0647585881348336	-0.0904946607123635	0.00266797909518089
citations	Bioinformatics	PC3	-0.101713640437173	0.0259989725027834	-3.91221770115276	9.37992588003707e-05	-0.152670690177676	-0.0507565906966704
citations	Bioinformatics	PC4	0.0575699546524403	0.026405495061138	2.18022629453246	0.0293301896597448	0.00581613533865945	0.109323773966221
citations	Bioinformatics	PC5	0.0247289266840134	0.0273338954159739	0.904698225689482	0.365709198526679	-0.0288445238884798	0.0783023772565067
citations	Bioinformatics	PC6	0.0603596631504504	0.0289766285903893	2.08304644421159	0.0373445947158838	0.00356651471989376	0.117152811581007
citations	Bioinformatics	PC7	-0.0325390740229079	0.0289792870629647	-1.12283901091868	0.261609666056255	-0.0893374329639663	0.0242592849181506
citations	Bioinformatics	PC8	-0.0484078048042519	0.0300430385278497	-1.61128192008202	0.107239808069182	-0.107291078304987	0.0104754686964828
citations	Bioinformatics	PC9	-0.0511677207134556	0.0310077127233245	-1.65016107992275	0.0990309201796911	-0.111941720894136	0.00960627946722479
citations	Bioinformatics	PC10	-0.0409640347485485	0.0314623971663588	-1.30199979778875	0.193031921744869	-0.102629200061907	0.0207011305648098
citations	Bioinformatics	PC11	0.0345419398808421	0.0317996632944096	1.08623602586743	0.277475394555458	-0.0277842548967012	0.0968681346583853
citations	Bioinformatics	PC12	0.0887821437049742	0.0323511293463862	2.74432903885291	0.00610517317814566	0.0253750953268604	0.152189192083088
citations	Bioinformatics	PC13	-0.0290628007877449	0.0331265773579484	-0.877325794141289	0.380390856557121	-0.0939896993404038	0.0358640977649139
citations	Bioinformatics	PC14	0.022557444031968	0.0338541084376893	0.666313338999504	0.505270025768357	-0.0437953892346164	0.0889102772985525
citations	Bioinformatics	PC15	-0.0531064892652969	0.0345046858857524	-1.53910948330718	0.123899396238843	-0.120734430899239	0.0145214523686453
citations	Biophys J	(Intercept)	1.822672612185	0.264469439562903	6.89180804858734	7.51197079419406e-12	1.30432203563022	2.34102318873978
citations	Biophys J	preprintTRUE	0.422431306224036	0.110521673585335	3.82215806656123	0.000136632958542979	0.205812806485688	0.639049805962385
citations	Biophys J	ns(pub_date, df = 3)1	-0.74925943781277	0.104742095326668	-7.15337453844125	1.21178695979814e-12	-0.9545501723183	-0.543968703307241
citations	Biophys J	ns(pub_date, df = 3)2	-2.57601506482584	0.198777053349897	-12.9593180974034	7.72940962060615e-37	-2.96561093034464	-2.18641919930705
citations	Biophys J	ns(pub_date, df = 3)3	-2.44714231472801	0.0953154120811145	-25.6741513391923	1.0215220389263e-124	-2.63395708957859	-2.26032753987743
citations	Biophys J	log2(authors)	0.189912461443856	0.0328809038835377	5.7757676649193	8.95663567975374e-09	0.125467074052999	0.254357848834713
citations	Biophys J	log2(references + 1)	0.267178562118078	0.0435001735953734	6.14201139984633	9.93590321685261e-10	0.181919788549906	0.35243733568625
citations	Biophys J	any_affil_usaTRUE	0.154164538479173	0.0483579013067316	3.1879906760493	0.00145642583194	0.0593847935500362	0.248944283408309
citations	Biophys J	any_affil_nature_indexTRUE	0.0722322598218607	0.0493312501946983	1.46422925704858	0.143300031327791	-0.0244552138720825	0.168919733515804
citations	Biophys J	last_author_pub_age	-0.00252703315216894	0.00304317886351957	-0.830392581409531	0.406423257577528	-0.00849155412318083	0.00343748781884295
citations	Biophys J	PC1	-0.0481016223355412	0.0153812822514638	-3.12728298909953	0.00179156768248931	-0.0782483815844554	-0.017954863086627
citations	Biophys J	PC2	-0.0396750840015071	0.017973073011067	-2.20747358991292	0.027402476146046	-0.0749016597947073	-0.00444850820830692
citations	Biophys J	PC3	0.0208336886390889	0.0191893721558941	1.08568891518891	0.277757107941373	-0.0167767896723992	0.058444166950577
citations	Biophys J	PC4	0.0961934473216027	0.0199310301784223	4.82631587331315	1.50412967428128e-06	0.0571293459971142	0.135257548646091
citations	Biophys J	PC5	-0.0747146746292839	0.0211256693096139	-3.53667727797304	0.000415105973409158	-0.11612022562543	-0.0333091236331375
citations	Biophys J	PC6	0.0188367098430621	0.0211645924447419	0.890010516018319	0.373575152503747	-0.0226451290961005	0.0603185487822247
citations	Biophys J	PC7	0.0294713798021799	0.0221640739120881	1.32969146011133	0.183782730408117	-0.0139694068161965	0.0729121664205564
citations	Biophys J	PC8	0.0118408132599222	0.022343831297635	0.529936567377121	0.596219060308768	-0.0319522913600813	0.0556339178799257
citations	Biophys J	PC9	0.00571577831963208	0.022815953710095	0.250516738956353	0.802215385099104	-0.039002669225087	0.0504342258643512
citations	Biophys J	PC10	-0.100510032763491	0.023035659414542	-4.36323662174138	1.35167677484806e-05	-0.145659095576125	-0.0553609699508581
citations	Biophys J	PC11	0.00760048478639103	0.0236381225543639	0.32153504445673	0.747841028938528	-0.0387293840823061	0.0539303536550882
citations	Biophys J	PC12	0.0535006427823304	0.0244459341349129	2.18852928618189	0.028754850007255	0.00558749230946276	0.101413793255198
citations	Biophys J	PC13	0.00260076594999953	0.024339119415996	0.106855383941716	0.914915213889111	-0.0451030315207721	0.0503045634207712
citations	Biophys J	PC14	-0.0178369824723888	0.0249514031802859	-0.714868913123163	0.474779615812047	-0.0667408340694874	0.0310668691247098
citations	Biophys J	PC15	0.028568318756071	0.0253100663260503	1.12873346075222	0.259155614483669	-0.0210384996893076	0.0781751372014497
citations	Cell	(Intercept)	5.44227863115326	0.390974552590811	13.9197771187146	1.85167911601771e-41	4.67598258920361	6.20857467310291
citations	Cell	preprintTRUE	0.431687470591305	0.123731105632493	3.48891629460991	0.000499344512858416	0.189178959784298	0.674195981398311
citations	Cell	ns(pub_date, df = 3)1	-0.949344241847644	0.114317525113928	-8.30445061596231	2.25391852806672e-16	-1.1734024738727	-0.725286009822593
citations	Cell	ns(pub_date, df = 3)2	-3.28453197387925	0.226786869520871	-14.4829018576712	1.58443308918999e-44	-3.72902607030674	-2.84003787745176
citations	Cell	ns(pub_date, df = 3)3	-3.01463757547469	0.0944222595901413	-31.9271916236736	3.12776837858415e-170	-3.19970180361026	-2.82957334733912
citations	Cell	log2(authors)	0.279555328264956	0.0264858281104391	10.5549023084829	3.75592625187965e-25	0.227644059067777	0.331466597462135
citations	Cell	log2(references + 1)	0.147513199347149	0.063108076015516	2.33746944386137	0.019548851106804	0.0238236432231221	0.271202755471177
citations	Cell	any_affil_usaTRUE	0.027928678966516	0.065859873104977	0.424062143606005	0.671582751460355	-0.101154300345617	0.157011658278649
citations	Cell	any_affil_nature_indexTRUE	-0.100896906241586	0.0912873961547849	-1.10526655914807	0.269225583986933	-0.279816914947405	0.0780231024642323
citations	Cell	last_author_pub_age	-0.00877438426645392	0.00302527475107623	-2.90035946762603	0.00378295890211017	-0.0147038138219017	-0.00284495471100613
citations	Cell	PC1	-0.0734601970573959	0.0156532589609893	-4.692965039451	2.94422889225945e-06	-0.104140020861614	-0.042780373253178
citations	Cell	PC2	0.0599059297559024	0.0179315776208276	3.34080642666497	0.00085637126351268	0.024760683433096	0.0950511760787088
citations	Cell	PC3	0.0957969108047759	0.0219515726481126	4.36401128704611	1.36643713948931e-05	0.0527726190104607	0.138821202599091
citations	Cell	PC4	0.00817622246054855	0.0230593691323605	0.354572686425943	0.722960772794308	-0.0370193105450927	0.0533717554661898
citations	Cell	PC5	-0.0179609295647999	0.0239815071782108	-0.748949156169755	0.454008081332923	-0.0649638199290818	0.029041960799482
citations	Cell	PC6	-0.0432511556498502	0.025289782452238	-1.71022252688547	0.0874364633661953	-0.0928182184330897	0.00631590713338936
citations	Cell	PC7	0.0552890798469774	0.0257387724504854	2.14808534297193	0.0318705351080142	0.00484201283775418	0.105736146856201
citations	Cell	PC8	-0.0133820369798284	0.026148185220094	-0.511776892629044	0.608884295901979	-0.0646315382722951	0.0378674643126383
citations	Cell	PC9	-0.0631728575162582	0.0263932895838738	-2.39351966019637	0.016812773469937	-0.114902754534187	-0.0114429604983293
citations	Cell	PC10	0.035750566748111	0.0271444239815709	1.31705011579479	0.188027792928405	-0.0174515266368533	0.0889526601330752
citations	Cell	PC11	0.00815738429446922	0.0275965019339172	0.29559486611756	0.767581384352889	-0.0459307655952983	0.0622455341842368
citations	Cell	PC12	-0.0755284669048713	0.0284960615616824	-2.65048791887899	0.00812412631187191	-0.131379721267005	-0.0196772125427376
citations	Cell	PC13	0.0105974388282899	0.0295989706082118	0.358034033296745	0.720369423438531	-0.0474154775432648	0.0686103551998445
citations	Cell	PC14	0.0689366687620352	0.0305703509662722	2.2550172498213	0.0242793481869689	0.00901988187339242	0.128853455650678
citations	Cell	PC15	0.0386663531192207	0.0335807626039577	1.15144356830847	0.249737679910444	-0.0271507321579257	0.104483438396367
citations	Cell Rep	(Intercept)	3.81297554169262	0.25099596596038	15.1913817702333	2.43353821456217e-50	3.32103248814544	4.30491859523981
citations	Cell Rep	preprintTRUE	0.623654917000561	0.118746561091021	5.25198297340603	1.60557321775734e-07	0.390915933974175	0.856393900026948
citations	Cell Rep	ns(pub_date, df = 3)1	-0.967061604435392	0.0759112544130469	-12.7393706231415	2.81257167185802e-36	-1.11584492910622	-0.818278279764563
citations	Cell Rep	ns(pub_date, df = 3)2	-2.74999308945246	0.186449056794553	-14.7493000862035	1.20176798715403e-47	-3.11542652572125	-2.38455965318368
citations	Cell Rep	ns(pub_date, df = 3)3	-1.77735396263198	0.0609263065412345	-29.1721928265762	1.16340119679022e-165	-1.89676732916385	-1.65794059610012
citations	Cell Rep	log2(authors)	0.216573394562714	0.0216155660730333	10.0193256022521	2.80545219518537e-23	0.174207663554123	0.258939125571306
citations	Cell Rep	log2(references + 1)	0.147811956469218	0.0425802627419889	3.47137257853176	0.000524828713859072	0.0643561750426669	0.231267737895769
citations	Cell Rep	any_affil_usaTRUE	0.0926763178304321	0.0375014177081257	2.47127504756577	0.0135161989139531	0.0191748897533131	0.166177745907551
citations	Cell Rep	any_affil_nature_indexTRUE	0.063284157456147	0.0441142528308406	1.43455127073816	0.151515134682434	-0.0231781892971947	0.149746504209489
citations	Cell Rep	last_author_pub_age	-0.00506022664859814	0.00218785632599071	-2.31286972023026	0.0207944873041674	-0.00934834625088806	-0.000772107046308216
citations	Cell Rep	PC1	0.0437682639449529	0.0114464455478347	3.8237428171082	0.000134008372717946	0.0213336429201981	0.0662028849697077
citations	Cell Rep	PC2	-0.000127912219872246	0.014711593754701	-0.00869465416222308	0.993063312428952	-0.0289621061342706	0.0287062816945261
citations	Cell Rep	PC3	-0.0122791952560938	0.0159467001660067	-0.7700148073436	0.441349349254515	-0.0435341532537257	0.0189757627415382
citations	Cell Rep	PC4	-0.0415128443288606	0.0163207922539922	-2.54355570996906	0.0110208695990883	-0.0735010093458455	-0.00952467931187561
citations	Cell Rep	PC5	-0.0420852793374751	0.0167077174787756	-2.51891255588547	0.0118213429822762	-0.0748318038597457	-0.00933875481520451
citations	Cell Rep	PC6	0.00141689418256092	0.0172051438687112	0.0823529401075015	0.934371334780904	-0.0323045681489431	0.0351383565140649
citations	Cell Rep	PC7	-0.0159149401569892	0.0174363731272105	-0.912743724906471	0.361447795522434	-0.0500896035073237	0.0182597231933454
citations	Cell Rep	PC8	-0.0187380850255746	0.017655645888099	-1.06130838511013	0.288631842498299	-0.0533425150900412	0.0158663450388921
citations	Cell Rep	PC9	-0.0407087438339423	0.0179564403686395	-2.26708317451599	0.0234532281967537	-0.0759027202470168	-0.00551476742086777
citations	Cell Rep	PC10	-0.027730586249586	0.0181325060416033	-1.52933004329135	0.126283921232999	-0.0632696450405835	0.00780847254141151
citations	Cell Rep	PC11	0.0422397470246346	0.0182725649809038	2.31164847785619	0.0208618379295601	0.00642617775689533	0.0780533162923738
citations	Cell Rep	PC12	-0.0787432243040148	0.0185010082425252	-4.25615854399875	2.14089613445462e-05	-0.115004534137043	-0.0424819144709868
citations	Cell Rep	PC13	0.0758368144009249	0.0188140630242998	4.03085789087535	5.69008527649985e-05	0.0389619284704306	0.112711700331419
citations	Cell Rep	PC14	0.0210024209377496	0.019774887943504	1.06207534514241	0.288283603251714	-0.0177556472298337	0.0597604891053329
citations	Cell Rep	PC15	-0.0499877432305002	0.0200976592934469	-2.48724204648047	0.012925599277237	-0.0893784316192129	-0.0105970548417876
citations	Development	(Intercept)	3.81481837448163	0.142313996314594	26.8056443728045	5.95011616557813e-128	3.53588806720906	4.0937486817542
citations	Development	preprintTRUE	0.53292243033836	0.1130252480312	4.7150741946724	2.65886685129289e-06	0.311397014853501	0.75444784582322
citations	Development	ns(pub_date, df = 3)1	-1.0833990696111	0.120828208313588	-8.96644156800981	9.64025733305168e-19	-1.32021800622224	-0.846580132999966
citations	Development	ns(pub_date, df = 3)2	-3.62915334107344	0.256090486139666	-14.171371204685	1.10382534489205e-42	-4.13108147069054	-3.12722521145634
citations	Development	ns(pub_date, df = 3)3	-2.86613840237794	0.0992950710322398	-28.8648607889846	5.89116477609859e-144	-3.06075316544347	-2.6715236393124
citations	Development	log2(authors)	0.166248186020841	0.0341704291871449	4.86526479109558	1.27324129333121e-06	0.0992753754777607	0.233220996563921
citations	Development	log2(references + 1)	0.0616066748850758	0.0185751344282075	3.31662067497731	0.000934636946902623	0.0252000803977991	0.0980132693723524
citations	Development	any_affil_usaTRUE	0.0603600958456153	0.0556514908631075	1.08460878422988	0.278282908046208	-0.0487148219320352	0.169435013623266
citations	Development	any_affil_nature_indexTRUE	0.0230031675540649	0.059292451410949	0.387961148622996	0.698104146587089	-0.0932079017664861	0.139214236874616
citations	Development	last_author_pub_age	-0.00525567425084678	0.00343782300559559	-1.52877976623356	0.126546407571264	-0.0119936835270374	0.00148233502534381
citations	Development	PC1	-0.0749094522638381	0.0156874126579913	-4.77513111288485	1.98563860201818e-06	-0.105656216084119	-0.0441626884435573
citations	Development	PC2	0.0412917940088295	0.0171740362472885	2.40431506107651	0.0163328645318649	0.00763130149495868	0.0749522865227003
citations	Development	PC3	0.0952046842602761	0.017486040012036	5.44461091217591	6.13018136016847e-08	0.0609326756044591	0.129476692916093
citations	Development	PC4	0.00544146360021879	0.0195844960933233	0.277845474006037	0.781172271968011	-0.0329434433980602	0.0438263705984978
citations	Development	PC5	0.0470051426623206	0.0198778571590905	2.36469868387319	0.0181814017576104	0.0080452585406716	0.0859650267839697
citations	Development	PC6	-0.00593018691356867	0.0209349696136907	-0.283267041844214	0.777014290433666	-0.0469619733738429	0.0351015995467055
citations	Development	PC7	0.0310296855892175	0.0212855917291655	1.45777885736203	0.145127232369117	-0.0106893075895704	0.0727486787680055
citations	Development	PC8	0.0404575992622515	0.0221032809337737	1.83038886324032	0.0674056806546048	-0.00286403530811571	0.0837792338326187
citations	Development	PC9	-0.0295196578163446	0.0226033868264726	-1.30598383520879	0.191773981566488	-0.0738214819248579	0.0147821662921688
citations	Development	PC10	-0.00294124171516433	0.0234693292403815	-0.125322785540185	0.900286123406627	-0.0489402817676248	0.0430577983372961
citations	Development	PC11	0.00987625635188391	0.0238487204901338	0.414121015673344	0.678849328936623	-0.0368663768861408	0.0566188895899086
citations	Development	PC12	-0.0223383528674556	0.02420457962019	-0.922897782898168	0.356220527690349	-0.0697784571839602	0.0251017514490491
citations	Development	PC13	-0.00696046247685513	0.0248707033788648	-0.279865927827765	0.779621979194475	-0.0557061453696088	0.0417852204158985
citations	Development	PC14	0.0192284414514391	0.0250443886747923	0.767774438463051	0.442751512055043	-0.0298576583659767	0.0683145412688549
citations	Development	PC15	-0.019880785470304	0.0255703454884728	-0.777493815219129	0.436999690580123	-0.0699977416999569	0.030236170759349
citations	Elife	(Intercept)	1.98001930777603	0.170823293224098	11.5910381447717	1.26508149737804e-30	1.64521180533627	2.31482681021579
citations	Elife	preprintTRUE	0.392872793425263	0.0458137403956129	8.57543588523246	1.34740279859623e-17	0.303079512252794	0.482666074597732
citations	Elife	ns(pub_date, df = 3)1	-1.29093586962025	0.0677593895653016	-19.0517635696251	7.82285552031923e-78	-1.42374183278266	-1.15812990645784
citations	Elife	ns(pub_date, df = 3)2	-3.02440147480853	0.158796704856751	-19.0457445419715	8.69967411347616e-78	-3.3356372971914	-2.71316565242566
citations	Elife	ns(pub_date, df = 3)3	-2.94177585660357	0.0589699375568201	-49.8860263124586	0	-3.05735481038551	-2.82619690282163
citations	Elife	log2(authors)	0.167879018407223	0.0185843662540202	9.03334642207166	2.43876373747512e-19	0.131454329873842	0.204303706940604
citations	Elife	log2(references + 1)	0.384415129561544	0.0276689807899623	13.8933606727213	5.51871351125902e-43	0.330184923724287	0.4386453353988
citations	Elife	any_affil_usaTRUE	0.0701091305658984	0.0346440725351297	2.02369771899093	0.0430613981890147	0.00220799611925099	0.138010265012546
citations	Elife	any_affil_nature_indexTRUE	0.155328065504831	0.0406248924910904	3.82347019229395	0.000133400948734112	0.0757047393464817	0.23495139166318
citations	Elife	last_author_pub_age	0.00130366006370162	0.00193305102027513	0.674405408873309	0.500088923007463	-0.00248505031631604	0.00509237044371928
citations	Elife	PC1	-0.0778725993326783	0.0109996618979636	-7.07954481283602	1.67498393437919e-12	-0.0994315404948045	-0.0563136581705521
citations	Elife	PC2	0.0380886929849776	0.013446840550218	2.83253845709951	0.00463893426338291	0.0117333698006976	0.0644440161692576
citations	Elife	PC3	0.00951754088370096	0.0139925575703908	0.68018593711851	0.496422408191314	-0.0179073680058682	0.0369424497732702
citations	Elife	PC4	-0.0789638900994028	0.0154325395713781	-5.11671392347198	3.24105318374354e-07	-0.109211111849293	-0.0487166683495125
citations	Elife	PC5	-0.00217523127316813	0.0156178583148367	-0.139278461189631	0.889236463513707	-0.0327856710858974	0.0284352085395612
citations	Elife	PC6	-0.00685205264168173	0.0164429258553158	-0.416717359305403	0.676905418614998	-0.0390795951185631	0.0253754898351997
citations	Elife	PC7	-0.00220380662600469	0.0169957063376696	-0.12966843402796	0.896834665933607	-0.0355147789396563	0.0311071656876469
citations	Elife	PC8	0.0023133840794905	0.017229392059792	0.134269628984137	0.893195489807553	-0.0314556038332222	0.0360823719922032
citations	Elife	PC9	-0.0101508974434567	0.0175168376157555	-0.579493722903869	0.562285654523238	-0.0444832682933739	0.0241814734064605
citations	Elife	PC10	-0.0266992075931838	0.0183993494694514	-1.45109519429003	0.146824416312761	-0.0627612698922747	0.0093628547059071
citations	Elife	PC11	0.00690299631156914	0.0204732646367129	0.337171254026121	0.736003836790374	-0.0332238650223457	0.047029857645484
citations	Elife	PC12	-0.0249336847978247	0.0250460149230808	-0.995515049974975	0.319540397680436	-0.0740229720033157	0.0241556024076663
citations	Elife	PC13	-0.0750257331665164	0.0267821295256578	-2.80133561054734	0.00511131908993996	-0.127517742466092	-0.0225337238669404
citations	Evolution	(Intercept)	2.43398779514931	0.388621992987659	6.26312416453127	6.25421724685046e-10	1.67230268529332	3.1956729050053
citations	Evolution	preprintTRUE	0.23901194522532	0.138981747594723	1.71973621976815	0.0858801623141114	-0.0333872745687737	0.511411165019414
citations	Evolution	ns(pub_date, df = 3)1	-0.956076696300428	0.148733541092438	-6.42811762080097	2.25802228233915e-10	-1.24758908013472	-0.66456431246614
citations	Evolution	ns(pub_date, df = 3)2	-3.15387686780959	0.292353185148903	-10.7878998007264	2.25391429231724e-25	-3.72687858146701	-2.58087515415217
citations	Evolution	ns(pub_date, df = 3)3	-2.41231276848444	0.141053323237414	-17.1021335273623	7.26892193437917e-56	-2.68877220192946	-2.13585333503943
citations	Evolution	log2(authors)	0.0217094226992519	0.045186508272394	0.480440368801742	0.631050053516352	-0.0668545061017616	0.110273351500265
citations	Evolution	log2(references + 1)	0.296823220579172	0.0596326013857821	4.97753265296828	7.942082626242e-07	0.179945469558606	0.413700971599738
citations	Evolution	any_affil_usaTRUE	0.0304993799300326	0.0706595186548023	0.431638659740003	0.666124260001064	-0.107990731798316	0.168989491658381
citations	Evolution	any_affil_nature_indexTRUE	0.0265632723585638	0.0711101170517381	0.373551239400112	0.70884050855007	-0.11280999599927	0.165936540716398
citations	Evolution	last_author_pub_age	0.00123745522082357	0.00489915968801527	0.252585198202609	0.800655831745669	-0.00836472132219684	0.010839631763844
citations	Evolution	PC1	-0.0669018597298964	0.0239174544066479	-2.79719817136146	0.00528274724321469	-0.113779208968805	-0.0200245104909878
citations	Evolution	PC2	0.0042615095605979	0.0256627585985886	0.16605812443064	0.868154574801332	-0.0460365730365813	0.0545595921577771
citations	Evolution	PC3	0.0650890839353984	0.0270486102578682	2.40637442422628	0.0163451279823352	0.0120747819981162	0.118103385872681
citations	Evolution	PC4	0.0679900063419068	0.0296445094532444	2.29351092650534	0.0220857758972572	0.0098878354741907	0.126092177209623
citations	Evolution	PC5	0.0376641222218149	0.0298718360963975	1.2608572871206	0.207740198740491	-0.0208836006792077	0.0962118451228375
citations	Evolution	PC6	0.0180403734298113	0.0317989101720026	0.567326783598231	0.570656686448361	-0.0442843452549382	0.0803650921145608
citations	Evolution	PC7	0.00478479840084016	0.032404268249927	0.147659510899492	0.882649942709138	-0.0587264003143915	0.0682959971160718
citations	Evolution	PC8	-0.0161273166478368	0.0334933177952513	-0.481508483167448	0.630291255689207	-0.0817730132492838	0.0495183799536103
citations	Evolution	PC9	-0.039428538776865	0.0335556770915886	-1.17501842294067	0.240348691580844	-0.105196457353234	0.0263393797995045
citations	Evolution	PC10	0.0355396305983936	0.0345153160419086	1.02967710205062	0.303483260408962	-0.0321091457587648	0.103188406955552
citations	Evolution	PC11	-0.0270045034247702	0.0350221234122104	-0.771069849389976	0.440900846623531	-0.0956466039748195	0.0416375971252791
citations	Evolution	PC12	0.0304869275909568	0.0357475910464439	0.852838658452473	0.394012609594847	-0.0395770633941396	0.100550918576053
citations	Evolution	PC13	-0.0193417006200631	0.0368495739732234	-0.524882611509096	0.599815101463777	-0.0915655384532255	0.0528821372130993
citations	Evolution	PC14	0.0395942989981218	0.0378424588931437	1.04629297768216	0.295752418463085	-0.0345755575188772	0.113764155515121
citations	Evolution	PC15	0.0520004130426939	0.0381676893141853	1.3624197319005	0.173461765259445	-0.0228068833862236	0.126807709471611
citations	G3 (Bethesda)	(Intercept)	2.60713718274676	0.243657536253027	10.7000063402076	1.31628227244747e-25	2.12957718712906	3.08469717836445
citations	G3 (Bethesda)	preprintTRUE	0.383324950645002	0.0831401885838397	4.6105855323921	4.43527471538787e-06	0.220373175352808	0.546276725937196
citations	G3 (Bethesda)	ns(pub_date, df = 3)1	-1.00300537333178	0.134315364764353	-7.46754010675911	1.54503256316959e-13	-1.26625865084027	-0.739752095823292
citations	G3 (Bethesda)	ns(pub_date, df = 3)2	-2.87507290970862	0.292141757649641	-9.84136240173044	4.76967495131773e-22	-3.44766023308215	-2.3024855863351
citations	G3 (Bethesda)	ns(pub_date, df = 3)3	-2.31131372730978	0.120700825931217	-19.1491127710005	1.01609437121125e-71	-2.54788299903921	-2.07474445558036
citations	G3 (Bethesda)	log2(authors)	0.154779254253387	0.0351214586054634	4.40697113386143	1.13984552578584e-05	0.0859424603021639	0.223616048204609
citations	G3 (Bethesda)	log2(references + 1)	0.0575626406887288	0.033898074602149	1.69810944616541	0.0897406539444431	-0.00887636467673505	0.124001646054193
citations	G3 (Bethesda)	any_affil_usaTRUE	0.0109201284133362	0.064953554137786	0.168122107531966	0.866514924150178	-0.116386498364597	0.138226755191269
citations	G3 (Bethesda)	any_affil_nature_indexTRUE	0.243129588775279	0.0650631021713495	3.7368274899493	0.000194926631487849	0.115608251796984	0.370650925753574
citations	G3 (Bethesda)	last_author_pub_age	-0.000613452042154545	0.0037982498389718	-0.161509133985933	0.871719007200927	-0.00805788493082434	0.00683098084651525
citations	G3 (Bethesda)	PC1	0.116673993287516	0.016325577958239	7.14669909916632	1.5214312514397e-12	0.0846764484625666	0.148671538112465
citations	G3 (Bethesda)	PC2	-0.0518523687260161	0.0186708814631322	-2.77717840094505	0.00556678058098203	-0.0884466239533718	-0.0152581134986605
citations	G3 (Bethesda)	PC3	-0.0309688566195437	0.018838327373899	-1.6439281473817	0.100447221734028	-0.0678912998013607	0.00595358656227335
citations	G3 (Bethesda)	PC4	0.00979271891036198	0.0215343413086639	0.454748941237506	0.649370309027314	-0.0324138144854124	0.0519992523061363
citations	G3 (Bethesda)	PC5	-0.0360172060894811	0.0225229638718615	-1.59913261391314	0.110048587399699	-0.0801614041034265	0.00812699192446432
citations	G3 (Bethesda)	PC6	-0.0748821822139559	0.0228549945859902	-3.27640341073884	0.00108078901225087	-0.119677148469355	-0.0300872159585573
citations	G3 (Bethesda)	PC7	0.0190316880794419	0.0253915833105664	0.749527425945198	0.453683050548947	-0.0307349007197166	0.0687982768786004
citations	G3 (Bethesda)	PC8	0.0131316869427418	0.0260150183342969	0.504773311092756	0.613808703547115	-0.0378568120496293	0.0641201859351129
citations	G3 (Bethesda)	PC9	0.0753102161014145	0.0266568597255702	2.82517208991329	0.00480207357994073	0.0230637310983607	0.127556701104468
citations	G3 (Bethesda)	PC10	0.037505216576912	0.0272306266082589	1.37731742704507	0.168665319332824	-0.0158658308517334	0.0908762640055575
citations	G3 (Bethesda)	PC11	0.0560869649044347	0.0282757211047729	1.9835732817073	0.0475260208546456	0.000667569902180795	0.111506359906689
citations	G3 (Bethesda)	PC12	0.016084044969084	0.0285123739411385	0.564107534584394	0.57278404291237	-0.0397991810692859	0.0719672710074539
citations	G3 (Bethesda)	PC13	0.00591273539511344	0.0291866618630979	0.202583475385008	0.839494192250283	-0.0512920706855072	0.0631175414757341
citations	G3 (Bethesda)	PC14	-0.0322015083967411	0.0297826524919543	-1.08121694014461	0.279813080627953	-0.0905744346450437	0.0261714178515614
citations	G3 (Bethesda)	PC15	0.00873362032095538	0.0298928315056835	0.292164371223745	0.770210343034018	-0.0498552528261085	0.0673224934680193
citations	Genetics	(Intercept)	1.59716922661554	0.35042065671976	4.55786266017084	5.70611218108432e-06	0.910357360005934	2.28398109322514
citations	Genetics	preprintTRUE	0.494355061773113	0.0902493881354319	5.47765554965607	5.26573277418719e-08	0.31746951140089	0.671240612145336
citations	Genetics	ns(pub_date, df = 3)1	-1.25373533957115	0.144852596610511	-8.65524932868327	1.59014557591232e-17	-1.53764121199486	-0.969829467147442
citations	Genetics	ns(pub_date, df = 3)2	-3.14652831483004	0.313608679091072	-10.0332947543084	8.67837540356961e-23	-3.76119003108772	-2.53186659857236
citations	Genetics	ns(pub_date, df = 3)3	-2.49308441744854	0.128579453960299	-19.3894462969047	6.62732816591166e-73	-2.74509551636255	-2.24107331853453
citations	Genetics	log2(authors)	0.14599563958812	0.040949711317494	3.56524221761117	0.00037808449653354	0.0657356802285191	0.22625559894772
citations	Genetics	log2(references + 1)	0.321118564199669	0.0563170954700606	5.70197311348173	1.49611567534485e-08	0.210739085364446	0.431498043034892
citations	Genetics	any_affil_usaTRUE	0.0476159547809731	0.0734779695084453	0.648030356575112	0.517091599497832	-0.096398219112712	0.191630128674658
citations	Genetics	any_affil_nature_indexTRUE	0.320404258478928	0.0739136905798626	4.33484319299057	1.58315255399089e-05	0.17553608697796	0.465272429979896
citations	Genetics	last_author_pub_age	0.00120137794198913	0.00415329750284293	0.289258821735449	0.772434219460229	-0.00693893558066316	0.00934169146464141
citations	Genetics	PC1	-0.127857175664486	0.0189601992317368	-6.7434510630284	2.41753815390634e-11	-0.165018483298394	-0.0906958680305775
citations	Genetics	PC2	0.0580358541579427	0.020883860889159	2.7789810737568	0.00553965089948175	0.0171042389570464	0.098967469358839
citations	Genetics	PC3	0.0186952991225619	0.023755646321561	0.786983392053356	0.431449885835241	-0.027864912097169	0.0652555103422927
citations	Genetics	PC4	-0.00310991111310128	0.0273714465791803	-0.113618807252474	0.909559337885197	-0.0567569606130567	0.0505371383868542
citations	Genetics	PC5	0.0753745394386666	0.0274909926781472	2.74179038644109	0.00620304428981777	0.0214931838902437	0.12925589498709
citations	Genetics	PC6	-0.039792668418537	0.0294799217617221	-1.3498227281663	0.177332169716589	-0.0975722533385709	0.017986916501497
citations	Genetics	PC7	0.0123865716090472	0.030573271096094	0.405143812388126	0.685445365463573	-0.0475359386288764	0.0723090818469708
citations	Genetics	PC8	-0.03674680290587	0.0315586438451254	-1.16439740206219	0.244498758005514	-0.0986006082432425	0.0251070024315025
citations	Genetics	PC9	-0.0154325271941159	0.0319228372133396	-0.483432192789778	0.628878736224402	-0.0780001384165966	0.0471350840283648
citations	Genetics	PC10	0.034226013242676	0.0327787524582724	1.0441524059296	0.296629101568783	-0.0300191610336917	0.0984711875190437
citations	Genetics	PC11	-0.101182603925127	0.0340598425724158	-2.97073022900793	0.00303116221947258	-0.167938668686166	-0.0344265391640876
citations	Genetics	PC12	-0.0864771769016326	0.0346837116062897	-2.49330803701961	0.0127922988209054	-0.154456002500134	-0.0184983513031308
citations	Genetics	PC13	0.042607757768798	0.0351757239622784	1.21128303754287	0.226029880623932	-0.0263353943273902	0.111550909864986
citations	Genetics	PC14	0.0210316755370253	0.0359010046616556	0.585824149915458	0.558105909066292	-0.0493330006086243	0.0913963516826748
citations	Genetics	PC15	-0.0555838547210296	0.0361387728498181	-1.53806702158979	0.124300774808558	-0.126414547952147	0.0152468385100878
citations	Genome Biol	(Intercept)	5.43259554032298	0.477424563008693	11.3789611202389	1.29361975321066e-27	4.49686059149117	6.36833048915479
citations	Genome Biol	preprintTRUE	0.514797925405986	0.114529400165277	4.49489759540416	8.1618979944355e-06	0.290324425911067	0.739271424900904
citations	Genome Biol	ns(pub_date, df = 3)1	-1.22242045556247	0.19857856707971	-6.15585293790433	1.26667099149067e-09	-1.61162729514027	-0.833213615984665
citations	Genome Biol	ns(pub_date, df = 3)2	-3.12493572211784	0.385221284290063	-8.11205364178382	2.2780864964523e-15	-3.87995556540463	-2.36991587883106
citations	Genome Biol	ns(pub_date, df = 3)3	-3.30382612745819	0.151057400612794	-21.8713291375039	5.82086843730701e-81	-3.5998931922575	-3.00775906265887
citations	Genome Biol	log2(authors)	0.244205118624611	0.0438555708764723	5.56839447632463	3.68483246961645e-08	0.158249779185282	0.33016045806394
citations	Genome Biol	log2(references + 1)	-0.0876617839949218	0.0796724852982076	-1.10027676012379	0.271595260515181	-0.243816985738206	0.068493417748362
citations	Genome Biol	any_affil_usaTRUE	-0.0275989209537867	0.0927198526798445	-0.297659240778605	0.766052852503767	-0.209326492858142	0.154128650950568
citations	Genome Biol	any_affil_nature_indexTRUE	-0.0176652954759878	0.107554609777181	-0.164244893943501	0.869586460704818	-0.228468457010522	0.193137866058547
citations	Genome Biol	last_author_pub_age	-0.00605312730996276	0.00642344471638051	-0.942349094174751	0.346343753433421	-0.0186428476107526	0.00653659299082713
citations	Genome Biol	PC1	0.0624401208992402	0.0269429160635233	2.31749676805677	0.0207683926231257	0.00963297577624873	0.115247266022232
citations	Genome Biol	PC2	-0.00164057853640461	0.0292641405730357	-0.056061053025294	0.955309399369416	-0.0589972400980719	0.0557160830252627
citations	Genome Biol	PC3	-0.00578976324714189	0.0285385496827894	-0.202875174509428	0.839292406475784	-0.0617242927964162	0.0501447663021324
citations	Genome Biol	PC4	0.0285168171984832	0.0326634218575552	0.87305051267576	0.382939266374785	-0.0355023132541635	0.0925359476511299
citations	Genome Biol	PC5	0.110866718849342	0.0332919160207474	3.3301393281255	0.000914224265636748	0.0456157624723454	0.176117675226339
citations	Genome Biol	PC6	0.0893481760839335	0.0358059826046176	2.49534210722682	0.012816114300547	0.0191697397478153	0.159526612420052
citations	Genome Biol	PC7	0.0144399978988197	0.0370937699409618	0.389283643097001	0.697186445298141	-0.05826245523628	0.0871424510339193
citations	Genome Biol	PC8	-0.0078420440103585	0.0373338647228661	-0.210051760474597	0.83368928282125	-0.0810150742708666	0.0653309862501496
citations	Genome Biol	PC9	0.0440707120197642	0.037978517621499	1.16041159001994	0.246282602626019	-0.0303658147045937	0.118507238744122
citations	Genome Biol	PC10	-0.0836360424502309	0.039221366033258	-2.13241023730054	0.0333255822777057	-0.160508507299879	-0.0067635776005827
citations	Genome Biol	PC11	-0.054367715886706	0.0400993596182338	-1.35582504070674	0.175598404195875	-0.132961016541564	0.0242255847681521
citations	Genome Biol	PC12	-0.0334199139382874	0.0407073542823556	-0.820979759737741	0.411941345314849	-0.113204862237617	0.0463650343610419
citations	Genome Biol	PC13	-0.131315405583242	0.0420955339906631	-3.11946168950768	0.00188726945301322	-0.213821136114923	-0.0488096750515607
citations	Genome Biol	PC14	0.063659130601079	0.0422059188737275	1.50829865336034	0.131935827924689	-0.0190629503258462	0.146381211528004
citations	Genome Biol	PC15	0.0697471700610419	0.0429090399766257	1.62546563845372	0.104520006784204	-0.0143530029043338	0.153847343026418
citations	Genome Biol Evol	(Intercept)	0.915370454528249	0.34632388775104	2.64310515937115	0.00835164569951598	0.236588107550318	1.59415280150618
citations	Genome Biol Evol	preprintTRUE	0.297908218882418	0.110930279826399	2.68554464433544	0.00736876389551653	0.0804888656277257	0.51532757213711
citations	Genome Biol Evol	ns(pub_date, df = 3)1	-1.29849171981939	0.140794521211703	-9.22260119672514	1.8598407634618e-19	-1.57444391061489	-1.02253952902389
citations	Genome Biol Evol	ns(pub_date, df = 3)2	-3.53550045626111	0.301499408612983	-11.7263926736236	9.80868143961434e-30	-4.12642843850268	-2.94457247401954
citations	Genome Biol Evol	ns(pub_date, df = 3)3	-2.67034477057004	0.12470661296049	-21.4130165768841	3.65329410792716e-83	-2.91476524060658	-2.4259243005335
citations	Genome Biol Evol	log2(authors)	0.21470661716046	0.0397155200514479	5.40611370271186	8.168669477492e-08	0.136865628232344	0.292547606088577
citations	Genome Biol Evol	log2(references + 1)	0.475208837199526	0.0524962258133254	9.05224765851455	7.89946950843825e-19	0.372318125281126	0.578099549117926
citations	Genome Biol Evol	any_affil_usaTRUE	-0.199419352723495	0.0809142420088383	-2.46457666502903	0.0138954386686783	-0.358008352897176	-0.0408303525498137
citations	Genome Biol Evol	any_affil_nature_indexTRUE	0.130888042517396	0.0673432991130457	1.94359415474553	0.0522425632080747	-0.00110239834428191	0.262878483379073
citations	Genome Biol Evol	last_author_pub_age	-0.00558995650305571	0.00428100443365268	-1.30575816719867	0.191954276361431	-0.0139805710106712	0.00280065800455983
citations	Genome Biol Evol	PC1	0.0563360599256187	0.0243863438196337	2.31014785743576	0.0210957839214664	0.00853970432452569	0.104132415526712
citations	Genome Biol Evol	PC2	0.023437093502948	0.0258425606865864	0.906918388900721	0.364682377811281	-0.027213394711052	0.074087581716948
citations	Genome Biol Evol	PC3	-0.059849819631496	0.0264296667563541	-2.26449391826355	0.0237708033323804	-0.111651014597345	-0.0080486246656465
citations	Genome Biol Evol	PC4	0.0131431799586945	0.0275941385098424	0.476303326302669	0.633968983706183	-0.0409403377050063	0.0672266976223952
citations	Genome Biol Evol	PC5	-0.0418702157573854	0.0285619970463823	-1.46594146373559	0.142998655691062	-0.0978507012948342	0.0141102697800634
citations	Genome Biol Evol	PC6	-0.01381054581378	0.0304728484158321	-0.453208233943918	0.650503398738943	-0.0735362312151592	0.0459151395875993
citations	Genome Biol Evol	PC7	-0.0197730203228985	0.0310358660913686	-0.637102256617791	0.524213368016343	-0.0806022000909888	0.0410561594451918
citations	Genome Biol Evol	PC8	0.0197712669576976	0.0308373073334268	0.641147644439956	0.521583045435787	-0.0406687447960118	0.080211278711407
citations	Genome Biol Evol	PC9	0.0676743778564408	0.0314539242367816	2.15154005417561	0.0316877856642547	0.0060258191798973	0.129322936532984
citations	Genome Biol Evol	PC10	0.00955407976950608	0.0314709751867841	0.303583848698728	0.76151213856769	-0.0521278981549443	0.0712360576939565
citations	Genome Biol Evol	PC11	-0.0620878410202051	0.0316847620872696	-1.95954891026785	0.050343730568517	-0.124188833569974	1.31515295633752e-05
citations	Genome Biol Evol	PC12	-0.0849358965669574	0.0331764054697576	-2.56012956691109	0.0106186449234347	-0.14996045642418	-0.0199113367097348
citations	Genome Biol Evol	PC13	-0.0761557964744711	0.0334401164654276	-2.27737832651407	0.0229875305448007	-0.141697220385534	-0.0106143725634082
citations	Genome Biol Evol	PC14	-0.0446681482137557	0.0340465753616514	-1.31197184266785	0.189849936524786	-0.111398209719521	0.0220619132920099
citations	Genome Biol Evol	PC15	0.00114587360151251	0.0345855701457774	0.0331315515887892	0.973576715569844	-0.0666405982689948	0.0689323454720199
citations	Genome Res	(Intercept)	3.86683589810102	0.595864276196008	6.48945750328727	1.76420461525289e-10	2.69896337708282	5.03470841911922
citations	Genome Res	preprintTRUE	0.468676521476626	0.108787759520392	4.30817330500105	1.91374554354105e-05	0.255456430857854	0.681896612095398
citations	Genome Res	ns(pub_date, df = 3)1	-1.12022742512127	0.19573940829498	-5.72305513171412	1.62995047829892e-08	-1.50386961573461	-0.736585234507929
citations	Genome Res	ns(pub_date, df = 3)2	-3.66246792134258	0.396171744226865	-9.24464698634664	3.7437267422824e-19	-4.43895027171965	-2.88598557096551
citations	Genome Res	ns(pub_date, df = 3)3	-3.19175572312945	0.158998262242821	-20.0741547618616	1.95208649177696e-69	-3.50338659072983	-2.88012485552906
citations	Genome Res	log2(authors)	0.270165293090418	0.0474480368807802	5.69391930311566	1.91772941839218e-08	0.177168849666961	0.363161736513875
citations	Genome Res	log2(references + 1)	0.105670286207405	0.0963346573862104	1.09690830978686	0.273107325548909	-0.0831421727325733	0.294482745147382
citations	Genome Res	any_affil_usaTRUE	0.0667132764782886	0.0955505477987886	0.698198786037042	0.485314662365353	-0.12056235591041	0.253988908866987
citations	Genome Res	any_affil_nature_indexTRUE	0.186761531783707	0.11075388942494	1.68627515253339	0.0922459046178622	-0.0303121026369071	0.403835166204321
citations	Genome Res	last_author_pub_age	-0.000845423920255022	0.00583791589432115	-0.144816050035495	0.884903172304093	-0.0122875288178984	0.0105966809773884
citations	Genome Res	PC1	0.0260463393111104	0.0268051084689506	0.971693113694386	0.331582171201459	-0.0264907078897224	0.0785833865119431
citations	Genome Res	PC2	-0.0239542718311432	0.0299050678795784	-0.801010448382934	0.42343244661722	-0.0825671278303424	0.0346585841680561
citations	Genome Res	PC3	0.0324618420106882	0.0328308811618958	0.988759389387454	0.323166587621628	-0.0318855026473422	0.0968091866687185
citations	Genome Res	PC4	-0.0469233938523443	0.0330162445313177	-1.42122141747027	0.155755165514633	-0.111634044038495	0.0177872563338059
citations	Genome Res	PC5	0.0243364825575027	0.0357565092411652	0.680616846386251	0.496368053011601	-0.0457449877680547	0.0944179528830601
citations	Genome Res	PC6	-0.0734151544880369	0.0372379842269496	-1.97151258351158	0.0491094779644364	-0.146400262429729	-0.000430046546345139
citations	Genome Res	PC7	-0.0143480527628834	0.0392224935841421	-0.365811845493792	0.714630256963109	-0.0912227275716553	0.0625266220458884
citations	Genome Res	PC8	0.0231768614511466	0.0403843144027305	0.573907513199719	0.566238520147325	-0.0559749403185473	0.102328663220841
citations	Genome Res	PC9	0.156748362350659	0.0408960538096946	3.83284810510252	0.000139587958083573	0.0765935697738453	0.236903154927472
citations	Genome Res	PC10	-0.0767024683300618	0.0413296484343716	-1.85587033124319	0.0639463395747568	-0.157707090755132	0.00430215409500877
citations	Genome Res	PC11	0.0306062789218106	0.0429327426211891	0.712888975946883	0.476182675093896	-0.0535403503732479	0.114752908216869
citations	Genome Res	PC12	-0.0793785447094877	0.043955498911127	-1.80588428469398	0.071421277205912	-0.165529739497786	0.0067726500788107
citations	Genome Res	PC13	0.101987261822673	0.0440990726950902	2.31268495208127	0.0210664867554259	0.0155546675886825	0.188419856056664
citations	Genome Res	PC14	0.0127176644367891	0.0443813980671983	0.286553939051968	0.774549616163106	-0.0742682773584551	0.0997036062320332
citations	Genome Res	PC15	0.0867072187468533	0.0462122901967143	1.87628049546478	0.0610863057183886	-0.00386720568182004	0.177281643175527
citations	Gigascience	(Intercept)	1.91237692197865	0.462706585717918	4.13302291561612	4.53168904374428e-05	1.00548867856203	2.81926516539526
citations	Gigascience	preprintTRUE	0.353438823242694	0.164621350038193	2.14698046857648	0.0325144184685286	0.0307869060814736	0.676090740403914
citations	Gigascience	ns(pub_date, df = 3)1	-1.57859582580132	0.263081348338128	-6.00040951505393	5.12166995791855e-09	-2.09422579354828	-1.06296585805435
citations	Gigascience	ns(pub_date, df = 3)2	-4.08868176001798	0.712274687984202	-5.74031596095223	2.12293281861201e-08	-5.48471449556653	-2.69264902446944
citations	Gigascience	ns(pub_date, df = 3)3	-2.45933886719059	0.253894336411977	-9.68646603916361	1.01974459602591e-19	-2.95696262243676	-1.96171511194442
citations	Gigascience	log2(authors)	0.287066624732307	0.0631946145584468	4.54258051478117	7.77303064039759e-06	0.163207456180861	0.410925793283753
citations	Gigascience	log2(references + 1)	0.306173977625192	0.0788111313064957	3.88490778586193	0.000123436215429058	0.151706998683603	0.460640956566781
citations	Gigascience	any_affil_usaTRUE	0.072682329922142	0.138592670127361	0.524431269383512	0.60032648010347	-0.198954312048725	0.344318971893009
citations	Gigascience	any_affil_nature_indexTRUE	0.23828288821879	0.136497216528294	1.74569778255807	0.0817829923031014	-0.0292467401666303	0.505812516604211
citations	Gigascience	last_author_pub_age	-0.0019960658563434	0.0124929401063629	-0.159775508355057	0.873154496535447	-0.0264817785258306	0.0224896468131438
citations	Gigascience	PC1	-0.00761445192812305	0.0374745275228396	-0.203190071535452	0.839110202154727	-0.0810631762105437	0.0658342723542976
citations	Gigascience	PC2	-0.00706216718521009	0.047897921262753	-0.147442039216467	0.882872088454008	-0.100940367794541	0.086816033424121
citations	Gigascience	PC3	0.0806431722353042	0.0479639954115523	1.68132724439134	0.0936341424308678	-0.0133645313259828	0.174650875796591
citations	Gigascience	PC4	0.0425043035522163	0.0486042722417786	0.874497273424476	0.382475877304174	-0.0527583195364497	0.137766926640882
citations	Gigascience	PC5	-0.0751476121218572	0.0532772044565464	-1.41050216294942	0.159322097075009	-0.179569014053665	0.0292737898099505
citations	Gigascience	PC6	-0.222669374734652	0.0540985780863691	-4.11599311130058	4.86213127740194e-05	-0.328700639398763	-0.11663811007054
citations	Gigascience	PC7	-0.0147607839876339	0.0554860450110487	-0.266026961999088	0.790382584887575	-0.123511433853858	0.0939898658785898
citations	Gigascience	PC8	0.110837572579944	0.0576866040384355	1.92137454487864	0.0555352986791156	-0.00222609372581281	0.2239012388857
citations	Gigascience	PC9	0.00340585373484782	0.0580887682117097	0.0586318808213472	0.953280380028854	-0.110446039866398	0.117257747336094
citations	Gigascience	PC10	0.101727168497663	0.0628141646792379	1.6194940904991	0.106284784513488	-0.021386331992611	0.224840668987938
citations	Gigascience	PC11	0.00360023625895398	0.0626847383507419	0.05743401589729	0.954233811128676	-0.119259593288817	0.126460065806725
citations	Gigascience	PC12	-0.0201348081379629	0.0647118707542252	-0.31114551168571	0.755884106169965	-0.146967744188455	0.106698127912529
citations	Gigascience	PC13	0.0428064152256393	0.065751933399448	0.651028996601319	0.515475404939436	-0.0860650061511549	0.171677836602434
citations	Gigascience	PC14	0.0771278233779002	0.0697751032209581	1.10537741712339	0.269791682814703	-0.0596288659527423	0.213884512708543
citations	Gigascience	PC15	-0.0897336390502806	0.0718478460255219	-1.24893986409008	0.21256169927001	-0.230552829627083	0.0510855515265215
citations	ISME J	(Intercept)	3.31074354487464	0.373601322198406	8.86170189493179	4.33109633228443e-18	2.57849840878922	4.04298868096006
citations	ISME J	preprintTRUE	0.188044691791762	0.152827311807253	1.23043904631998	0.218863038847637	-0.111491335204526	0.487580718788051
citations	ISME J	ns(pub_date, df = 3)1	-1.0164638244296	0.15009803850142	-6.77199938505512	2.3267098484825e-11	-1.31065057404249	-0.722277074816706
citations	ISME J	ns(pub_date, df = 3)2	-3.11312423644754	0.30454958776343	-10.2220602539964	3.0011342496541e-23	-3.71003045997038	-2.51621801292469
citations	ISME J	ns(pub_date, df = 3)3	-3.32004573089194	0.121444440888253	-27.337980286367	1.79027950789804e-119	-3.55807246115552	-3.08201900062836
citations	ISME J	log2(authors)	0.144229785992416	0.0452589133186403	3.18677085720072	0.00148967990496773	0.0555239459084612	0.232935626076372
citations	ISME J	log2(references + 1)	0.236693573145637	0.0585508726369295	4.04252853093002	5.75307007945026e-05	0.121935971513864	0.351451174777411
citations	ISME J	any_affil_usaTRUE	0.180281875971701	0.0705423589298409	2.5556542013431	0.0107666627355127	0.0420213930847155	0.318542358858687
citations	ISME J	any_affil_nature_indexTRUE	-0.0304619566313646	0.0733033704624839	-0.415560109162441	0.677833692421987	-0.17413392268323	0.113210009420501
citations	ISME J	last_author_pub_age	-0.00482688568320116	0.00494462217152627	-0.976188981839079	0.329240315959702	-0.0145181670565509	0.00486439569014855
citations	ISME J	PC1	0.0590983967981408	0.0217419295633805	2.71817626056884	0.00669396829714908	0.0164849978995084	0.101711795696773
citations	ISME J	PC2	0.0145962006990985	0.0228363094065685	0.639166357366843	0.522881807962011	-0.0301621432775889	0.059354544675786
citations	ISME J	PC3	-0.15875433950275	0.0247007099413042	-6.42711646264396	2.13338099879164e-10	-0.207166841380276	-0.110341837625223
citations	ISME J	PC4	0.0179216712047832	0.0261724993709452	0.684751996772555	0.493681560222314	-0.0333754849476667	0.069218827357233
citations	ISME J	PC5	0.0562896756522595	0.0271291225061981	2.07488007175312	0.0382890905249231	0.00311757260793628	0.109461778696583
citations	ISME J	PC6	0.0132616125244547	0.0297668129669066	0.445516708127214	0.656056465655576	-0.0450802688252221	0.0716034938741314
citations	ISME J	PC7	0.00380260996693976	0.029690301886417	0.128075826964879	0.898118361517677	-0.0543893124205592	0.0619945323544387
citations	ISME J	PC8	0.0100724573372069	0.0318818304575267	0.315930961072815	0.752130167833822	-0.0524147821207574	0.0725596967951713
citations	ISME J	PC9	0.0157299366317835	0.0320487875767063	0.490812221652227	0.623682190273307	-0.0470845327667356	0.0785444060303026
citations	ISME J	PC10	0.0236775911025955	0.0326719834867897	0.724706264379972	0.468825769706359	-0.0403583198349997	0.0877135020401906
citations	ISME J	PC11	0.0456562195778576	0.033612679741177	1.35830347147023	0.174717107978448	-0.0202234221387283	0.111535861294444
citations	ISME J	PC12	-0.0682947653468394	0.0339758306137219	-2.01009847627557	0.0447269146774558	-0.134886169694568	-0.00170336099911109
citations	ISME J	PC13	-0.00919702429478095	0.0342039769920091	-0.268887571083608	0.78807951541922	-0.0762355873271555	0.0578415387375936
citations	ISME J	PC14	0.0182653070455803	0.0352382631677962	0.518337324362589	0.604353829333617	-0.0508004196410446	0.0873310337322052
citations	ISME J	PC15	-0.0296220227593392	0.0359488735552125	-0.824004199014579	0.410161459808722	-0.10008052021234	0.0408364746936616
citations	J Biol Chem	(Intercept)	1.99886153179926	0.137235974913588	14.5651425076978	2.03939547594822e-47	1.72988396358538	2.26783910001313
citations	J Biol Chem	preprintTRUE	0.223972300604781	0.118343160969819	1.89256648858568	0.0584536346022741	-0.00797603271269065	0.455920633922252
citations	J Biol Chem	ns(pub_date, df = 3)1	-0.749459900333751	0.0524072550949702	-14.3006898372298	8.51980044768091e-46	-0.852176232848496	-0.646743567819006
citations	J Biol Chem	ns(pub_date, df = 3)2	-2.6916939136844	0.0946695508563747	-28.4325201644616	4.73979540483995e-169	-2.87724282379548	-2.50614500357332
citations	J Biol Chem	ns(pub_date, df = 3)3	-2.67018692338905	0.0416769521380132	-64.0686707258901	0	-2.75187224856496	-2.58850159821314
citations	J Biol Chem	log2(authors)	0.154739660603489	0.0153350877611512	10.0905624417419	8.59427079518938e-24	0.124683440891871	0.184795880315106
citations	J Biol Chem	log2(references + 1)	0.259098973635452	0.0230055449607202	11.2624575543782	3.4277522893243e-29	0.214008934067723	0.30418901320318
citations	J Biol Chem	any_affil_usaTRUE	0.0845743866433147	0.0231803428205898	3.64853907890404	0.000265508530501478	0.039141749565667	0.130007023720962
citations	J Biol Chem	any_affil_nature_indexTRUE	0.0638577401706099	0.0234613039980203	2.72183251945409	0.00650694880751078	0.0178744293041445	0.109841051037075
citations	J Biol Chem	last_author_pub_age	-0.000241015728045625	0.00129955412656959	-0.185460322981567	0.852872963497559	-0.00278809501208244	0.00230606355599119
citations	J Biol Chem	PC1	-0.0383253847139414	0.0062596719938428	-6.1225867348384	9.66595874501514e-10	-0.0505941163769073	-0.0260566530509755
citations	J Biol Chem	PC2	0.0162427831096111	0.00813795581014964	1.99592913608024	0.045977377818232	0.000292682813939342	0.0321928834052829
citations	J Biol Chem	PC3	0.00109475687928162	0.00868886675738154	0.12599535818081	0.899738942709791	-0.0159351090316535	0.0181246227902168
citations	J Biol Chem	PC4	0.0114195022265434	0.00949060906068652	1.20324229493837	0.228920175460578	-0.00718174972375172	0.0300207541768385
citations	J Biol Chem	PC5	-0.00797466444588239	0.0104846518550222	-0.760603647708388	0.446917514288734	-0.0285242044721669	0.0125748755804021
citations	J Biol Chem	PC6	0.00241394328601645	0.0104187700472547	0.231691771204079	0.816783681377703	-0.0180064707698074	0.0228343573418403
citations	J Biol Chem	PC7	0.0141746270422909	0.0105472883786311	1.34391196423612	0.179017106795519	-0.00649767831438385	0.0348469323989656
citations	J Biol Chem	PC8	0.037023037625767	0.0107074667178371	3.45768411907292	0.00054783459916883	0.0160367884931451	0.0580092867583889
citations	J Biol Chem	PC9	-0.00382646452096037	0.010755975448511	-0.355752440982942	0.722035874784165	-0.0249077890186389	0.0172548599767182
citations	J Biol Chem	PC10	-0.00115579855887478	0.0110109443326585	-0.104968159310976	0.916403853460438	-0.0227368528866609	0.0204252557689113
citations	J Biol Chem	PC11	0.0378876136498982	0.0110773380640314	3.42028142780265	0.000628865687012595	0.0161764299998219	0.0595987972999745
citations	J Biol Chem	PC12	-0.0421870259529621	0.0113462703658007	-3.71814037501872	0.00020214314262868	-0.0644253072287856	-0.0199487446771385
citations	J Biol Chem	PC13	-0.0398522428685193	0.0113853709074771	-3.50030255424945	0.000467404409996944	-0.0621671597978045	-0.0175373259392342
citations	J Biol Chem	PC14	-0.0283167230565882	0.0115055287139832	-2.46114053169705	0.0138717459783674	-0.0508671449590867	-0.00576630115408973
citations	J Biol Chem	PC15	0.00272247127207063	0.0118202823140143	0.230322017676585	0.817847772326786	-0.0204448563504932	0.0258897988946345
citations	J Cell Biol	(Intercept)	3.77816881559618	0.433268494700071	8.72015588904429	1.33936231638092e-17	2.92897817034816	4.6273594608442
citations	J Cell Biol	preprintTRUE	0.565507278997425	0.134984089915482	4.18943654286596	3.07415328173625e-05	0.300943324277164	0.830071233717685
citations	J Cell Biol	ns(pub_date, df = 3)1	-1.01742112808397	0.14237448479905	-7.14609172788209	1.85444358817477e-12	-1.29646999060755	-0.738372265560383
citations	J Cell Biol	ns(pub_date, df = 3)2	-2.31559803555886	0.303388602616605	-7.63244899639524	5.90835743575202e-14	-2.91022877000734	-1.72096730111038
citations	J Cell Biol	ns(pub_date, df = 3)3	-2.5422655445315	0.127145135813319	-19.9949886267312	8.64283096403715e-74	-2.79146543153506	-2.29306565752795
citations	J Cell Biol	log2(authors)	0.0761031280302326	0.0420070691462075	1.81167431046789	0.0703723594969012	-0.00622921459241778	0.158435470652883
citations	J Cell Biol	log2(references + 1)	0.109279119386378	0.0696848776431484	1.56818987249987	0.11719108244402	-0.0273007310612731	0.245858969834029
citations	J Cell Biol	any_affil_usaTRUE	0.131127389327872	0.0688180294610016	1.90542202900739	0.0570461632814154	-0.00375346990270717	0.266008248558452
citations	J Cell Biol	any_affil_nature_indexTRUE	0.173503750103184	0.0741674581113031	2.33935144228357	0.0195368527972482	0.0281382033801463	0.318869296826221
citations	J Cell Biol	last_author_pub_age	0.00520548304245535	0.00380911733320461	1.3665851133223	0.172099356278151	-0.00226024974351294	0.0126712158284236
citations	J Cell Biol	PC1	-0.0126565816698818	0.0181064325269234	-0.699010235785655	0.484727646476455	-0.0481445373111563	0.0228313739713927
citations	J Cell Biol	PC2	0.0658191890572211	0.0190750975257203	3.45052962211451	0.000585705155127218	0.0284326849052202	0.103205693209222
citations	J Cell Biol	PC3	0.00301472714976546	0.018977827004733	0.15885523400617	0.87381884880207	-0.0341811302843428	0.0402105845838738
citations	J Cell Biol	PC4	0.136772490731057	0.0198827580497524	6.87894960994914	1.13341255352995e-11	0.0978030010402188	0.175741980421896
citations	J Cell Biol	PC5	0.0654649128889168	0.0231567088609642	2.82703873343904	0.00480304009828539	0.0200785975209474	0.110851228256886
citations	J Cell Biol	PC6	0.0294467200102757	0.0238639154060702	1.23394336215194	0.21754865778765	-0.0173256947157324	0.0762191347362839
citations	J Cell Biol	PC7	0.0249066152420236	0.0255273045099798	0.975685279747672	0.329484674291152	-0.0251259822199236	0.0749392127039709
citations	J Cell Biol	PC8	-0.0775043891459825	0.0267857094981863	-2.89349771195086	0.00390243426814603	-0.13000341506278	-0.0250053632291849
citations	J Cell Biol	PC9	-0.000709503958046644	0.027465555924917	-0.0258324994398884	0.979396711058684	-0.0545410043862547	0.0531219964701614
citations	J Cell Biol	PC10	0.0540631603108119	0.0282217768860608	1.91565401884793	0.0557282339701707	-0.00125050596559217	0.109376826587216
citations	J Cell Biol	PC11	-0.0268733482835153	0.0290542843330205	-0.924935819292354	0.355249164746981	-0.0838186991728219	0.0300720026057912
citations	J Cell Biol	PC12	0.0132548723129011	0.0292698182462536	0.452851199873701	0.650765893236644	-0.0441129172837893	0.0706226619095915
citations	J Cell Biol	PC13	-0.0967704770484224	0.0294565699344675	-3.28519163173816	0.00105881261283358	-0.154504293228064	-0.0390366608687807
citations	J Cell Biol	PC14	0.0611635062933773	0.0301554645715821	2.0282727247723	0.0428288019769627	0.00205988179600285	0.120267130790752
citations	J Cell Biol	PC15	0.00915475622034269	0.0307212926919504	0.297993847854632	0.76577717557942	-0.0510578710143937	0.0693673834550791
citations	J Neurophysiol	(Intercept)	1.02457124188504	0.25672513133341	3.99092693638327	6.85761578651115e-05	0.521399230545239	1.52774325322484
citations	J Neurophysiol	preprintTRUE	0.467586988412242	0.142939181986567	3.27123033666294	0.00109195944215801	0.187431339738954	0.747742637085529
citations	J Neurophysiol	ns(pub_date, df = 3)1	-0.887587051940012	0.109210582389102	-8.12729895329795	8.2916356233975e-16	-1.1016358601533	-0.673538243726727
citations	J Neurophysiol	ns(pub_date, df = 3)2	-2.43626211503369	0.202712923059222	-12.0182871336818	5.21781408708513e-32	-2.8335721434306	-2.03895208663677
citations	J Neurophysiol	ns(pub_date, df = 3)3	-2.3710065915366	0.104451230274286	-22.6996521277001	5.14400252038406e-100	-2.5757272410151	-2.16628594205809
citations	J Neurophysiol	log2(authors)	0.227289589672638	0.0367009478789241	6.1930168785412	7.3636488282087e-10	0.155357053631465	0.299222125713811
citations	J Neurophysiol	log2(references + 1)	0.295929556983616	0.0417936482290254	7.08073043448968	2.08019649098974e-12	0.21401551167219	0.377843602295042
citations	J Neurophysiol	any_affil_usaTRUE	0.179920717698417	0.0547936535500098	3.28360505353424	0.00104541690154856	0.0725271301590321	0.287314305237801
citations	J Neurophysiol	any_affil_nature_indexTRUE	0.149412169164555	0.0532416917169752	2.80630018217316	0.00506775900773424	0.0450603709232988	0.253763967405811
citations	J Neurophysiol	last_author_pub_age	-0.00266141672229013	0.00300422196282941	-0.885892172821871	0.375799254850699	-0.008549583571	0.00322675012641974
citations	J Neurophysiol	PC1	0.0637760407996079	0.0112972008519074	5.64529582465911	1.92471274708727e-08	0.0416339340037542	0.0859181475954615
citations	J Neurophysiol	PC2	0.00801746116452524	0.0160047664669468	0.500942090038175	0.616475865912183	-0.0233513046916649	0.0393862270207153
citations	J Neurophysiol	PC3	-0.0284933541533483	0.0178321018064754	-1.59786852175785	0.110255600163605	-0.0634436314626917	0.00645692315599509
citations	J Neurophysiol	PC4	0.00922374028401867	0.0186041943251923	0.495788214355976	0.620107071384491	-0.0272398105547426	0.04568729112278
citations	J Neurophysiol	PC5	0.0117834108574224	0.0203118245471682	0.580125671628313	0.561905726997499	-0.0280270337153239	0.0515938554301687
citations	J Neurophysiol	PC6	-0.014963602896246	0.020209530164387	-0.740423096159588	0.459144190794928	-0.0545735541629204	0.0246463483704284
citations	J Neurophysiol	PC7	-0.0446847395438919	0.0212528900503922	-2.10252532422372	0.0356520436938938	-0.0863396386100501	-0.00302984047773362
citations	J Neurophysiol	PC8	-0.0451944788228611	0.0215997309509386	-2.09236304496178	0.03655205602357	-0.0875291735624558	-0.00285978408326639
citations	J Neurophysiol	PC9	0.0331593364157946	0.0227267024493932	1.45904741304342	0.144734331412007	-0.0113841818723742	0.0777028547039634
citations	J Neurophysiol	PC10	-0.0226399057222971	0.022995750011905	-0.984525649764688	0.324995352484292	-0.0677107475431173	0.0224309360985232
citations	J Neurophysiol	PC11	-0.019175486617369	0.0233748869222776	-0.820345641933081	0.412132566915168	-0.0649894231277293	0.0266384498929914
citations	J Neurophysiol	PC12	-0.00427143955481819	0.023831419567087	-0.179235632304396	0.857773760020391	-0.0509801636067718	0.0424372844971355
citations	J Neurophysiol	PC13	-0.0276589943477645	0.0245112448644512	-1.1284206290101	0.259299414221992	-0.0757001514983312	0.0203821628028022
citations	J Neurophysiol	PC14	-0.00080070356745205	0.025145659979091	-0.0318426149131837	0.97460125007557	-0.0500852914939607	0.0484838843590566
citations	J Neurophysiol	PC15	-0.00997483110956977	0.0255423761342208	-0.390520876254963	0.696199697221448	-0.060036968412218	0.0400873061930785
citations	J Neurosci	(Intercept)	4.10311820021701	0.0822457714018337	49.8885004089769	0	3.9419194503887	4.26431695004531
citations	J Neurosci	preprintTRUE	0.439557160438982	0.114672842299431	3.83314088693486	0.000128822312777141	0.214802519527256	0.664311801350707
citations	J Neurosci	ns(pub_date, df = 3)1	-0.542713769642605	0.0756365137152546	-7.17528800554895	8.82804754108495e-13	-0.690958612440674	-0.394468926844536
citations	J Neurosci	ns(pub_date, df = 3)2	-2.01338930208292	0.13037083119977	-15.4435565344963	4.81274188611904e-52	-2.26891143586902	-1.75786716829682
citations	J Neurosci	ns(pub_date, df = 3)3	-2.04765115581469	0.0670703923132456	-30.5298818926142	5.38420267242283e-181	-2.17910670917762	-1.91619560245176
citations	J Neurosci	log2(authors)	0.145884534978652	0.0231914204869216	6.29045275863638	3.57165124327885e-10	0.100430186073962	0.191338883883343
citations	J Neurosci	log2(references + 1)	0.0442518422113526	0.00757473058358125	5.84203513551644	5.64568506659672e-09	0.0294056430749393	0.0590980413477659
citations	J Neurosci	any_affil_usaTRUE	0.0314750199340174	0.0442281404606556	0.711651441959604	0.476729784604703	-0.0552105424720462	0.118160582340081
citations	J Neurosci	any_affil_nature_indexTRUE	0.0560039405342209	0.0377318789517049	1.48426057991714	0.137833104173403	-0.0179491832801456	0.129957064348587
citations	J Neurosci	last_author_pub_age	-0.0058559514016041	0.00209515198104814	-2.79500077062407	0.00521926141829325	-0.00996237382659621	-0.00174952897661199
citations	J Neurosci	PC1	-0.048590636782377	0.00729533130372559	-6.66051132695819	3.17306351009096e-11	-0.0628892233929668	-0.0342920501717872
citations	J Neurosci	PC2	0.0589414835044166	0.0115299792845798	5.11201989610209	3.36443673771004e-07	0.0363431393641474	0.0815398276446858
citations	J Neurosci	PC3	-0.0804284484755273	0.0131574618182709	-6.11276320512224	1.09089856255673e-09	-0.106216599767299	-0.0546402971837554
citations	J Neurosci	PC4	0.0179074184843808	0.0135336129067199	1.32318092794638	0.185864770582626	-0.00861797539349668	0.0444328123622582
citations	J Neurosci	PC5	-0.0165658481585009	0.0145176451134824	-1.14108369704645	0.253915982361596	-0.0450199097212602	0.0118882134042585
citations	J Neurosci	PC6	-0.0205144479952812	0.0145302222038333	-1.41184681882353	0.15808717536049	-0.0489931602021587	0.00796426421159636
citations	J Neurosci	PC7	0.0136987419467456	0.0149428889486252	0.916739861605273	0.359344414939253	-0.0155887822175414	0.0429862661110326
citations	J Neurosci	PC8	0.0139779574634442	0.0151413832378668	0.923162517179207	0.355988452152295	-0.0156986083588932	0.0436545232857816
citations	J Neurosci	PC9	0.0114523643136472	0.0155714944397514	0.735469826480575	0.462104469681736	-0.0190672039737312	0.0419719326010257
citations	J Neurosci	PC10	-0.02986326959793	0.0159748701463831	-1.86939044413399	0.0616549685589013	-0.0611734397425451	0.00144690054668502
citations	J Neurosci	PC11	-0.035478806998668	0.0165452712637092	-2.14434725385785	0.0320762250993851	-0.0679069427899835	-0.00305067120735252
citations	J Neurosci	PC12	-0.032314863845806	0.0168099255645699	-1.92236805104692	0.0546434687467507	-0.0652617125351623	0.000631984843550169
citations	J Neurosci	PC13	-0.0773208502000228	0.0170572645511984	-4.53301582841372	6.01645814398376e-06	-0.110752474395144	-0.0438892260049021
citations	J Neurosci	PC14	0.0729523389921582	0.0172091830222834	4.23915178876856	2.30372114019807e-05	0.0392229600651246	0.106681717919192
citations	J Neurosci	PC15	0.0949790645777766	0.0175283272397232	5.41860402757273	6.42736839304972e-08	0.0606241744786869	0.129333954676866
citations	J Virol	(Intercept)	2.75941966825995	0.216600838287158	12.7396536877741	2.71777383393898e-36	2.33488982619593	3.18394951032396
citations	J Virol	preprintTRUE	0.11596670793554	0.151462436803099	0.765646653937679	0.443943542542813	-0.180894213209208	0.412827629080287
citations	J Virol	ns(pub_date, df = 3)1	-0.883106328276366	0.0816895362239302	-10.8105195487408	8.93676391206163e-27	-1.04321487718905	-0.722997779363683
citations	J Virol	ns(pub_date, df = 3)2	-2.65830844336569	0.155917074726648	-17.0495017818042	1.96371320230681e-62	-2.96390029440476	-2.35271659232662
citations	J Virol	ns(pub_date, df = 3)3	-2.42392992117483	0.0694290954723418	-34.9123073645752	2.87414023748414e-226	-2.56000844777981	-2.28785139456985
citations	J Virol	log2(authors)	0.247080322281353	0.0247726052733774	9.97393368822959	4.32147767013763e-23	0.198526908142306	0.295633736420399
citations	J Virol	log2(references + 1)	0.103938470164232	0.0355236043895248	2.92589876366491	0.00345901173913699	0.0343134849597144	0.173563455368749
citations	J Virol	any_affil_usaTRUE	0.0738144475990575	0.038789750530872	1.90293689927988	0.0571392344646046	-0.0022120664107451	0.14984096160886
citations	J Virol	any_affil_nature_indexTRUE	0.0453050295879679	0.038971106131261	1.16252870614894	0.245108226375179	-0.0310769348669917	0.121686994042928
citations	J Virol	last_author_pub_age	-0.00399250340631141	0.00212794704882042	-1.87622309893687	0.060716403485406	-0.00816320298300773	0.000178196170384904
citations	J Virol	PC1	0.0168909820251056	0.0115367888000733	1.46409736000352	0.14326644064257	-0.00572070852028323	0.0395026725704944
citations	J Virol	PC2	0.0134166305052118	0.0124391908127828	1.07857743378489	0.28085815638483	-0.0109637354846639	0.0377969964950876
citations	J Virol	PC3	0.0153352675657179	0.0128886526123442	1.1898270538404	0.234203421523526	-0.00992602736372493	0.0405965624951607
citations	J Virol	PC4	-0.00316948068734179	0.0132635768226725	-0.238961234191666	0.811151080013308	-0.0291656135659601	0.0228266521912765
citations	J Virol	PC5	0.0114929759502851	0.014592666758617	0.787585719621711	0.430997916107918	-0.0171081253349989	0.0400940772355692
citations	J Virol	PC6	0.0338185883252617	0.0154851689896796	2.18393408220477	0.0290400998936171	0.00346821481097322	0.0641689618395502
citations	J Virol	PC7	0.0323640532068741	0.0155706823396571	2.07852504475323	0.0377412303292972	0.00184607660643231	0.0628820298073158
citations	J Virol	PC8	-0.00976323878706037	0.0158342597520828	-0.616589530544749	0.537549750489052	-0.0407978176229948	0.0212713400488741
citations	J Virol	PC9	-0.00753986658236065	0.0162622542811514	-0.463642152681112	0.64293596074927	-0.0394132992808496	0.0243335661161283
citations	J Virol	PC10	0.00376683814513267	0.0166175413992919	0.226678427008051	0.820688409622266	-0.0288029445090828	0.0363366207993482
citations	J Virol	PC11	-0.0809140437963903	0.0169310792939927	-4.77902456136385	1.84153034156523e-06	-0.114098349432008	-0.0477297381607727
citations	J Virol	PC12	-0.0712496178611252	0.0172664902617973	-4.12646790290482	3.77851819191216e-05	-0.105091316913659	-0.0374079188085909
citations	J Virol	PC13	0.0371650462444656	0.0176311479893109	2.10791981707586	0.0351161810588519	0.00260863117932048	0.0717214613096108
citations	J Virol	PC14	-0.00633593567593289	0.0181067483629544	-0.349921230964691	0.726421044470941	-0.041824510344453	0.0291526389925872
citations	J Virol	PC15	-0.0236597495349169	0.0186520795951744	-1.26847783455943	0.204720445512887	-0.0602171537782332	0.0128976547083994
citations	MBio	(Intercept)	2.96032076506528	0.295951673292297	10.0027167683607	6.38050994692272e-23	2.38026614424801	3.54037538588254
citations	MBio	preprintTRUE	0.208255136814915	0.10321271235362	2.01772758477083	0.0437780747343428	0.00596193785512811	0.410548335774701
citations	MBio	ns(pub_date, df = 3)1	-0.918900893571465	0.106406536586066	-8.63575606399165	1.33000905448406e-17	-1.1274538729998	-0.710347914143133
citations	MBio	ns(pub_date, df = 3)2	-2.81845764788424	0.22431606004146	-12.5646716840663	1.12751645892876e-34	-3.25810904671943	-2.37880624904906
citations	MBio	ns(pub_date, df = 3)3	-2.61582309532474	0.0890692933415347	-29.3684051729748	2.06345316228862e-153	-2.79039570240258	-2.4412504882469
citations	MBio	log2(authors)	0.191975728809567	0.0319426506682367	6.01001246901733	2.26936956975473e-09	0.129369283929079	0.254582173690056
citations	MBio	log2(references + 1)	0.182340329629812	0.049336378453229	3.69585963434002	0.000226160486478306	0.0856428047338449	0.279037854525778
citations	MBio	any_affil_usaTRUE	0.0802436458585198	0.0579417040320253	1.38490310561401	0.166265646233039	-0.033320007247129	0.193807298964168
citations	MBio	any_affil_nature_indexTRUE	0.0962238680903356	0.0570200084739548	1.68754566450631	0.0916837695043296	-0.0155332949167844	0.207981031097456
citations	MBio	last_author_pub_age	-0.00719182742266542	0.00280661493665144	-2.56245604936669	0.010479817054059	-0.0126926916169744	-0.00169096322835642
citations	MBio	PC1	-0.0570854127142812	0.0160501854295163	-3.55668244239104	0.000385964572805671	-0.0885431981013226	-0.0256276273272397
citations	MBio	PC2	-0.057501661952502	0.0190799544695872	-3.01372113042291	0.00261919242204556	-0.094897685539557	-0.020105638365447
citations	MBio	PC3	0.0774897835106048	0.0195116079947477	3.97147090754715	7.44414179228894e-05	0.0392477345604356	0.115731832460774
citations	MBio	PC4	0.00204848746148968	0.0214772402085803	0.0953794547900663	0.924024789080227	-0.0400461298346433	0.0441431047576226
citations	MBio	PC5	-0.0905978093610546	0.0228255173504605	-3.9691459330374	7.51645769095196e-05	-0.135335001296451	-0.045860617425658
citations	MBio	PC6	-0.0214476653054829	0.0239849220282615	-0.894214510274875	0.371334986866699	-0.0684572486528769	0.025561918041911
citations	MBio	PC7	-0.00181956633377046	0.0244157010181288	-0.074524435420446	0.940601955061062	-0.0496734609866008	0.0460343283190599
citations	MBio	PC8	0.0597992902289878	0.0248087915109935	2.41040722207243	0.0160413592868708	0.0111749523674775	0.108423628090498
citations	MBio	PC9	0.0537571170630654	0.0255459862591503	2.10432733024	0.0354978786454196	0.00368790404557581	0.103826330080555
citations	MBio	PC10	0.0496505357465474	0.0267325226285255	1.85730828461235	0.0634418796794244	-0.00274424582126445	0.102045317314359
citations	MBio	PC11	0.0980871544039302	0.0274863197221595	3.56858085751118	0.000368982298472898	0.0442149576809446	0.151959351126916
citations	MBio	PC12	-0.0297033270511611	0.0273951280180101	-1.08425582211675	0.278406683311296	-0.0833967913183251	0.0239901372160028
citations	MBio	PC13	-0.0276002488124897	0.0278959825085806	-0.989398699400537	0.322610330953806	-0.0822753698426669	0.0270748722176875
citations	MBio	PC14	-0.0690646596836406	0.0292384375874489	-2.36211868288365	0.0182841019995174	-0.126370944319263	-0.0117583750480185
citations	MBio	PC15	-0.0269124765117174	0.0297616418968266	-0.904267197522694	0.365983153681008	-0.0852442227502759	0.0314192697268411
citations	Mol Biol Cell	(Intercept)	1.07041107871532	0.244192235800694	4.38347712082447	1.27368119081209e-05	0.591803091241643	1.54901906618899
citations	Mol Biol Cell	preprintTRUE	0.324165433250872	0.118871917918342	2.72701441120479	0.00648722467633564	0.09118075535772	0.557150111144024
citations	Mol Biol Cell	ns(pub_date, df = 3)1	-0.712627679242083	0.125217540124605	-5.69111706341571	1.59671128280159e-08	-0.958049548119009	-0.467205810365158
citations	Mol Biol Cell	ns(pub_date, df = 3)2	-2.09665982396839	0.24241689947509	-8.64898374869213	1.70049566126324e-17	-2.57178821618343	-1.62153143175334
citations	Mol Biol Cell	ns(pub_date, df = 3)3	-2.64439141952706	0.114029909359614	-23.1903316803269	4.3976465949756e-98	-2.86788593503227	-2.42089690402185
citations	Mol Biol Cell	log2(authors)	0.204040276208413	0.0364790164744762	5.59336012666834	2.77519736041065e-08	0.132542717726996	0.27553783468983
citations	Mol Biol Cell	log2(references + 1)	0.369790030152438	0.0393639530720495	9.39412841681821	2.94956491306673e-20	0.292638099842097	0.44694196046278
citations	Mol Biol Cell	any_affil_usaTRUE	0.0231177449275697	0.0614753011413063	0.376049315715129	0.706948877390961	-0.0973716312481447	0.143607121103284
citations	Mol Biol Cell	any_affil_nature_indexTRUE	0.147495171657563	0.0635502761591357	2.32092101831661	0.0204634846388107	0.0229389191780827	0.272051424137043
citations	Mol Biol Cell	last_author_pub_age	-0.00695417439021577	0.00333801270633239	-2.08332771682484	0.0374395229896878	-0.0134965590745643	-0.000411789705867204
citations	Mol Biol Cell	PC1	-0.0252774855930198	0.0165486395447427	-1.52746608110454	0.126917296682403	-0.0577122230938509	0.00715725190781129
citations	Mol Biol Cell	PC2	-0.0247528487291098	0.0180692705740767	-1.36988643939074	0.170986988250262	-0.0601679682812094	0.0106622708229898
citations	Mol Biol Cell	PC3	0.0127685769056357	0.0197632771841068	0.646075890485606	0.518357777863938	-0.0259667345916959	0.0515038884029672
citations	Mol Biol Cell	PC4	0.0472516419010781	0.0211830997344263	2.23062925131234	0.0258960099658504	0.0057335293406825	0.0887697544614736
citations	Mol Biol Cell	PC5	-0.0206944421553782	0.0222236107398168	-0.931191713068532	0.351947824818962	-0.0642519188118566	0.0228630345011002
citations	Mol Biol Cell	PC6	0.073782342633287	0.0235078181892385	3.13862996724482	0.00174013528459748	0.0277078656272639	0.11985681963931
citations	Mol Biol Cell	PC7	-0.0815891826004127	0.0241995725818233	-3.37151337382279	0.000772153710438172	-0.129019473302049	-0.034158891898776
citations	Mol Biol Cell	PC8	-0.0653779682553338	0.0245257524104753	-2.66568654698683	0.00778968355653553	-0.113447559673612	-0.0173083768370558
citations	Mol Biol Cell	PC9	0.0124800893659256	0.0264068807669075	0.472607479697693	0.636581995499163	-0.0392764458812565	0.0642366246131078
citations	Mol Biol Cell	PC10	-0.0649907392659161	0.0265066895293871	-2.45186179110987	0.0143582729902835	-0.1169428960929	-0.0130385824389325
citations	Mol Biol Cell	PC11	-0.0146181612081313	0.0272332697677918	-0.536775838258681	0.591525217589728	-0.0679943891342667	0.0387580667180042
citations	Mol Biol Cell	PC12	0.0386328813939329	0.027181301218331	1.42130360440136	0.155496825179566	-0.0146414900469306	0.0919072528347965
citations	Mol Biol Cell	PC13	-0.00714732707397298	0.0278182970728235	-0.25692899372174	0.797279072693777	-0.061670187447943	0.0473755332999971
citations	Mol Biol Cell	PC14	-0.0146038412147943	0.0281886223469111	-0.518075734069869	0.604504054028209	-0.069852525788541	0.0406448433589524
citations	Mol Biol Cell	PC15	-0.000673997392268319	0.0283990330867066	-0.0237331105679022	0.981069569803618	-0.0563350794379745	0.0549870846534379
citations	Mol Biol Evol	(Intercept)	3.55312049899206	0.34383323379808	10.3338483594017	1.16695840122823e-23	2.87921974405988	4.22702125392423
citations	Mol Biol Evol	preprintTRUE	0.28614439546871	0.131969334558801	2.16826428977114	0.0304156989454161	0.027489252669742	0.544799538267677
citations	Mol Biol Evol	ns(pub_date, df = 3)1	-1.01464329921705	0.210911928371773	-4.81074402500622	1.77902225526533e-06	-1.42802308273561	-0.60126351569848
citations	Mol Biol Evol	ns(pub_date, df = 3)2	-3.39354305000787	0.39753986101626	-8.53635920013834	6.33597847847274e-17	-4.17270686001879	-2.61437923999694
citations	Mol Biol Evol	ns(pub_date, df = 3)3	-2.52561169308452	0.211623992699111	-11.9344298388485	1.83507733889297e-30	-2.94038709703935	-2.1108362891297
citations	Mol Biol Evol	log2(authors)	0.111023859878331	0.0503684674725974	2.20423343113889	0.0277755618953649	0.0123034776755627	0.209744242081099
citations	Mol Biol Evol	log2(references + 1)	0.149475449697205	0.0466186448080202	3.20634480716371	0.00139462475600162	0.0581045848654201	0.24084631452899
citations	Mol Biol Evol	any_affil_usaTRUE	0.0461303434822378	0.104381167140475	0.441941249997292	0.658644266159967	-0.158452984777349	0.250713671741825
citations	Mol Biol Evol	any_affil_nature_indexTRUE	0.109443537359156	0.0991552943801098	1.10375888693957	0.27001048227261	-0.0848972685023262	0.303784343220638
citations	Mol Biol Evol	last_author_pub_age	-0.00135644119496984	0.0062815131608186	-0.215941789858969	0.829084991220919	-0.0136679807585886	0.010955098368649
citations	Mol Biol Evol	PC1	0.0779587596756135	0.028398188267335	2.74520187491276	0.00617514776868826	0.0222993334454491	0.133618185905778
citations	Mol Biol Evol	PC2	-0.162233529295687	0.0316694078720679	-5.12272063788017	3.7290831413627e-07	-0.224304428136649	-0.100162630454724
citations	Mol Biol Evol	PC3	0.0458339009724426	0.0372819340700744	1.22938635335533	0.219267583287286	-0.0272373470789	0.118905149023785
citations	Mol Biol Evol	PC4	-0.00830340317659237	0.0370680699446123	-0.224004195227845	0.822807931441853	-0.0809554852444442	0.0643486788912595
citations	Mol Biol Evol	PC5	-0.0643913747157686	0.0378312394512981	-1.70206886292115	0.0891085450503817	-0.138539241530824	0.00975649209928638
citations	Mol Biol Evol	PC6	0.0763473061214431	0.0402516496655782	1.89674974207908	0.0582001526776603	-0.00254447754141392	0.1552390897843
citations	Mol Biol Evol	PC7	0.137337619936373	0.0408874315835442	3.35892020157234	0.000817336353817961	0.0571997266122814	0.217475513260466
citations	Mol Biol Evol	PC8	-0.00720975525769912	0.0419794343752544	-0.171744935704733	0.863678984139033	-0.0894879347245605	0.0750684242091623
citations	Mol Biol Evol	PC9	-0.0245522835450424	0.0423765326451162	-0.57938396590057	0.562483817332661	-0.107608761319156	0.0585041942290712
citations	Mol Biol Evol	PC10	-0.0174905290195141	0.0441976881304124	-0.395734024999351	0.692400673820682	-0.104116405955056	0.0691353479160275
citations	Mol Biol Evol	PC11	-0.0039285733622248	0.0442469242103677	-0.0887874904828817	0.929271738680868	-0.0906509512412187	0.0827938045167691
citations	Mol Biol Evol	PC12	0.00322492435033548	0.0456814626725276	0.0705959083108546	0.943735992093109	-0.0863090972489293	0.0927589459496003
citations	Mol Biol Evol	PC13	-0.044582973996326	0.0457643238707421	-0.974186226857569	0.330241559724228	-0.134279400559807	0.0451134525671551
citations	Mol Biol Evol	PC14	0.0388283184562527	0.0483769330559447	0.802620505341882	0.422418729944481	-0.0559887280159041	0.13364536492841
citations	Mol Biol Evol	PC15	0.0521172606221741	0.0476982366294663	1.09264543733631	0.27485944809302	-0.041369565297649	0.145604086541997
citations	Mol Cell	(Intercept)	5.02371674044038	0.450692100725738	11.1466713801968	1.7752290372584e-27	4.14037645490123	5.90705702597952
citations	Mol Cell	preprintTRUE	0.336306084998307	0.135408713184989	2.48363696166923	0.013145957149612	0.0709098839628135	0.6017022860338
citations	Mol Cell	ns(pub_date, df = 3)1	-0.898756530110569	0.129409429074273	-6.94506216849733	6.30397276345305e-12	-1.15239435035603	-0.645118709865104
citations	Mol Cell	ns(pub_date, df = 3)2	-2.86696497270277	0.259084131078998	-11.0657683307844	4.02351661053906e-27	-3.37476053858346	-2.35916940682208
citations	Mol Cell	ns(pub_date, df = 3)3	-2.91765373942466	0.10416728110026	-28.0093106838071	3.87998246620098e-132	-3.12181785874863	-2.71348962010069
citations	Mol Cell	log2(authors)	0.171430763638748	0.0371787338144357	4.61098983344571	4.45442057661552e-06	0.098561784371652	0.244299742905843
citations	Mol Cell	log2(references + 1)	0.0609543558237705	0.0761318063974047	0.800642447725349	0.423503467555129	-0.0882612427931188	0.21016995444066
citations	Mol Cell	any_affil_usaTRUE	-0.0888076097928348	0.0608084809059521	-1.46044776106456	0.144439243700617	-0.207990042323092	0.0303748227374228
citations	Mol Cell	any_affil_nature_indexTRUE	-0.0671349464135891	0.0768659117582475	-0.873403370596013	0.382624960028522	-0.217789365098588	0.0835194722714099
citations	Mol Cell	last_author_pub_age	0.00119239027623599	0.00335011614199459	0.355925056235832	0.721961744710365	-0.00537371670609968	0.00775849725857167
citations	Mol Cell	PC1	-0.013851022820591	0.014480605979804	-0.956522319570664	0.339008748447674	-0.0422324890153222	0.0145304433741402
citations	Mol Cell	PC2	-0.00449364057544716	0.0157984321771951	-0.284435855725841	0.776127414540519	-0.0354579986549484	0.0264707175040541
citations	Mol Cell	PC3	0.0891784739973089	0.0173863554747094	5.12922182725585	3.41018801478322e-07	0.0551018434444676	0.12325510455015
citations	Mol Cell	PC4	-0.011699815983878	0.0180407136694052	-0.648522902046796	0.516775826945177	-0.0470589650313117	0.0236593330635557
citations	Mol Cell	PC5	-0.0510809323708811	0.0185690299119234	-2.75086704115229	0.00603674583595957	-0.087475562226098	-0.0146863025156642
citations	Mol Cell	PC6	-0.0880832128116104	0.0205963774218209	-4.27663617769454	2.05422845391247e-05	-0.128451370770373	-0.0477150548528474
citations	Mol Cell	PC7	0.0473723170360709	0.0205599311647081	2.30410873735741	0.0213934965624206	0.00707559242862032	0.0876690416435214
citations	Mol Cell	PC8	-0.0228608164083234	0.0218431226571689	-1.04659103769764	0.295507395935457	-0.0656725501262653	0.0199509173096186
citations	Mol Cell	PC9	-0.00442865191050129	0.0226923360818688	-0.195160687490425	0.845301508432665	-0.0489048133560429	0.0400475095350403
citations	Mol Cell	PC10	0.0168283991290703	0.0227213938143412	0.740641144930491	0.459061720114362	-0.0277047144255897	0.0613615126837302
citations	Mol Cell	PC11	-0.0577425361765688	0.0236658769391752	-2.43990688893446	0.0148407788340647	-0.104126802639909	-0.0113582697132284
citations	Mol Cell	PC12	-0.0181103925151049	0.02402733492665	-0.753741210600003	0.45115838814167	-0.0652031036158202	0.0289823185856104
citations	Mol Cell	PC13	-0.0148971817186913	0.024825215207782	-0.600082681821887	0.548568947701931	-0.0635537094343999	0.0337593459970174
citations	Mol Cell	PC14	-0.0290275301084284	0.02522089447238	-1.15093182520616	0.24999870043541	-0.0784595749321785	0.0204045147153217
citations	Mol Cell	PC15	-0.00105582796870145	0.0258485479937578	-0.0408467032251261	0.967425172163475	-0.0517180510891217	0.0496063951517188
citations	Mol Ecol	(Intercept)	2.82878718923341	0.37319729145816	7.5798706313777	6.26875921775848e-14	2.09733393884752	3.5602404396193
citations	Mol Ecol	preprintTRUE	0.262827669921081	0.11110772571149	2.36552110339795	0.0181405518058277	0.045060529122405	0.480594810719756
citations	Mol Ecol	ns(pub_date, df = 3)1	-1.36189194614995	0.118183544152522	-11.5235327888996	2.0413285153679e-29	-1.59352743625419	-1.13025645604571
citations	Mol Ecol	ns(pub_date, df = 3)2	-3.22295550699675	0.231346065622965	-13.9313175623628	2.08757935716366e-41	-3.6763854635828	-2.7695255504107
citations	Mol Ecol	ns(pub_date, df = 3)3	-3.12552613202305	0.108526463918231	-28.7996680180971	1.37662621980626e-143	-3.33823409267227	-2.91281817137383
citations	Mol Ecol	log2(authors)	0.112610667876767	0.0321143909168888	3.50654845574373	0.000468322844422934	0.0496676182942248	0.175553717459309
citations	Mol Ecol	log2(references + 1)	0.231842589048854	0.0586773503989607	3.95114277438405	8.16602952678637e-05	0.116837095558654	0.346848082539054
citations	Mol Ecol	any_affil_usaTRUE	0.126400212021776	0.0518032298679605	2.44000639234182	0.0148105441224308	0.0248677471977239	0.227932676845828
citations	Mol Ecol	any_affil_nature_indexTRUE	0.132837538933956	0.0521774483592765	2.54588032015826	0.0110068166262166	0.0305716193445757	0.235103458523336
citations	Mol Ecol	last_author_pub_age	-0.00296235782037511	0.00364762204526744	-0.812133983074969	0.41685301828303	-0.0101115656583136	0.0041868500175634
citations	Mol Ecol	PC1	0.0996753389579364	0.0158871159057095	6.27397317105964	4.68345974010236e-10	0.0685371639645323	0.130813513951341
citations	Mol Ecol	PC2	-0.0473276412748555	0.0171169425140459	-2.76495882579609	0.00576782639725647	-0.0808762321278279	-0.013779050421883
citations	Mol Ecol	PC3	0.117702572249166	0.0201946563652475	5.82840183662238	6.93793143250226e-09	0.0781217730931186	0.157283371405214
citations	Mol Ecol	PC4	0.0520623687630389	0.0218219762887407	2.38577698344861	0.0171755585063978	0.00929208116562005	0.0948326563604577
citations	Mol Ecol	PC5	0.0450151624091094	0.0215919820470948	2.08480918106201	0.0372677188546194	0.00269565524196813	0.0873346695762507
citations	Mol Ecol	PC6	0.0269999275291785	0.0221134100238235	1.22097530412951	0.222301249745357	-0.0163415596928826	0.0703414147512395
citations	Mol Ecol	PC7	-0.0334347802350587	0.0231658574846138	-1.44327833568282	0.149166109348896	-0.0788390265758893	0.0119694661057719
citations	Mol Ecol	PC8	0.0239933245643273	0.0237990285507911	1.00816403128059	0.313550181592502	-0.0226519142622636	0.0706385633909183
citations	Mol Ecol	PC9	-0.000619388173638082	0.0240222138461171	-0.0257839755155705	0.979433323120124	-0.047702062140947	0.0464632857936709
citations	Mol Ecol	PC10	0.0381489025533841	0.0244166771278225	1.56241172186013	0.118417353617311	-0.00970690523929086	0.0860047103460591
citations	Mol Ecol	PC11	-0.0292411968314287	0.0253322968355399	-1.15430499734255	0.24857242962039	-0.0788915862747649	0.0204091926119076
citations	Mol Ecol	PC12	0.0234605520525792	0.0253144633709412	0.926764739540553	0.354208658154889	-0.026154884442424	0.0730759885475824
citations	Mol Ecol	PC13	0.0661792882901596	0.0265035458144207	2.4969975245407	0.0126392888790208	0.0142332930312877	0.118125283549032
citations	Mol Ecol	PC14	-0.047853377494846	0.0264605455855752	-1.8084803784595	0.0707465539760093	-0.0997150938538536	0.0040083388641617
citations	Mol Ecol	PC15	-0.0454160819665613	0.0268909107468428	-1.68890084810138	0.0914614320503977	-0.0981212985418543	0.00728913460873169
citations	Nat Genet	(Intercept)	4.63909208006401	0.472306048161055	9.82221612051449	1.8732082967535e-21	3.7133892359879	5.56479492414011
citations	Nat Genet	preprintTRUE	0.592632776616048	0.115308061511904	5.13956065903396	3.55106106121017e-07	0.366633128925587	0.818632424306508
citations	Nat Genet	ns(pub_date, df = 3)1	-1.11198891398496	0.165958067239586	-6.70042097067592	4.19344103309469e-11	-1.43726074871843	-0.786717079251499
citations	Nat Genet	ns(pub_date, df = 3)2	-3.83958722239842	0.340793350296965	-11.266614266542	3.12811259955613e-27	-4.50752991515122	-3.17164452964563
citations	Nat Genet	ns(pub_date, df = 3)3	-2.87060889119895	0.139433290047562	-20.5876867010723	2.06123330321372e-74	-3.1438931179381	-2.5973246644598
citations	Nat Genet	log2(authors)	0.173641538776568	0.0303299418879426	5.72508643168875	1.5178686816446e-08	0.114195945023008	0.233087132530129
citations	Nat Genet	log2(references + 1)	0.237117790240568	0.080927858176774	2.92998969183914	0.00349696107441893	0.0785021028681255	0.39573347761301
citations	Nat Genet	any_affil_usaTRUE	0.0840148106496183	0.0940230533073479	0.893555438738901	0.371858368245319	-0.100266987549273	0.26829660884851
citations	Nat Genet	any_affil_nature_indexTRUE	0.345532731458364	0.137687905004343	2.50953583357568	0.0123074119835395	0.0756693965430791	0.615396066373649
citations	Nat Genet	last_author_pub_age	-0.00181821472977578	0.00509236084968363	-0.357047503789669	0.721160864109084	-0.0117990585914375	0.00816262913188592
citations	Nat Genet	PC1	0.0580665526504051	0.019681166544245	2.95036132740742	0.0032770224878014	0.0194921750499503	0.0966409302508598
citations	Nat Genet	PC2	-0.0369870075120481	0.0248350222138513	-1.48930841267455	0.136844057298331	-0.0856627566064489	0.0116887415823527
citations	Nat Genet	PC3	-0.0269629818321609	0.0248311223706587	-1.08585433351258	0.277906856282087	-0.0756310873743587	0.021705123710037
citations	Nat Genet	PC4	-0.0637680807530679	0.0274103460302112	-2.32642377745921	0.0202726042036824	-0.117491371776062	-0.0100447897300736
citations	Nat Genet	PC5	-0.0923370465031016	0.029031770188902	-3.18055171635381	0.00153298759709638	-0.149238270480793	-0.0354358225254101
citations	Nat Genet	PC6	-0.025708845466089	0.0298963646066062	-0.859932162467947	0.390112671741485	-0.0843046433637151	0.032886952431537
citations	Nat Genet	PC7	0.0778773252003999	0.0302710150707226	2.57266976407807	0.0102909598574257	0.0185472258863143	0.137207424514485
citations	Nat Genet	PC8	0.0514019605290728	0.0320913477109393	1.6017389170462	0.109651969526351	-0.0114959251997201	0.114299846257866
citations	Nat Genet	PC9	0.0425221771395898	0.0321754000517811	1.32157415513583	0.186729763922309	-0.0205404481500693	0.105584802429249
citations	Nat Genet	PC10	-0.0678391319184727	0.0329738820362784	-2.05735957458194	0.0400112617800995	-0.132466753140051	-0.00321151069689481
citations	Nat Genet	PC11	-0.0110187235827171	0.0342846786607554	-0.321389145622354	0.74800878108428	-0.0782154589793266	0.0561780118138924
citations	Nat Genet	PC12	-0.0606852720867526	0.0347481677598294	-1.74643084798583	0.0811625584503377	-0.128790429424774	0.00741988525126881
citations	Nat Genet	PC13	-0.00223846638727824	0.034825837333826	-0.064276024889832	0.948768284134868	-0.0704958532930276	0.0660189205184711
citations	Nat Genet	PC14	-0.0628858620480726	0.0362375356016239	-1.73537910357388	0.0831015444243806	-0.133910126715743	0.00813840261959817
citations	Nat Genet	PC15	0.0797669886613163	0.0365031395681338	2.18520898763871	0.0291951163986609	0.00822214978513516	0.151311827537498
citations	Nat Methods	(Intercept)	3.64900942423715	0.515756182322701	7.07506676469468	4.84153704161973e-12	2.63814588208078	4.65987296639352
citations	Nat Methods	preprintTRUE	1.12312645182218	0.139804265881549	8.03356353069911	6.36529014664875e-15	0.849115125809277	1.39713777783507
citations	Nat Methods	ns(pub_date, df = 3)1	-1.05370495814181	0.213674688801767	-4.93135131751316	1.0997851190851e-06	-1.47249965260107	-0.63491026368254
citations	Nat Methods	ns(pub_date, df = 3)2	-3.65628548847376	0.4253254032664	-8.59644277156817	9.64587349257515e-17	-4.48990796058588	-2.82266301636164
citations	Nat Methods	ns(pub_date, df = 3)3	-3.26857692384498	0.160116525270398	-20.4137387963244	1.69617430237525e-68	-3.58239954670466	-2.95475430098531
citations	Nat Methods	log2(authors)	0.228753411000317	0.0561799386879848	4.07179887238362	5.39045364259009e-05	0.118642754518199	0.338864067482436
citations	Nat Methods	log2(references + 1)	0.406311560910335	0.0932906739228682	4.35532882146686	1.6004814853142e-05	0.223465199928044	0.589157921892627
citations	Nat Methods	any_affil_usaTRUE	0.160217818025664	0.108540843717089	1.47610625216135	0.140519485471623	-0.0525183265114217	0.372953962562749
citations	Nat Methods	any_affil_nature_indexTRUE	0.0280082447037579	0.134595006812384	0.20809274702738	0.835237870502483	-0.235793121147438	0.291809610554954
citations	Nat Methods	last_author_pub_age	0.00385007448684422	0.00737691670129516	0.521908358565072	0.601955945730071	-0.0106084165646463	0.0183085655383348
citations	Nat Methods	PC1	-0.0491824321796312	0.0287371105036191	-1.71146059286083	0.0875912819877819	-0.105506133786472	0.00714126942720998
citations	Nat Methods	PC2	-0.136707916745661	0.0328167978675735	-4.16579086409716	3.63178266581262e-05	-0.201027658654036	-0.072388174837286
citations	Nat Methods	PC3	-0.091675125294221	0.0346344607355589	-2.64693381525929	0.00836835043390254	-0.159557420959883	-0.023792829628559
citations	Nat Methods	PC4	-0.0335809394551496	0.0367276685484631	-0.914322655979067	0.360970274164604	-0.105565847046262	0.0384039681359626
citations	Nat Methods	PC5	0.0105014832836195	0.0387512189088297	0.270997495803329	0.786500289893638	-0.0654495101347142	0.0864524767019532
citations	Nat Methods	PC6	-0.0446198961838743	0.0404725561935971	-1.10247289472992	0.27076513939537	-0.123944648685598	0.0347048563178495
citations	Nat Methods	PC7	-0.130328950356689	0.0415443373139197	-3.13710504928481	0.00180271974874771	-0.211754355253555	-0.0489035454598229
citations	Nat Methods	PC8	0.00414468625640313	0.04455041530806	0.0930336165834413	0.925912618391856	-0.0831725232436963	0.0914618957565025
citations	Nat Methods	PC9	-0.0806177919310835	0.0455955136174165	-1.76810798991173	0.0776280363617621	-0.169983356477825	0.00874777261565852
citations	Nat Methods	PC10	-0.0764923347009349	0.0464423949474603	-1.64703682459679	0.100153452806002	-0.167517756153742	0.0145330867518723
citations	Nat Methods	PC11	-0.0342423442455149	0.0471217982819115	-0.726677365763001	0.467749980616729	-0.126599371764823	0.0581146832737929
citations	Nat Methods	PC12	0.0172368516820922	0.047687514487928	0.361454184961886	0.717906481858407	-0.0762289592264788	0.110702662590663
citations	Nat Methods	PC13	-0.0267049770020602	0.0484730258073118	-0.55092448959586	0.581921599593218	-0.121710361806072	0.0683004078019515
citations	Nat Methods	PC14	0.054204272151411	0.0494937100345027	1.0951749649324	0.273946007133487	-0.0428016169774829	0.151210161280305
citations	Nat Methods	PC15	0.0300390688013185	0.0508362548440839	0.590898540686152	0.554844650754625	-0.0695981598019858	0.129676297404623
citations	Neuroimage	(Intercept)	2.67693035932689	0.220673320334946	12.1307385743947	3.78741311745379e-33	2.24441859912153	3.10944211953226
citations	Neuroimage	preprintTRUE	0.479159244726439	0.0828937224850296	5.78040447891545	8.16266296392157e-09	0.316690534111323	0.641627955341555
citations	Neuroimage	ns(pub_date, df = 3)1	-1.01694856298721	0.0846407412464355	-12.0148825259731	1.45697222628664e-32	-1.18284136745499	-0.851055758519419
citations	Neuroimage	ns(pub_date, df = 3)2	-3.21167376770574	0.171436590915336	-18.7338872673444	2.04369501184577e-74	-3.54768331153212	-2.87566422387935
citations	Neuroimage	ns(pub_date, df = 3)3	-2.88694900708365	0.0702777417546118	-41.0791373627796	4.73872471936723e-297	-3.0246908498375	-2.74920716432981
citations	Neuroimage	log2(authors)	0.183558717155702	0.0260915084865153	7.03518990673037	2.4197545765312e-12	0.132420300219811	0.234697134091594
citations	Neuroimage	log2(references + 1)	0.218907722735508	0.0347916378272814	6.29196371329937	3.5577649680529e-10	0.150717365630875	0.287098079840141
citations	Neuroimage	any_affil_usaTRUE	0.0948153368425594	0.0408303953764075	2.32217532964046	0.0202854826288271	0.01478923243027	0.174841441254849
citations	Neuroimage	any_affil_nature_indexTRUE	0.111284023098077	0.0425819103474183	2.61341076974072	0.00900601432958038	0.0278250124242236	0.19474303377193
citations	Neuroimage	last_author_pub_age	-0.0094020353587298	0.00280764632316062	-3.34872497335981	0.000821168454349919	-0.0149049210334509	-0.00389914968400869
citations	Neuroimage	PC1	-0.0573335670753535	0.0113454973615329	-5.05342033481442	4.58132846524145e-07	-0.0795703332906521	-0.0350968008600549
citations	Neuroimage	PC2	-0.0826769326590243	0.0117394506263797	-7.04265772652436	2.29536175477567e-12	-0.105685833085015	-0.0596680322330339
citations	Neuroimage	PC3	-0.0819672599727085	0.013628678532948	-6.01432191496399	2.00885430661145e-09	-0.108678979054161	-0.0552555408912562
citations	Neuroimage	PC4	0.0428970581053341	0.0140400159793219	3.0553425415265	0.00226643242870109	0.0153791324434963	0.0704149837671719
citations	Neuroimage	PC5	0.0280277048000015	0.0146214316340243	1.91689196390185	0.0553399566373138	-0.000629774605100785	0.0566851842051039
citations	Neuroimage	PC6	-0.0315910691277241	0.0154366641278632	-2.04649585338209	0.0407885463405829	-0.0618463748597773	-0.00133576339567078
citations	Neuroimage	PC7	0.0312137543557047	0.0165774884271009	1.88290008422967	0.0598038703504139	-0.00127752591554261	0.063705034626952
citations	Neuroimage	PC8	0.00315733906254306	0.0166383306139913	0.189762971766412	0.849506818898328	-0.02945318970375	0.0357678678288361
citations	Neuroimage	PC9	0.0128445891695739	0.017216954020036	0.74604306630698	0.455695791822615	-0.0209000206331787	0.0465891989723265
citations	Neuroimage	PC10	0.0241489764351162	0.0176426671749769	1.36878263335191	0.171162591302977	-0.0104300158190656	0.058727968689298
citations	Neuroimage	PC11	0.0145060565356988	0.0178839707302526	0.811120570174065	0.41735630823813	-0.0205458819961648	0.0495579950675623
citations	Neuroimage	PC12	0.0129103153546868	0.0182597724151464	0.707035940052449	0.47959524233986	-0.0228781809448981	0.0486988116542717
citations	Neuroimage	PC13	-0.0125501038550092	0.0184665301396138	-0.679613536496883	0.496797987004061	-0.0487438378480757	0.0236436301380573
citations	Neuroimage	PC14	-0.00360793493916144	0.0191712256302301	-0.188195319837678	0.850735385247436	-0.0411828467139035	0.0339669768355807
citations	Neuroimage	PC15	-0.0773557541810605	0.0193613750418377	-3.99536468943469	6.60390199218692e-05	-0.115303351954235	-0.0394081564078859
citations	Neuron	(Intercept)	3.81348331479957	0.353072449204824	10.800852129324	4.61900676606478e-26	3.12147403042476	4.50549259917437
citations	Neuron	preprintTRUE	0.424123825234277	0.123123448948324	3.44470390374043	0.000590608490883995	0.182806299643206	0.665441350825348
citations	Neuron	ns(pub_date, df = 3)1	-0.879399259156182	0.112661854841955	-7.80565223597487	1.24343318804115e-14	-1.10021243707789	-0.658586081234471
citations	Neuron	ns(pub_date, df = 3)2	-3.21495962154411	0.219345056304164	-14.6570872200829	5.21599255557718e-45	-3.64486803208719	-2.78505121100104
citations	Neuron	ns(pub_date, df = 3)3	-3.05393620229912	0.0958463861406936	-31.8628205534659	1.31175706899726e-163	-3.2417916671832	-2.86608073741505
citations	Neuron	log2(authors)	0.221018975398752	0.030041757141059	7.35705885514529	3.39198767836928e-13	0.162138213369977	0.279899737427526
citations	Neuron	log2(references + 1)	0.217175207839969	0.0575747859108451	3.77205411021877	0.000169476941435025	0.104330701037108	0.330019714642829
citations	Neuron	any_affil_usaTRUE	0.150536819512357	0.0617194262890051	2.43905085584333	0.0148641538537131	0.0295689668394327	0.271504672185282
citations	Neuron	any_affil_nature_indexTRUE	0.099764506935932	0.0749324348394723	1.33139283608837	0.183302340883446	-0.0471003666233281	0.246629380495192
citations	Neuron	last_author_pub_age	-0.00336766420653778	0.00311387526107355	-1.08150260501339	0.279682033832222	-0.00947074757059219	0.00273541915751662
citations	Neuron	PC1	-0.0567950948452596	0.0127032500509149	-4.47091056364502	8.49493123669167e-06	-0.0816930074316595	-0.0318971822588598
citations	Neuron	PC2	-0.0275450711257421	0.0176758978786031	-1.55834070296852	0.119405433158098	-0.062189194362212	0.00709905211072789
citations	Neuron	PC3	-0.113602489129657	0.019056022119348	-5.96150069611399	3.24654036363446e-09	-0.150951606172178	-0.076253372087136
citations	Neuron	PC4	-0.0323679618112045	0.0197417605595108	-1.63956814862749	0.101346409572139	-0.071061101499259	0.0063251778768501
citations	Neuron	PC5	0.0213995732399909	0.0206609820947411	1.03574811409559	0.300519835372753	-0.0190952075509285	0.0618943540309103
citations	Neuron	PC6	0.0730713387027959	0.0212184322986477	3.44376708299288	0.000592639126994205	0.031483975589045	0.114658701816547
citations	Neuron	PC7	-0.097673683994436	0.0221554384163987	-4.40856471258728	1.12982110261818e-05	-0.141097545352273	-0.0542498226365994
citations	Neuron	PC8	-0.050191322296083	0.0225926590945367	-2.22157657874898	0.0264903445183773	-0.0944721204363662	-0.00591052415579971
citations	Neuron	PC9	0.0362251772387545	0.023092474469146	1.56870054299098	0.116970619350887	-0.00903524103468227	0.0814855955121912
citations	Neuron	PC10	-0.0127138984940834	0.0239668157534434	-0.530479252015646	0.595873839732312	-0.0596879941949396	0.0342601972067728
citations	Neuron	PC11	-0.0208114078592086	0.0242876459741058	-0.856872167907774	0.391679644860941	-0.0684143192377152	0.0267915035192981
citations	Neuron	PC12	-0.0481558191481238	0.0243445626421681	-1.97809341888572	0.0481372902332541	-0.0958702851461525	-0.000441353150095039
citations	Neuron	PC13	0.0118907524440561	0.0244771146733195	0.485790609013948	0.62720070581442	-0.036083510761107	0.0598650156492193
citations	Neuron	PC14	0.102547746753374	0.0249136262121837	4.11613090282394	4.10521271695329e-05	0.0537179366532008	0.151377556853547
citations	Neuron	PC15	-0.00753398631633271	0.0252150795603875	-0.298788917095804	0.765150731832789	-0.0569546341220042	0.0418866614893388
citations	Nucleic Acids Res	(Intercept)	3.84268797721998	0.223290099111622	17.2093970691421	1.82951525814806e-64	3.40504742485683	4.28032852958314
citations	Nucleic Acids Res	preprintTRUE	0.0898063817470033	0.0952848177091682	0.942504628818345	0.345981510018128	-0.0969484292364307	0.276561192730437
citations	Nucleic Acids Res	ns(pub_date, df = 3)1	-1.01749443540775	0.0876007997375297	-11.6151272414907	8.8318570284996e-31	-1.18918884791022	-0.845800022905288
citations	Nucleic Acids Res	ns(pub_date, df = 3)2	-2.68661427646845	0.183644767326699	-14.6294082623603	1.86700306437699e-47	-3.04655140637801	-2.32667714655888
citations	Nucleic Acids Res	ns(pub_date, df = 3)3	-2.45090334376178	0.0852547844403656	-28.7479859324042	6.66978053022072e-168	-2.61799965077462	-2.28380703674894
citations	Nucleic Acids Res	log2(authors)	0.273607963917906	0.0251600350320007	10.8747052048977	3.14066906756406e-27	0.224295201405419	0.322920726430393
citations	Nucleic Acids Res	log2(references + 1)	-0.024262298254692	0.0364849144356104	-0.664995344788619	0.506085240014092	-0.0957714165275139	0.0472468200181299
citations	Nucleic Acids Res	any_affil_usaTRUE	0.117220333233279	0.0414835452514555	2.82570673559214	0.00473702655132391	0.0359140785893889	0.19852658787717
citations	Nucleic Acids Res	any_affil_nature_indexTRUE	0.00745431544611445	0.0420171879047771	0.177411098120323	0.85919293437515	-0.0748978595789006	0.0898064904711295
citations	Nucleic Acids Res	last_author_pub_age	-0.00616384871408565	0.00249307110014829	-2.47239186789299	0.0134554446506866	-0.0110501782812739	-0.00127751914689736
citations	Nucleic Acids Res	PC1	-0.0903579955671198	0.0125531159490475	-7.19805313149964	7.04919479276262e-13	-0.114961650721008	-0.0657543404132313
citations	Nucleic Acids Res	PC2	0.24780597438104	0.0137543421561247	18.0165631746113	2.7705875893348e-70	0.220847959123995	0.274763989638086
citations	Nucleic Acids Res	PC3	0.0097407973941053	0.0153079249753985	0.636323826368357	0.524595549248887	-0.0202621842357169	0.0397437790239275
citations	Nucleic Acids Res	PC4	0.0185875129070364	0.015593614894975	1.1919951231466	0.233321756109813	-0.011975410675902	0.0491504364899749
citations	Nucleic Acids Res	PC5	-0.0063235739804898	0.0166893199597843	-0.378899439625311	0.704779205148761	-0.0390340400281326	0.026386892067153
citations	Nucleic Acids Res	PC6	-0.00620223273782882	0.0168638856291961	-0.36778194979519	0.71305195433711	-0.0392548412104557	0.0268503757347981
citations	Nucleic Acids Res	PC7	0.0648855693190164	0.0177261719727081	3.66043889334465	0.000254475625483531	0.0301429106687453	0.0996282279692875
citations	Nucleic Acids Res	PC8	-0.00525022415028794	0.0180565095641657	-0.290766281912389	0.771242566559103	-0.0406403325825557	0.0301398842819798
citations	Nucleic Acids Res	PC9	0.0380837140107908	0.0187199533029088	2.03439150699554	0.0419666915612345	0.0013932797448179	0.0747741482767638
citations	Nucleic Acids Res	PC10	0.107537355835046	0.0188885272659929	5.6932631284948	1.32007428064848e-08	0.0705165226726973	0.144558188997395
citations	Nucleic Acids Res	PC11	-0.125098386891253	0.01914648539964	-6.53375198006861	7.076006819221e-11	-0.162624808705069	-0.0875719650774363
citations	Nucleic Acids Res	PC12	-0.0485259876400778	0.0194434106932459	-2.49575490667048	0.0126020636939906	-0.0866343723354608	-0.0104176029446947
citations	Nucleic Acids Res	PC13	0.0794407616786917	0.0197247082736489	4.02747460578771	5.72449211071197e-05	0.0407810438567806	0.118100479500603
citations	Nucleic Acids Res	PC14	-0.0751320441020116	0.0199852690805241	-3.75937115478864	0.000172354965153562	-0.114302451721181	-0.0359616364828425
citations	Nucleic Acids Res	PC15	0.0977812885461015	0.0204235180854715	4.78768095373633	1.73763462646846e-06	0.0577519286609748	0.137810648431228
citations	PLoS Biol	(Intercept)	1.89317156441593	0.312148432275404	6.06497220125586	1.8958141057968e-09	1.28137187932549	2.50497124950636
citations	PLoS Biol	preprintTRUE	0.559267200282917	0.124204044415434	4.50280989572526	7.52966314019606e-06	0.315831746494453	0.802702654071382
citations	PLoS Biol	ns(pub_date, df = 3)1	-1.40820436163906	0.16748850151133	-8.40776739258006	1.49711898530414e-16	-1.73647579242585	-1.07993293085227
citations	PLoS Biol	ns(pub_date, df = 3)2	-3.26671212984934	0.347571825944312	-9.39866780333549	3.9197595710147e-20	-3.94794039074101	-2.58548386895766
citations	PLoS Biol	ns(pub_date, df = 3)3	-3.08370304893587	0.129921950974165	-23.7350426607207	2.35485945424499e-98	-3.33834539364641	-2.82906070422533
citations	PLoS Biol	log2(authors)	0.14737997719689	0.0365898214779313	4.02789549781706	6.07216308360745e-05	0.075665244899394	0.219094709494385
citations	PLoS Biol	log2(references + 1)	0.43309020663486	0.0507355582033602	8.53622630698043	5.36459973208184e-17	0.333650339820738	0.532530073448982
citations	PLoS Biol	any_affil_usaTRUE	0.050720424645033	0.0780320020990048	0.649995172245873	0.515850845172136	-0.10221948911057	0.203660338400636
citations	PLoS Biol	any_affil_nature_indexTRUE	0.318498008708192	0.0885131537747505	3.59831273799948	0.00033664592548593	0.145015415151625	0.491980602264758
citations	PLoS Biol	last_author_pub_age	-0.00458318268908448	0.00500940733175012	-0.914915155738247	0.360465915791023	-0.0144014406432056	0.00523507526503664
citations	PLoS Biol	PC1	0.137165416025173	0.0269660175666348	5.08660263556634	4.38334829501909e-07	0.0843129927880943	0.190017839262252
citations	PLoS Biol	PC2	0.00354091017902383	0.0295934683702315	0.119651746619389	0.904784060560589	-0.0544612220042551	0.0615430423623028
citations	PLoS Biol	PC3	-0.0451318284991689	0.0347804145515603	-1.29762192547369	0.194728996726384	-0.1133001883876	0.0230365313892622
citations	PLoS Biol	PC4	-0.0230510271499674	0.0358047207541769	-0.643798545678599	0.519859846854437	-0.0932269903046679	0.047124936004733
citations	PLoS Biol	PC5	0.153055505597424	0.0363481600860614	4.21081851832486	2.78367799879778e-05	0.0818144209244473	0.224296590270401
citations	PLoS Biol	PC6	-0.0404610771006401	0.0383622589320458	-1.05471049482024	0.291823117312358	-0.11564972297305	0.0347275687717696
citations	PLoS Biol	PC7	-0.0523943113623197	0.0393855855417106	-1.33029154300201	0.183738160181825	-0.129588640534094	0.0248000178094546
citations	PLoS Biol	PC8	-0.0710364370712351	0.0403868493801444	-1.75890019056944	0.0789130215147964	-0.150193207305362	0.00812033316289174
citations	PLoS Biol	PC9	0.0287439146624956	0.0422978939107633	0.679559004122928	0.496947553040541	-0.0541584340244966	0.111646263349488
citations	PLoS Biol	PC10	-0.0968912490183217	0.0423566636065734	-2.28750899547445	0.0223829072838932	-0.179908784192484	-0.0138737138441595
citations	PLoS Biol	PC11	0.0447414871927233	0.0473296154985651	0.94531693785004	0.34473495469841	-0.0480228545865929	0.13750582897204
citations	PLoS Biol	PC12	-0.018961671418125	0.0493500079078219	-0.38422833596182	0.700894308264389	-0.115685909554223	0.0777625667179726
citations	PLoS Biol	PC13	-0.0458189411505869	0.0517941080933842	-0.884636164947099	0.37657440013677	-0.147333527624995	0.0556956453238207
citations	PLoS Comput Biol	(Intercept)	1.6036443699845	0.279824875085987	5.73088568159539	1.13815131602913e-08	1.05519769283755	2.15209104713145
citations	PLoS Comput Biol	preprintTRUE	0.425336017805815	0.0708789377999968	6.00088024747225	2.29327226728742e-09	0.286415852455367	0.564256183156263
citations	PLoS Comput Biol	ns(pub_date, df = 3)1	-1.10432024543834	0.103047272015339	-10.7166373630343	3.78204369194699e-26	-1.30628918729351	-0.902351303583175
citations	PLoS Comput Biol	ns(pub_date, df = 3)2	-2.7131913765795	0.216832132679583	-12.5128657964585	9.7127239996105e-35	-3.13817454732249	-2.28820820583651
citations	PLoS Comput Biol	ns(pub_date, df = 3)3	-2.69433552451657	0.0903597402618409	-29.8178759335632	4.64874282040377e-164	-2.87143736108217	-2.51723368795097
citations	PLoS Comput Biol	log2(authors)	0.170616823088318	0.0325232238887269	5.24599970999359	1.70527033328117e-07	0.106872475605281	0.234361170571356
citations	PLoS Comput Biol	log2(references + 1)	0.343996287330898	0.0432602215227235	7.95179209034343	2.92868548073869e-15	0.259207811183135	0.42878476347866
citations	PLoS Comput Biol	any_affil_usaTRUE	0.0962528426927468	0.0497796495001637	1.93357815210069	0.0532948097697365	-0.00131347749060143	0.193819162876095
citations	PLoS Comput Biol	any_affil_nature_indexTRUE	0.214231083249026	0.0522040924373838	4.10372201194734	4.21568156213082e-05	0.111912942226154	0.316549224271898
citations	PLoS Comput Biol	last_author_pub_age	-0.00497986982483163	0.00355917663410841	-1.39916344052958	0.161906763961787	-0.0119557278423006	0.00199598819263735
citations	PLoS Comput Biol	PC1	-0.00780342266461395	0.0139739507601806	-0.558426374798037	0.576610826607957	-0.0351918628763041	0.0195850175470762
citations	PLoS Comput Biol	PC2	0.00603203529308641	0.0164046433870398	0.36770292110415	0.713130588704465	-0.0261204749247348	0.0381845455109076
citations	PLoS Comput Biol	PC3	-0.0711773259176238	0.018489027681468	-3.84970627681879	0.000121677554579451	-0.107415154282465	-0.0349394975527823
citations	PLoS Comput Biol	PC4	0.058281680780239	0.0202365853782055	2.88001556048124	0.00401551161954752	0.0186187022688864	0.0979446592915917
citations	PLoS Comput Biol	PC5	0.0858548454491283	0.0214173180024861	4.0086646441521	6.31234923813784e-05	0.0438776735188143	0.127832017379442
citations	PLoS Comput Biol	PC6	0.0247386054468905	0.0226242375581305	1.09345587374281	0.27431494811861	-0.0196040853447237	0.0690812962385048
citations	PLoS Comput Biol	PC7	-0.00736888614115154	0.0230916963223685	-0.319114110902863	0.749670669830043	-0.0526277792749299	0.0378900069926268
citations	PLoS Comput Biol	PC8	-0.0168519269365618	0.0239668250284916	-0.703135559947068	0.482046631422537	-0.0638260408161785	0.0301221869430548
citations	PLoS Comput Biol	PC9	-0.0360715477878844	0.0253825767525095	-1.42111449675093	0.155427026456987	-0.0858204840576267	0.013677388481858
citations	PLoS Comput Biol	PC10	-0.0248582650883475	0.0254207981682808	-0.977871148017877	0.32824695703996	-0.0746821139564395	0.0249655837797446
citations	PLoS Comput Biol	PC11	-0.0490228982440708	0.026326067772952	-1.86214282614732	0.0627179095880637	-0.100621042933617	0.00257524644547578
citations	PLoS Comput Biol	PC12	0.05802563888748	0.0265555671396312	2.18506494635859	0.0289906046951201	0.00597768370476759	0.110073594070192
citations	PLoS Comput Biol	PC13	-0.0140757694643628	0.027389755940002	-0.513906348606983	0.60736974505791	-0.0677587046521087	0.0396071657233831
citations	PLoS Comput Biol	PC14	0.0779229491411524	0.0283591759461767	2.74771556441004	0.0060507877238833	0.0223399856554115	0.133505912626893
citations	PLoS Comput Biol	PC15	-0.0152846117299687	0.0289320186235923	-0.528293995964217	0.597349269403033	-0.0719903262322518	0.0414211027723143
citations	PLoS Genet	(Intercept)	2.95381594076179	0.267577405120254	11.0391082514396	1.12864702714611e-27	2.42937386364941	3.47825801787417
citations	PLoS Genet	preprintTRUE	0.557299742613905	0.0668112488201198	8.34140586287137	1.21973142138108e-16	0.426352101164326	0.688247384063484
citations	PLoS Genet	ns(pub_date, df = 3)1	-0.81839418625706	0.0884139936064436	-9.25638751146081	4.53331882970863e-20	-0.991682429455044	-0.645105943059076
citations	PLoS Genet	ns(pub_date, df = 3)2	-3.01106351525027	0.162573293361459	-18.5212678724272	1.06226347151e-71	-3.3297013150868	-2.69242571541375
citations	PLoS Genet	ns(pub_date, df = 3)3	-2.82857327734216	0.0734830879483444	-38.4928472158183	5.23334824819628e-253	-2.9725974831937	-2.68454907149062
citations	PLoS Genet	log2(authors)	0.163145691657156	0.0232331566512513	7.02210612643415	2.8324411322961e-12	0.117609541373526	0.208681841940786
citations	PLoS Genet	log2(references + 1)	0.176293440132703	0.0423049241298081	4.16720851671464	3.19243286952043e-05	0.0933773124695797	0.259209567795826
citations	PLoS Genet	any_affil_usaTRUE	0.110370183322596	0.0427440605310393	2.58211742055832	0.00987822296201848	0.0265933641287591	0.194147002516433
citations	PLoS Genet	any_affil_nature_indexTRUE	0.0799970681449969	0.0468539691953368	1.7073701442771	0.0878822916157928	-0.0118350240106122	0.171829160300606
citations	PLoS Genet	last_author_pub_age	-0.00215251869591255	0.00257786464030589	-0.835000667706563	0.403800235566139	-0.00720504054793139	0.00290000315610629
citations	PLoS Genet	PC1	-0.0905644776745504	0.0115791668632808	-7.82132935330118	7.75732151626693e-15	-0.11325922769756	-0.0678697276515404
citations	PLoS Genet	PC2	0.0113251559735327	0.0122180234184154	0.926922103984763	0.35405994871496	-0.0126217298888284	0.0352720418358937
citations	PLoS Genet	PC3	-0.0723751831487718	0.0134167023726443	-5.39440923250557	7.54659468755432e-08	-0.0986714365904477	-0.0460789297070959
citations	PLoS Genet	PC4	-0.000189429189285105	0.0139441947278276	-0.0135848066512634	0.989162352193052	-0.0275195486492405	0.0271406902706703
citations	PLoS Genet	PC5	0.0645510927734601	0.0155517175466834	4.15073721469604	3.42933847922503e-05	0.0340702864842211	0.0950318990626991
citations	PLoS Genet	PC6	0.0523488052457696	0.016343564563191	3.20302251344053	0.00137769584935206	0.0203160073229102	0.0843816031686291
citations	PLoS Genet	PC7	-0.069408646221978	0.017772019006062	-3.9055014626252	9.66195286611897e-05	-0.104241163406421	-0.0345761290375351
citations	PLoS Genet	PC8	-0.0703985748663155	0.0179643815275146	-3.91878644742052	9.1478623673499e-05	-0.105608115664781	-0.0351890340678504
citations	PLoS Genet	PC9	0.0437065763596309	0.0190226846581223	2.29760294853908	0.0216698437623678	0.00642279954044866	0.0809903531788132
citations	PLoS Genet	PC10	0.0381157073660975	0.0193350877305937	1.97132321803678	0.0488013421452704	0.000219631776211517	0.0760117829559834
citations	PLoS Genet	PC11	-0.0218336260294594	0.0201473234702135	-1.08369858962849	0.278607045549324	-0.0613216544159563	0.0176544023570375
citations	PLoS Genet	PC12	-0.0300953557012766	0.0204434062580027	-1.47213019794564	0.141116510511802	-0.0701636956882825	0.00997298428572936
citations	PLoS Genet	PC13	-0.00580996463380206	0.0207507855043267	-0.279987696494219	0.779511013067858	-0.0464807568731982	0.0348608276055941
citations	PLoS Genet	PC14	-0.0128359605458984	0.0211553909170743	-0.606746554398983	0.544076368398683	-0.0542997648222297	0.028627843730433
citations	PLoS Genet	PC15	0.0316717950607916	0.021429363816354	1.47796245059879	0.139548718077714	-0.0103289862308681	0.0736725763524512
citations	PLoS Negl Trop Dis	(Intercept)	1.79200353643448	0.193729753663461	9.25001711171053	4.28861276095649e-20	1.41230019652028	2.17170687634868
citations	PLoS Negl Trop Dis	preprintTRUE	0.811759414531103	0.133471569482536	6.08189008099824	1.3472046608499e-09	0.550159945385297	1.07335888367691
citations	PLoS Negl Trop Dis	ns(pub_date, df = 3)1	-0.954983075754519	0.0767979243281857	-12.4350115463216	1.32453247783663e-34	-1.1055042415252	-0.804461909983843
citations	PLoS Negl Trop Dis	ns(pub_date, df = 3)2	-2.82348619671429	0.154527566736689	-18.271731422041	1.3376303816902e-70	-3.12635466213681	-2.52061773129177
citations	PLoS Negl Trop Dis	ns(pub_date, df = 3)3	-2.96809921518398	0.0643765414529373	-46.1052915890771	0	-3.09427491788099	-2.84192351248697
citations	PLoS Negl Trop Dis	log2(authors)	0.25177517037008	0.0254308429995118	9.90038632910885	9.6515507726272e-23	0.201931633994544	0.301618706745615
citations	PLoS Negl Trop Dis	log2(references + 1)	0.234705409782711	0.0313664928869462	7.48267938748067	9.6591341939228e-14	0.173228213402965	0.296182606162458
citations	PLoS Negl Trop Dis	any_affil_usaTRUE	0.14732790883775	0.0386425255156413	3.81258488858643	0.000140448218691472	0.0715899505554227	0.223065867120077
citations	PLoS Negl Trop Dis	any_affil_nature_indexTRUE	0.0965539558936111	0.0386348375813607	2.49914227516239	0.0125055597994525	0.0208310656855897	0.172276846101633
citations	PLoS Negl Trop Dis	last_author_pub_age	0.00224263990781514	0.0023266893925453	0.963875932473215	0.335190310503338	-0.00231758750478502	0.00680286732041529
citations	PLoS Negl Trop Dis	PC1	-0.00412719820554935	0.00790783391871941	-0.521912605647857	0.601771939693659	-0.0196262678819636	0.0113718714708649
citations	PLoS Negl Trop Dis	PC2	-0.0943310438333757	0.0127689173709302	-7.38755221708385	1.9565858582418e-13	-0.119357662001967	-0.0693044256647847
citations	PLoS Negl Trop Dis	PC3	0.0210663340775148	0.0137308477992271	1.53423403897177	0.125083630724758	-0.00584563308617141	0.047978301241201
citations	PLoS Negl Trop Dis	PC4	-0.0121294703712879	0.014587033587332	-0.831524127141356	0.405747608887652	-0.0407195308437347	0.0164605901011589
citations	PLoS Negl Trop Dis	PC5	0.047781554324826	0.0156176920748561	3.05945040379893	0.00223817184307576	0.0171714403364713	0.0783916683131806
citations	PLoS Negl Trop Dis	PC6	-0.0321059590482257	0.0162535681794094	-1.97531758527329	0.0483289365686487	-0.0639623673001343	-0.000249550796317069
citations	PLoS Negl Trop Dis	PC7	0.00950033250993831	0.0172872971888355	0.549555688559217	0.582667429326729	-0.0243821473702198	0.0433828123900964
citations	PLoS Negl Trop Dis	PC8	0.0665814496489062	0.0178342871628492	3.73333955211861	0.000192671673482628	0.0316268891197767	0.101536010178036
citations	PLoS Negl Trop Dis	PC9	0.0178511263408813	0.0183430514677583	0.973181936073088	0.330545883243406	-0.0181005939024895	0.0538028465842521
citations	PLoS Negl Trop Dis	PC10	0.0193059791872999	0.0196719783479558	0.981394898155023	0.32648175311605	-0.0192503898793452	0.0578623482539451
citations	PLoS Negl Trop Dis	PC11	-0.000968702909194633	0.0197537223535815	-0.0490390060088598	0.960891664183015	-0.0396852872828182	0.037747881464429
citations	PLoS Negl Trop Dis	PC12	-0.0109144204802972	0.0200580176074056	-0.544142531626232	0.586386170759873	-0.0502274125920826	0.0283985716314881
citations	PLoS Negl Trop Dis	PC13	0.00782165449610108	0.0206887930903336	0.378062386817315	0.705412543476304	-0.0327276348445538	0.048370943836756
citations	PLoS Negl Trop Dis	PC14	-0.0381501335203265	0.0215525658590657	-1.77009706267893	0.0768183950428532	-0.0803923863785229	0.0040921193378699
citations	PLoS Negl Trop Dis	PC15	0.0493177558217854	0.0217156830565664	2.27106629311726	0.023217616719997	0.00675579913122867	0.0918797125123421
citations	PLoS Pathog	(Intercept)	3.61219236187108	0.299956970654539	12.0423684570119	2.32007840756078e-32	3.02428750247644	4.20009722126571
citations	PLoS Pathog	preprintTRUE	0.426768088578662	0.110283728554348	3.86972851002539	0.000112224940153405	0.210615952531348	0.642920224625976
citations	PLoS Pathog	ns(pub_date, df = 3)1	-0.857969758231684	0.0886925148583336	-9.67353061982849	1.08090035374413e-21	-1.0318038930523	-0.684135623411066
citations	PLoS Pathog	ns(pub_date, df = 3)2	-2.77326548176237	0.173767316404376	-15.9596496000932	2.95329012484035e-54	-3.11384316360512	-2.43268779991961
citations	PLoS Pathog	ns(pub_date, df = 3)3	-3.03190741367115	0.0837969355807364	-36.1816024972653	5.61894727923725e-224	-3.19614638942422	-2.86766843791808
citations	PLoS Pathog	log2(authors)	0.153351101349648	0.0268160644928762	5.71862815255333	1.22476193895737e-08	0.100792580736507	0.205909621962789
citations	PLoS Pathog	log2(references + 1)	0.0825418847515666	0.0477120338141161	1.73000138860452	0.0837745431576496	-0.0109719831532582	0.176055752656391
citations	PLoS Pathog	any_affil_usaTRUE	0.131339219894796	0.0428901212152132	3.06222543032147	0.00222438469636291	0.0472761270204212	0.215402312769172
citations	PLoS Pathog	any_affil_nature_indexTRUE	0.0776681997710198	0.0462546201609272	1.6791446886992	0.0932701724320589	-0.0129891898629778	0.168325589405017
citations	PLoS Pathog	last_author_pub_age	-0.00058996115687657	0.00256733249725692	-0.229795383927449	0.818272784815837	-0.0056218403878394	0.00444191807408626
citations	PLoS Pathog	PC1	0.0197003920740488	0.0112177752254841	1.75617639666146	0.0792016585562096	-0.00228604335456561	0.0416868275026633
citations	PLoS Pathog	PC2	-0.0357488759247285	0.0142277064371362	-2.51262394839827	0.0120568680029817	-0.0636346681241241	-0.00786308372533297
citations	PLoS Pathog	PC3	-0.0340044395069247	0.0151386202611997	-2.24620466860366	0.0247927621594574	-0.0636755899945044	-0.00433328901934498
citations	PLoS Pathog	PC4	-0.00999900637815623	0.0159244285086498	-0.627903624467592	0.530134230368484	-0.0412103127294926	0.0212122999731802
citations	PLoS Pathog	PC5	0.00810779170531957	0.017767318153737	0.456331767977839	0.648197838897384	-0.0267155119778697	0.0429310953885088
citations	PLoS Pathog	PC6	-0.0138569904685592	0.0182802740209023	-0.758029691060137	0.448516869742732	-0.049685669177051	0.0219716882399325
citations	PLoS Pathog	PC7	0.0313971224608859	0.0184865454934454	1.69837693429625	0.0895823507565199	-0.00483584090482834	0.0676300858266001
citations	PLoS Pathog	PC8	-0.0271841723569623	0.019619162716107	-1.38559288947864	0.166015973542267	-0.065637024687363	0.0112686799734384
citations	PLoS Pathog	PC9	0.00562069855596637	0.0196411870811201	0.286168984224443	0.77477646162385	-0.0328753207366423	0.0441167178485751
citations	PLoS Pathog	PC10	0.0579680823801715	0.0200166565000593	2.89599226424252	0.00381805355416673	0.0187361565491457	0.0972000082111973
citations	PLoS Pathog	PC11	0.0371777959957204	0.0203574151789597	1.82625326785816	0.0679517094169665	-0.00272200457336964	0.0770775965648105
citations	PLoS Pathog	PC12	-0.0400168337303363	0.0205618687175659	-1.94616716408418	0.0517656984434423	-0.0803173558716062	0.000283688410933555
citations	PLoS Pathog	PC13	-0.0318346320643855	0.0211114873189826	-1.50792938381755	0.131720553686334	-0.0732123868696653	0.00954312274089441
citations	PLoS Pathog	PC14	0.0686418540843274	0.021227304967786	3.2336584502129	0.00124079952582878	0.0270371008586187	0.110246607310036
citations	PLoS Pathog	PC15	0.0257852117067182	0.021448890307715	1.202169964823	0.229431000731738	-0.0162538408047534	0.0678242642181899
citations	Syst Biol	(Intercept)	2.5543811981997	0.605346693876946	4.2196995936992	3.53776778231507e-05	1.3679234800405	3.74083891635891
citations	Syst Biol	preprintTRUE	0.715380198116605	0.240217637959825	2.97805025556137	0.00321573169049782	0.244562279264067	1.18619811696914
citations	Syst Biol	ns(pub_date, df = 3)1	-2.71552899395319	0.427766349343504	-6.34815945228215	1.17196453318456e-09	-3.55393563246464	-1.87712235544174
citations	Syst Biol	ns(pub_date, df = 3)2	-2.2217929900598	0.843293156029066	-2.63466266051758	0.00900202508517722	-3.87461720428589	-0.56896877583372
citations	Syst Biol	ns(pub_date, df = 3)3	-1.7587139859613	0.469425633115721	-3.74652311653324	0.000227423882837977	-2.67877132028803	-0.838656651634577
citations	Syst Biol	log2(authors)	0.1778032142607	0.103946939534367	1.71051899225869	0.0885361598434095	-0.0259290435298216	0.381535472051223
citations	Syst Biol	log2(references + 1)	0.248693050605776	0.0742171236260811	3.35088505799194	0.000943369251669123	0.1032301612625	0.394155939949051
citations	Syst Biol	any_affil_usaTRUE	0.344239854117199	0.196567479989944	1.75125536601888	0.0812525719460848	-0.0410253271948891	0.729505035429287
citations	Syst Biol	any_affil_nature_indexTRUE	0.160389952037671	0.195055041674936	0.822280473554561	0.411780167253337	-0.221910904648162	0.542690808723504
citations	Syst Biol	last_author_pub_age	0.0110002551033318	0.0174206244228244	0.631450103988198	0.528381603432889	-0.0231435413536029	0.0451440515602666
citations	Syst Biol	PC1	0.042303558832699	0.0674715195162283	0.626983935385123	0.531299846768087	-0.0899381894012999	0.174545307066698
citations	Syst Biol	PC2	0.09625831372017	0.0714487496429719	1.34723580470157	0.179247570134646	-0.0437786623204739	0.236295289760814
citations	Syst Biol	PC3	0.0299611572455486	0.0723222725173791	0.414272895508765	0.679065448503659	-0.111787892168605	0.171710206659703
citations	Syst Biol	PC4	0.0230425192519512	0.0784139002287925	0.293857583728379	0.769135236959194	-0.130645901083799	0.176730939587701
citations	Syst Biol	PC5	-0.0807692484755784	0.083284742178773	-0.969796464065471	0.333180128973605	-0.244004343607677	0.0824658466565206
citations	Syst Biol	PC6	0.00648776008953117	0.081335733187201	0.0797651885008406	0.936494286307806	-0.152927347613542	0.165902867792604
citations	Syst Biol	PC7	0.12583172441673	0.0874333624802053	1.43917288375154	0.151479018994562	-0.0455345170917076	0.297197965925168
citations	Syst Biol	PC8	0.00628375361390568	0.0868598962214126	0.0723435542438124	0.942392204757914	-0.16395851468095	0.176526021908761
citations	Syst Biol	PC9	-0.00312973479985226	0.0942662907957571	-0.0332009965962629	0.973543477913545	-0.187888269715716	0.181628800116011
citations	Syst Biol	PC10	-0.104932271065773	0.0956506076724215	-1.09703716075844	0.273787526796695	-0.29240401720309	0.0825394750715439
citations	Syst Biol	PC11	-0.125939340994881	0.0977312195516125	-1.28862958604923	0.198838678586728	-0.317489011481219	0.065610329491456
citations	Syst Biol	PC12	0.10211199701878	0.100620291819138	1.0148250931564	0.311269640139565	-0.0951001510606393	0.2993241450982
citations	Syst Biol	PC13	0.106268709946977	0.102912770711316	1.03260955090865	0.302885538624327	-0.0954366141964315	0.307974034090385
citations	Syst Biol	PC14	0.0977759610367361	0.106789248545374	0.9155974254767	0.360849691635923	-0.111527120048294	0.307079042121766
citations	Syst Biol	PC15	-0.1381933465057	0.11230417107547	-1.23052728302346	0.219773298086985	-0.358305477127246	0.0819187841158464
citations	eNeuro	(Intercept)	2.10980641693771	0.443644938966983	4.75561926131816	2.41448877686119e-06	1.24027831463895	2.97933451923646
citations	eNeuro	preprintTRUE	0.178766006785323	0.158646761663579	1.12681787457098	0.260215222457307	-0.132175932339202	0.489707945909848
citations	eNeuro	ns(pub_date, df = 3)1	-1.42328414275599	0.171482222164312	-8.29989327635501	5.56960358530788e-16	-1.75938312218694	-1.08718516332504
citations	eNeuro	ns(pub_date, df = 3)2	-3.13236771672652	0.4301644442923	-7.28179132024694	9.09758859408041e-13	-3.97547453496911	-2.28926089848392
citations	eNeuro	ns(pub_date, df = 3)3	-1.97882001996792	0.162605760608119	-12.1694336816079	5.62594135830746e-31	-2.29752145443858	-1.66011858549727
citations	eNeuro	log2(authors)	0.230125570707652	0.0554882335417368	4.1472859382802	3.78838350017656e-05	0.121370631400101	0.338880510015204
citations	eNeuro	log2(references + 1)	0.166735410705597	0.066132605659219	2.5212285081399	0.0119210810586236	0.0371178854097383	0.296352936001456
citations	eNeuro	any_affil_usaTRUE	0.0514696651605731	0.0892582115251626	0.576637872091616	0.564374096622876	-0.123473214753204	0.22641254507435
citations	eNeuro	any_affil_nature_indexTRUE	0.0624996591160995	0.0888269430571409	0.703611505305261	0.481914533552196	-0.111597950132687	0.236597268364886
citations	eNeuro	last_author_pub_age	0.00522031359856594	0.00501736342218346	1.04044956669576	0.298499246531978	-0.00461353800626228	0.0150541652033942
citations	eNeuro	PC1	-0.0136492084382895	0.0181866203546971	-0.750508240238507	0.453207131872829	-0.0492943293339989	0.0219959124574198
citations	eNeuro	PC2	-0.027316392521453	0.0311189324331253	-0.877806222310356	0.380357560381542	-0.088308379327714	0.0336755942848081
citations	eNeuro	PC3	0.0710261159355729	0.0296250462253732	2.39750228219866	0.016774841681283	0.0129620922935073	0.129090139577639
citations	eNeuro	PC4	-0.00275098435427746	0.032615420105233	-0.0843461266297188	0.932805955301813	-0.0666760331011776	0.0611740643926227
citations	eNeuro	PC5	-0.056513935067743	0.0340954048537383	-1.65752350823154	0.0978728865058448	-0.123339700619382	0.0103118304838961
citations	eNeuro	PC6	-0.00145339656249336	0.0352944114933705	-0.0411792264270041	0.967165048960131	-0.0706291719450361	0.0677223788200494
citations	eNeuro	PC7	0.0120454316881286	0.0366958896434937	0.328250161125724	0.742823129331929	-0.0598771903937754	0.0839680537700326
citations	eNeuro	PC8	-0.0724271241715972	0.0373426110909465	-1.93953025928486	0.0528482186283842	-0.145617296998538	0.000763048655343907
citations	eNeuro	PC9	-0.0365980499520476	0.0376559446028315	-0.971906304251775	0.331441228482014	-0.110402345177433	0.0372062452733376
citations	eNeuro	PC10	-0.00461871714863819	0.0389075366950783	-0.118710089123233	0.905539947810538	-0.0808760877981623	0.0716386535008859
citations	eNeuro	PC11	0.0214276683838974	0.0388535566572255	0.551498246941379	0.581472545575499	-0.054723903335551	0.0975792401033457
citations	eNeuro	PC12	-0.0333160974861689	0.0394638047910008	-0.84421909297925	0.398842581084916	-0.11066373356945	0.0440315385971119
citations	eNeuro	PC13	-0.012555811634378	0.0394786509039275	-0.318040544620762	0.75055139818714	-0.0899325455643056	0.0648209222955495
citations	eNeuro	PC14	-0.00249709728718012	0.0401930258607261	-0.062127626216371	0.950479372986555	-0.0812739804038903	0.0762797858295301
citations	eNeuro	PC15	0.0683500280784529	0.041376201797354	1.65191644252914	0.0990112136472912	-0.0127458372614224	0.149445893418328
Attention Score	Am J Hum Genet	(Intercept)	1.03720771119325	0.717693220512399	1.44519647329639	0.148863369356834	-0.369445152959615	2.44386057534612
Attention Score	Am J Hum Genet	preprintTRUE	0.629732159318904	0.259807700195186	2.42383947375618	0.0156172261903574	0.120518424030159	1.13894589460765
Attention Score	Am J Hum Genet	ns(pub_date, df = 3)1	0.620361684707884	0.321781935917109	1.92789468725084	0.0542843405858284	-0.0103193205652259	1.25104268998099
Attention Score	Am J Hum Genet	ns(pub_date, df = 3)2	0.537046274457774	0.597949687489047	0.898146258279651	0.369425474834929	-0.634913577587738	1.70900612650329
Attention Score	Am J Hum Genet	ns(pub_date, df = 3)3	0.0398625487814789	0.261220412071724	0.152601201664646	0.87875804502552	-0.472120050905812	0.55184514846877
Attention Score	Am J Hum Genet	log2(authors)	0.10932711603198	0.0678099948141552	1.61225666410402	0.107370087492564	-0.0235780315956115	0.242232263659572
Attention Score	Am J Hum Genet	log2(references + 1)	0.377301498662952	0.124050830169794	3.0415072446232	0.00244452061271617	0.134166339277861	0.620436658048044
Attention Score	Am J Hum Genet	any_affil_usaTRUE	0.0208897750494871	0.165606570219778	0.126140979924673	0.899657615362712	-0.303693138184482	0.345472688283456
Attention Score	Am J Hum Genet	any_affil_nature_indexTRUE	0.0962486997390958	0.237380001236971	0.405462546286757	0.685265079994541	-0.369007553335441	0.561504952813633
Attention Score	Am J Hum Genet	last_author_pub_age	-0.0143426293176728	0.0090077168641149	-1.59226022909437	0.111790963499164	-0.0319974299542721	0.00331217131892646
Attention Score	Am J Hum Genet	PC1	-0.0868307424323014	0.0365262698224934	-2.37721351931836	0.0177196300119014	-0.158420915773981	-0.0152405690906221
Attention Score	Am J Hum Genet	PC2	-0.0171219155169384	0.0440994002552535	-0.388257332703717	0.697947128322957	-0.103555151757052	0.069311320723175
Attention Score	Am J Hum Genet	PC3	-0.0254669646577551	0.0456624337168428	-0.557722455523904	0.57721747410853	-0.114963690189214	0.0640297608737043
Attention Score	Am J Hum Genet	PC4	-0.113460955011591	0.0481011608718134	-2.35879868500383	0.0186161149420839	-0.207737497934913	-0.0191844120882698
Attention Score	Am J Hum Genet	PC5	0.0271872215347262	0.0532477940982628	0.510579301830894	0.609811377010422	-0.0771765371540733	0.131550980223526
Attention Score	Am J Hum Genet	PC6	-0.13319193633546	0.0548703832877449	-2.42739212585759	0.0154664444307567	-0.240735911397349	-0.0256479612735716
Attention Score	Am J Hum Genet	PC7	-0.0967168208312861	0.0592201699782147	-1.63317364450094	0.102895384605109	-0.212786221146927	0.0193525794843548
Attention Score	Am J Hum Genet	PC8	-0.107333529537067	0.0595978414896136	-1.80096337139613	0.0721515940728127	-0.224143152413036	0.0094760933389028
Attention Score	Am J Hum Genet	PC9	-0.0255074215064193	0.0601575880332574	-0.424010043293589	0.671692585313309	-0.143414127448402	0.0923992844355628
Attention Score	Am J Hum Genet	PC10	-0.122861325439887	0.0618946011323216	-1.98500875992766	0.0475448679825688	-0.244172514496709	-0.00155013638306464
Attention Score	Am J Hum Genet	PC11	-0.0369691162020803	0.0619649120756848	-0.596613711916928	0.550963880710413	-0.158418112175614	0.0844798797714529
Attention Score	Am J Hum Genet	PC12	0.0580268966613382	0.0639008253636049	0.908077420458293	0.364159020781082	-0.067216419633711	0.183270212956387
Attention Score	Am J Hum Genet	PC13	-0.0647852903295213	0.0641502314790976	-1.00989955664666	0.31290262639879	-0.19051743362846	0.0609468529694176
Attention Score	Am J Hum Genet	PC14	-0.0157822458127085	0.0655879964354659	-0.240627045655178	0.809916714329498	-0.144332356644363	0.112767865018946
Attention Score	Am J Hum Genet	PC15	0.0139397575677519	0.0662214748667667	0.210502070450677	0.833338895709941	-0.115851948174235	0.143731463309739
Attention Score	BMC Bioinformatics	(Intercept)	0.926480873881857	0.238065816953076	3.89170056306097	0.000102666255220059	0.459880446703722	1.39308130105999
Attention Score	BMC Bioinformatics	preprintTRUE	0.480339206044565	0.109340721803179	4.39304952558491	1.17368460285509e-05	0.266035329266722	0.694643082822409
Attention Score	BMC Bioinformatics	ns(pub_date, df = 3)1	-0.431248018297008	0.112888089105867	-3.82013746279805	0.000137274557958891	-0.652504607228057	-0.20999142936596
Attention Score	BMC Bioinformatics	ns(pub_date, df = 3)2	-0.672771300633461	0.240612463824418	-2.79607834914321	0.00522006170277928	-1.14436306396077	-0.201179537306154
Attention Score	BMC Bioinformatics	ns(pub_date, df = 3)3	-0.556577750415306	0.0910910889565609	-6.11012291971528	1.18447328785391e-09	-0.7351130040827	-0.378042496747912
Attention Score	BMC Bioinformatics	log2(authors)	0.0217830443099244	0.0351371208418013	0.619943916520613	0.535362390660764	-0.0470844470604379	0.0906505356802867
Attention Score	BMC Bioinformatics	log2(references + 1)	0.135338091889152	0.0406612915399349	3.32842580163081	0.000888560992108711	0.0556434249059961	0.215032758872307
Attention Score	BMC Bioinformatics	any_affil_usaTRUE	0.145548398311891	0.0580138054621032	2.50885797186617	0.0121874722049959	0.0318434290000552	0.259253367623726
Attention Score	BMC Bioinformatics	any_affil_nature_indexTRUE	0.348458237877216	0.0581750170457637	5.98982614140189	2.46730277629379e-09	0.234437299667516	0.462479176086917
Attention Score	BMC Bioinformatics	last_author_pub_age	0.00432379285384064	0.0045142171278214	0.957816766764017	0.33826610379108	-0.00452391013508315	0.0131714958427644
Attention Score	BMC Bioinformatics	PC1	0.250944878854567	0.0188600217564079	13.3056516103597	7.8192403018267e-39	0.213979915464366	0.287909842244768
Attention Score	BMC Bioinformatics	PC2	-0.0905359050832036	0.0198460472489844	-4.56191119306323	5.36318883544261e-06	-0.129433442926693	-0.051638367239714
Attention Score	BMC Bioinformatics	PC3	0.114403999196481	0.020374368896958	5.6150941300352	2.22679302623752e-08	0.07447096995071	0.154337028442252
Attention Score	BMC Bioinformatics	PC4	-0.0995121935345014	0.0216919947981385	-4.58750771704228	4.7517989521389e-06	-0.142027722091683	-0.0569966649773197
Attention Score	BMC Bioinformatics	PC5	-0.0369458352873252	0.0230833963377325	-1.60053723233669	0.109630805071106	-0.0821884607501447	0.00829679017549433
Attention Score	BMC Bioinformatics	PC6	0.0636379045335406	0.0243151588815206	2.61721113333564	0.00892916659652648	0.0159810688473911	0.11129474021969
Attention Score	BMC Bioinformatics	PC7	0.0866092213710375	0.0245455493766478	3.52851020126019	0.000426944466617431	0.0385008286120583	0.134717614130017
Attention Score	BMC Bioinformatics	PC8	-0.0283796757084283	0.0247801541027346	-1.14525824136406	0.25223351152606	-0.0769478852811406	0.020188533864284
Attention Score	BMC Bioinformatics	PC9	-0.0185955354528703	0.0256469741693721	-0.725057674642856	0.468497932795212	-0.0688626811372687	0.0316716102315281
Attention Score	BMC Bioinformatics	PC10	-0.0713162528997117	0.0257571658559719	-2.76879270407683	0.00567617893986304	-0.121799370321241	-0.0208331354781821
Attention Score	BMC Bioinformatics	PC11	0.0260846103065055	0.0260831307667637	1.0000567240089	0.317398992117961	-0.0250373866004001	0.077206607213411
Attention Score	BMC Bioinformatics	PC12	-0.0345271790184294	0.026556285211103	-1.30015093391126	0.193692808489667	-0.086576541595365	0.0175221835585062
Attention Score	BMC Bioinformatics	PC13	0.0579147910913775	0.0272173771564172	2.12786084267207	0.0334655261643512	0.00456971211115666	0.111259870071598
Attention Score	BMC Bioinformatics	PC14	0.081995832483762	0.0273860581226172	2.99407209743868	0.00278515420539836	0.0283201448849118	0.135671520082612
Attention Score	BMC Bioinformatics	PC15	0.0666465907277218	0.0279893928351618	2.38113742303109	0.0173484890449192	0.0117883888216613	0.121504792633782
Attention Score	BMC Genomics	(Intercept)	0.399714757854941	0.21415301972206	1.86649134517791	0.0620446900915979	-0.0200174479807934	0.819446963690675
Attention Score	BMC Genomics	preprintTRUE	0.773095632254628	0.0974204489812595	7.93566074000897	2.68670306678124e-15	0.582155060893638	0.964036203615618
Attention Score	BMC Genomics	ns(pub_date, df = 3)1	-0.134964499363998	0.0842326251140258	-1.60228295368091	0.10917084556989	-0.300057410910753	0.0301284121827566
Attention Score	BMC Genomics	ns(pub_date, df = 3)2	0.349275173023069	0.184511184560954	1.89297561475296	0.0584321671789968	-0.0123601034612237	0.710910449507361
Attention Score	BMC Genomics	ns(pub_date, df = 3)3	-0.450267779720943	0.0695035103986111	-6.47834587258402	1.03807650750869e-10	-0.586492156901326	-0.31404340254056
Attention Score	BMC Genomics	log2(authors)	0.0336587418066409	0.0250973106776033	1.3411294237465	0.179953455360003	-0.0155310832302741	0.082848566843556
Attention Score	BMC Genomics	log2(references + 1)	0.108171812779367	0.0334868872061051	3.23027375203884	0.00124657945591788	0.0425387199010456	0.173804905657688
Attention Score	BMC Genomics	any_affil_usaTRUE	0.245688648906033	0.0414530961000164	5.92690708344787	3.34339082086198e-09	0.164442073502323	0.326935224309743
Attention Score	BMC Genomics	any_affil_nature_indexTRUE	0.300403980022099	0.0409222568811708	7.34084586034455	2.55070842721432e-13	0.220197830368908	0.38061012967529
Attention Score	BMC Genomics	last_author_pub_age	0.00103067434374211	0.00272866351154216	0.377721305460491	0.705657383612956	-0.00431740786480911	0.00637875655229334
Attention Score	BMC Genomics	PC1	0.0029379661098239	0.011344909256577	0.258967792811624	0.795673219049086	-0.0192976474409421	0.0251735796605899
Attention Score	BMC Genomics	PC2	0.144770045778114	0.0136947678054109	10.5711938920873	8.74188856940932e-26	0.11792879410287	0.171611297453359
Attention Score	BMC Genomics	PC3	-0.000429794682787643	0.0135277569857474	-0.0317713190176662	0.97465598088346	-0.0269437111664627	0.0260841218008874
Attention Score	BMC Genomics	PC4	0.0529463036561774	0.0147317041178164	3.5940379492244	0.000329458229493848	0.024072694154357	0.0818199131579979
Attention Score	BMC Genomics	PC5	0.0147608551541649	0.0154103035367012	0.957856223857658	0.33819229701792	-0.0154427847685996	0.0449644950769295
Attention Score	BMC Genomics	PC6	-0.0830124651705876	0.0170608464968625	-4.86567094931975	1.18397296787607e-06	-0.116451109850204	-0.0495738204909707
Attention Score	BMC Genomics	PC7	-0.0208425923510469	0.0175633131733832	-1.18671187749664	0.235410722557194	-0.0552660536200758	0.0135808689179819
Attention Score	BMC Genomics	PC8	0.0248479700656941	0.0175986340509574	1.4119260616333	0.158048369362948	-0.00964471885128274	0.0593406589826709
Attention Score	BMC Genomics	PC9	0.069231329338415	0.0182591860632683	3.79158901708585	0.000151861294182602	0.0334439822673935	0.105018676409437
Attention Score	BMC Genomics	PC10	-0.0210815932222528	0.018778547092099	-1.12264240246376	0.261655782865558	-0.0578868692047562	0.0157236827602505
Attention Score	BMC Genomics	PC11	0.0227916586938442	0.0189791480093605	1.20087891630348	0.229868228908995	-0.0144067878617574	0.0599901052494457
Attention Score	BMC Genomics	PC12	-0.0106419505393358	0.0195902292685596	-0.543227462703315	0.587003022563939	-0.049038094354595	0.0277541932759233
Attention Score	BMC Genomics	PC13	-0.0699996514370493	0.0196296556216458	-3.5660152570308	0.000366629043313229	-0.108473069484399	-0.0315262333896993
Attention Score	BMC Genomics	PC14	0.0744889626083689	0.0201299429421181	3.70040604797319	0.000218107296484756	0.0350349994309713	0.113942925785767
Attention Score	BMC Genomics	PC15	0.0229031453277969	0.0201784846662404	1.13502801159866	0.256430584982922	-0.016645957880628	0.0624522485362218
Attention Score	Bioinformatics	(Intercept)	2.5307505047371	0.160021722758114	15.81504348983	7.37699149896284e-54	2.21711369138714	2.84438731808705
Attention Score	Bioinformatics	preprintTRUE	0.653687222311169	0.0845835218783909	7.72830461293633	1.5458627626549e-14	0.487906565743967	0.819467878878371
Attention Score	Bioinformatics	ns(pub_date, df = 3)1	-2.07755107449073	0.119293853390713	-17.4154075456536	2.47695610681075e-64	-2.31136273071353	-1.84373941826793
Attention Score	Bioinformatics	ns(pub_date, df = 3)2	0.421848533620637	0.241084598178896	1.74979462316214	0.0802718610456618	-0.05066859603731	0.894365663278583
Attention Score	Bioinformatics	ns(pub_date, df = 3)3	-0.0717032524739926	0.142120747007433	-0.504523470244935	0.613936376627986	-0.35025479806449	0.206848293116505
Attention Score	Bioinformatics	log2(authors)	0.07915101122045	0.0343872621570308	2.30175379647858	0.0214278478316484	0.0117532158657325	0.146548806575167
Attention Score	Bioinformatics	log2(references + 1)	-0.0237958253041121	0.0258451713772553	-0.920706810443258	0.357289035251986	-0.0744514303777978	0.0268597797695737
Attention Score	Bioinformatics	any_affil_usaTRUE	-0.0142265468501815	0.0547370675979844	-0.259906996747948	0.794956116788231	-0.121509227961565	0.0930561342612022
Attention Score	Bioinformatics	any_affil_nature_indexTRUE	0.0767239361032467	0.0544936331627969	1.40794312381481	0.159267601077293	-0.0300816222825727	0.183529494489066
Attention Score	Bioinformatics	last_author_pub_age	-0.00927108596667975	0.00415603244401104	-2.23075399231776	0.0257825239759637	-0.0174167598755214	-0.00112541205783813
Attention Score	Bioinformatics	PC1	0.155211151362227	0.0186209088401774	8.33531556888005	1.23625806653656e-16	0.118714840676075	0.191707462048378
Attention Score	Bioinformatics	PC2	0.0260950331039297	0.0209977718744052	1.24275248154961	0.214071251909686	-0.0150598435254926	0.0672499097333519
Attention Score	Bioinformatics	PC3	-0.124677727072528	0.0229702487618249	-5.42779176513466	6.23345725957625e-08	-0.16969858736163	-0.0796568667834253
Attention Score	Bioinformatics	PC4	0.0299833249769641	0.0233294138900507	1.28521552741414	0.198831582595637	-0.0157414860279636	0.0757081359818919
Attention Score	Bioinformatics	PC5	0.039545389853969	0.0241496611940109	1.63751323615986	0.101644426175632	-0.00778707632513698	0.0868778560330749
Attention Score	Bioinformatics	PC6	0.0582673898748377	0.0256010258455019	2.27597871376218	0.0229283715544206	0.00809030125037499	0.1084444784993
Attention Score	Bioinformatics	PC7	-0.000116228388867134	0.0256033746220306	-0.0045395730282806	0.996378305872107	-0.0502979205307338	0.0500654637529996
Attention Score	Bioinformatics	PC8	0.00195498424064244	0.0265432054467506	0.0736529069393828	0.941292243934613	-0.050068742469236	0.0539787109505209
Attention Score	Bioinformatics	PC9	-0.0430021806235508	0.0273955009073422	-1.56968039274018	0.116611308148057	-0.0966963757403757	0.0106920144932742
Attention Score	Bioinformatics	PC10	-0.0240182440986943	0.0277972173506944	-0.864052102614303	0.38763906526088	-0.0784997889764871	0.0304633007790986
Attention Score	Bioinformatics	PC11	0.054934724684051	0.0280951940057117	1.95530682838079	0.050653973288977	-0.000130843705809458	0.110000293073911
Attention Score	Bioinformatics	PC12	0.0354688953870775	0.0285824175833453	1.24093405617812	0.214742194355888	-0.0205516136673636	0.0914894044415186
Attention Score	Bioinformatics	PC13	0.00380807974225482	0.0292675305710042	0.130112779177467	0.8964872765227	-0.0535552260933384	0.0611713855778481
Attention Score	Bioinformatics	PC14	-0.108869737022083	0.0299103086608621	-3.63987340473488	0.000278094764762003	-0.16749286476385	-0.0502466092803173
Attention Score	Bioinformatics	PC15	0.0476357242180495	0.0304850977537481	1.56259050250848	0.118270784214872	-0.0121139694444797	0.107385417880579
Attention Score	Biophys J	(Intercept)	0.650077597529642	0.34856840949531	1.86499286745717	0.0623395170418731	-0.0331039312295749	1.33325912628886
Attention Score	Biophys J	preprintTRUE	0.792554694731725	0.145666599664863	5.44088141382558	6.00254797892912e-08	0.507053405638179	1.07805598382527
Attention Score	Biophys J	ns(pub_date, df = 3)1	0.974128603287747	0.138049166041882	7.05638890272043	2.4007605538992e-12	0.703557209749869	1.24469999682563
Attention Score	Biophys J	ns(pub_date, df = 3)2	1.00428667884132	0.261986418713828	3.83335397220845	0.000130605469824368	0.490802733723586	1.51777062395905
Attention Score	Biophys J	ns(pub_date, df = 3)3	-0.109809022279672	0.125624879927202	-0.874102505358049	0.382175095014474	-0.356029262499157	0.136411217939814
Attention Score	Biophys J	log2(authors)	0.163310233897596	0.0433367438914502	3.76840111261371	0.000169408052407834	0.0783717766631177	0.248248691132075
Attention Score	Biophys J	log2(references + 1)	-0.0818045759750475	0.0573328485437456	-1.42683606436596	0.153794719879209	-0.194174894251879	0.0305657423017835
Attention Score	Biophys J	any_affil_usaTRUE	0.225987076039483	0.0637352912036912	3.5457133994611	0.000401222210549294	0.101068200736076	0.35090595134289
Attention Score	Biophys J	any_affil_nature_indexTRUE	0.0906698559781693	0.0650181565295425	1.39453132506105	0.163323478728103	-0.0367633891609217	0.21810310111726
Attention Score	Biophys J	last_author_pub_age	-0.00484492157583215	0.00401088314029745	-1.20794383839187	0.227222181337099	-0.0127061080770141	0.00301626492534976
Attention Score	Biophys J	PC1	-0.0551687889236045	0.0202723955525908	-2.72137492485707	0.00656160277316172	-0.0949019540870325	-0.0154356237601766
Attention Score	Biophys J	PC2	-0.0165745260347683	0.0236883531177168	-0.699690938935389	0.48420769007417	-0.0630028449985604	0.0298537929290237
Attention Score	Biophys J	PC3	0.0431258795115774	0.0252914247583706	1.70515816817731	0.0883316391815846	-0.0064444021325335	0.0926961611556884
Attention Score	Biophys J	PC4	0.0457882752728592	0.02626892354889	1.74305868253951	0.0814883434179962	-0.00569786879560127	0.0972744193413196
Attention Score	Biophys J	PC5	0.0371664446936046	0.0278434474809123	1.33483631001813	0.18209302478276	-0.017405709574416	0.0917385989616252
Attention Score	Biophys J	PC6	0.0426213399946584	0.027894747832766	1.52793422798374	0.126698623842098	-0.0120513611153897	0.0972940411047066
Attention Score	Biophys J	PC7	0.0110648102137062	0.0292120556698027	0.37877547334487	0.704897762641379	-0.0461897668134862	0.0683193872408986
Attention Score	Biophys J	PC8	0.0361313865583383	0.0294489743326119	1.2269149393881	0.220009589484297	-0.0215875425152254	0.093850315631902
Attention Score	Biophys J	PC9	-0.089577052519225	0.0300712275451956	-2.97882926078076	0.00293091444501301	-0.148515575478717	-0.0306385295597328
Attention Score	Biophys J	PC10	-0.0373719432420759	0.0303607977431086	-1.23092757832948	0.218505329718893	-0.0968780133604737	0.0221341268763219
Attention Score	Biophys J	PC11	0.0447448716146237	0.0311548388949874	1.43620937233679	0.151110663676898	-0.0163174905636992	0.105807233792947
Attention Score	Biophys J	PC12	0.0336414156529903	0.0322195274966997	1.04413125414196	0.296560129157974	-0.029507697839439	0.0967905291454197
Attention Score	Biophys J	PC13	0.0146310094900224	0.0320787466308836	0.45609666918646	0.648373626249071	-0.048242178575695	0.0775041975557398
Attention Score	Biophys J	PC14	0.0317010615016123	0.0328857312799647	0.963976176528749	0.335182976906226	-0.0327537874123808	0.0961559104156053
Attention Score	Biophys J	PC15	0.0108372767397139	0.0333584461708432	0.324873547293285	0.745313254077793	-0.0545440763353569	0.0762186298147847
Attention Score	Cell	(Intercept)	3.06624673562281	0.643494408686204	4.7649935947121	2.07606250731718e-06	1.80502087034495	4.32747260090067
Attention Score	Cell	preprintTRUE	0.0616867987045343	0.203645669845937	0.302912400500349	0.761999626010639	-0.337451379801037	0.460824977210105
Attention Score	Cell	ns(pub_date, df = 3)1	1.1159354220001	0.188152113067694	5.93102784659457	3.74962733883568e-09	0.747164056772314	1.48470678722789
Attention Score	Cell	ns(pub_date, df = 3)2	1.22513019749238	0.373262355652244	3.28222275549745	0.00105417637073733	0.493549423629399	1.95671097135536
Attention Score	Cell	ns(pub_date, df = 3)3	0.952982289755895	0.155407035315069	6.13216954962072	1.11286063338704e-09	0.648390097594216	1.25757448191757
Attention Score	Cell	log2(authors)	0.325014301468406	0.0435923059072567	7.45577217594037	1.52216314555631e-13	0.23957495188713	0.410453651049681
Attention Score	Cell	log2(references + 1)	0.243911878223078	0.103867870146091	2.34828997533129	0.018992178813727	0.040334593585856	0.4474891628603
Attention Score	Cell	any_affil_usaTRUE	0.213314812020837	0.108396978317385	1.96790367528745	0.0492674847919318	0.00086063848579207	0.425768985555881
Attention Score	Cell	any_affil_nature_indexTRUE	-0.0703101985126738	0.150247448637933	-0.467962678568392	0.639880886777737	-0.364789786612053	0.224169389586706
Attention Score	Cell	last_author_pub_age	-0.0183420701496758	0.00497921763489949	-3.68372533490314	0.000238212128348085	-0.0281011573852655	-0.00858298291408604
Attention Score	Cell	PC1	-0.135359135599582	0.0257632742396304	-5.25395702194425	1.70829589989797e-07	-0.185854225233086	-0.0848640459660775
Attention Score	Cell	PC2	-0.0264049885036451	0.0295130971094214	-0.894687141974532	0.371101318132702	-0.0842495959103443	0.0314396189030541
Attention Score	Cell	PC3	-0.0311218931715424	0.0361294978594508	-0.861398442143071	0.389159596867646	-0.101934407755583	0.0396906214124982
Attention Score	Cell	PC4	0.120360086242975	0.037952790037553	3.17131062364275	0.00154897507632333	0.0459739846565602	0.194746187829389
Attention Score	Cell	PC5	-0.106816235879033	0.0394705120289443	-2.70622878671306	0.0068841979370841	-0.184177017907119	-0.0294554538509472
Attention Score	Cell	PC6	-0.10604865468634	0.0416237668080092	-2.54779090934975	0.0109421363377555	-0.187629738530931	-0.024467570841748
Attention Score	Cell	PC7	-0.0692364860228831	0.0423627472647005	-1.63437195397796	0.102395620691269	-0.152265944947869	0.0137929729021027
Attention Score	Cell	PC8	-0.0225299595690534	0.043036588634534	-0.523507096725937	0.600700590304507	-0.106880123310206	0.0618202041720991
Attention Score	Cell	PC9	-0.0418775002399345	0.0434399992570202	-0.964030869157226	0.335189548288284	-0.127018334272141	0.0432633337922719
Attention Score	Cell	PC10	0.136884871656755	0.0446762709833692	3.06392786693659	0.00222437124662474	0.0493209895658	0.224448753747711
Attention Score	Cell	PC11	0.00729602599809201	0.0454203338199333	0.160633473699615	0.872404235367131	-0.0817261924547638	0.0963182444509479
Attention Score	Cell	PC12	-0.0536371106801593	0.0469008946055674	-1.14362660096876	0.252965359875147	-0.14556117494978	0.0382869535894617
Attention Score	Cell	PC13	-0.0972717086264619	0.0487161426825282	-1.99670382896197	0.046042118370549	-0.192753593749932	-0.00178982350299213
Attention Score	Cell	PC14	0.105289308110167	0.0503149112596066	2.09260645550803	0.0365559942149301	0.00667389415600869	0.203904722064324
Attention Score	Cell	PC15	0.103720134531884	0.0552696660994233	1.87661952480959	0.0607688950290648	-0.00460642046053983	0.212046689524308
Attention Score	Cell Rep	(Intercept)	1.60085515544614	0.46451218774792	3.44631464506349	0.000575790514076706	0.690427997080308	2.51128231381197
Attention Score	Cell Rep	preprintTRUE	0.76044978451476	0.21976140002441	3.46034282831423	0.000546719207200899	0.329725355274818	1.1911742137547
Attention Score	Cell Rep	ns(pub_date, df = 3)1	0.562132837914396	0.140487129851559	4.00131199568498	6.44548915115337e-05	0.286783123113939	0.837482552714853
Attention Score	Cell Rep	ns(pub_date, df = 3)2	0.459084404259337	0.345056777880028	1.33046047401206	0.183463740524639	-0.217214453006954	1.13538326152563
Attention Score	Cell Rep	ns(pub_date, df = 3)3	0.192633226596737	0.112754847810329	1.70842522816203	0.0876568388578562	-0.0283622141938033	0.413628667387277
Attention Score	Cell Rep	log2(authors)	0.234891514990847	0.0400034074156369	5.87178768424187	4.76409207390122e-09	0.156486277197316	0.313296752784378
Attention Score	Cell Rep	log2(references + 1)	0.147600490747241	0.0788022665044929	1.87304880042791	0.0611549891579978	-0.00684911350169196	0.302050094996174
Attention Score	Cell Rep	any_affil_usaTRUE	0.278565646934289	0.069402970348933	4.01374243110578	6.1167799517416e-05	0.142538324630279	0.414592969238298
Attention Score	Cell Rep	any_affil_nature_indexTRUE	-0.0280836797790003	0.0816411850083409	-0.343989124804241	0.730877623133084	-0.18809746205052	0.131930102492519
Attention Score	Cell Rep	last_author_pub_age	-0.0124244176382422	0.00404901299738217	-3.06850524961887	0.00216979028965744	-0.0203603372860459	-0.00448849799043862
Attention Score	Cell Rep	PC1	-0.0526757090089214	0.0211836610322311	-2.48661970793315	0.0129481838980558	-0.094194921692799	-0.0111564963250439
Attention Score	Cell Rep	PC2	-0.102703905956195	0.0272263921617509	-3.77221871138984	0.000164804162521152	-0.15606665402219	-0.0493411578901992
Attention Score	Cell Rep	PC3	0.0561846671668235	0.0295121738436272	1.9037793510069	0.0570307584179209	-0.00165813067217078	0.114027465005818
Attention Score	Cell Rep	PC4	-0.071973833453345	0.03020449705904	-2.38288468477589	0.0172370482832133	-0.131173559860209	-0.0127741070464806
Attention Score	Cell Rep	PC5	-0.0475252678486255	0.0309205702515765	-1.53701136369574	0.124391829285367	-0.108128471923156	0.013077936225905
Attention Score	Cell Rep	PC6	0.0413067531941587	0.0318411452885034	1.29727598740215	0.194632066476993	-0.0211007447978153	0.103714251186133
Attention Score	Cell Rep	PC7	0.0433201834196472	0.0322690757069302	1.34246743889053	0.179542054532159	-0.0199260427803323	0.106566409619627
Attention Score	Cell Rep	PC8	-0.0227262011975061	0.0326748785232588	-0.695525193194798	0.486777978562831	-0.0867677863023146	0.0413153839073023
Attention Score	Cell Rep	PC9	-0.0853569599311578	0.0332315516223015	-2.56855174568122	0.0102585188680057	-0.150489604261252	-0.0202243156010634
Attention Score	Cell Rep	PC10	-0.0889130110157458	0.0335573921218602	-2.64958047672082	0.008099795093132	-0.15468429098968	-0.0231417310418117
Attention Score	Cell Rep	PC11	0.118806544939506	0.0338165958268248	3.51326152247601	0.00044892183972834	0.0525272350391821	0.18508585483983
Attention Score	Cell Rep	PC12	-0.0901812657388648	0.0342393702679438	-2.63384708986006	0.00848400200837178	-0.157289198317366	-0.0230733331603634
Attention Score	Cell Rep	PC13	0.0154328670161638	0.0348187332111315	0.443234592211698	0.657626761776076	-0.0528105960649627	0.0836763300972902
Attention Score	Cell Rep	PC14	0.0237820219557742	0.0365969087429755	0.649836906247961	0.515845371068905	-0.0479466011259569	0.0955106450375052
Attention Score	Cell Rep	PC15	-0.114851726865772	0.0371942539048017	-3.08788898305995	0.00203354467441932	-0.187751124951021	-0.0419523287805222
Attention Score	Development	(Intercept)	2.28273364023874	0.233927608364264	9.75829084989466	8.3519193318464e-22	1.82424395285519	2.74122332762229
Attention Score	Development	preprintTRUE	0.845276671757466	0.185784438926652	4.54977110376388	5.83820746434521e-06	0.481145862573248	1.20940748094169
Attention Score	Development	ns(pub_date, df = 3)1	0.524554263925078	0.198610498796302	2.64112052033598	0.00835579257453973	0.13528483933279	0.913823688517366
Attention Score	Development	ns(pub_date, df = 3)2	0.112164098573147	0.420946895589008	0.266456647497546	0.78992703519641	-0.712876656185251	0.937204853331544
Attention Score	Development	ns(pub_date, df = 3)3	-0.346012177602518	0.163215559189167	-2.11997054276847	0.03418518330798	-0.665908795329852	-0.0261155598751845
Attention Score	Development	log2(authors)	0.0512876556194522	0.0561673973293486	0.913121455828137	0.361336902202608	-0.0587984202514222	0.161373731490327
Attention Score	Development	log2(references + 1)	-0.00708853025236443	0.0305327436820048	-0.232161587775756	0.816446661756935	-0.0669316082182867	0.0527545477135578
Attention Score	Development	any_affil_usaTRUE	-0.0741794476681645	0.0914767380344965	-0.810910503172849	0.417555789104783	-0.253470559638983	0.105111664302654
Attention Score	Development	any_affil_nature_indexTRUE	0.181840623880669	0.0974615407605925	1.86576799896226	0.0622841834155673	-0.00918048588787462	0.372861733649213
Attention Score	Development	last_author_pub_age	-0.0155190279903437	0.00565089685136017	-2.74629468534863	0.00610495630194147	-0.0265945822993604	-0.004443473681327
Attention Score	Development	PC1	0.0563492271338991	0.0257860717816894	2.18525829024926	0.0290362528793164	0.00580945513902335	0.106888999128775
Attention Score	Development	PC2	0.057309905157326	0.028229698619442	2.0301281260529	0.0425334862750652	0.00198071256879967	0.112639097745852
Attention Score	Development	PC3	0.176639155594275	0.0287425525647891	6.14556258342434	1.03864801835565e-09	0.120304787743539	0.232973523445011
Attention Score	Development	PC4	0.0330813730350118	0.0321918746628618	1.02763114548207	0.304302027306795	-0.0300135418990247	0.0961762879690484
Attention Score	Development	PC5	-0.0416019948753259	0.03267408480578	-1.27324132022717	0.203145159942493	-0.105642024322462	0.0224380345718103
Attention Score	Development	PC6	0.00400297085722919	0.0344117058035774	0.116325847956455	0.907411092432386	-0.0634427331643704	0.0714486748788288
Attention Score	Development	PC7	0.00455050356350259	0.0349880383853097	0.130058836491193	0.89653868178965	-0.0640247915614093	0.0731257986884145
Attention Score	Development	PC8	0.000321605512633766	0.0363321091371171	0.00885182611942591	0.992938626135033	-0.0708880198784943	0.0715312309037618
Attention Score	Development	PC9	-0.102780929060225	0.037154154603041	-2.76633744350659	0.00574400791005707	-0.175601733958218	-0.0299601241622315
Attention Score	Development	PC10	-0.0424600812705007	0.0385775412207501	-1.10064249630462	0.271242710772733	-0.11807067267528	0.0331505101342787
Attention Score	Development	PC11	-0.0340161300343093	0.0392011628601333	-0.867732678126824	0.385690363129198	-0.11084899739226	0.0428167373236412
Attention Score	Development	PC12	0.0251015616836881	0.0397861037469357	0.630912789132348	0.528201195628641	-0.0528777687454799	0.103080892112856
Attention Score	Development	PC13	-0.000666912061153155	0.0408810398865754	-0.0163134808459742	0.98698664228742	-0.0807922778893864	0.07945845376708
Attention Score	Development	PC14	-0.0136968766097608	0.041166533843154	-0.332718723950537	0.739396750027583	-0.0943818003106919	0.0669880470911703
Attention Score	Development	PC15	-0.0307951054833461	0.0420310715746023	-0.732674764874526	0.46388025892447	-0.113174492001192	0.0515842810344996
Attention Score	Elife	(Intercept)	2.31392157281299	0.329402160105114	7.02460958991466	2.47517789073147e-12	1.66830520257727	2.95953794304871
Attention Score	Elife	preprintTRUE	0.607025142540743	0.0883436021164411	6.87118396803262	7.25562105773322e-12	0.433874864127982	0.780175420953504
Attention Score	Elife	ns(pub_date, df = 3)1	0.359573438749827	0.130661860387701	2.75193876532064	0.00594855593110327	0.103480898236933	0.615665979262721
Attention Score	Elife	ns(pub_date, df = 3)2	0.104962452946778	0.306211036036912	0.342778151647432	0.731781685960945	-0.495200149354266	0.705125055247822
Attention Score	Elife	ns(pub_date, df = 3)3	0.0988813571606502	0.113712974652687	0.869569699171651	0.384582884823253	-0.123991977733531	0.321754692054832
Attention Score	Elife	log2(authors)	0.241141461099452	0.0358366255135238	6.72891092964241	1.92805162422197e-11	0.170902965765497	0.311379956433408
Attention Score	Elife	log2(references + 1)	0.0663650385073551	0.0533546793771494	1.24384663692268	0.213622063876788	-0.0382082114785396	0.17093828849325
Attention Score	Elife	any_affil_usaTRUE	0.0340743910637575	0.0668048959396841	0.51005829115462	0.610036127185038	-0.0968607989689695	0.165009581096484
Attention Score	Elife	any_affil_nature_indexTRUE	0.0714082050857651	0.0783378372353933	0.911541696909429	0.362059804208457	-0.0821311345223666	0.224947544693897
Attention Score	Elife	last_author_pub_age	-0.0198013532615148	0.00372754306309204	-5.31217290487566	1.13658235345245e-07	-0.0271072034159973	-0.0124955031070323
Attention Score	Elife	PC1	0.0262285589562721	0.0212108800926922	1.23656155905141	0.216315689194614	-0.0153440021058022	0.0678011200183464
Attention Score	Elife	PC2	0.246287506158644	0.0259298263148459	9.49823200387711	3.39819969235706e-21	0.195465980456167	0.297109031861121
Attention Score	Elife	PC3	0.14194250961118	0.0269821439575881	5.2606090099546	1.5037959835214e-07	0.0890584792286325	0.194826539993728
Attention Score	Elife	PC4	-0.235985350714904	0.0297588916287354	-7.92991061827837	2.75707571281857e-15	-0.294311706527056	-0.177658994902752
Attention Score	Elife	PC5	-0.0262799025610253	0.0301162456713315	-0.872615492907931	0.382920157936531	-0.0853066594263953	0.0327468543043447
Attention Score	Elife	PC6	-0.119816393630447	0.0317072408157109	-3.7788338104487	0.000159642714790772	-0.181961443678379	-0.0576713435825155
Attention Score	Elife	PC7	-0.228761174964885	0.0327731790815914	-6.98013379768152	3.38844974033832e-12	-0.292995425623686	-0.164526924306085
Attention Score	Elife	PC8	-0.211257556695081	0.033223800189521	-6.35862109361327	2.24205577387736e-10	-0.276375008496097	-0.146140104894065
Attention Score	Elife	PC9	0.0117308590332454	0.0337780875191932	0.347291984088197	0.728388529703357	-0.0544729759710152	0.077934694037506
Attention Score	Elife	PC10	0.025787431526863	0.035479853744625	0.726818991771342	0.467375389976851	-0.0437518039893506	0.0953266670430766
Attention Score	Elife	PC11	-0.0479277630199225	0.0394790281140976	-1.21400564576735	0.224810517557279	-0.125305236268198	0.0294497102283531
Attention Score	Elife	PC12	0.0340842498138886	0.0482967589605274	0.705725405751252	0.480396161129356	-0.0605756583187572	0.128744157946534
Attention Score	Elife	PC13	0.00475945365039571	0.0516445453746944	0.0921579155332796	0.926576756359151	-0.0964619952819498	0.105980902582741
Attention Score	Evolution	(Intercept)	1.72782432264107	0.55509030870427	3.11269048575948	0.00192208968552611	0.639867309413483	2.81578133586866
Attention Score	Evolution	preprintTRUE	0.243397119725487	0.198515324836656	1.22608730548012	0.220538716597476	-0.145685767333629	0.632480006784603
Attention Score	Evolution	ns(pub_date, df = 3)1	0.666193016937826	0.21244435139908	3.13584716444813	0.00177837353964631	0.249809739476658	1.08257629439899
Attention Score	Evolution	ns(pub_date, df = 3)2	0.294631582888814	0.417584240529935	0.705562026275015	0.480672834824067	-0.52381848906137	1.113081654839
Attention Score	Evolution	ns(pub_date, df = 3)3	0.496577033604298	0.201474271020235	2.46471686478729	0.0139282995186471	0.101694718593176	0.891459348615419
Attention Score	Evolution	log2(authors)	0.032292338798263	0.0645423915238574	0.500327583714131	0.6169866584886	-0.0942084240645808	0.158793101661107
Attention Score	Evolution	log2(references + 1)	0.20775578104207	0.0851765461280099	2.43911957559113	0.0149467692854054	0.0408128183036559	0.374698743780484
Attention Score	Evolution	any_affil_usaTRUE	0.0797730268578481	0.100926902570424	0.790403993644657	0.429533970467279	-0.118040067251365	0.277586120967062
Attention Score	Evolution	any_affil_nature_indexTRUE	0.0653796532234375	0.101570517208221	0.64368731222869	0.519968894238602	-0.133694902395781	0.264454208842656
Attention Score	Evolution	last_author_pub_age	-0.0194547608453157	0.00699774102516702	-2.78014873304794	0.00556530828387826	-0.0331700812277814	-0.00573944046284991
Attention Score	Evolution	PC1	-0.128816138665693	0.0341626243227775	-3.77067456670202	0.000175206968366608	-0.195773651955709	-0.0618586253756769
Attention Score	Evolution	PC2	0.10056771358236	0.0366555389291776	2.74358845948678	0.0062177848009255	0.0287241774472661	0.172411249717454
Attention Score	Evolution	PC3	0.0532692109398838	0.0386350275820296	1.37878019698014	0.168360865086252	-0.0224540516626058	0.128992473542373
Attention Score	Evolution	PC4	-0.0271164733799887	0.0423428941251676	-0.640401983384299	0.522100829450315	-0.11010702086651	0.0558740741065324
Attention Score	Evolution	PC5	-0.0330550448934365	0.0426675973555599	-0.774710715908854	0.438747212084152	-0.11668199901719	0.0505719092303173
Attention Score	Evolution	PC6	0.104355017461789	0.045420143950517	2.29754924545107	0.021853418000268	0.0153331711461512	0.193376863777427
Attention Score	Evolution	PC7	-0.0948740734223878	0.0462848104089651	-2.04978852854956	0.0407215444313804	-0.185590634855224	-0.00415751198955172
Attention Score	Evolution	PC8	0.0015084111156939	0.0478403601699574	0.0315300953072913	0.974854919974464	-0.0922569718248472	0.095273794056235
Attention Score	Evolution	PC9	0.0143145720436072	0.0479294314054486	0.298659333604779	0.765280152320373	-0.0796253873105551	0.10825453139777
Attention Score	Evolution	PC10	0.0543451333987236	0.0493001368487575	1.10233230316263	0.270659872509385	-0.0422813592577371	0.150971626055184
Attention Score	Evolution	PC11	-0.0312538399223286	0.0500240378752323	-0.624776432487928	0.532301931119386	-0.129299152519051	0.0667914726743942
Attention Score	Evolution	PC12	0.025127712667298	0.0510602634628418	0.492118742896505	0.62277494946267	-0.0749485647609982	0.125203990095594
Attention Score	Evolution	PC13	0.0406579900841569	0.0526342866886254	0.772462070678036	0.440076608084443	-0.0625033161775048	0.143819296345819
Attention Score	Evolution	PC14	0.0718590105684728	0.054052479190983	1.32943042842816	0.184097698259524	-0.0340819019209545	0.1777999230579
Attention Score	Evolution	PC15	0.0394811318279736	0.054517023807792	0.724198224157839	0.469162884553888	-0.0673702713796114	0.146332535035559
Attention Score	G3 (Bethesda)	(Intercept)	0.607321139200294	0.295385145354721	2.05603141779854	0.0399906513021283	0.0283768927369121	1.18626538566368
Attention Score	G3 (Bethesda)	preprintTRUE	0.680741405012634	0.10079054835453	6.7540202541426	2.21469072736852e-11	0.483195560255713	0.878287249769556
Attention Score	G3 (Bethesda)	ns(pub_date, df = 3)1	-0.9055891754457	0.162830028384963	-5.56156124535398	3.27878509528818e-08	-1.22473016668186	-0.586448184209538
Attention Score	G3 (Bethesda)	ns(pub_date, df = 3)2	0.801336262848974	0.354162390683907	2.26262382434665	0.0238331255301438	0.107190732429913	1.49548179326804
Attention Score	G3 (Bethesda)	ns(pub_date, df = 3)3	-0.463777405020553	0.146325172454765	-3.16949843448108	0.00156476757731662	-0.750569473063506	-0.176985336977601
Attention Score	G3 (Bethesda)	log2(authors)	0.137903995895417	0.042577616579326	3.2388848172957	0.00123213046383877	0.0544534008523824	0.221354590938451
Attention Score	G3 (Bethesda)	log2(references + 1)	0.13355699582254	0.0410945125998603	3.24999586010406	0.00118538448242856	0.0530132311645865	0.214100760480494
Attention Score	G3 (Bethesda)	any_affil_usaTRUE	0.252653781825178	0.0787429575351674	3.20858892952224	0.0013683886619672	0.0983204210200827	0.406987142630273
Attention Score	G3 (Bethesda)	any_affil_nature_indexTRUE	0.374917388676447	0.078875762217982	4.7532648577179	2.23816728223708e-06	0.220323735476057	0.529511041876837
Attention Score	G3 (Bethesda)	last_author_pub_age	-0.00665332616724119	0.00460460447081407	-1.44492892047792	0.148733175039989	-0.0156781850930889	0.0023715327586065
Attention Score	G3 (Bethesda)	PC1	0.00453978888719236	0.0197914388052684	0.229381447799738	0.818610683242583	-0.034250718373362	0.0433302961477468
Attention Score	G3 (Bethesda)	PC2	-0.073413437562076	0.0226346417176315	-3.24341063039182	0.0012128875871569	-0.117776520131602	-0.0290503549925505
Attention Score	G3 (Bethesda)	PC3	0.0924245970538537	0.0228376357864853	4.04702999548439	5.51160432033706e-05	0.0476636534202995	0.137185540687408
Attention Score	G3 (Bethesda)	PC4	0.0554585645280643	0.0261060036779339	2.12436055752726	0.033839516132029	0.00429173753904365	0.106625391517085
Attention Score	G3 (Bethesda)	PC5	-0.0756625003087698	0.0273045072170481	-2.77106265670044	0.00567174853756465	-0.129178351069798	-0.0221466495477415
Attention Score	G3 (Bethesda)	PC6	-0.0730974787842281	0.0277070268446507	-2.63822889384975	0.00843948112100684	-0.127402253518428	-0.0187927040500284
Attention Score	G3 (Bethesda)	PC7	0.00756563550147884	0.0307821241333962	0.245780163470614	0.805893518094438	-0.0527662191676189	0.0678974901705766
Attention Score	G3 (Bethesda)	PC8	-0.0792551498504376	0.0315379121460953	-2.51301194204925	0.0120978820316522	-0.141068321804373	-0.0174419778965024
Attention Score	G3 (Bethesda)	PC9	0.0530331550265999	0.0323160141312482	1.64107970776381	0.101037152467469	-0.010305068794534	0.116371378847734
Attention Score	G3 (Bethesda)	PC10	0.0832487503326369	0.0330115896371366	2.52180374370659	0.0118012463147291	0.0185472235714335	0.14795027709384
Attention Score	G3 (Bethesda)	PC11	-0.0150573736001318	0.0342785538957	-0.439265134869666	0.660546779323149	-0.082242104677819	0.0521273574775554
Attention Score	G3 (Bethesda)	PC12	-0.000943371876235608	0.0345654472688477	-0.0272923381809043	0.978231005903829	-0.0686904036326955	0.0668036598802243
Attention Score	G3 (Bethesda)	PC13	-0.00307987037874795	0.0353828840651883	-0.087044073995599	0.930650681491992	-0.0724290488156731	0.0662693080581772
Attention Score	G3 (Bethesda)	PC14	-0.015465105401732	0.0361054013377588	-0.428332183793197	0.668484467067163	-0.0862303916711036	0.0553001808676395
Attention Score	G3 (Bethesda)	PC15	0.0214025535083523	0.0362389709555343	0.590594957417901	0.554900605138518	-0.049624524401288	0.0924296314179926
Attention Score	Genetics	(Intercept)	1.46994211212517	0.46625468189221	3.15265919938792	0.00165875632671645	0.556099727993255	2.38378449625708
Attention Score	Genetics	preprintTRUE	0.624362405335072	0.120081961348826	5.19946874886031	2.35466173056499e-07	0.389006085898442	0.859718724771701
Attention Score	Genetics	ns(pub_date, df = 3)1	-0.364499243512076	0.192734646370765	-1.89119730352417	0.0588431725797612	-0.742252208971839	0.0132537219476874
Attention Score	Genetics	ns(pub_date, df = 3)2	-0.560474893216839	0.417274244837629	-1.34318113363295	0.1794720378764	-1.37831738477474	0.257367598341062
Attention Score	Genetics	ns(pub_date, df = 3)3	0.145542281224243	0.171082301384068	0.850715007027582	0.39510056688807	-0.189772867880758	0.480857430329244
Attention Score	Genetics	log2(authors)	0.0064754488856718	0.0544859278635081	0.118846262504575	0.905417418936044	-0.100315007391052	0.113265905162395
Attention Score	Genetics	log2(references + 1)	0.161379496157703	0.0749331094784335	2.15364739673789	0.0314702344891083	0.014513300330377	0.30824569198503
Attention Score	Genetics	any_affil_usaTRUE	0.267888473140059	0.0977666317389611	2.74008082691574	0.00623519302381353	0.0762693960419049	0.459507550238214
Attention Score	Genetics	any_affil_nature_indexTRUE	0.42363638104987	0.0983463834906104	4.30759491110638	1.78781010151482e-05	0.230881011398509	0.616391750701231
Attention Score	Genetics	last_author_pub_age	-0.00983873562779945	0.00552619935171345	-1.78038014946907	0.0752714464905421	-0.0206698873285464	0.000992416072947505
Attention Score	Genetics	PC1	-0.110152812189705	0.0252276271158185	-4.36635644264123	1.37433785063595e-05	-0.159598052752115	-0.0607075716272944
Attention Score	Genetics	PC2	0.0983679450680648	0.0277871687323019	3.5400492225649	0.000415654728445182	0.0439060951204156	0.152829795015714
Attention Score	Genetics	PC3	0.00767712429004338	0.0316082431397905	0.242883612862966	0.80813784373434	-0.0542738938785313	0.0696281424586181
Attention Score	Genetics	PC4	0.0191684973956545	0.0364192717323496	0.526328410313267	0.598759124686244	-0.0522119635429284	0.0905489583342373
Attention Score	Genetics	PC5	0.217926024345964	0.0365783346393912	5.95778967234008	3.37207404708784e-09	0.146233805838304	0.289618242853625
Attention Score	Genetics	PC6	-0.0883330580091156	0.0392247182911119	-2.2519743125633	0.0245074687398873	-0.165212093163424	-0.0114540228548069
Attention Score	Genetics	PC7	0.080720928917025	0.0406794819767535	1.98431555650471	0.0474524099900713	0.000990609332841938	0.160451248501208
Attention Score	Genetics	PC8	-0.012635137330943	0.0419905766534932	-0.300904115587846	0.763540711971024	-0.0949351552618582	0.0696648805999721
Attention Score	Genetics	PC9	-0.079278948794855	0.0424751567140225	-1.86647807631708	0.062222814279831	-0.162528726192034	0.0039708286023237
Attention Score	Genetics	PC10	0.0844689822270925	0.0436140007935597	1.9367400534272	0.0530160177449134	-0.00101288854998573	0.169950853004171
Attention Score	Genetics	PC11	-0.0940651794781052	0.0453185643008498	-2.07564341300947	0.0381434913366736	-0.182887933338833	-0.00524242561737692
Attention Score	Genetics	PC12	-0.103937406687581	0.0461486576539478	-2.25223033499631	0.0244912433919199	-0.194387113624187	-0.0134876997509745
Attention Score	Genetics	PC13	-0.0443085613772019	0.0468033081722019	-0.946697212388895	0.34398723999571	-0.136041359752047	0.047424236997643
Attention Score	Genetics	PC14	0.0770877815951278	0.0477683355337056	1.61378412569419	0.106842076968912	-0.0165364356523601	0.170711998842616
Attention Score	Genetics	PC15	-0.0620456260909311	0.0480846996772283	-1.29034030590638	0.197185743594086	-0.156289905665723	0.0321986534838611
Attention Score	Genome Biol	(Intercept)	2.90045260511192	0.608277002861181	4.76830883210927	2.26736690569589e-06	1.70825158688004	4.09265362334381
Attention Score	Genome Biol	preprintTRUE	0.550560622765333	0.14591959792139	3.7730409801563	0.000175123871385831	0.264563466200843	0.836557779329822
Attention Score	Genome Biol	ns(pub_date, df = 3)1	0.661746576643237	0.253004945649423	2.6155479883788	0.00910316828855197	0.165865995259853	1.15762715802662
Attention Score	Genome Biol	ns(pub_date, df = 3)2	0.370392461909409	0.49080266580676	0.754666768772688	0.450706438458584	-0.591563086588089	1.33234801040691
Attention Score	Genome Biol	ns(pub_date, df = 3)3	-0.424092225541176	0.192459186275838	-2.20354369021053	0.0278860735807499	-0.801305299135705	-0.0468791519466479
Attention Score	Genome Biol	log2(authors)	0.158117817006643	0.0558754979915453	2.82982385285529	0.00479274466948252	0.0486038533249738	0.267631780688312
Attention Score	Genome Biol	log2(references + 1)	0.0988728175187978	0.10150910598794	0.974029044552367	0.330383457165096	-0.100081374320423	0.297827009358018
Attention Score	Genome Biol	any_affil_usaTRUE	-0.00736161101827697	0.118132493515628	-0.0623165633704589	0.950328785051629	-0.23889704371282	0.224173821676266
Attention Score	Genome Biol	any_affil_nature_indexTRUE	0.152437809740337	0.137033158216403	1.11241550384182	0.266346955637103	-0.116142245051593	0.421017864532266
Attention Score	Genome Biol	last_author_pub_age	-0.010226299402253	0.00818398130900792	-1.2495506790805	0.211887412637604	-0.0262666080180575	0.00581400921355149
Attention Score	Genome Biol	PC1	0.0284670330631731	0.0343274257364968	0.829279576094373	0.40723301171826	-0.0388134850623339	0.0957475511886801
Attention Score	Genome Biol	PC2	0.0277451974245181	0.037284851049338	0.744141297166607	0.457044333593517	-0.0453317678011248	0.100822162650161
Attention Score	Genome Biol	PC3	-0.12064282825465	0.0363603903361293	-3.31797395845815	0.000954325369636894	-0.191907883777282	-0.0493777727320187
Attention Score	Genome Biol	PC4	0.112777965833888	0.0416158067475517	2.70997908362122	0.00689587544591797	0.0312124834211077	0.194343448246668
Attention Score	Genome Biol	PC5	0.112388312386279	0.0424165584799156	2.64963298329579	0.00824245148946095	0.0292533854175076	0.195523239355051
Attention Score	Genome Biol	PC6	-0.00744340686890874	0.045619679988773	-0.163162189448513	0.870438510567458	-0.0968563366331465	0.081969522895329
Attention Score	Genome Biol	PC7	0.0731234405451105	0.0472604238506672	1.5472447047061	0.122262757352659	-0.019505288096295	0.165752169186516
Attention Score	Genome Biol	PC8	0.115176204800597	0.0475663237679631	2.42138125625278	0.0157185265760197	0.0219479233384179	0.208404486262776
Attention Score	Genome Biol	PC9	-0.0127657517490676	0.0483876630191215	-0.263822448792845	0.791995506906186	-0.107603828562606	0.0820723250644711
Attention Score	Genome Biol	PC10	-0.0958082809672223	0.0499711511039223	-1.9172718428674	0.0556160235036977	-0.193749937396919	0.00213337546247439
Attention Score	Genome Biol	PC11	0.0379718911691013	0.0510897850154974	0.743238421488425	0.457590325433475	-0.0621622474391677	0.13810602977737
Attention Score	Genome Biol	PC12	-0.0378713057637746	0.0518644187497086	-0.730198210579337	0.465516871781664	-0.139523698592307	0.0637810870647581
Attention Score	Genome Biol	PC13	-0.0496745866451153	0.0536330705071311	-0.926193226966383	0.354669399656726	-0.15479347321939	0.055444299929159
Attention Score	Genome Biol	PC14	-0.0485425510492758	0.0537737096594371	-0.90271903048364	0.36699005288992	-0.153937085296886	0.0568519831983345
Attention Score	Genome Biol	PC15	0.0190655494943981	0.0546695420699526	0.348741708317269	0.727389614991813	-0.0880847840140062	0.126215883002802
Attention Score	Genome Biol Evol	(Intercept)	0.210916599656089	0.452619753355096	0.465990708740937	0.64133010801607	-0.6762018156113	1.09803501492348
Attention Score	Genome Biol Evol	preprintTRUE	0.481593502740629	0.144977686121178	3.32184569657219	0.000928707317260936	0.197442459381167	0.765744546100091
Attention Score	Genome Biol Evol	ns(pub_date, df = 3)1	0.345714453018354	0.184008044834609	1.87880075204913	0.0605809589586962	-0.0149346877231114	0.70636359375982
Attention Score	Genome Biol Evol	ns(pub_date, df = 3)2	0.799382287031254	0.394037468363184	2.02869612971542	0.0427707155110222	0.0270830404800736	1.57168153358244
Attention Score	Genome Biol Evol	ns(pub_date, df = 3)3	0.612099381166237	0.162982336466788	3.75561790581501	0.000183545485898102	0.292659871575143	0.931538890757331
Attention Score	Genome Biol Evol	log2(authors)	0.00861862020150407	0.0519052526430924	0.16604524133168	0.868157053161335	-0.0931138055874094	0.110351045990418
Attention Score	Genome Biol Evol	log2(references + 1)	0.300328133645171	0.0686086915170621	4.37740652101613	1.33562777404429e-05	0.165857569245311	0.434798698045032
Attention Score	Genome Biol Evol	any_affil_usaTRUE	0.163191765263265	0.10574894067741	1.54320000009348	0.123118823370349	-0.044072349867722	0.370455880394252
Attention Score	Genome Biol Evol	any_affil_nature_indexTRUE	0.296712050081478	0.088012720209981	3.371240536295	0.000778793952961679	0.124210288288515	0.469213811874441
Attention Score	Genome Biol Evol	last_author_pub_age	-0.00764245715794294	0.00559495674253017	-1.365954646235	0.172279909758885	-0.0186083708683616	0.00332345655247574
Attention Score	Genome Biol Evol	PC1	-0.0903087781831718	0.0318711510099754	-2.83355873011633	0.00470179649313178	-0.152775086308561	-0.0278424700577827
Attention Score	Genome Biol Evol	PC2	-0.0225262606766053	0.0337743189474567	-0.666964172146589	0.504958698345979	-0.0887227094159891	0.0436701880627785
Attention Score	Genome Biol Evol	PC3	-0.151816433966937	0.0345416232365635	-4.39517369890811	1.23294186262853e-05	-0.219516771478153	-0.0841160964557207
Attention Score	Genome Biol Evol	PC4	-0.00586912908807785	0.0360635018493138	-0.162744292348568	0.870754750061926	-0.0765522938691265	0.0648140356929708
Attention Score	Genome Biol Evol	PC5	-0.0728958236105253	0.0373284215028096	-1.95282363078328	0.0511369477368977	-0.146058185355763	0.000266538134711961
Attention Score	Genome Biol Evol	PC6	-0.0491283939577624	0.0398257631709082	-1.23358323974692	0.21766659998446	-0.127185455429564	0.0289286675140393
Attention Score	Genome Biol Evol	PC7	0.0408863358143219	0.0405615857071205	1.0080063464369	0.313710814409644	-0.038612911327469	0.120385582956113
Attention Score	Genome Biol Evol	PC8	-0.0102993363408373	0.0403020840694203	-0.255553442921134	0.798351579047026	-0.0892899696188067	0.068691296937132
Attention Score	Genome Biol Evol	PC9	0.0481601245663068	0.0411079568393393	1.1715523774273	0.241673683215772	-0.0324099903168253	0.128730239449439
Attention Score	Genome Biol Evol	PC10	0.0898496050350518	0.0411302411721778	2.1845144223426	0.029170877695434	0.00923581366213678	0.170463396407967
Attention Score	Genome Biol Evol	PC11	-0.057042954298863	0.0414096448679399	-1.3775282179014	0.168676880095441	-0.138204366852619	0.0241184582548929
Attention Score	Genome Biol Evol	PC12	0.027070532426824	0.0433591126458046	0.624333174157873	0.532560295654734	-0.0579117667605682	0.112052831614216
Attention Score	Genome Biol Evol	PC13	-0.0597780358602026	0.0437037634482435	-1.36780064561248	0.171701388100498	-0.145435838207618	0.0258797664872127
Attention Score	Genome Biol Evol	PC14	-0.116616612657387	0.0444963604527741	-2.62081238714248	0.0089136486575902	-0.203827876587937	-0.0294053487268377
Attention Score	Genome Biol Evol	PC15	-0.0247384878707992	0.0452007868434426	-0.547302151099347	0.584301078444038	-0.113330402156819	0.0638534264152202
Attention Score	Genome Res	(Intercept)	2.98909769612963	0.821564201442169	3.63830080580749	0.000297294643840799	1.37886145031557	4.59933394194369
Attention Score	Genome Res	preprintTRUE	0.463681510210435	0.149994104945559	3.09133155852179	0.00208200539108691	0.169698466623819	0.757664553797052
Attention Score	Genome Res	ns(pub_date, df = 3)1	0.258687595050554	0.269881073745943	0.958524402841504	0.338172017338926	-0.270269589600493	0.787644779701602
Attention Score	Genome Res	ns(pub_date, df = 3)2	0.420719870119464	0.546232650088642	0.770221022216797	0.441462169681897	-0.649876451234144	1.49131619147307
Attention Score	Genome Res	ns(pub_date, df = 3)3	-0.264624059584177	0.219223211675215	-1.20709872628007	0.227854446301965	-0.694293659042798	0.165045539874445
Attention Score	Genome Res	log2(authors)	0.291370194013243	0.0654202812405789	4.453820565854	1.00069163123593e-05	0.163148798923227	0.419591589103259
Attention Score	Genome Res	log2(references + 1)	-0.083898308181616	0.132824049080386	-0.631649981780336	0.527848436139347	-0.344228660659952	0.17643204429672
Attention Score	Genome Res	any_affil_usaTRUE	0.0759318465727902	0.13174293649692	0.576363701856347	0.564578544373704	-0.182279564178719	0.3341432573243
Attention Score	Genome Res	any_affil_nature_indexTRUE	0.222555418236853	0.152704960436467	1.4574210137034	0.145506495240483	-0.0767408044792352	0.521851640952941
Attention Score	Genome Res	last_author_pub_age	-0.0130693131360754	0.00804918653694688	-1.62368123487826	0.104952134435272	-0.028845428853336	0.00270680258118517
Attention Score	Genome Res	PC1	0.122207611734068	0.0369582779394884	3.30663706610352	0.000998776808270982	0.04977071804205	0.194644505426087
Attention Score	Genome Res	PC2	0.000119169411170544	0.041232431936359	0.00289018633085912	0.99769489782809	-0.0806949121790921	0.0809332510014332
Attention Score	Genome Res	PC3	0.0313080897671882	0.0452664771860616	0.691639635187438	0.489422570729019	-0.0574125752244966	0.120028754758873
Attention Score	Genome Res	PC4	-0.205792512902206	0.045522052011839	-4.5207213604669	7.38375140555829e-06	-0.295014095347769	-0.116570930456642
Attention Score	Genome Res	PC5	-0.0476899823274871	0.049300267081986	-0.967337200185529	0.333752672921706	-0.144316730236385	0.048936765581411
Attention Score	Genome Res	PC6	0.049926399900876	0.0513428913208859	0.972411148192706	0.331225263011608	-0.0507038179502144	0.150556617751966
Attention Score	Genome Res	PC7	0.035413588202602	0.0540790879858459	0.654848103427165	0.512808420183704	-0.0705794765664287	0.141406652971633
Attention Score	Genome Res	PC8	0.0360064529537993	0.0556809802810781	0.646656232919004	0.518093764478808	-0.0731262630209986	0.145139168928597
Attention Score	Genome Res	PC9	-0.0286273075600732	0.0563865550134869	-0.507697403276827	0.611846124791586	-0.139142924598794	0.0818883094786475
Attention Score	Genome Res	PC10	-0.19449148201116	0.0569843854856315	-3.41306623478813	0.000684213109831403	-0.306178825244144	-0.0828041387781748
Attention Score	Genome Res	PC11	-0.0595152280676585	0.0591946955311293	-1.0054148861423	0.315089338872746	-0.175534699384486	0.0565042432491691
Attention Score	Genome Res	PC12	-0.0273866420060213	0.0606048487961932	-0.451888628550485	0.65150725918265	-0.146169962935056	0.0913966789230131
Attention Score	Genome Res	PC13	-0.00775027787356285	0.0608028050857074	-0.127465794754668	0.898613074079535	-0.126921586000558	0.111421030253432
Attention Score	Genome Res	PC14	0.0508591100688341	0.0611920689300908	0.831138919766519	0.406215115982995	-0.0690751411736364	0.170793361311305
Attention Score	Genome Res	PC15	0.0419384852160162	0.0637164616322601	0.658204867967471	0.510650819921752	-0.0829434848055417	0.166820455237574
Attention Score	Gigascience	(Intercept)	3.78113429048632	0.498756578930857	7.58112163370682	3.41608047559951e-13	2.80358935872944	4.75867922224321
Attention Score	Gigascience	preprintTRUE	0.402845044008596	0.177447185534729	2.27022504073333	0.0238305859681609	0.0550549512025295	0.750635136814662
Attention Score	Gigascience	ns(pub_date, df = 3)1	-0.600726251097457	0.283578313617594	-2.11837867090055	0.0348810555491665	-1.15652953258454	-0.0449229696103689
Attention Score	Gigascience	ns(pub_date, df = 3)2	-1.06179538193165	0.767768814197554	-1.3829623739555	0.16760022886412	-2.56659460621188	0.44300384234858
Attention Score	Gigascience	ns(pub_date, df = 3)3	-0.341709199160841	0.273675531205766	-1.24859243957737	0.212688648168972	-0.87810338377401	0.194684985452329
Attention Score	Gigascience	log2(authors)	0.00065044639582171	0.0681181784242856	0.00954879315430744	0.992386981984528	-0.132858730008251	0.134159622799895
Attention Score	Gigascience	log2(references + 1)	0.0833585467646905	0.0849513956476549	0.981249879759823	0.327179762000467	-0.0831431291411258	0.249860222670507
Attention Score	Gigascience	any_affil_usaTRUE	0.00645323458656103	0.149390581744941	0.0431970644413101	0.965570257573218	-0.28634692526301	0.299253394436132
Attention Score	Gigascience	any_affil_nature_indexTRUE	0.181629150363116	0.147131868986925	1.23446505243032	0.217897471024657	-0.106744013829323	0.470002314555555
Attention Score	Gigascience	last_author_pub_age	-0.0166724794535171	0.0134662791941246	-1.2380910282026	0.216551854155899	-0.0430659016797624	0.00972094277272827
Attention Score	Gigascience	PC1	0.0581477634705293	0.0403942103295159	1.43950736989754	0.150943372066284	-0.0210234339592577	0.137318960900316
Attention Score	Gigascience	PC2	-0.093472677266288	0.0516297024600252	-1.81044384942292	0.0711254909777791	-0.194665034620456	0.00771968008788045
Attention Score	Gigascience	PC3	-0.00377554397330686	0.0517009245204586	-0.0730266239593614	0.941828643440387	-0.10510749400083	0.0975564060542158
Attention Score	Gigascience	PC4	0.105559648247645	0.0523910860424021	2.01483985581463	0.0447224065579207	0.00287500649359793	0.208244290001692
Attention Score	Gigascience	PC5	-0.0280455015452296	0.0574280916890738	-0.488358584106765	0.62561633544393	-0.140602492956678	0.0845114898662191
Attention Score	Gigascience	PC6	-0.162938879396131	0.058313459467012	-2.7941898986169	0.00550339363412115	-0.277231159765411	-0.0486465990268514
Attention Score	Gigascience	PC7	0.00398354595782196	0.0598090255084142	0.0666044284112526	0.946936470559664	-0.113239989989107	0.121207081904751
Attention Score	Gigascience	PC8	0.00920885335075677	0.0621810325774988	0.148097465883658	0.882355215932113	-0.112663731022653	0.131081437724166
Attention Score	Gigascience	PC9	0.147782830597045	0.0626145298161853	2.36020027669113	0.0188395367129992	0.0250606072484128	0.270505053945678
Attention Score	Gigascience	PC10	-0.0201004857507962	0.0677080872648643	-0.29686979152381	0.766750450746908	-0.152805898252025	0.112604926750433
Attention Score	Gigascience	PC11	0.00162379006388327	0.0675685771847904	0.0240317338552569	0.980841647010698	-0.130808187704921	0.134055767832687
Attention Score	Gigascience	PC12	0.0229157997868808	0.069753645765633	0.328524760754099	0.742720798951891	-0.113798833704125	0.159630433277886
Attention Score	Gigascience	PC13	0.067713123203886	0.070874740867403	0.955391474807196	0.340070730341274	-0.071198816309833	0.206625062717605
Attention Score	Gigascience	PC14	0.114920469497369	0.0752113603981601	1.52796690405536	0.127467195617139	-0.0324910881112872	0.262332027106025
Attention Score	Gigascience	PC15	-0.0336485137242023	0.077445592937997	-0.434479386724321	0.664220916247765	-0.185439086644026	0.118142059195621
Attention Score	ISME J	(Intercept)	3.08767995046376	0.481601092304454	6.41128103694544	2.35617836411614e-10	2.14375915463188	4.03160074629564
Attention Score	ISME J	preprintTRUE	0.273448609143734	0.197006262898714	1.38801987876051	0.165483897140498	-0.112676570866575	0.659573789154042
Attention Score	ISME J	ns(pub_date, df = 3)1	1.10580922366906	0.19348801784125	5.71513024944179	1.50234823051411e-08	0.726579677260168	1.48503877007796
Attention Score	ISME J	ns(pub_date, df = 3)2	2.05923552609846	0.392588048844879	5.24528327379652	1.95777513202506e-07	1.28977708960164	2.82869396259527
Attention Score	ISME J	ns(pub_date, df = 3)3	0.889353741573583	0.156551307264983	5.68090907135154	1.8230703327057e-08	0.582518817601553	1.19618866554561
Attention Score	ISME J	log2(authors)	0.104515059358652	0.0583422509388078	1.79141287277848	0.0735721653079567	-0.00983365125840906	0.218863769975714
Attention Score	ISME J	log2(references + 1)	-0.100350492819033	0.0754766178326029	-1.32955736095114	0.184010270574433	-0.248281945445828	0.0475809598077619
Attention Score	ISME J	any_affil_usaTRUE	0.180295523957112	0.0909345740920645	1.98269498435849	0.0477135178321418	0.00206703378717654	0.358524014127048
Attention Score	ISME J	any_affil_nature_indexTRUE	0.0955984723167285	0.0944937321864781	1.01169114717652	0.311965101772333	-0.0896058395335418	0.280802784166999
Attention Score	ISME J	last_author_pub_age	-0.0099941353260074	0.00637400163582727	-1.56795305320161	0.117253219783568	-0.0224869489696282	0.00249867831761343
Attention Score	ISME J	PC1	-0.0332647875853011	0.0280270341788829	-1.18688218571356	0.235595859395859	-0.0881967651693847	0.0216671899987824
Attention Score	ISME J	PC2	0.0556322619248399	0.0294377747104579	1.88982565672929	0.05911122586652	-0.00206471629266151	0.113329240142341
Attention Score	ISME J	PC3	-0.182020675576752	0.0318411316598878	-5.71652658332035	1.49050153691446e-08	-0.24442814685713	-0.119613204296373
Attention Score	ISME J	PC4	0.0650931921052576	0.0337383824318774	1.92935130297637	0.0540099647013081	-0.00103282235786094	0.131219206568376
Attention Score	ISME J	PC5	0.0263972796866571	0.0349715438782836	0.754821685268779	0.450558857161883	-0.042145686798541	0.0949402461718552
Attention Score	ISME J	PC6	0.0592104264706425	0.0383717315424045	1.54307413532301	0.12317393911393	-0.0159967853769098	0.134417638318195
Attention Score	ISME J	PC7	0.0226420198131926	0.0382731028231046	0.591590912235215	0.554277192134765	-0.0523718832966906	0.0976559229230758
Attention Score	ISME J	PC8	0.0571204477301196	0.0410981531935161	1.38985436793621	0.164926190989884	-0.0234304523602817	0.137671347820521
Attention Score	ISME J	PC9	0.051459099480199	0.0413133738744595	1.24557969137475	0.213251790635133	-0.0295136253935797	0.132431824353978
Attention Score	ISME J	PC10	0.133102706079006	0.0421167217567683	3.16032921193864	0.00163003565739387	0.0505554482888462	0.215649963869167
Attention Score	ISME J	PC11	0.0403703803154419	0.0433293522179609	0.93170975906507	0.351743245906801	-0.0445535895052121	0.125294350136096
Attention Score	ISME J	PC12	-0.0538232195672305	0.0437974818698042	-1.22891128141178	0.219435087105824	-0.139664706645593	0.0320182675111317
Attention Score	ISME J	PC13	-0.0203980282785915	0.0440915802534553	-0.462628650670623	0.643745459782985	-0.106815937596821	0.0660198810396382
Attention Score	ISME J	PC14	-0.00230191957784986	0.0454248553850404	-0.0506753309028243	0.959595786723815	-0.0913330001354693	0.0867291609797696
Attention Score	ISME J	PC15	-0.0442879945499611	0.0463408873111823	-0.955700184430308	0.339487387124827	-0.135114464691508	0.0465384755915854
Attention Score	J Biol Chem	(Intercept)	0.194112967036553	0.189402561051405	1.02486981146928	0.305457347078629	-0.177109231203849	0.565335165276955
Attention Score	J Biol Chem	preprintTRUE	0.630211656967971	0.16332814908566	3.85856118798878	0.000115003303028994	0.310094367098489	0.950328946837452
Attention Score	J Biol Chem	ns(pub_date, df = 3)1	0.457947633174851	0.0723284717357215	6.3314988162356	2.5663732713689e-10	0.316186433516013	0.599708832833688
Attention Score	J Biol Chem	ns(pub_date, df = 3)2	0.669211281204346	0.130655649126068	5.12194677903773	3.09855759915599e-07	0.413130914540551	0.92529164786814
Attention Score	J Biol Chem	ns(pub_date, df = 3)3	0.909909137550779	0.057519331040763	15.8191884551985	1.76195736743579e-55	0.797173320296047	1.02264495480551
Attention Score	J Biol Chem	log2(authors)	0.0533698677685676	0.0211643113093265	2.52169168127144	0.0116995414051098	0.011888579844694	0.0948511556924412
Attention Score	J Biol Chem	log2(references + 1)	0.109588514105231	0.0317504877032955	3.45155372507417	0.000560412226942218	0.0473587017151903	0.171818326495272
Attention Score	J Biol Chem	any_affil_usaTRUE	0.0178012226970867	0.0319917302954544	0.556432007043271	0.577932000045908	-0.0449014164851229	0.0805038618792963
Attention Score	J Biol Chem	any_affil_nature_indexTRUE	0.0566915255032738	0.0323794913515103	1.75084669761588	0.0800127965533813	-0.0067711113834126	0.12015416238996
Attention Score	J Biol Chem	last_author_pub_age	0.000641257235759379	0.00179354487737043	0.357536208795369	0.72070038519899	-0.00287402612854297	0.00415654060006173
Attention Score	J Biol Chem	PC1	0.0141362414022677	0.00863911891704856	1.63630591707345	0.10181712129667	-0.00279612053330613	0.0310686033378416
Attention Score	J Biol Chem	PC2	0.00919735158203971	0.0112313821003278	0.818897576440865	0.412870614095915	-0.0128157528312105	0.0312104559952899
Attention Score	J Biol Chem	PC3	-0.0405088266889246	0.0119917071126482	-3.37807005361215	0.000733643665343975	-0.0640121407428678	-0.0170055126349814
Attention Score	J Biol Chem	PC4	-0.00220384402757303	0.0130982103137573	-0.168255355104376	0.866386886493175	-0.0278758645044684	0.0234681764493223
Attention Score	J Biol Chem	PC5	0.0366174289076071	0.0144701118953973	2.53055602971905	0.0114082694933971	0.00825653074036369	0.0649783270748505
Attention Score	J Biol Chem	PC6	0.00144115094335745	0.0143791868801037	0.100224787074126	0.92016852016317	-0.0267415374686166	0.0296238393553316
Attention Score	J Biol Chem	PC7	0.0151172134635264	0.0145565580185392	1.03851566038298	0.299063195885316	-0.0134131159916783	0.043647542918731
Attention Score	J Biol Chem	PC8	0.0545587519793619	0.014777623870184	3.69198407393776	0.000224075128117555	0.0255951414167218	0.083522362542002
Attention Score	J Biol Chem	PC9	-0.0105402763378182	0.0148445718976876	-0.710042459322128	0.477699663542929	-0.0396351026232013	0.0185545499475648
Attention Score	J Biol Chem	PC10	0.0280062530535357	0.0151964603852097	1.84294581393397	0.0653759696575676	-0.00177826199396499	0.0577907681010363
Attention Score	J Biol Chem	PC11	0.0139756371988405	0.0152880919181784	0.91415182964871	0.360666167498479	-0.0159884723531271	0.0439397467508081
Attention Score	J Biol Chem	PC12	-0.00557364476670141	0.0156592516431458	-0.355933022453283	0.721900636563027	-0.0362652140121168	0.025117924478714
Attention Score	J Biol Chem	PC13	-0.0382511565038848	0.0157132152101817	-2.43433033865018	0.0149423162868956	-0.069048492397168	-0.00745382061060168
Attention Score	J Biol Chem	PC14	-0.0512431484234242	0.0158790477937802	-3.22709202018372	0.00125587211393085	-0.0823655102080236	-0.0201207866388247
Attention Score	J Biol Chem	PC15	0.0226416345741843	0.0163134465582703	1.38791238830558	0.165204545102801	-0.00933213314374431	0.0546154022921129
Attention Score	J Cell Biol	(Intercept)	1.84116726086126	0.656022959923288	2.80655918060635	0.00511633656931786	0.555385886380248	3.12694863534226
Attention Score	J Cell Biol	preprintTRUE	0.863689583104377	0.204382878727903	4.22584116869308	2.62511063590196e-05	0.46310650174107	1.26427266446768
Attention Score	J Cell Biol	ns(pub_date, df = 3)1	1.60087648718664	0.215572865504755	7.4261502413036	2.60962845705549e-13	1.17836143475323	2.02339153962006
Attention Score	J Cell Biol	ns(pub_date, df = 3)2	0.839622287260689	0.459368478276533	1.82777514558857	0.0679168426581444	-0.0607233857942855	1.73996796031566
Attention Score	J Cell Biol	ns(pub_date, df = 3)3	1.67997743235047	0.192513716913209	8.72653366880787	1.27159378055806e-17	1.30265748067064	2.0572973840303
Attention Score	J Cell Biol	log2(authors)	0.214513861452619	0.0636039826945505	3.37264825825126	0.000776490973353545	0.0898523460979912	0.339175376807247
Attention Score	J Cell Biol	log2(references + 1)	0.0684437291792403	0.105511663674037	0.648684010809336	0.516709416339919	-0.138355331570776	0.275242789929257
Attention Score	J Cell Biol	any_affil_usaTRUE	0.154039273216539	0.104199146569258	1.47831607348295	0.139675813910202	-0.0501873012790161	0.358265847712094
Attention Score	J Cell Biol	any_affil_nature_indexTRUE	0.0476573425231111	0.11229885393316	0.424379598312521	0.671391213993786	-0.172444366691007	0.26775905173723
Attention Score	J Cell Biol	last_author_pub_age	-0.012613088342079	0.00576748242300383	-2.18693138825551	0.0290063195917709	-0.0239171461726343	-0.0013090305115237
Attention Score	J Cell Biol	PC1	0.00587978576972812	0.0274154147030383	0.21447006486743	0.830229472376891	-0.0478534396694568	0.0596130112089131
Attention Score	J Cell Biol	PC2	0.0677946704601823	0.0288820952659182	2.34729059079665	0.0191280361168419	0.0111868039409279	0.124402536979437
Attention Score	J Cell Biol	PC3	0.0208513739981945	0.0287348154708905	0.72564843923629	0.46824444035389	-0.0354678294271553	0.0771705774235443
Attention Score	J Cell Biol	PC4	-0.00134891062158776	0.0301049948168202	-0.0448068710788847	0.964271265489453	-0.0603536162173204	0.0576557949741449
Attention Score	J Cell Biol	PC5	-0.00734511629393887	0.0350621678586802	-0.209488367163825	0.834114795891888	-0.07606570251685	0.0613754699289722
Attention Score	J Cell Biol	PC6	-0.0422201240662409	0.0361329674590959	-1.16846544956585	0.242930905660234	-0.113039438940627	0.0285991908081448
Attention Score	J Cell Biol	PC7	0.0855012369867166	0.0386515476392825	2.21210384082576	0.0272119243905118	0.00974559566698868	0.161256878306445
Attention Score	J Cell Biol	PC8	-0.104002265409959	0.0405569309645044	-2.56435245312281	0.0104993589482202	-0.183492389423865	-0.0245121413960535
Attention Score	J Cell Biol	PC9	-0.0324829420572386	0.0415863039067163	-0.781097116254963	0.434952394486032	-0.11399059996454	0.0490247158500628
Attention Score	J Cell Biol	PC10	0.026623078497072	0.042731317493797	0.623034347137476	0.533421028503518	-0.0571287648027164	0.11037492179686
Attention Score	J Cell Biol	PC11	-0.0423856647223085	0.0439918384091033	-0.963489280173789	0.335562869033175	-0.128608083617857	0.0438367541732397
Attention Score	J Cell Biol	PC12	-0.0985262547383239	0.0443181838449072	-2.22315641550474	0.026454877203762	-0.185388298934567	-0.0116642105420809
Attention Score	J Cell Biol	PC13	-0.0867772747941668	0.0446009493742992	-1.94563739139085	0.0520117684832195	-0.174193529244087	0.000638979655753907
Attention Score	J Cell Biol	PC14	0.106895636374998	0.0456591637012648	2.3411650085049	0.019442797626118	0.0174053199563009	0.196385952793696
Attention Score	J Cell Biol	PC15	0.0688170504621115	0.0465158985963068	1.47943074386991	0.139377894400218	-0.0223524354951671	0.15998653641939
Attention Score	J Neurophysiol	(Intercept)	0.440849820786294	0.299438486391311	1.47225504008922	0.141134649037472	-0.146038828125863	1.02773846969845
Attention Score	J Neurophysiol	preprintTRUE	0.317129202438999	0.166721084444527	1.9021541486225	0.0573176143023578	-0.00963811853573521	0.643896523413733
Attention Score	J Neurophysiol	ns(pub_date, df = 3)1	0.654547796177151	0.127380795634053	5.13851238657337	3.08390269314507e-07	0.404886024412351	0.904209567941951
Attention Score	J Neurophysiol	ns(pub_date, df = 3)2	0.89746100239179	0.236439847308835	3.79572653512815	0.000152306518513168	0.434047417156325	1.36087458762726
Attention Score	J Neurophysiol	ns(pub_date, df = 3)3	0.956607343509518	0.121829593123952	7.85201131334521	7.14022019827147e-15	0.717825728735403	1.19538895828363
Attention Score	J Neurophysiol	log2(authors)	0.17296576065145	0.0428071697730251	4.04057921998955	5.56649540238019e-05	0.0890652496162291	0.256866271686671
Attention Score	J Neurophysiol	log2(references + 1)	0.041973707350904	0.0487471822546951	0.861048893689876	0.389330919030412	-0.0535690142161085	0.137516428917916
Attention Score	J Neurophysiol	any_affil_usaTRUE	0.166425553512006	0.0639100994812876	2.60405718130253	0.00929190905535557	0.0411640602803107	0.291687046743702
Attention Score	J Neurophysiol	any_affil_nature_indexTRUE	0.116536889531379	0.0620999256981162	1.87660272087756	0.0607414540724272	-0.00517672827954188	0.2382505073423
Attention Score	J Neurophysiol	last_author_pub_age	-0.00723049615167695	0.00350405771597361	-2.06346377193389	0.0392180637126209	-0.0140983230747349	-0.00036266922861899
Attention Score	J Neurophysiol	PC1	0.122806121972282	0.0131768039458533	9.31987168337047	3.44272044403219e-20	0.0969800608070643	0.1486321831375
Attention Score	J Neurophysiol	PC2	0.0257707159533956	0.0186676038337868	1.38050476016385	0.16761034459009	-0.0108171152384883	0.0623585471452794
Attention Score	J Neurophysiol	PC3	-0.0740071111497277	0.0207989671535981	-3.55821087668408	0.000383500438541835	-0.114772337686412	-0.0332418846130438
Attention Score	J Neurophysiol	PC4	0.0126719958527952	0.0216995187044254	0.58397589482991	0.559312971896243	-0.0298582792897319	0.0552022709953223
Attention Score	J Neurophysiol	PC5	-0.0292707801087852	0.0236912606360732	-1.23550960661909	0.216809332841835	-0.0757047977038401	0.0171632374862697
Attention Score	J Neurophysiol	PC6	0.0272145959256302	0.0235719467419202	1.15453323493354	0.248441721612131	-0.0189855707340296	0.07341476258529
Attention Score	J Neurophysiol	PC7	-0.010728009776949	0.0247888985198941	-0.432774766831183	0.665232570214684	-0.0593133580923597	0.0378573385384617
Attention Score	J Neurophysiol	PC8	-0.0391962891466236	0.0251934460362934	-1.55581293206804	0.119936231816155	-0.0885745360242122	0.0101819577309649
Attention Score	J Neurophysiol	PC9	0.0394571456149735	0.0265079205404086	1.4885039946768	0.136801024826351	-0.0124974239492769	0.0914117151792239
Attention Score	J Neurophysiol	PC10	0.0066464523806494	0.0268217316366086	0.247801017126641	0.804317894429716	-0.0459231756301019	0.0592160803914007
Attention Score	J Neurophysiol	PC11	-0.00129915063379437	0.0272639485009545	-0.0476508614938476	0.962000018802787	-0.0547355077720199	0.0521372065044311
Attention Score	J Neurophysiol	PC12	-0.0129644141842279	0.0277964380295017	-0.46640559378393	0.640984169289776	-0.0674444316205508	0.0415156032520949
Attention Score	J Neurophysiol	PC13	0.00512757186734082	0.0285893711443703	0.1793523838439	0.857682105226025	-0.0509065659162737	0.0611617096509553
Attention Score	J Neurophysiol	PC14	0.0177490143387698	0.0293293388315416	0.605162442996569	0.545150760727261	-0.0397354334614237	0.0752334621389634
Attention Score	J Neurophysiol	PC15	0.0501249109040845	0.0297920597361996	1.68249229317901	0.0926546041301314	-0.00826645320413258	0.108516275012302
Attention Score	J Neurosci	(Intercept)	1.3852936387808	0.144315134266157	9.59908775905609	1.51520364039622e-21	1.10244117319507	1.66814610436653
Attention Score	J Neurosci	preprintTRUE	0.423870578114136	0.201214315958805	2.10656272688329	0.035229068010607	0.0294977656610158	0.818243390567256
Attention Score	J Neurosci	ns(pub_date, df = 3)1	0.588330745715804	0.132717992015789	4.43293887121055	9.59144031197496e-06	0.328208261264383	0.848453230167225
Attention Score	J Neurosci	ns(pub_date, df = 3)2	2.14254028702505	0.228759286809556	9.3659160985614	1.33657827319395e-20	1.69418032374925	2.59090025030085
Attention Score	J Neurosci	ns(pub_date, df = 3)3	0.361200321808273	0.117687177188468	3.06915613440056	0.00216368772915924	0.130537693076692	0.591862950539855
Attention Score	J Neurosci	log2(authors)	0.100211114938915	0.0406935566941302	2.46257941256263	0.0138437209821567	0.0204532094155811	0.179969020462249
Attention Score	J Neurosci	log2(references + 1)	0.00926108057765843	0.0132912396901067	0.696780796493491	0.485987930425073	-0.01678927052484	0.0353114316801568
Attention Score	J Neurosci	any_affil_usaTRUE	0.239258267378473	0.0776063002404966	3.08297479247211	0.00206596809509798	0.087152713933698	0.391363820823249
Attention Score	J Neurosci	any_affil_nature_indexTRUE	0.0742244630679032	0.0662074302935927	1.12108962300393	0.262329406068118	-0.0555397158164847	0.203988641952291
Attention Score	J Neurosci	last_author_pub_age	-0.00600190633987324	0.00367632443953497	-1.63258342363071	0.102649842130616	-0.0132073698368462	0.0012035571570997
Attention Score	J Neurosci	PC1	-0.208994300003303	0.0128009829401367	-16.3264259456212	9.84075195081128e-58	-0.234083765532682	-0.183904834473923
Attention Score	J Neurosci	PC2	0.0422833491479926	0.0202314414489526	2.08998203388922	0.036694017993676	0.00263045255271476	0.0819362457432705
Attention Score	J Neurosci	PC3	-0.168792560483412	0.0230871549569206	-7.31110268018603	3.2918109250485e-13	-0.214042552704472	-0.123542568262353
Attention Score	J Neurosci	PC4	-0.0164400214442348	0.0237471803163844	-0.692293620766922	0.488800539507869	-0.0629836395987267	0.0301035967102572
Attention Score	J Neurosci	PC5	-0.112729226179219	0.0254738434337782	-4.42529320211415	9.93548464033518e-06	-0.162657041857237	-0.0628014105012016
Attention Score	J Neurosci	PC6	-0.0709380543677834	0.0254959122216531	-2.78233050659537	0.00542697996823633	-0.120909124075218	-0.0209669846603486
Attention Score	J Neurosci	PC7	0.0897841639986221	0.0262200109280881	3.42426112044221	0.000623816892388385	0.0383938869053227	0.141174441091921
Attention Score	J Neurosci	PC8	0.023426218863087	0.0265683051870478	0.881735537820734	0.377982572721674	-0.0286467024337954	0.0754991401599694
Attention Score	J Neurosci	PC9	0.091657672825539	0.0273230133597767	3.35459605493119	0.000803578371643258	0.03810555069127	0.145209794959808
Attention Score	J Neurosci	PC10	-0.0144385932321151	0.0280308092533533	-0.5150972667829	0.606518756229308	-0.0693779698261997	0.0405007833619695
Attention Score	J Neurosci	PC11	-0.14433218759637	0.0290316815465961	-4.97154074126625	6.97294678687939e-07	-0.201233237838335	-0.0874311373544057
Attention Score	J Neurosci	PC12	-0.0701940176325822	0.0294960655545742	-2.37977561796192	0.0173783782113111	-0.12800524380518	-0.0123827914599843
Attention Score	J Neurosci	PC13	-0.157981976007242	0.0299300667008478	-5.27837032861563	1.38561504885759e-07	-0.216643828795785	-0.0993201232186984
Attention Score	J Neurosci	PC14	0.0707527903415562	0.0301966352329249	2.34306868284486	0.0191835819041066	0.0115684728307301	0.129937107852382
Attention Score	J Neurosci	PC15	0.126658234114244	0.0307566316899471	4.11807883877098	3.91193848184497e-05	0.0663763437161844	0.186940124512303
Attention Score	J Virol	(Intercept)	0.424803305052099	0.282748305343055	1.50240796151436	0.133091323142672	-0.129373190110023	0.978979800214222
Attention Score	J Virol	preprintTRUE	0.940919826534785	0.197717366506355	4.75891340837044	2.03338623017253e-06	0.553400909064224	1.32843874400535
Attention Score	J Virol	ns(pub_date, df = 3)1	0.230348004839139	0.106636604522069	2.16012133799203	0.0308379571600931	0.0213441005422424	0.439351909136037
Attention Score	J Virol	ns(pub_date, df = 3)2	1.01273371253544	0.203532400897546	4.97578620440503	6.84443517634554e-07	0.613817537089285	1.4116498879816
Attention Score	J Virol	ns(pub_date, df = 3)3	0.279282986398462	0.0906319626532569	3.08150654826877	0.00207723545890341	0.101647603749899	0.456918369047025
Attention Score	J Virol	log2(authors)	0.18339407087509	0.0323378811244202	5.67118390254081	1.54543888975748e-08	0.120012988534889	0.246775153215292
Attention Score	J Virol	log2(references + 1)	-0.0276166173360615	0.0463721148091732	-0.595543624648286	0.551522634495824	-0.118504292248997	0.0632710575768744
Attention Score	J Virol	any_affil_usaTRUE	0.137130221158804	0.0506357053555975	2.7081724288382	0.00680179493877639	0.0378860623300508	0.236374379987557
Attention Score	J Virol	any_affil_nature_indexTRUE	0.143263310267635	0.0508724449226275	2.81612787601471	0.00489066621829848	0.0435551504137871	0.242971470121482
Attention Score	J Virol	last_author_pub_age	-0.00190992300558167	0.00277779821477912	-0.687567223356985	0.491775624597189	-0.00735430746286841	0.00353446145170507
Attention Score	J Virol	PC1	-0.0293394449297165	0.0150599947263218	-1.9481709962645	0.0514825887694049	-0.0588564922006703	0.000177602341237391
Attention Score	J Virol	PC2	-0.0675404806901837	0.0162379801941965	-4.15941391000852	3.27525831368567e-05	-0.0993663370524836	-0.0357146243278839
Attention Score	J Virol	PC3	-0.11966593403729	0.0168247025870894	-7.11251407969118	1.40212960144415e-12	-0.152641745158583	-0.0866901229159968
Attention Score	J Virol	PC4	0.0154957085467194	0.0173141244468601	0.894975001148815	0.370868357050546	-0.0184393517929709	0.0494307688864097
Attention Score	J Virol	PC5	0.111260041074793	0.0190491035448569	5.84069695525551	5.72408289985488e-09	0.0739244841890989	0.148595597960487
Attention Score	J Virol	PC6	0.0798250511009116	0.0202141659487858	3.94896585410225	8.01957002644368e-05	0.0402060138637754	0.119444088338048
Attention Score	J Virol	PC7	0.0106159008114996	0.0203257941169016	0.522287136750641	0.601506895595357	-0.0292219236148037	0.0504537252378029
Attention Score	J Virol	PC8	-0.0351093822620431	0.020669865115331	-1.69857819904215	0.0894967557732766	-0.0756215734533926	0.0054028089293064
Attention Score	J Virol	PC9	-0.0365563218042941	0.0212285643740559	-1.72203457380146	0.085160742346873	-0.0781635434209337	0.0050508998123454
Attention Score	J Virol	PC10	-0.0779940626390363	0.0216923521938947	-3.59546359665817	0.000328748141702465	-0.120510291679028	-0.0354778335990443
Attention Score	J Virol	PC11	-0.0244052023954107	0.0221016410456301	-1.10422580590395	0.269578954155918	-0.0677236228440779	0.0189132180532565
Attention Score	J Virol	PC12	-0.0443723028984664	0.022539482761711	-1.96864778875245	0.0490804919419689	-0.0885488773415814	-0.000195728455351471
Attention Score	J Virol	PC13	-0.0607647829653588	0.0230155028699436	-2.6401675126861	0.00832710311882741	-0.105874339676526	-0.0156552262541911
Attention Score	J Virol	PC14	0.0330665526319127	0.0236363462643257	1.39897056262964	0.161919581360996	-0.0132598347722835	0.0793929400361089
Attention Score	J Virol	PC15	-0.0145867526731105	0.0243482155395334	-0.599089187847317	0.549156194142911	-0.0623083782184145	0.0331348728721935
Attention Score	MBio	(Intercept)	2.49610319607947	0.461103919632738	5.41332027293887	7.07812227380633e-08	1.59235612046906	3.39985027168989
Attention Score	MBio	preprintTRUE	0.680104132603721	0.160809316239872	4.22925828245697	2.47070083347035e-05	0.36492366439506	0.995284600812383
Attention Score	MBio	ns(pub_date, df = 3)1	1.08896754558256	0.165785415397603	6.56853646004316	6.75287299168109e-11	0.764034102241243	1.41390098892387
Attention Score	MBio	ns(pub_date, df = 3)2	1.7634922117463	0.349492920148263	5.04585961569174	5.00333137212419e-07	1.07849867540397	2.44848574808863
Attention Score	MBio	ns(pub_date, df = 3)3	0.337088676372353	0.138773333571041	2.42905944318034	0.0152421361797237	0.0650979405585492	0.609079412186157
Attention Score	MBio	log2(authors)	0.148316294320429	0.0497678599439316	2.98016218675109	0.00292225513435699	0.0507730812426897	0.245859507398169
Attention Score	MBio	log2(references + 1)	-0.0502590656012182	0.0768679468245472	-0.653836451699895	0.513306502468071	-0.200917472942871	0.100399341740434
Attention Score	MBio	any_affil_usaTRUE	0.078454515902301	0.0902753701040225	0.869057815126091	0.384939424200633	-0.0984819581926069	0.255390989997209
Attention Score	MBio	any_affil_nature_indexTRUE	0.0402454466317464	0.0888393335045111	0.453013828944393	0.650597178230878	-0.133876447447638	0.214367340711131
Attention Score	MBio	last_author_pub_age	-0.0118057490316481	0.00437281240478613	-2.69980688371778	0.00700744767076153	-0.0203763038561789	-0.00323519420711731
Attention Score	MBio	PC1	-0.15391905372055	0.0250067969883475	-6.15508870617347	9.35995438150899e-10	-0.202931475186416	-0.104906632254685
Attention Score	MBio	PC2	-0.247138213090105	0.0297272919408422	-8.31351249827647	1.89112981992745e-16	-0.305402634652063	-0.188873791528146
Attention Score	MBio	PC3	0.20936828409986	0.0303998244869859	6.88715437121982	8.01150694903156e-12	0.149785722969029	0.268950845230692
Attention Score	MBio	PC4	-0.101361914381877	0.0334623539475287	-3.02913281417139	0.00248989172188559	-0.166946922956965	-0.0357769058067887
Attention Score	MBio	PC5	-0.105449546069995	0.0355630208164	-2.96514591981362	0.00306796637972996	-0.175151786051588	-0.0357473060884031
Attention Score	MBio	PC6	-0.00456197561739287	0.0373694172304747	-0.122077783264776	0.902851990970922	-0.0778046875123738	0.0686807362775881
Attention Score	MBio	PC7	0.0626195003534683	0.0380405872174984	1.64612338909069	0.0999250676963656	-0.0119386805435833	0.13717768125052
Attention Score	MBio	PC8	-0.00368550506709123	0.0386530370982979	-0.0953483954629151	0.924049454676988	-0.0794440656728456	0.0720730555386631
Attention Score	MBio	PC9	0.0593272251608138	0.03980161444583	1.49057333444497	0.136260935401122	-0.018682505679562	0.13733695600119
Attention Score	MBio	PC10	0.0187425149013376	0.0416502830633084	0.449997299486512	0.652770341341975	-0.0628905398486455	0.100375569651321
Attention Score	MBio	PC11	0.16204109916017	0.0428247274941028	3.78382090539826	0.000159847212945376	0.0781061756239859	0.245976022696353
Attention Score	MBio	PC12	-0.00663459997265195	0.0426826473640819	-0.155440217099445	0.876492920894943	-0.0902910515710759	0.077021851625772
Attention Score	MBio	PC13	0.0309205699361634	0.0434629976361333	0.711422856633739	0.476920829019895	-0.0542653400908073	0.116106479963134
Attention Score	MBio	PC14	0.0291940646906765	0.0455545935102533	0.640858856178918	0.521701639266621	-0.060091297919782	0.118479427301135
Attention Score	MBio	PC15	-0.00297703386614363	0.046369765646768	-0.0642020468428038	0.94881697198236	-0.0938601045053715	0.0879060367730842
Attention Score	Mol Biol Cell	(Intercept)	2.1177318573711	0.299182482583579	7.07839522917087	2.51752077683307e-12	1.53134496670201	2.7041187480402
Attention Score	Mol Biol Cell	preprintTRUE	0.632298734200146	0.145640975830649	4.34148927246533	1.5384653463157e-05	0.346847666898805	0.917749801501487
Attention Score	Mol Biol Cell	ns(pub_date, df = 3)1	0.0652432787348991	0.153415584220561	0.425271520272027	0.670717495028145	-0.235445741004571	0.36593229847437
Attention Score	Mol Biol Cell	ns(pub_date, df = 3)2	1.39415875414843	0.297007353929003	4.69402099209198	2.99749793815284e-06	0.812035037304046	1.97628247099282
Attention Score	Mol Biol Cell	ns(pub_date, df = 3)3	-0.0748808841278514	0.139708583522838	-0.535979123398747	0.592075556315798	-0.34870467616372	0.198942907908017
Attention Score	Mol Biol Cell	log2(authors)	-0.0952858404068466	0.0446938154084016	-2.13196925651003	0.0332186374536395	-0.182884108938995	-0.00768757187469821
Attention Score	Mol Biol Cell	log2(references + 1)	-0.204767107588368	0.0482284179338588	-4.24577699955219	2.35214163679993e-05	-0.299293069770077	-0.110241145406659
Attention Score	Mol Biol Cell	any_affil_usaTRUE	0.138551555059172	0.0753190745509235	1.83952811270267	0.0660925220419829	-0.0090711184095256	0.286174228527869
Attention Score	Mol Biol Cell	any_affil_nature_indexTRUE	0.14203823013763	0.0778613182676311	1.82424640756024	0.0683715376067141	-0.0105671494557373	0.294643609730998
Attention Score	Mol Biol Cell	last_author_pub_age	-0.00643671296191146	0.00408970795120268	-1.57388083420934	0.115787215484871	-0.0144523932535558	0.00157896732973288
Attention Score	Mol Biol Cell	PC1	-0.023737775493783	0.0202752681556096	-1.17077492201825	0.241929298243623	-0.0634765708556697	0.0160010198681037
Attention Score	Mol Biol Cell	PC2	0.105291398127128	0.0221383338053343	4.75606696750403	2.22159394808953e-06	0.0619010611909475	0.148681735063309
Attention Score	Mol Biol Cell	PC3	0.0320461764914926	0.0242138179067841	1.32346648574218	0.185940623328101	-0.0154120345340152	0.0795043875170005
Attention Score	Mol Biol Cell	PC4	-0.0175650041272006	0.0259533737695653	-0.676790781929035	0.498673407425635	-0.068432681992855	0.0333026737384539
Attention Score	Mol Biol Cell	PC5	0.0055667213637331	0.0272281999929606	0.204446910378662	0.838040077584767	-0.0477995699863233	0.0589330127137895
Attention Score	Mol Biol Cell	PC6	0.121210030040265	0.028801601258609	4.20844761205889	2.76943063328464e-05	0.0647599288763083	0.177660131204222
Attention Score	Mol Biol Cell	PC7	-0.0131674794176117	0.0296491335146326	-0.444110092158789	0.657045681549845	-0.071278713279111	0.0449437544438876
Attention Score	Mol Biol Cell	PC8	-0.0511661200631339	0.0300487665766126	-1.70276939430044	0.0888786657338713	-0.110060620333146	0.00772838020687775
Attention Score	Mol Biol Cell	PC9	0.0788659472612897	0.0323535108281666	2.43763181313324	0.0149329693824261	0.0154542312646565	0.142277663257923
Attention Score	Mol Biol Cell	PC10	0.0162779433084813	0.0324757957699638	0.501233085211617	0.616302030072671	-0.047373446769926	0.0799293333868887
Attention Score	Mol Biol Cell	PC11	0.0103818611993614	0.0333659963891986	0.311150941763041	0.75574168497268	-0.0550142900317615	0.0757780124304842
Attention Score	Mol Biol Cell	PC12	-0.0438964890270675	0.0333023249149891	-1.31812085610005	0.187722968088259	-0.109167846461897	0.0213748684077621
Attention Score	Mol Biol Cell	PC13	0.00106948084150426	0.0340827674238085	0.0313789320041299	0.974972731338442	-0.0657315158026154	0.0678704774856239
Attention Score	Mol Biol Cell	PC14	0.0653637418105577	0.0345364871520451	1.89259960119271	0.0586594881298906	-0.00232652915998094	0.133054012781096
Attention Score	Mol Biol Cell	PC15	-0.0265303880076976	0.0347942808009211	-0.762492783210373	0.445920697107879	-0.0947259252454763	0.0416651492300812
Attention Score	Mol Biol Evol	(Intercept)	2.32058942472533	0.371561009405658	6.24551383482702	6.67107593615161e-10	1.59234322823089	3.04883562121977
Attention Score	Mol Biol Evol	preprintTRUE	0.183052470196086	0.142611749939383	1.28357214797443	0.199641919514166	-0.0964614234573368	0.462566363849509
Attention Score	Mol Biol Evol	ns(pub_date, df = 3)1	-0.277244939189455	0.227920518723131	-1.21641061867818	0.224166608268333	-0.723960947224478	0.169471068845568
Attention Score	Mol Biol Evol	ns(pub_date, df = 3)2	2.18635662747345	0.429598705181975	5.08929985379571	4.42668082543802e-07	1.34435863751174	3.02835461743516
Attention Score	Mol Biol Evol	ns(pub_date, df = 3)3	0.474303308339087	0.228690006120567	2.07400103041246	0.0383801435718022	0.026079132718531	0.922527483959643
Attention Score	Mol Biol Evol	log2(authors)	0.152499284908616	0.0544303365023898	2.80173327427289	0.00519853364910815	0.0458177856975359	0.259180784119696
Attention Score	Mol Biol Evol	log2(references + 1)	0.0467107885046987	0.0503781165382175	0.927203947159542	0.354084158337579	-0.0520285055191692	0.145450082528567
Attention Score	Mol Biol Evol	any_affil_usaTRUE	0.0510838747751919	0.112798787357571	0.452876098864933	0.650753669984471	-0.169997685945439	0.272165435495823
Attention Score	Mol Biol Evol	any_affil_nature_indexTRUE	0.166541899567552	0.107151484051785	1.55426591653237	0.120493671112108	-0.043471150063965	0.37655494919907
Attention Score	Mol Biol Evol	last_author_pub_age	-0.00470764893626391	0.00678807381371207	-0.693517640711914	0.48817444642059	-0.018012029135539	0.00859673126301119
Attention Score	Mol Biol Evol	PC1	-0.0815745777802686	0.0306883060178513	-2.6581648961926	0.00800453265192111	-0.141722552321801	-0.0214266032387362
Attention Score	Mol Biol Evol	PC2	-0.0618486414885293	0.0342233268908945	-1.80720716269653	0.0710838601077706	-0.128925129625824	0.00522784664876505
Attention Score	Mol Biol Evol	PC3	0.0476310297525524	0.0402884645636294	1.18224981439356	0.237437594968124	-0.0313329097845794	0.126594969289684
Attention Score	Mol Biol Evol	PC4	-0.180258719693293	0.0400573537735101	-4.50001567034361	7.74156901036785e-06	-0.258769690405353	-0.101747748981234
Attention Score	Mol Biol Evol	PC5	0.0324886439732166	0.0408820676300488	0.794691801481614	0.427014890183833	-0.0476387361952097	0.112616024141643
Attention Score	Mol Biol Evol	PC6	-0.0461403802533758	0.0434976672114489	-1.06075528209548	0.289102791466666	-0.131394241399324	0.0391134808925727
Attention Score	Mol Biol Evol	PC7	0.0299984259703928	0.044184720550045	0.678932119451013	0.497365904412661	-0.0566020349746623	0.116598886915448
Attention Score	Mol Biol Evol	PC8	-0.021525770745857	0.045364785824945	-0.47450396501201	0.63526259198815	-0.110439117129122	0.0673875756374083
Attention Score	Mol Biol Evol	PC9	-0.0078159583713648	0.0457939073276957	-0.170676817669974	0.864518557683553	-0.0975703674450132	0.0819384507022836
Attention Score	Mol Biol Evol	PC10	0.0872659575790674	0.0477619264249965	1.82710296905856	0.0680352181250315	-0.00634569804617756	0.180877613204312
Attention Score	Mol Biol Evol	PC11	-0.0396899316397348	0.0478151330547491	-0.83007050496522	0.406732263762915	-0.133405870343034	0.0540260070635642
Attention Score	Mol Biol Evol	PC12	0.0419427794154564	0.0493653571361839	0.84963994689128	0.395764816281207	-0.0548115426554214	0.138697101486334
Attention Score	Mol Biol Evol	PC13	-0.00249305989961593	0.0494549005177502	-0.0504107757475141	0.959806906697735	-0.0994228837734176	0.0944367639741858
Attention Score	Mol Biol Evol	PC14	-0.0015514205812406	0.0522781985896476	-0.029676244076777	0.97633223247935	-0.104014806993583	0.100911965831101
Attention Score	Mol Biol Evol	PC15	-0.0118520300762641	0.0515447699838183	-0.229936617817576	0.818196408712136	-0.112877922835949	0.089173862683421
Attention Score	Mol Cell	(Intercept)	0.180232992896543	0.839820700850772	0.214608895343923	0.830110174480038	-1.46578533424216	1.82625132003524
Attention Score	Mol Cell	preprintTRUE	0.486931934941485	0.25232090872061	1.92981206912446	0.0538750004888643	-0.00760795869732878	0.9814718285803
Attention Score	Mol Cell	ns(pub_date, df = 3)1	0.552460928070171	0.241141828860209	2.29102072701968	0.0221418002025001	0.0798316283380403	1.0250902278023
Attention Score	Mol Cell	ns(pub_date, df = 3)2	1.92213664157686	0.482777967911367	3.98140919705297	7.278937717277e-05	0.975909211941149	2.86836407121258
Attention Score	Mol Cell	ns(pub_date, df = 3)3	1.12464754516606	0.194105552057536	5.79399987916211	8.85752885766901e-09	0.744207653934022	1.50508743639809
Attention Score	Mol Cell	log2(authors)	0.291465746647577	0.0692789384116237	4.20713355790501	2.78675118366564e-05	0.155681522473626	0.427249970821527
Attention Score	Mol Cell	log2(references + 1)	0.318652705890727	0.14186418378034	2.24618150543285	0.0248809324335724	0.0406040149850884	0.596701396796365
Attention Score	Mol Cell	any_affil_usaTRUE	-0.095409996412904	0.113310663687856	-0.842021335924179	0.399950472319773	-0.317494816305432	0.126674823479624
Attention Score	Mol Cell	any_affil_nature_indexTRUE	-0.0255898316040953	0.143232117404312	-0.178659870899353	0.858236139908182	-0.30631962314596	0.255139959937769
Attention Score	Mol Cell	last_author_pub_age	-0.00514442635372375	0.00624261415225801	-0.824082063739749	0.410063215623602	-0.0173797252615295	0.00709087255408199
Attention Score	Mol Cell	PC1	-0.00376457751738842	0.0269831946091803	-0.13951563452415	0.889067046362508	-0.0566506671392172	0.0491215121044403
Attention Score	Mol Cell	PC2	-0.0264197765320024	0.0294388349874128	-0.897446401778426	0.369667950155042	-0.0841188328541491	0.0312792797901443
Attention Score	Mol Cell	PC3	0.139285842327182	0.0323977749254953	4.29924100181248	1.85848673123307e-05	0.0757873702939762	0.202784314360387
Attention Score	Mol Cell	PC4	-0.0752469605444419	0.0336171074959841	-2.23835321207903	0.0253881334016773	-0.141135280500982	-0.00935864058790167
Attention Score	Mol Cell	PC5	-0.0281059947738327	0.0346015732018352	-0.812275054948717	0.416801345525975	-0.0959238320578559	0.0397118425101905
Attention Score	Mol Cell	PC6	-0.0643890221982499	0.0383793372316207	-1.6777002116962	0.0936764224970882	-0.139611140922744	0.0108330965262438
Attention Score	Mol Cell	PC7	0.046266169669974	0.0383114231919857	1.20763380253784	0.227435593472826	-0.0288228399827906	0.121355179322739
Attention Score	Mol Cell	PC8	-0.064516915057774	0.0407025251811017	-1.58508384358741	0.113221258281222	-0.144292398492568	0.01525856837702
Attention Score	Mol Cell	PC9	-0.0518417432406266	0.0422849514369755	-1.22600928885765	0.220445301065835	-0.134718725145124	0.0310352386638706
Attention Score	Mol Cell	PC10	-0.0649784270319596	0.0423390976827403	-1.5347144976698	0.125128076635885	-0.147961533628054	0.0180046795641347
Attention Score	Mol Cell	PC11	0.00427148077493805	0.0440990497177605	0.0968610616844595	0.922853550405707	-0.0821610684243137	0.0907040299741898
Attention Score	Mol Cell	PC12	0.0403002572640291	0.0447725913659952	0.900110001107444	0.368249506027334	-0.0474524093078505	0.128052923835909
Attention Score	Mol Cell	PC13	-0.0231053277037967	0.0462593633236494	-0.499473534517593	0.617541036834888	-0.113772013765903	0.0675613583583092
Attention Score	Mol Cell	PC14	0.0502517897282808	0.0469966729786705	1.06926270613002	0.285174913920827	-0.0418599967031201	0.142363576159682
Attention Score	Mol Cell	PC15	0.0839542609848346	0.0481662439992545	1.74301033284086	0.0815981538692536	-0.0104498425242726	0.178358364493942
Attention Score	Mol Ecol	(Intercept)	2.31193471955248	0.58274079587762	3.96734660745806	7.63618031443454e-05	1.16978374731014	3.45408569179482
Attention Score	Mol Ecol	preprintTRUE	0.377104650761347	0.173492696734979	2.17360533243309	0.0299021553146474	0.0370652135800592	0.717144087942635
Attention Score	Mol Ecol	ns(pub_date, df = 3)1	0.718636059685422	0.184541458781727	3.89417133921877	0.000103184577063627	0.356941446818755	1.08033067255209
Attention Score	Mol Ecol	ns(pub_date, df = 3)2	0.786725496629134	0.361242681793141	2.17783096040583	0.0295853178105996	0.0787028506359145	1.49474814262235
Attention Score	Mol Ecol	ns(pub_date, df = 3)3	0.377804846965107	0.16946210330303	2.22943560596271	0.025943288815003	0.0456652277467619	0.709944466183451
Attention Score	Mol Ecol	log2(authors)	0.166637478482507	0.0501460384369667	3.32304372741167	0.000913429714309951	0.0683530491786909	0.264921907786323
Attention Score	Mol Ecol	log2(references + 1)	-0.079955848922909	0.0916236174648491	-0.87265544774614	0.383000763337033	-0.259534839287288	0.0996231414414703
Attention Score	Mol Ecol	any_affil_usaTRUE	0.471188689134191	0.0808898030431472	5.82506906195402	7.07446136326309e-09	0.312647588453084	0.629729789815298
Attention Score	Mol Ecol	any_affil_nature_indexTRUE	-0.0429065505211172	0.0814741384240647	-0.526627852114164	0.598535589530439	-0.202592927503715	0.11677982646148
Attention Score	Mol Ecol	last_author_pub_age	-0.00576448751845667	0.00569569560758241	-1.01207787698182	0.311675948798775	-0.0169278457762212	0.00539887073930785
Attention Score	Mol Ecol	PC1	0.0364622286729807	0.0248074430843802	1.46981003035895	0.141838215392343	-0.0121594663209317	0.0850839236668931
Attention Score	Mol Ecol	PC2	-0.0155074688964598	0.0267277950079786	-0.580200083539647	0.561873197373743	-0.0678929844982674	0.0368780467053478
Attention Score	Mol Ecol	PC3	0.111530538963965	0.0315335893161987	3.53688055760503	0.000418117820028804	0.0497258396009384	0.173335238326991
Attention Score	Mol Ecol	PC4	0.0541787878120447	0.0340746198356291	1.59000417534796	0.112059962086488	-0.0126062398526825	0.120963815476772
Attention Score	Mol Ecol	PC5	-0.0604075462624012	0.0337154880024363	-1.79168536009433	0.0733995946031065	-0.126488688468368	0.00567359594356617
Attention Score	Mol Ecol	PC6	0.0547315785436729	0.0345296883224988	1.58505857430549	0.113179186392301	-0.012945366965818	0.122408524053164
Attention Score	Mol Ecol	PC7	0.0287395323882223	0.0361730659272076	0.794500871064011	0.427038751046379	-0.0421583740394975	0.0996374388159421
Attention Score	Mol Ecol	PC8	0.107991874803604	0.0371617510529468	2.90599532432529	0.00371852187781334	0.0351561811373847	0.180827568469823
Attention Score	Mol Ecol	PC9	0.0825808401677201	0.0375102508400656	2.2015539304129	0.0278597165345257	0.0090620994701283	0.156099580865312
Attention Score	Mol Ecol	PC10	0.125275677405055	0.0381261980936679	3.28581614923365	0.0010420793243402	0.0505497022740264	0.200001652536084
Attention Score	Mol Ecol	PC11	-0.0787544692906187	0.0395559216458184	-1.99096534763573	0.0466790739081805	-0.156282651091711	-0.00122628748952627
Attention Score	Mol Ecol	PC12	0.0182220960324329	0.0395280750145824	0.460991232831614	0.644876601679261	-0.0592515073743462	0.0956956994392119
Attention Score	Mol Ecol	PC13	-0.063198574754417	0.0413848056643948	-1.5270960861075	0.126963322781165	-0.14431130336382	0.0179141538549861
Attention Score	Mol Ecol	PC14	0.0734427802681961	0.0413176615876453	1.77751541220224	0.0757008285890656	-0.00753834836900277	0.154423908905395
Attention Score	Mol Ecol	PC15	0.0628336217906181	0.0419896689744492	1.49640669539101	0.134773420130961	-0.0194646171220613	0.145131860703298
Attention Score	Nat Genet	(Intercept)	3.53326593268282	0.632883713710787	5.58280432271866	3.35444289485947e-08	2.29283664740772	4.77369521795792
Attention Score	Nat Genet	preprintTRUE	0.226430153458424	0.154511242179903	1.46546070217197	0.143231809937728	-0.0764063164207312	0.529266623337579
Attention Score	Nat Genet	ns(pub_date, df = 3)1	0.778200065794829	0.222381564504204	3.49939109174725	0.000495015542815843	0.342340208540917	1.21405992304874
Attention Score	Nat Genet	ns(pub_date, df = 3)2	0.971882978212187	0.45665847808567	2.1282490632526	0.0336554318006519	0.0768488079294	1.86691714849497
Attention Score	Nat Genet	ns(pub_date, df = 3)3	0.705607255179348	0.186838721976568	3.7765579196578	0.00017213354984339	0.339410089187784	1.07180442117091
Attention Score	Nat Genet	log2(authors)	0.158015161760303	0.0406417117320673	3.88800459001399	0.000110414980007123	0.0783588704953925	0.237671453025214
Attention Score	Nat Genet	log2(references + 1)	0.209578177633712	0.108442234913137	1.9326250312121	0.053674293136256	-0.00296469719906908	0.422121052466493
Attention Score	Nat Genet	any_affil_usaTRUE	0.460109007584476	0.125989619195582	3.65195966558337	0.000279108961385102	0.213173891535218	0.707044123633733
Attention Score	Nat Genet	any_affil_nature_indexTRUE	-0.00438356598739908	0.184499929635651	-0.0237591743045958	0.981051288064321	-0.365996783223448	0.35722965124865
Attention Score	Nat Genet	last_author_pub_age	-0.00169110307671289	0.00682369463328195	-0.247828070802683	0.804338094170213	-0.0150652987994448	0.011683092646019
Attention Score	Nat Genet	PC1	0.111184683754013	0.0263724968612615	4.21593314955824	2.804275189678e-05	0.059495539723545	0.162873827784481
Attention Score	Nat Genet	PC2	-0.06817224724714	0.0332785937211468	-2.04853149199692	0.0408700287669743	-0.133397092396728	-0.00294740209755154
Attention Score	Nat Genet	PC3	-0.0425512334504699	0.0332733679840378	-1.27883758178261	0.201366283464845	-0.107765836343532	0.0226633694425923
Attention Score	Nat Genet	PC4	0.0447276410769732	0.0367294927880795	1.21775820142797	0.223714802352781	-0.0272608419580862	0.116716124112033
Attention Score	Nat Genet	PC5	0.00371865500674826	0.0389021792210568	0.0955898893380104	0.92387289360884	-0.0725282151866455	0.079965525200142
Attention Score	Nat Genet	PC6	0.0242835374115729	0.0400607240418583	0.606168210694337	0.544594114163676	-0.0542340389050673	0.102801113728213
Attention Score	Nat Genet	PC7	0.0900815620026782	0.0405627505943378	2.22079520453558	0.026675277181242	0.0105800317238955	0.169583092281461
Attention Score	Nat Genet	PC8	0.0586033126286833	0.0430019717011072	1.36280524614118	0.173369968522791	-0.0256790031696974	0.142885628427064
Attention Score	Nat Genet	PC9	-0.0247027057436001	0.0431146007005138	-0.572954529144131	0.566854366189745	-0.109205770324432	0.0598003588372322
Attention Score	Nat Genet	PC10	-0.0260064172776284	0.0441845557553926	-0.588586143574713	0.556323523657967	-0.1126065552311	0.0605937206758431
Attention Score	Nat Genet	PC11	-0.0511320199293315	0.0459410054956587	-1.11299305223442	0.266082858482825	-0.141174736114379	0.0389106962557162
Attention Score	Nat Genet	PC12	0.0364426401020294	0.0465620746168959	0.782667877277219	0.434079506629972	-0.0548173491925532	0.127702629396612
Attention Score	Nat Genet	PC13	0.102437032471787	0.0466661507950959	2.19510353278489	0.0284746798291548	0.0109730576162841	0.19390100732729
Attention Score	Nat Genet	PC14	-0.115950883286777	0.0485578073721006	-2.3878937201229	0.0172021014989173	-0.211122436904327	-0.0207793296692258
Attention Score	Nat Genet	PC15	0.12274364005244	0.0489137130933075	2.50939117662761	0.0123124090893489	0.0268745240394322	0.218612756065448
Attention Score	Nat Methods	(Intercept)	3.85790217621111	0.664827942900032	5.80285804381602	1.13297896931655e-08	2.5548633522112	5.16094100021103
Attention Score	Nat Methods	preprintTRUE	0.68777700266512	0.180212638607839	3.81647484870244	0.000151630874699827	0.334566721434824	1.04098728389542
Attention Score	Nat Methods	ns(pub_date, df = 3)1	0.72867014384561	0.275434223912027	2.64553232890313	0.00840262448434736	0.188828984868296	1.26851130282292
Attention Score	Nat Methods	ns(pub_date, df = 3)2	-0.980687639825982	0.548259473387763	-1.78872903693974	0.0742393324944324	-2.05525646184889	0.0938811821969295
Attention Score	Nat Methods	ns(pub_date, df = 3)3	0.0894122824299143	0.206395858679627	0.433207734893085	0.665043151763391	-0.315116167140372	0.493940732000201
Attention Score	Nat Methods	log2(authors)	0.110740617077767	0.0724179260478812	1.52918791135426	0.126824757614539	-0.0311959098111653	0.252677143966699
Attention Score	Nat Methods	log2(references + 1)	0.260573950844006	0.120254975047671	2.16684549425678	0.0306991311985006	0.0248785307888089	0.496269370899203
Attention Score	Nat Methods	any_affil_usaTRUE	0.325944356420659	0.139912982766567	2.32962195484368	0.0202073500168005	0.0517199492286151	0.600168763612703
Attention Score	Nat Methods	any_affil_nature_indexTRUE	-0.106252225562086	0.173497719602138	-0.612412807532811	0.540531859923271	-0.446301507382106	0.233797056257934
Attention Score	Nat Methods	last_author_pub_age	-0.0147136432726795	0.00950910628619156	-1.54732136016248	0.122392961529629	-0.0333511491187784	0.00392386257341941
Attention Score	Nat Methods	PC1	-0.0294981535442457	0.0370431508449823	-0.796318695126373	0.426209516586755	-0.102101395074296	0.0431050879858041
Attention Score	Nat Methods	PC2	-0.113552015303115	0.0423020120100358	-2.68431712600753	0.00749920289403093	-0.196462435316366	-0.0306415952898641
Attention Score	Nat Methods	PC3	-0.0138471320891758	0.0446450436727224	-0.310160567669827	0.756562882373203	-0.101349809775929	0.0736555455975779
Attention Score	Nat Methods	PC4	0.11979861623077	0.0473432625055985	2.53042587034646	0.0116857825934167	0.0270075268091715	0.212589705652369
Attention Score	Nat Methods	PC5	-4.96683466590422e-05	0.0499516904208559	-0.000994327644181278	0.999207022054035	-0.0979531825384311	0.097853845845113
Attention Score	Nat Methods	PC6	-0.0946516440715431	0.0521705550031772	-1.8142732824249	0.0702107014308097	-0.196904052931236	0.00760076478815015
Attention Score	Nat Methods	PC7	-0.117431452254976	0.0535521187379136	-2.19284418660801	0.0287599861500372	-0.222391676277099	-0.0124712282328525
Attention Score	Nat Methods	PC8	0.0202729707434999	0.0574270594900361	0.35302122246077	0.724215312324986	-0.0922819975950099	0.13282793908201
Attention Score	Nat Methods	PC9	-0.0422994684778814	0.0587742281386187	-0.719694155372288	0.47203603790785	-0.157494838848715	0.0728959018929519
Attention Score	Nat Methods	PC10	-0.169128263451742	0.0598658880970081	-2.82511909249025	0.00490755634403416	-0.286463248024383	-0.0517932788791014
Attention Score	Nat Methods	PC11	0.0414959022447637	0.06074166300136	0.683153871566451	0.494813288904206	-0.0775555695989709	0.160547374088498
Attention Score	Nat Methods	PC12	0.0316045451625776	0.0614708911801041	0.514138392267311	0.607373236088097	-0.0888761876480074	0.152085277973162
Attention Score	Nat Methods	PC13	-0.0937850019432587	0.0624834430262861	-1.50095765215442	0.133972283927719	-0.21625029990484	0.0286802960183224
Attention Score	Nat Methods	PC14	-0.0103778737008523	0.0637991410603025	-0.16266478714883	0.870845443870085	-0.135421892423636	0.114666145021931
Attention Score	Nat Methods	PC15	-0.00838329429952582	0.0655297287577401	-0.127931161298079	0.898252814404203	-0.136819202581375	0.120052613982323
Attention Score	Neuroimage	(Intercept)	0.585836919012659	0.314642241853373	1.86191439382658	0.0627060800239034	-0.0308505430348939	1.20252438106021
Attention Score	Neuroimage	preprintTRUE	0.699019985703547	0.118192206645883	5.91426461643015	3.68246927921612e-09	0.4673675174243	0.930672453982793
Attention Score	Neuroimage	ns(pub_date, df = 3)1	0.694527203287533	0.120683155251788	5.7549639122254	9.47767177923894e-09	0.457992565453373	0.931061841121692
Attention Score	Neuroimage	ns(pub_date, df = 3)2	0.964879186156625	0.244439124854002	3.94731893567745	8.07185741986002e-05	0.485787305030293	1.44397106728296
Attention Score	Neuroimage	ns(pub_date, df = 3)3	0.316060295475174	0.100203985622279	3.15416890368582	0.00162436768662428	0.119664092548137	0.51245649840221
Attention Score	Neuroimage	log2(authors)	0.0499238713216147	0.0372020084307103	1.34196709875487	0.179701163619293	-0.022990725355133	0.122838467998362
Attention Score	Neuroimage	log2(references + 1)	0.155239206039765	0.0496068981384374	3.12938748168734	0.00176736597979208	0.0580114723036809	0.25246693977585
Attention Score	Neuroimage	any_affil_usaTRUE	0.0459067307797516	0.0582171289102501	0.788543365828351	0.430436920312224	-0.0681967451676641	0.160010206727167
Attention Score	Neuroimage	any_affil_nature_indexTRUE	0.204345267967809	0.0607144883385766	3.36567553412079	0.00077250173824028	0.0853470574844219	0.323343478451196
Attention Score	Neuroimage	last_author_pub_age	-0.00256093773990943	0.00400322128705805	-0.639719255138017	0.522400588702501	-0.0104071072846873	0.00528523180486843
Attention Score	Neuroimage	PC1	-0.00452934868740675	0.0161767300159163	-0.279991610353287	0.779501904041009	-0.0362351569062307	0.0271764595314172
Attention Score	Neuroimage	PC2	-0.13019998287563	0.0167384396881536	-7.7785017780228	9.80393186544965e-15	-0.163006721821807	-0.0973932439294534
Attention Score	Neuroimage	PC3	-0.0178376433503703	0.0194321541027116	-0.917944724814694	0.358716469669968	-0.0559239655337172	0.0202486788329766
Attention Score	Neuroimage	PC4	0.133681198690587	0.0200186506311042	6.6778326448676	2.8446358720577e-11	0.094445364434533	0.172917032946642
Attention Score	Neuroimage	PC5	0.0887107684076546	0.02084764946416	4.25519282450334	2.14815992879181e-05	0.0478501262955852	0.129571410519724
Attention Score	Neuroimage	PC6	-0.0645369551977278	0.0220100309387481	-2.93216103954276	0.00338981779251728	-0.107675823136286	-0.0213980872591693
Attention Score	Neuroimage	PC7	0.0749638828477321	0.0236366503892921	3.17151041340834	0.00153072193008297	0.028636899369555	0.121290866325909
Attention Score	Neuroimage	PC8	-0.0019442954577629	0.0237234008947605	-0.0819568605019154	0.934686105804862	-0.0484413068022987	0.0445527158867729
Attention Score	Neuroimage	PC9	0.0235272099885337	0.0245484184609547	0.958400233642535	0.337932841504861	-0.0245868060723557	0.0716412260494232
Attention Score	Neuroimage	PC10	0.0538854294290535	0.0251554122799347	2.14210082623195	0.0322600733971418	0.0045817273441249	0.103189131513982
Attention Score	Neuroimage	PC11	0.0124197391946791	0.0254994696924206	0.487058724925982	0.626249827116885	-0.0375583030273359	0.0623977814166941
Attention Score	Neuroimage	PC12	0.0799177111805313	0.0260352983301906	3.06959075970558	0.00216136598955048	0.0288894641266018	0.130945958234461
Attention Score	Neuroimage	PC13	0.111253386289435	0.0263300993231162	4.22533105265429	2.45201283525051e-05	0.0596473399067643	0.162859432672105
Attention Score	Neuroimage	PC14	-0.0140542637074132	0.0273348740220011	-0.51415139854317	0.607181383105842	-0.0676296323124748	0.0395211048976484
Attention Score	Neuroimage	PC15	-0.110312185994926	0.0276059944141922	-3.99595045698534	6.58767274541059e-05	-0.164418940804157	-0.0562054311856955
Attention Score	Neuron	(Intercept)	2.1083968409837	0.70947922688996	2.97175274634321	0.00301763689341508	0.717843108500053	3.49895057346734
Attention Score	Neuron	preprintTRUE	0.565149659317486	0.247409645155312	2.28426688443255	0.0225227459472031	0.08023566538524	1.05006365324973
Attention Score	Neuron	ns(pub_date, df = 3)1	0.390020659136766	0.226387660247287	1.72279999144273	0.08517183174046	-0.053691001492206	0.833732319765738
Attention Score	Neuron	ns(pub_date, df = 3)2	1.21732538682192	0.440761552818113	2.76186835952151	0.00583127052797008	0.353448617528467	2.08120215611537
Attention Score	Neuron	ns(pub_date, df = 3)3	0.831141001561483	0.192597921736587	4.31542040572079	1.71856843703807e-05	0.453656011460508	1.20862599166246
Attention Score	Neuron	log2(authors)	0.242453664401253	0.0603672211719068	4.01631315297455	6.26351302643896e-05	0.124136085057552	0.360771243744954
Attention Score	Neuron	log2(references + 1)	0.261947082701942	0.115693293793888	2.26415096426082	0.0237354411318203	0.0351923936131106	0.488701771790774
Attention Score	Neuron	any_affil_usaTRUE	0.129435424798506	0.124021715504096	1.04365130148704	0.296848377040706	-0.113642670890396	0.372513520487408
Attention Score	Neuron	any_affil_nature_indexTRUE	-0.00511295647241616	0.150572512974668	-0.0339567718662991	0.97291703881992	-0.300229658964455	0.290003746019623
Attention Score	Neuron	last_author_pub_age	-0.0229557777987091	0.00625715718638985	-3.6687232100611	0.000254010779814618	-0.0352195805296392	-0.010691975067779
Attention Score	Neuron	PC1	-0.272044068416833	0.0255264664388598	-10.6573335979903	1.91494652345383e-25	-0.322075023289569	-0.222013113544098
Attention Score	Neuron	PC2	0.00864825781595029	0.0355187225447378	0.243484483572215	0.807670023561967	-0.0609671591486067	0.0782636747805073
Attention Score	Neuron	PC3	-0.175364816767852	0.0382920045766298	-4.57967188468581	5.1217160900596e-06	-0.250415766633889	-0.100313866901815
Attention Score	Neuron	PC4	-0.0131414428501976	0.0396699574003949	-0.331269396575323	0.740496486966332	-0.0908931306232097	0.0646102449228146
Attention Score	Neuron	PC5	0.194474833261909	0.0415170813706297	4.68421254196076	3.11730935971157e-06	0.113102849032256	0.275846817491562
Attention Score	Neuron	PC6	0.123483081414828	0.0426372461996557	2.89613172568882	0.00384363537078228	0.0399156144635354	0.20705054836612
Attention Score	Neuron	PC7	-0.0611904102652951	0.0445201072881104	-1.37444435767649	0.169549931106664	-0.148448217137851	0.0260673966072604
Attention Score	Neuron	PC8	-0.0675226902123036	0.045398677647832	-1.48732724631525	0.137180396857808	-0.156502463347798	0.0214570829231906
Attention Score	Neuron	PC9	0.194691680757224	0.0464030285292562	4.19566754429561	2.9127263764387e-05	0.103743416066297	0.28563994544815
Attention Score	Neuron	PC10	0.0286202019859469	0.0481599681596872	0.594273689946161	0.552436524239438	-0.0657716011036358	0.12301200507553
Attention Score	Neuron	PC11	-0.0707238399433168	0.0488046584418975	-1.44912068235278	0.147554497568277	-0.166379212767215	0.0249315328805809
Attention Score	Neuron	PC12	-0.0469138600598163	0.0489190292848928	-0.959010445334086	0.337738787172679	-0.142793395616866	0.0489656754972339
Attention Score	Neuron	PC13	0.0319112139369925	0.0491853851356419	0.648794633791904	0.51659020593836	-0.0644903694945973	0.128312797368582
Attention Score	Neuron	PC14	0.0101006998033959	0.0500625305198806	0.201761670824546	0.840135849936692	-0.0880200569905073	0.108221456597299
Attention Score	Neuron	PC15	-0.0182258329936923	0.0506682840668048	-0.359708905272222	0.719125543580948	-0.117533844923074	0.0810821789356897
Attention Score	Nucleic Acids Res	(Intercept)	1.07707410124405	0.225567575959465	4.77495090623131	1.85069342497375e-06	0.634969776283492	1.5191784262046
Attention Score	Nucleic Acids Res	preprintTRUE	0.986130107876071	0.096256687788258	10.2447957698828	2.21520764295521e-24	0.797470466539969	1.17478974921217
Attention Score	Nucleic Acids Res	ns(pub_date, df = 3)1	-0.305243869833743	0.0884942956607637	-3.44930560274611	0.000566839230546912	-0.478689502166079	-0.131798237501407
Attention Score	Nucleic Acids Res	ns(pub_date, df = 3)2	0.883584520532021	0.185517876378457	4.76279988635437	1.96518256310164e-06	0.519976164341891	1.24719287672215
Attention Score	Nucleic Acids Res	ns(pub_date, df = 3)3	0.266252267575209	0.0861243518708216	3.09148645872613	0.00200292777341978	0.0974516397165439	0.435052895433874
Attention Score	Nucleic Acids Res	log2(authors)	0.178032870554101	0.0254166581312974	7.00457430848772	2.81807147635049e-12	0.128217136009391	0.227848605098811
Attention Score	Nucleic Acids Res	log2(references + 1)	0.010748905950409	0.0368570471376569	0.291637740545601	0.770576148288681	-0.0614895790158936	0.0829873909167115
Attention Score	Nucleic Acids Res	any_affil_usaTRUE	0.0416376654340618	0.041906662148499	0.993581051301964	0.320476676253759	-0.0404978830892841	0.123773213957408
Attention Score	Nucleic Acids Res	any_affil_nature_indexTRUE	0.103859888963306	0.0424457477605222	2.44688559969023	0.0144450729322809	0.0206677520558106	0.187052025870801
Attention Score	Nucleic Acids Res	last_author_pub_age	-0.0128814386686139	0.00251849950800517	-5.11472749058303	3.26356899357847e-07	-0.0178176069993858	-0.00794527033784189
Attention Score	Nucleic Acids Res	PC1	-0.121549983635474	0.0126811531126118	-9.58508919150169	1.43590288619808e-21	-0.146404587018631	-0.0966953802523166
Attention Score	Nucleic Acids Res	PC2	0.173034860798535	0.0138946313849911	12.4533610143444	4.61191770472029e-35	0.145801883705492	0.200267837891577
Attention Score	Nucleic Acids Res	PC3	-0.059761350197039	0.0154640601773564	-3.86453166320098	0.000112763371573595	-0.0900703511994175	-0.0294523491946604
Attention Score	Nucleic Acids Res	PC4	0.0163411343377628	0.0157526640289885	1.03735687549048	0.299621530132347	-0.0145335198196143	0.0472157884951399
Attention Score	Nucleic Acids Res	PC5	0.0930791156165898	0.016859544882277	5.52085576843987	3.55011202808061e-08	0.0600350148515903	0.126123216381589
Attention Score	Nucleic Acids Res	PC6	0.0494120876796381	0.0170358910572825	2.90046980891647	0.00374286723016965	0.0160223547628164	0.0828018205964599
Attention Score	Nucleic Acids Res	PC7	-0.0559734425470095	0.0179069724042066	-3.12579040630345	0.00178380994103294	-0.091070463531407	-0.020876421562612
Attention Score	Nucleic Acids Res	PC8	-0.0597981087126174	0.0182406793175441	-3.27828298889629	0.00105180208042052	-0.0955491832285485	-0.0240470341966862
Attention Score	Nucleic Acids Res	PC9	-0.0162483009676885	0.018910889938298	-0.859203401886589	0.390270972799041	-0.0533129641623533	0.0208163622269764
Attention Score	Nucleic Acids Res	PC10	0.0559333938254985	0.0190811832937761	2.93133779830851	0.0033908989160364	0.0185349617872901	0.0933318258637069
Attention Score	Nucleic Acids Res	PC11	0.0392201497851424	0.0193417725054666	2.02774330915419	0.0426412781477264	0.00131097227726084	0.077129327293024
Attention Score	Nucleic Acids Res	PC12	0.0272359826954346	0.019641726327809	1.38663894613344	0.165615920855515	-0.0112610935012632	0.0657330588921324
Attention Score	Nucleic Acids Res	PC13	0.0490534526008087	0.0199258930400242	2.46179443512405	0.0138590995773259	0.00999941988256392	0.0881074853190534
Attention Score	Nucleic Acids Res	PC14	-0.0291210520504999	0.0201891114712521	-1.44241375317414	0.149250566807565	-0.0686909834140184	0.0104488793130187
Attention Score	Nucleic Acids Res	PC15	-0.0233208107847751	0.0206318304547894	-1.13033164148368	0.258392667356528	-0.063758455411299	0.0171168338417487
Attention Score	PLoS Biol	(Intercept)	5.49909450455259	0.514028722720904	10.6980296265241	2.59718493686007e-25	4.49161672100049	6.50657228810469
Attention Score	PLoS Biol	preprintTRUE	0.499478313275517	0.204532330475737	2.44205066315797	0.0147836416727584	0.098602311869029	0.900354314682005
Attention Score	PLoS Biol	ns(pub_date, df = 3)1	0.732662966718718	0.275810773338588	2.6563972025099	0.00802906526900396	0.192083784426945	1.27324214901049
Attention Score	PLoS Biol	ns(pub_date, df = 3)2	0.379100803272372	0.572362002402422	0.66234446326126	0.507909458378927	-0.742708107555603	1.50090971410035
Attention Score	PLoS Biol	ns(pub_date, df = 3)3	-0.789017549007482	0.213948261811982	-3.68788950340187	0.000238809620653541	-1.20834843671391	-0.369686661301053
Attention Score	PLoS Biol	log2(authors)	0.034410196947362	0.0602540882931384	0.571084849545064	0.568075788518219	-0.0836856460284857	0.15250603992321
Attention Score	PLoS Biol	log2(references + 1)	-0.108516829480809	0.0835485028378925	-1.2988482832704	0.194307881360011	-0.272268886005321	0.0552352270437031
Attention Score	PLoS Biol	any_affil_usaTRUE	0.180503302129902	0.128498772452322	1.40470837724831	0.160431484778619	-0.0713496639342575	0.432356268194061
Attention Score	PLoS Biol	any_affil_nature_indexTRUE	0.128354072968502	0.145758551619735	0.880593773347593	0.378758125644812	-0.157327438644901	0.414035584581906
Attention Score	PLoS Biol	last_author_pub_age	-0.0165896745579723	0.00824921411124172	-2.01106121556046	0.0445981450761941	-0.0327578371167656	-0.000421511999178913
Attention Score	PLoS Biol	PC1	0.235332889420927	0.0444061418652813	5.29955721293863	1.44029878695142e-07	0.1482984506726	0.322367328169255
Attention Score	PLoS Biol	PC2	0.0357840536493902	0.0487328820982522	0.734289705608722	0.462951496872324	-0.0597306401260209	0.131298747424801
Attention Score	PLoS Biol	PC3	-0.0687740249442883	0.0572744573385154	-1.20078003599067	0.230132731050804	-0.181029898561854	0.0434818486732776
Attention Score	PLoS Biol	PC4	0.170909342685977	0.0589612279724986	2.89867339204153	0.00383275685582409	0.0553474593756237	0.28647122599633
Attention Score	PLoS Biol	PC5	0.232555309938039	0.0598561337184882	3.88523774408449	0.000109243583813397	0.115239443595989	0.34987117628009
Attention Score	PLoS Biol	PC6	0.0392858218816091	0.063172839971626	0.62187835625649	0.534169513630819	-0.0845306692638903	0.163102313027108
Attention Score	PLoS Biol	PC7	-0.0851156521423592	0.0648579974662766	-1.31233857762284	0.189719599060212	-0.212234991285651	0.0420036870009331
Attention Score	PLoS Biol	PC8	-0.051284344356373	0.0665068232131337	-0.771114028285829	0.440829091970365	-0.181635322580288	0.0790666338675415
Attention Score	PLoS Biol	PC9	0.0556200070102796	0.0696538253363739	0.798520493909388	0.424766000247482	-0.0808989820344568	0.192138996055016
Attention Score	PLoS Biol	PC10	-0.121478745349909	0.0697506040113515	-1.74161567590352	0.0818960203988772	-0.258187417112072	0.0152299264122553
Attention Score	PLoS Biol	PC11	-0.161411175721702	0.0779397853266613	-2.07097280349433	0.0386280962371445	-0.314170347924741	-0.00865200351866224
Attention Score	PLoS Biol	PC12	-0.0656015629724856	0.0812668554706785	-0.807236389208574	0.419730256871218	-0.224881672831837	0.0936785468868661
Attention Score	PLoS Biol	PC13	0.0681331287040982	0.0852916640767269	0.798825177602431	0.424589370266363	-0.0990354610677752	0.235301718475972
Attention Score	PLoS Comput Biol	(Intercept)	1.73178204416593	0.423214114436461	4.09197610640164	4.43332744781168e-05	0.90229762212145	2.5612664662104
Attention Score	PLoS Comput Biol	preprintTRUE	0.51836158436842	0.107199071862375	4.83550440654848	1.42117858015367e-06	0.308255264342044	0.728467904394795
Attention Score	PLoS Comput Biol	ns(pub_date, df = 3)1	0.941617004410574	0.155851262178402	6.04176694656927	1.78868747552089e-09	0.636154143595795	1.24707986522535
Attention Score	PLoS Comput Biol	ns(pub_date, df = 3)2	0.267699642258503	0.327942321014743	0.816300992900726	0.414417522078425	-0.375055495936865	0.910454780453872
Attention Score	PLoS Comput Biol	ns(pub_date, df = 3)3	-0.793750314167914	0.136662322975656	-5.80811372794613	7.24759248863182e-09	-1.06160354524378	-0.525897083092048
Attention Score	PLoS Comput Biol	log2(authors)	0.192802524763345	0.0491889343020585	3.91963207780406	9.14299087089839e-05	0.0963939850934032	0.289211064433286
Attention Score	PLoS Comput Biol	log2(references + 1)	0.0802659289770638	0.0654278370943207	1.22678560902682	0.220036145764144	-0.0479702753141585	0.208502133268286
Attention Score	PLoS Comput Biol	any_affil_usaTRUE	0.103537168625579	0.0752879824343545	1.3752150778626	0.169206599063201	-0.0440245654144398	0.251098902665598
Attention Score	PLoS Comput Biol	any_affil_nature_indexTRUE	0.233314879048327	0.0789547703507684	2.95504474285456	0.00315987413930294	0.0785663727531903	0.388063385343464
Attention Score	PLoS Comput Biol	last_author_pub_age	-0.0206155564966027	0.00538298743764031	-3.82976121260275	0.000131902216382088	-0.0311660180036093	-0.0100650949895961
Attention Score	PLoS Comput Biol	PC1	0.0839732417354636	0.0211345513665691	3.97326824113682	7.32052419679029e-05	0.0425502822275765	0.125396201243351
Attention Score	PLoS Comput Biol	PC2	0.129759503662276	0.0248107914693381	5.22996228567061	1.85802187468072e-07	0.0811312459544402	0.178387761370113
Attention Score	PLoS Comput Biol	PC3	-0.283775809989468	0.0279632662199858	-10.148163943261	1.12842348721864e-23	-0.338582804670746	-0.228968815308191
Attention Score	PLoS Comput Biol	PC4	0.108070382267608	0.030606316030422	3.53098302194188	0.000422642837787428	0.0480831051485298	0.168057659386686
Attention Score	PLoS Comput Biol	PC5	0.0774049209909396	0.0323920854757495	2.38962449790055	0.0169504240984974	0.0139176000743275	0.140892241907552
Attention Score	PLoS Comput Biol	PC6	0.0734369308734982	0.0342174606886614	2.14618295441873	0.031968874666735	0.00637194028130678	0.14050192146569
Attention Score	PLoS Comput Biol	PC7	-0.0596976597821295	0.0349244569729687	-1.7093368073936	0.0875314235718427	-0.128148337628767	0.00875301806450791
Attention Score	PLoS Comput Biol	PC8	0.0412254768548863	0.0362480234366935	1.13731654711838	0.255531428854613	-0.0298193435917967	0.112270297301569
Attention Score	PLoS Comput Biol	PC9	-0.0416000564147828	0.038389241625241	-1.08363840111472	0.278645432610959	-0.116841587394061	0.0336414745644955
Attention Score	PLoS Comput Biol	PC10	-0.0296117984528451	0.0384470486469475	-0.770196920048794	0.441266851267139	-0.104966629112722	0.0457430322070315
Attention Score	PLoS Comput Biol	PC11	-0.0488036534548119	0.0398162009567609	-1.22572350656486	0.220435625575078	-0.126841973331272	0.0292346664216487
Attention Score	PLoS Comput Biol	PC12	-0.0382473800021311	0.0401633015181495	-0.952296712580946	0.34105248434556	-0.116966004477927	0.0404712444736647
Attention Score	PLoS Comput Biol	PC13	-0.00960172681095078	0.0414249494481745	-0.231786083962836	0.816726000603253	-0.0907931357907651	0.0715896821688636
Attention Score	PLoS Comput Biol	PC14	0.140472840339026	0.0428911244238772	3.27510276836728	0.00107284025521343	0.0564077812118002	0.224537899466251
Attention Score	PLoS Comput Biol	PC15	0.000265147394671501	0.0437575059646869	0.00605947228540585	0.995165826668381	-0.0854979883494114	0.0860282831387544
Attention Score	PLoS Genet	(Intercept)	-0.541488524315125	0.451209938975491	-1.20008110979253	0.230225991989896	-1.4258437541736	0.342866705543353
Attention Score	PLoS Genet	preprintTRUE	0.665732933319844	0.112662350879195	5.90909854201154	3.92757043175697e-09	0.444918783183007	0.88654708345668
Attention Score	PLoS Genet	ns(pub_date, df = 3)1	0.696498231466299	0.149090587980753	4.67164454107737	3.15260595563989e-06	0.404286048590123	0.988710414342475
Attention Score	PLoS Genet	ns(pub_date, df = 3)2	1.7366707168144	0.274143796796675	6.3348897079092	2.82562948196158e-10	1.19935874850786	2.27398268512095
Attention Score	PLoS Genet	ns(pub_date, df = 3)3	-0.196232530910492	0.123912927603144	-1.58363243211367	0.11340881373107	-0.439097406231572	0.0466323444105891
Attention Score	PLoS Genet	log2(authors)	0.107320037093898	0.0391775650492905	2.73932381859044	0.00620197807624391	0.0305334205953131	0.184106653592482
Attention Score	PLoS Genet	log2(references + 1)	0.353437651369043	0.0713378703496836	4.95441831437585	7.75881627809998e-07	0.213617994749875	0.49325730798821
Attention Score	PLoS Genet	any_affil_usaTRUE	0.0704292832764362	0.0720783764799094	0.977120833126245	0.328607568221688	-0.0708417386883052	0.211700305241178
Attention Score	PLoS Genet	any_affil_nature_indexTRUE	0.204960789831428	0.0790088257709439	2.59415056269327	0.00954003439160164	0.0501063368595782	0.359815242803278
Attention Score	PLoS Genet	last_author_pub_age	-0.00597232727575713	0.00434699688681393	-1.37389729766622	0.169601549331168	-0.0144922846148202	0.0025476300633059
Attention Score	PLoS Genet	PC1	-0.051671873007375	0.0195256963921147	-2.64635237431236	0.00818951407765459	-0.0899415347089834	-0.0134022113057666
Attention Score	PLoS Genet	PC2	0.198636198000933	0.0206029862594217	9.64113626538467	1.31043345922719e-21	0.158255086958492	0.239017309043373
Attention Score	PLoS Genet	PC3	-0.155659230235571	0.022624292421449	-6.880181149356	7.59510144120484e-12	-0.200002028557314	-0.111316431913829
Attention Score	PLoS Genet	PC4	0.0175416265730379	0.023513791268653	0.746014386732405	0.455731603742883	-0.0285445574535143	0.0636278105995901
Attention Score	PLoS Genet	PC5	-0.0776239041327153	0.026224521917497	-2.95997404173552	0.00310670801922473	-0.129023022602791	-0.02622478566264
Attention Score	PLoS Genet	PC6	0.150595165413459	0.0275597962611425	5.46430619393903	5.12550638917939e-08	0.0965789573203577	0.20461137350656
Attention Score	PLoS Genet	PC7	-0.155229767600576	0.0299685678153305	-5.17975261804697	2.40615280676133e-07	-0.21396708118687	-0.0964924540142824
Attention Score	PLoS Genet	PC8	-0.0116056975600209	0.0302929445373738	-0.383115531925344	0.701667948909901	-0.070978777838943	0.0477673827189012
Attention Score	PLoS Genet	PC9	0.140992390072822	0.0320775380114173	4.39536195148887	1.1538973173111e-05	0.0781215708577291	0.203863209287914
Attention Score	PLoS Genet	PC10	0.110598593346266	0.0326043364950271	3.39214366049543	0.000704693543231038	0.046695268076188	0.174501918616344
Attention Score	PLoS Genet	PC11	-0.133713221050642	0.0339739918975183	-3.93575242656161	8.52886175976033e-05	-0.200301021580834	-0.0671254205204507
Attention Score	PLoS Genet	PC12	-0.012973418336693	0.0344732698412222	-0.376332688962965	0.706702762114255	-0.0805397856548193	0.0545929489814332
Attention Score	PLoS Genet	PC13	-0.00403484686190881	0.0349915967564334	-0.115309023763455	0.908209808339632	-0.0726171162660668	0.0645474225422492
Attention Score	PLoS Genet	PC14	0.0224446794437061	0.0356738740343409	0.629162939301185	0.529302119457873	-0.0474748288526205	0.0923641877400328
Attention Score	PLoS Genet	PC15	0.038638254160683	0.0361358685555501	1.0692493554233	0.285064583778277	-0.0321867467582686	0.109463255079635
Attention Score	PLoS Negl Trop Dis	(Intercept)	1.00447825916349	0.32698426692523	3.07194675942367	0.00214686474576896	0.363600872478804	1.64535564584817
Attention Score	PLoS Negl Trop Dis	preprintTRUE	0.873100031459654	0.225278267676022	3.87565139090682	0.000108749113469474	0.431562740315077	1.31463732260423
Attention Score	PLoS Negl Trop Dis	ns(pub_date, df = 3)1	1.15210662264461	0.129622386406654	8.88817629873128	1.08080113443594e-18	0.898051413697436	1.40616183159179
Attention Score	PLoS Negl Trop Dis	ns(pub_date, df = 3)2	1.07910723154628	0.260817361162349	4.1374056801172	3.6147361606694e-05	0.567914597125302	1.59029986596726
Attention Score	PLoS Negl Trop Dis	ns(pub_date, df = 3)3	-0.329609044362272	0.108657115471988	-3.03347869056258	0.00243942932151697	-0.542573077351377	-0.116645011373166
Attention Score	PLoS Negl Trop Dis	log2(authors)	0.111589635253647	0.0429231204718883	2.59975588975947	0.0093773962571473	0.0274618650246721	0.195717405482622
Attention Score	PLoS Negl Trop Dis	log2(references + 1)	0.0177865820633855	0.0529415306048984	0.335966524959893	0.736920963241807	-0.0859769112086404	0.121550075335411
Attention Score	PLoS Negl Trop Dis	any_affil_usaTRUE	0.31635393009118	0.0652222884659283	4.85039604607619	1.2986828829239e-06	0.188520593708678	0.444187266473681
Attention Score	PLoS Negl Trop Dis	any_affil_nature_indexTRUE	0.39560856330337	0.0652093124851748	6.06674949062392	1.47869553122653e-09	0.267800659375809	0.523416467230931
Attention Score	PLoS Negl Trop Dis	last_author_pub_age	-0.00628507210113624	0.00392707269274572	-1.60044709962877	0.109610814703548	-0.0139819931435886	0.00141184894131611
Attention Score	PLoS Negl Trop Dis	PC1	0.00181473616013726	0.0133471355224597	0.13596446646425	0.891859021560336	-0.0243451687606588	0.0279746410809334
Attention Score	PLoS Negl Trop Dis	PC2	-0.137358195216289	0.021551852552373	-6.37338228268295	2.1506728414074e-10	-0.179599050019058	-0.0951173404135204
Attention Score	PLoS Negl Trop Dis	PC3	0.0599805031223159	0.0231754344234166	2.58810695957058	0.00969976046586224	0.0145574863263496	0.105403519918282
Attention Score	PLoS Negl Trop Dis	PC4	0.100992919085518	0.0246205365668984	4.10197880176585	4.21161751089797e-05	0.052737554134346	0.149248284036691
Attention Score	PLoS Negl Trop Dis	PC5	0.146798380409154	0.0263601202065844	5.5689571693412	2.80273993588358e-08	0.095133494176102	0.198463266642206
Attention Score	PLoS Negl Trop Dis	PC6	-0.0108946153968149	0.0274333754911794	-0.39712996311073	0.69130150949626	-0.0646630433338904	0.0428738125402606
Attention Score	PLoS Negl Trop Dis	PC7	-0.0374943345774737	0.0291781416716688	-1.28501448102432	0.19889216033002	-0.0946824413897519	0.0196937722348045
Attention Score	PLoS Negl Trop Dis	PC8	0.0957752024616387	0.0301013716468591	3.18175542248529	0.00147967069830297	0.0367775981485399	0.154772806774738
Attention Score	PLoS Negl Trop Dis	PC9	0.00257909659551569	0.0309600829193021	0.083303930491341	0.933615754257467	-0.05810155088469	0.0632597440757214
Attention Score	PLoS Negl Trop Dis	PC10	0.0163564795415893	0.033203095019929	0.492619122758644	0.622319868561664	-0.0487203908727328	0.0814333499559115
Attention Score	PLoS Negl Trop Dis	PC11	0.028926130442145	0.0333410655858829	0.867582662216794	0.385696243754475	-0.0364211573123733	0.0942734181966634
Attention Score	PLoS Negl Trop Dis	PC12	0.032453892728176	0.0338546664067117	0.958623911347775	0.337829957112612	-0.0339000341375968	0.0988078195939489
Attention Score	PLoS Negl Trop Dis	PC13	-0.042866934623797	0.0349193126728597	-1.22759961014681	0.219699191508733	-0.111307529827495	0.0255736605799011
Attention Score	PLoS Negl Trop Dis	PC14	0.0121614993041923	0.0363772204037729	0.334316343283089	0.738165579433761	-0.0591365425448782	0.0834595411532628
Attention Score	PLoS Negl Trop Dis	PC15	0.0239752339741559	0.0366525356624724	0.654122110266536	0.51308617525943	-0.0478624158663599	0.0958128838146717
Attention Score	PLoS Pathog	(Intercept)	1.89562341983797	0.544745876735519	3.47983068949105	0.000511796994919391	0.827941120709654	2.96330571896628
Attention Score	PLoS Pathog	preprintTRUE	0.914283918812927	0.200284081646466	4.56493552206903	5.28052884259566e-06	0.521734332109174	1.30683350551668
Attention Score	PLoS Pathog	ns(pub_date, df = 3)1	1.12581554094842	0.161072708732031	6.98948661018292	3.67417595058407e-12	0.810118832941333	1.44151224895552
Attention Score	PLoS Pathog	ns(pub_date, df = 3)2	1.88586340484108	0.31557536041294	5.97595262942383	2.67339552643847e-09	1.26734706402347	2.50437974565869
Attention Score	PLoS Pathog	ns(pub_date, df = 3)3	-0.37237593685667	0.152181944767174	-2.44691272296706	0.0144886863730015	-0.670647067697595	-0.0741048060157442
Attention Score	PLoS Pathog	log2(authors)	0.143995555006033	0.0487001203235649	2.95678027178008	0.00314279834822863	0.0485450731290786	0.239446036882987
Attention Score	PLoS Pathog	log2(references + 1)	-0.0296578558546112	0.0866488737840975	-0.34227629926858	0.732176660315387	-0.199486527772399	0.140170816063177
Attention Score	PLoS Pathog	any_affil_usaTRUE	0.064605374064842	0.0778918944063567	0.829423581968622	0.406957484980756	-0.0880599336592139	0.217270681788898
Attention Score	PLoS Pathog	any_affil_nature_indexTRUE	0.110034595731683	0.0840020938925007	1.30990301113799	0.190369571445814	-0.0546064829235709	0.274675674386936
Attention Score	PLoS Pathog	last_author_pub_age	-0.00796829885128075	0.00466248138537348	-1.70902534351726	0.0875915865166967	-0.0171065944452012	0.00116999674263968
Attention Score	PLoS Pathog	PC1	0.00546885612644375	0.020372378034402	0.268444661551475	0.788383000401498	-0.034460271100419	0.0453979833533065
Attention Score	PLoS Pathog	PC2	-0.152349684473815	0.025838654124693	-5.89619272500034	4.31315137850475e-09	-0.2029925159672	-0.101706852980429
Attention Score	PLoS Pathog	PC3	-0.00928170592638891	0.0274929465674963	-0.3376031704569	0.735695441110192	-0.0631668910275658	0.044603479174788
Attention Score	PLoS Pathog	PC4	-0.151728499891477	0.0289200372657691	-5.24648355384619	1.70356739801692e-07	-0.208410731363941	-0.0950462684190131
Attention Score	PLoS Pathog	PC5	-0.0624808398499028	0.0322668724243229	-1.93637731690427	0.0529533272545852	-0.125722747695324	0.000761067995518602
Attention Score	PLoS Pathog	PC6	-0.0501223160036874	0.0331984413522789	-1.5097791933008	0.131247748879117	-0.115190065397019	0.0149454333896444
Attention Score	PLoS Pathog	PC7	0.0425433539456354	0.0335730468628987	1.26718775687439	0.205226365221027	-0.0232586087569214	0.108345316648192
Attention Score	PLoS Pathog	PC8	0.0490441746545096	0.0356299704296963	1.37648653824403	0.168815389158183	-0.0207892841579222	0.118877633466941
Attention Score	PLoS Pathog	PC9	-0.00440773477114487	0.0356699684400856	-0.123569909475768	0.901667450080019	-0.0743195882433929	0.0655041187011032
Attention Score	PLoS Pathog	PC10	0.015286597921519	0.0363518509693067	0.420517731942345	0.674149599282583	-0.0559617207496896	0.0865349165927276
Attention Score	PLoS Pathog	PC11	0.0194189550363737	0.0369706960152738	0.525252622464859	0.599462128854411	-0.0530422776369414	0.0918801877096888
Attention Score	PLoS Pathog	PC12	0.0196840333348376	0.0373420000122992	0.527128523602227	0.598159106473918	-0.0535049417999631	0.0928730084696384
Attention Score	PLoS Pathog	PC13	-0.0807635104860527	0.0383401514012987	-2.10649951902164	0.035277404982347	-0.155908826394411	-0.00561819457769441
Attention Score	PLoS Pathog	PC14	0.0395619770409098	0.0385504855252271	1.02623810055572	0.304895620989851	-0.0359955861750681	0.115119540256888
Attention Score	PLoS Pathog	PC15	0.161896753370808	0.0389529022452253	4.15621799761152	3.36327511469369e-05	0.0855504678768565	0.238243038864759
Attention Score	Syst Biol	(Intercept)	2.14507723202747	0.620709789313655	3.45584566081899	0.000654641155579812	0.928508400121257	3.36164606393367
Attention Score	Syst Biol	preprintTRUE	0.225688245206808	0.246314122065357	0.916261898889109	0.360501912582992	-0.257078562924895	0.708455053338511
Attention Score	Syst Biol	ns(pub_date, df = 3)1	-0.319033362186709	0.438622632719709	-0.727352713672164	0.467759401391496	-1.17871792512148	0.54065120074806
Attention Score	Syst Biol	ns(pub_date, df = 3)2	2.22862674129547	0.864695095394133	2.57735559408909	0.0105888129210634	0.533855496714542	3.92339798587639
Attention Score	Syst Biol	ns(pub_date, df = 3)3	0.86346721457938	0.481339187571278	1.79388513729004	0.0741623405864049	-0.0799402574080949	1.80687468656685
Attention Score	Syst Biol	log2(authors)	0.188712459539579	0.10658500920349	1.77053472106282	0.0779802216749588	-0.0201903197911307	0.397615238870288
Attention Score	Syst Biol	log2(references + 1)	-0.0494841540281461	0.07610068021413	-0.650245883333881	0.516190947901086	-0.198638746446841	0.0996704383905484
Attention Score	Syst Biol	any_affil_usaTRUE	0.57123525511406	0.201556166614295	2.83412442650389	0.00500923421196562	0.176192427688088	0.966278082540033
Attention Score	Syst Biol	any_affil_nature_indexTRUE	0.0617915319182978	0.20000534412306	0.308949404273309	0.757643381247994	-0.33021173927844	0.453794803115036
Attention Score	Syst Biol	last_author_pub_age	-0.014286465482149	0.0178627424987667	-0.799791268509598	0.424667887150923	-0.0492967974448448	0.0207238664805469
Attention Score	Syst Biol	PC1	0.0173140397327084	0.0691838793987097	0.250261186322422	0.802611719136355	-0.118283872199525	0.152911951664942
Attention Score	Syst Biol	PC2	0.0886751486780423	0.0732620476599619	1.21038315895317	0.227390701681634	-0.0549158261691399	0.232266123525225
Attention Score	Syst Biol	PC3	-0.0459337010555626	0.0741577396738414	-0.619405354823204	0.536270529610536	-0.191280199991189	0.0994127978800637
Attention Score	Syst Biol	PC4	-0.00631208549312691	0.0804039668219775	-0.0785046527256859	0.937495786626236	-0.163900964678356	0.151276793692102
Attention Score	Syst Biol	PC5	0.0151887956158653	0.0853984258834275	0.177858027928976	0.858993086812287	-0.152189043452066	0.182566634683796
Attention Score	Syst Biol	PC6	-0.0488591782846986	0.0833999529872082	-0.585841796483896	0.558563841033562	-0.21232008245196	0.114601725882563
Attention Score	Syst Biol	PC7	0.0182285529873954	0.0896523340310912	0.203324912668462	0.839063227908555	-0.157486792843498	0.193943898818289
Attention Score	Syst Biol	PC8	-0.0397485684765742	0.0890643137705129	-0.446290627455932	0.655812748211894	-0.214311415774554	0.134814278821406
Attention Score	Syst Biol	PC9	0.0116823101400509	0.0966586752534711	0.120861475800449	0.903907667988296	-0.177765212150105	0.201129832430207
Attention Score	Syst Biol	PC10	-0.085405005831055	0.0980781247120196	-0.870785469051577	0.38479124774645	-0.277634597937841	0.106824586275731
Attention Score	Syst Biol	PC11	-0.219470280618218	0.100211540445911	-2.19006992250236	0.029537482228062	-0.415881290727482	-0.0230592705089538
Attention Score	Syst Biol	PC12	0.0309624775845617	0.103173934486592	0.300099804651584	0.764375663542556	-0.171254718152454	0.233179673321578
Attention Score	Syst Biol	PC13	0.0183942347177993	0.105524594206987	0.174312299952739	0.861775392832101	-0.188430169411098	0.225218638846697
Attention Score	Syst Biol	PC14	0.0943038043745323	0.109499453182835	0.861226258519024	0.390022221052493	-0.120311180190655	0.308918788939719
Attention Score	Syst Biol	PC15	0.00933777228346285	0.115154338947245	0.081089191851822	0.935442469694813	-0.216360584716655	0.23503612928358
Attention Score	eNeuro	(Intercept)	1.57143125126603	0.695382882984149	2.25980720796927	0.0241474440317901	0.208505845151471	2.9343566573806
Attention Score	eNeuro	preprintTRUE	0.169628823445445	0.248667871110166	0.682150141424161	0.495375283383974	-0.317751248042728	0.657008894933617
Attention Score	eNeuro	ns(pub_date, df = 3)1	1.10436803071278	0.268786571321672	4.1087172818285	4.46168248194671e-05	0.577556031394297	1.63118003003126
Attention Score	eNeuro	ns(pub_date, df = 3)2	0.497150734778876	0.674253136135777	0.737335442928904	0.461171602743639	-0.82436112851043	1.81866259806818
Attention Score	eNeuro	ns(pub_date, df = 3)3	0.976356184698876	0.25487332925468	3.83075070096196	0.000139519643042592	0.476813638739884	1.47589873065787
Attention Score	eNeuro	log2(authors)	0.206948876763577	0.086973983974203	2.37943425501767	0.0176129121906123	0.0364830005821749	0.377414752944978
Attention Score	eNeuro	log2(references + 1)	-0.0145474331728535	0.103658304070012	-0.140340258345612	0.888432534070695	-0.217713975848579	0.188619109502872
Attention Score	eNeuro	any_affil_usaTRUE	0.0510772934273946	0.139906098342747	0.365082680686754	0.715162709664698	-0.223133620541908	0.325288207396697
Attention Score	eNeuro	any_affil_nature_indexTRUE	0.260210349748485	0.139230114725462	1.86892289977334	0.0620613368645335	-0.0126756606767997	0.533096360173769
Attention Score	eNeuro	last_author_pub_age	-0.0198149188667716	0.0078643715616844	-2.51958070792469	0.0119764971946375	-0.035228803888714	-0.00440103384482913
Attention Score	eNeuro	PC1	-0.153075526505912	0.0285062746876701	-5.36988884668685	1.08111840948009e-07	-0.208946798227151	-0.0972042547846723
Attention Score	eNeuro	PC2	-0.0457910153230601	0.0487767830759501	-0.938787112134048	0.348171921765319	-0.141391753433645	0.0498097227875248
Attention Score	eNeuro	PC3	0.11871941310967	0.0464352193461443	2.55666743436042	0.0107831357288685	0.0277080555770095	0.20973077064233
Attention Score	eNeuro	PC4	-0.00620814809602532	0.0511224244219407	-0.121436887358592	0.903380719005725	-0.1064062587654	0.0939899625733493
Attention Score	eNeuro	PC5	-0.0727271813189737	0.0534421985719277	-1.36085683715071	0.174007794218643	-0.17747196577459	0.0320176031366426
Attention Score	eNeuro	PC6	-0.0443169351088548	0.0553215588903978	-0.801078928318974	0.423364535715305	-0.152745198102646	0.0641113278849364
Attention Score	eNeuro	PC7	-0.087882667487396	0.0575182793550586	-1.52790849227076	0.126998215910443	-0.200616423476024	0.0248510885012325
Attention Score	eNeuro	PC8	0.0794768817246249	0.0585319706769174	1.35783710689186	0.174963786923359	-0.0352436727462876	0.194197436195537
Attention Score	eNeuro	PC9	-0.0273246124790384	0.0590230993739729	-0.462947774157173	0.643549267834236	-0.143007761507954	0.0883585365498771
Attention Score	eNeuro	PC10	-0.0127593235346655	0.0609848837672612	-0.209221084742234	0.83433803889227	-0.132287499319859	0.106768852250528
Attention Score	eNeuro	PC11	-0.0292243264839121	0.0609002737761428	-0.479871840828416	0.631472159147708	-0.148586669733781	0.0901380167659568
Attention Score	eNeuro	PC12	-0.011516926482616	0.061856795691142	-0.186186923424248	0.85235346225007	-0.132754018236307	0.109720165271075
Attention Score	eNeuro	PC13	0.04526198463491	0.0618800659505348	0.731446935933958	0.46475707778151	-0.0760207159891016	0.166544685258922
Attention Score	eNeuro	PC14	-0.0154106065071905	0.0629997994882305	-0.24461358023956	0.806829116609146	-0.138887944537367	0.108066731522986
Attention Score	eNeuro	PC15	0.0467477200965297	0.0648543462701809	0.720810906053704	0.471272499491086	-0.0803644628339144	0.173859903026974
