# Supplementary material for: Releasing a preprint is associated with more attention and citations for the peer-reviewed article
Source: eLife journal article supplement (doi:10.7554/elife.52646), 2019-12-06
Supplement: supp [file elife-52646-supp-v1.zip › elife_poa_e52646_Supplementary_file_8.csv]

Metric	Variable	Coefficient	Standard error	95% CI (lower)	95% CI (upper)	p-value	Adjusted p-value
citations	(Intercept)	2.84753210323436	0.188902059597333	2.46511987623457	3.22994433023415	1.28250538546518e-17	2.56501077093036e-17
citations	preprintTRUE	0.442426407944283	0.0309768524993802	0.379717048528176	0.50513576736039	7.37979474908732e-17	7.37979474908732e-17
citations	ns(pub_date, df = 3)1	-1.03882041540603	0.0441721236449246	-1.12824220472042	-0.94939862609165	3.00296515441048e-24	6.00593030882096e-24
citations	ns(pub_date, df = 3)2	-2.95184063976659	0.0697031328098151	-3.09294725503316	-2.81073402450002	1.36913580083314e-33	2.73827160166627e-33
citations	ns(pub_date, df = 3)3	-2.67513648573909	0.0643652088452782	-2.80543703888445	-2.54483593259373	2.75175685724203e-33	5.50351371448406e-33
citations	log2(authors)	0.181158189207796	0.00907800741676823	0.162780723973341	0.199535654442251	9.75505011954292e-22	1.95101002390858e-21
citations	log2(references + 1)	0.217001053510133	0.0202563010848953	0.175994315811428	0.258007791208839	4.86735989212163e-13	9.73471978424325e-13
citations	any_affil_usaTRUE	0.0793390406450131	0.0110790496440024	0.0569106772040038	0.101767404086023	1.4900518706563e-08	2.98010374131261e-08
citations	any_affil_nature_indexTRUE	0.100411626923449	0.0145728393752933	0.0709104559404783	0.129912797906419	3.46220491094559e-08	3.46220491094559e-08
citations	last_author_pub_age	-0.0026432450439657	0.000601441441278855	-0.00386079958762542	-0.00142569050030599	8.60812697096769e-05	8.60812697096769e-05
Attention Score	(Intercept)	1.74478247159468	0.198193048961393	1.34356161994932	2.14600332324004	1.04095625169447e-10	1.04095625169447e-10
Attention Score	preprintTRUE	0.57455839039301	0.0359753659340681	0.501730069551485	0.647386711234535	1.9107365937849e-18	3.8214731875698e-18
Attention Score	ns(pub_date, df = 3)1	0.411501689291391	0.111520151749548	0.18574094493103	0.637262433651753	0.000700155647081377	0.000700155647081377
Attention Score	ns(pub_date, df = 3)2	0.825649254370609	0.125981802578185	0.570612428472221	1.080686080269	9.93825770783775e-08	9.93825770783775e-08
Attention Score	ns(pub_date, df = 3)3	0.206104269168694	0.0929297356210299	0.0179778547235989	0.394230683613789	0.0326179884195039	0.0326179884195039
Attention Score	log2(authors)	0.128507184375828	0.0145971650184785	0.0989567687027607	0.158057600048896	1.0405840036941e-10	1.0405840036941e-10
Attention Score	log2(references + 1)	0.0701360952961677	0.0212391296086901	0.0271397252697655	0.11313246532257	0.0020952214683778	0.0020952214683778
Attention Score	any_affil_usaTRUE	0.143299812479465	0.0213545446870008	0.100069796842104	0.186529828116827	6.07637932545979e-08	6.07637932545979e-08
Attention Score	any_affil_nature_indexTRUE	0.14715341154495	0.0203528585399294	0.105951203497791	0.188355619592109	1.2033779466725e-08	2.406755893345e-08
Attention Score	last_author_pub_age	-0.00879016458033954	0.00106925659288356	-0.0109547613866974	-0.00662556777398166	5.85933352139044e-10	1.17186670427809e-09
