# Supplementary material for: Releasing a preprint is associated with more attention and citations for the peer-reviewed article
Source: eLife journal article supplement (doi:10.7554/elife.52646), 2019-12-06
Supplement: supp [file elife-52646-supp-v1.zip › elife_poa_e52646_Supplementary_file_9.csv]

Metric	Journal	Variable	Coefficient	Standard error	t-statistic	p-value	95% CI (lower)	95% CI (upper)
citations	Am J Hum Genet	(Intercept)	3.01628328977997	0.373738827574272	8.07056443494769	3.18109506577813e-15	2.28376864811017	3.74879793144976
citations	Am J Hum Genet	preprintTRUE	0.435910388423485	0.247507333047421	1.7612019129145	0.0786542900675016	-0.0491950702590202	0.921015847105991
citations	Am J Hum Genet	preprint_age	0.196401347845953	0.364621857422587	0.538643923417704	0.590309113725881	-0.518244360678416	0.911047056370322
citations	Am J Hum Genet	ns(pub_date, df = 3)1	-0.9394955326487	0.167550425661536	-5.60724050051983	2.99249060040361e-08	-1.26788833253967	-0.611102732757735
citations	Am J Hum Genet	ns(pub_date, df = 3)2	-2.97484428114846	0.311419951001952	-9.55251669514846	2.2523432589253e-20	-3.58521616917951	-2.3644723931174
citations	Am J Hum Genet	ns(pub_date, df = 3)3	-2.9090604155067	0.136042550177829	-21.3834598932768	5.87026259220089e-78	-3.17569891422023	-2.64242191679317
citations	Am J Hum Genet	log2(authors)	0.106528162142604	0.0353110702902735	3.01684885977379	0.00264964670511874	0.0373197361181055	0.175736588167102
citations	Am J Hum Genet	log2(references + 1)	0.346641726398003	0.0645955910094414	5.36633725275983	1.10372901130489e-07	0.220036694459419	0.473246758336588
citations	Am J Hum Genet	any_affil_usaTRUE	-0.00369845613611875	0.0862304188439442	-0.042890388168148	0.965801520068555	-0.172706971442053	0.165310059169816
citations	Am J Hum Genet	any_affil_nature_indexTRUE	0.0186474361816055	0.123704751020949	0.150741471347755	0.88022442743155	-0.223809420535948	0.261104292899159
citations	Am J Hum Genet	last_author_pub_age	-0.00526769465090564	0.00469276540284638	-1.12251395471645	0.26204074320573	-0.0144653458283801	0.00392995652656886
citations	Am J Hum Genet	PC1	-0.045491677052014	0.0190195726287925	-2.39183487136546	0.0170354539143549	-0.0827693544057911	-0.00821399969823683
citations	Am J Hum Genet	PC2	-0.00842068892586623	0.0229746262837514	-0.366521257924516	0.714090333442829	-0.0534501290002863	0.0366087511485538
citations	Am J Hum Genet	PC3	-0.0141696165647375	0.0237842039952808	-0.59575744336657	0.551535802375961	-0.0607857997964415	0.0324465666669666
citations	Am J Hum Genet	PC4	-0.104480801199951	0.0250517181323295	-4.17060421357359	3.43186013081884e-05	-0.153581266490166	-0.0553803359097363
citations	Am J Hum Genet	PC5	0.00329510787007397	0.0277270829520323	0.118840769358049	0.905436657731572	-0.0510489761122639	0.0576391918524119
citations	Am J Hum Genet	PC6	-0.0642146699909677	0.0285861918059389	-2.24635272955899	0.0250020519417738	-0.120242576385762	-0.00818676359617343
citations	Am J Hum Genet	PC7	-0.0545370836395942	0.0308564424443661	-1.76744560679424	0.0776027387719468	-0.115014599521585	0.00594043224239646
citations	Am J Hum Genet	PC8	0.00877246533287655	0.0311053509663047	0.282024316085662	0.778010801845026	-0.0521929022875588	0.0697378329533119
citations	Am J Hum Genet	PC9	-0.0217362790173971	0.0313502800099002	-0.69333604071584	0.488335783533619	-0.0831816987420474	0.0397091407072532
citations	Am J Hum Genet	PC10	0.000725568694668956	0.0322599848001523	0.0224912906550883	0.98206266705573	-0.0625028396554392	0.0639539770447771
citations	Am J Hum Genet	PC11	0.0251709028344117	0.0322900816767632	0.779524285084896	0.435942550652868	-0.0381164943099008	0.0884582999787242
citations	Am J Hum Genet	PC12	0.0030154858493646	0.0332836242490831	0.090599684301137	0.927837402044721	-0.0622192189538022	0.0682501906525314
citations	Am J Hum Genet	PC13	-0.0286002219020193	0.0334029877657649	-0.856217476789066	0.392179551911818	-0.0940688748989504	0.0368684310949119
citations	Am J Hum Genet	PC14	-0.000126749427893931	0.0341555927209029	-0.0037109421268032	0.997040193343858	-0.0670704810314821	0.0668169821756942
citations	Am J Hum Genet	PC15	-0.00836106433668942	0.0345029550331084	-0.242328934685921	0.808598470170344	-0.075985613561787	0.0592634848884081
citations	BMC Bioinformatics	(Intercept)	1.47216045100077	0.243815728792578	6.03800443183543	1.84211891330361e-09	0.994290403702933	1.95003049829861
citations	BMC Bioinformatics	preprintTRUE	0.616688877246127	0.210298468009844	2.93244588551763	0.00339967429133048	0.204511453942885	1.02886630054937
citations	BMC Bioinformatics	preprint_age	-0.205727644036801	0.2711108748906	-0.75883213508059	0.448038710972121	-0.737095194639521	0.325639906565919
citations	BMC Bioinformatics	ns(pub_date, df = 3)1	-0.908158100932519	0.115560424477425	-7.8587293620571	6.16410896901442e-15	-1.13465237094643	-0.681663830918606
citations	BMC Bioinformatics	ns(pub_date, df = 3)2	-2.43457697899398	0.24630568293651	-9.88437193153008	1.50981940983286e-22	-2.91732724673708	-1.95182671125088
citations	BMC Bioinformatics	ns(pub_date, df = 3)3	-2.14086483623595	0.0935067680031848	-22.8952928430061	1.10923661950442e-103	-2.32413473383294	-1.95759493863897
citations	BMC Bioinformatics	log2(authors)	0.0986063835193568	0.0359897228992523	2.73984836714054	0.0061990933163042	0.0280678228232459	0.169144944215468
citations	BMC Bioinformatics	log2(references + 1)	0.274864951293697	0.0416897840469384	6.59310086577153	5.4406016600991e-11	0.193154476038446	0.356575426548949
citations	BMC Bioinformatics	any_affil_usaTRUE	0.0350177301587872	0.0593813731354214	0.589708999805847	0.555449625839792	-0.0813676225391731	0.151403082856747
citations	BMC Bioinformatics	any_affil_nature_indexTRUE	0.197669750452096	0.0595548086288584	3.319123258106	0.00091854330659253	0.0809444704333583	0.314395030470834
citations	BMC Bioinformatics	last_author_pub_age	0.00568613096652264	0.00462078794565459	1.23055440617436	0.218628307198542	-0.00337044698715717	0.0147427089202025
citations	BMC Bioinformatics	PC1	0.0683281225315784	0.019340406499978	3.53292070317426	0.000419931118004944	0.0304216223452571	0.1062346227179
citations	BMC Bioinformatics	PC2	0.000297493029353594	0.0203163153070652	0.0146430602625141	0.988318346097442	-0.0395217532710539	0.0401167393297611
citations	BMC Bioinformatics	PC3	0.0707018650060524	0.0208565626905844	3.38990973991944	0.000712172953581651	0.0298237532912052	0.1115799767209
citations	BMC Bioinformatics	PC4	-0.0452687604590632	0.0222033923657867	-2.03882180314113	0.0415936521250008	-0.0887866098306167	-0.00175091108750974
citations	BMC Bioinformatics	PC5	-0.0587881694991262	0.0236413372628149	-2.48666853509988	0.0129722221736016	-0.105124339080608	-0.0124519999176442
citations	BMC Bioinformatics	PC6	0.0265110453278629	0.0249191653037409	1.06388175545684	0.287505404588719	-0.0223296211922693	0.0753517118479951
citations	BMC Bioinformatics	PC7	0.0583458863781853	0.025135157025453	2.32128593106069	0.0203673427891344	0.00908188386253843	0.107609888893832
citations	BMC Bioinformatics	PC8	0.0169458896710863	0.0253661442805786	0.668051458023947	0.504174652445565	-0.0327708395454944	0.066662618887667
citations	BMC Bioinformatics	PC9	0.0444439349762081	0.0262541948902366	1.69283176124878	0.0906368164288699	-0.00701334145175119	0.0959012114041674
citations	BMC Bioinformatics	PC10	-0.0451417441431465	0.0263675235605294	-1.71202062414086	0.0870414998896317	-0.0968211406832955	0.00653765239700248
citations	BMC Bioinformatics	PC11	-0.0158053953999244	0.026698617722519	-0.591993022417537	0.553919415311752	-0.0681337245730644	0.0365229337732156
citations	BMC Bioinformatics	PC12	0.051500678609195	0.027182341501276	1.89463731837735	0.0582786458088735	-0.00177573174877432	0.104777088967164
citations	BMC Bioinformatics	PC13	0.0809787794346789	0.0278589639372337	2.90674052405984	0.00369069152749523	0.0263762134711006	0.135581345398257
citations	BMC Bioinformatics	PC14	0.000887656108473285	0.0280319632571553	0.031665855877815	0.974741553628977	-0.0540539822915012	0.0558292945084478
citations	BMC Bioinformatics	PC15	0.013076298934445	0.0286632797050068	0.45620386323624	0.648290878644916	-0.0431026969661661	0.0692552948350561
citations	BMC Genomics	(Intercept)	1.656234838091	0.185639646692692	8.9217732720249	6.81060830240265e-19	1.29238781647059	2.02008185971142
citations	BMC Genomics	preprintTRUE	0.75759794879855	0.154753755474387	4.89550606688792	1.01864546123686e-06	0.454286161596434	1.06090973600067
citations	BMC Genomics	preprint_age	-0.341333098528528	0.21880153205829	-1.56001237887857	0.11883491528331	-0.770176221124962	0.0875100240679052
citations	BMC Genomics	ns(pub_date, df = 3)1	-0.965800739580585	0.0729963590572859	-13.230807016315	3.72703375534091e-39	-1.10887097433542	-0.82273050482575
citations	BMC Genomics	ns(pub_date, df = 3)2	-3.33353084545541	0.159942689263654	-20.8420332357944	9.8013974568229e-92	-3.64701275600265	-3.02004893490816
citations	BMC Genomics	ns(pub_date, df = 3)3	-2.82760054843392	0.0603370932015427	-46.8633869879835	0	-2.94585907804078	-2.70934201882706
citations	BMC Genomics	log2(authors)	0.199409539075326	0.0217485861003815	9.1688507084986	7.42010641741654e-20	0.15678309360391	0.242035984546742
citations	BMC Genomics	log2(references + 1)	0.330431898249627	0.0290224002771362	11.3854090321379	1.38345570761151e-29	0.273549038961535	0.387314757537719
citations	BMC Genomics	any_affil_usaTRUE	0.091689300568826	0.0359247540399423	2.55225966103715	0.0107389841213668	0.0212780764970793	0.162100524640573
citations	BMC Genomics	any_affil_nature_indexTRUE	0.0152370161783917	0.0354919319444123	0.429309292102105	0.667720940964209	-0.054325892174403	0.0847999245311863
citations	BMC Genomics	last_author_pub_age	-0.00150085267506379	0.00236518888609581	-0.634559330075847	0.525751622912523	-0.00613653770844599	0.0031348323583184
citations	BMC Genomics	PC1	0.0135957169537608	0.00983095262103933	1.38295010441455	0.166756234892306	-0.00567259611719589	0.0328640300247176
citations	BMC Genomics	PC2	-0.0723214164744612	0.0118678438793763	-6.09389685350846	1.20442806587658e-09	-0.095581963052183	-0.0490608698967395
citations	BMC Genomics	PC3	0.0295477074173074	0.0117226454186921	2.52056650712925	0.0117546389569944	0.00657174459313743	0.0525236702414775
citations	BMC Genomics	PC4	0.00811490513958223	0.0127845204516822	0.634744585864732	0.525630784600004	-0.0169422945053307	0.0331721047844951
citations	BMC Genomics	PC5	0.0117252691180158	0.0133666716526667	0.877201851193566	0.380428925626402	-0.0144729259143835	0.0379234641504151
citations	BMC Genomics	PC6	-0.0707267438837233	0.0147843716675891	-4.78388567833244	1.78045723558167e-06	-0.0997035798862522	-0.0417499078811943
citations	BMC Genomics	PC7	0.0149829686057352	0.0152195485158491	0.984455523771444	0.324950265513365	-0.0148467983462892	0.0448127355577595
citations	BMC Genomics	PC8	0.0276972292763352	0.0152523950813653	1.8159265563593	0.0694553842632326	-0.00219691576111669	0.0575913743137871
citations	BMC Genomics	PC9	-0.0140641303205614	0.0158228266858266	-0.888850683876825	0.374136003716324	-0.0450763007584007	0.0169480401172779
citations	BMC Genomics	PC10	-0.00648162653924794	0.0162742464412726	-0.398275063772542	0.690448386789387	-0.0383785634396715	0.0254153103611756
citations	BMC Genomics	PC11	-0.0207928425934283	0.0164528396357576	-1.26378443197358	0.20637998522254	-0.0530398157229264	0.0114541305360697
citations	BMC Genomics	PC12	0.012058186072248	0.0169761783177658	0.710300389554046	0.477558684478642	-0.0212145120257027	0.0453308841701986
citations	BMC Genomics	PC13	-0.0572813724152073	0.0170110757535975	-3.36729864971023	0.000766148776453592	-0.0906224682305409	-0.0239402765998736
citations	BMC Genomics	PC14	0.0159522757487098	0.0174456339126184	0.914399317824246	0.360561374167919	-0.0182405384074929	0.0501450899049126
citations	BMC Genomics	PC15	-0.0183134402712982	0.0174949416213642	-1.04678487460253	0.295261137095181	-0.0526028957608029	0.0159760152182064
citations	Bioinformatics	(Intercept)	2.60376267842678	0.181568031568253	14.3404246658256	6.08866134192209e-45	2.24789587580917	2.95962948104439
citations	Bioinformatics	preprintTRUE	1.00511470472336	0.179503674627441	5.59941018928706	2.37664446302923e-08	0.653293967360983	1.35693544208575
citations	Bioinformatics	preprint_age	-0.445079205716138	0.276802903398671	-1.60792824154414	0.10797249832681	-0.987602927193652	0.0974445157613762
citations	Bioinformatics	ns(pub_date, df = 3)1	-1.54125008414535	0.134987675392805	-11.4177096513472	1.7034714272399e-29	-1.80582106627203	-1.27667910201867
citations	Bioinformatics	ns(pub_date, df = 3)2	-3.13125138717703	0.272817808255706	-11.4774449923085	8.84098884540685e-30	-3.66596446569937	-2.59653830865469
citations	Bioinformatics	ns(pub_date, df = 3)3	-1.92550854545343	0.160883533270769	-11.9683382525716	3.59710475913729e-32	-2.24083447636969	-1.61018261453717
citations	Bioinformatics	log2(authors)	0.129715246376232	0.0389779221451099	3.32791588769969	0.000887188012526964	0.053319922779611	0.206110569972854
citations	Bioinformatics	log2(references + 1)	0.250174115560638	0.0292933103602478	8.54031560393852	2.2440216834503e-17	0.192760282266598	0.307587948854678
citations	Bioinformatics	any_affil_usaTRUE	0.115749662115655	0.0619526781616597	1.86835606708747	0.0618250154946464	-0.00567535582699953	0.237174680058309
citations	Bioinformatics	any_affil_nature_indexTRUE	0.122833619948137	0.0616600814966777	1.9921092701565	0.0464636483017626	0.00198208093084376	0.24368515896543
citations	Bioinformatics	last_author_pub_age	-0.00537566869232264	0.00470258847140257	-1.14312973057566	0.253090139102513	-0.0145925727303849	0.00384123534573966
citations	Bioinformatics	PC1	0.00363757997538331	0.0210729000005748	0.172618860018511	0.862964482526554	-0.0376645450755573	0.044939705026324
citations	Bioinformatics	PC2	-0.0419562350746738	0.0237903215931175	-1.76358419159881	0.0779196272398936	-0.0885844085778097	0.00467193842846213
citations	Bioinformatics	PC3	-0.10329204039144	0.0260095708469947	-3.97130890775057	7.34219922517216e-05	-0.154269862504892	-0.0523142182779871
citations	Bioinformatics	PC4	0.0543457024898552	0.0264734901427286	2.05283482445484	0.0401886288557633	0.00245861526503108	0.106232789714679
citations	Bioinformatics	PC5	0.0257370259268721	0.0273327472088864	0.941618701193143	0.346475504524884	-0.0278341742010829	0.079308226054827
citations	Bioinformatics	PC6	0.0608181856909418	0.028969191282955	2.09940916530611	0.0358771667525171	0.00403961411509823	0.117596757266785
citations	Bioinformatics	PC7	-0.0317715057694078	0.0289743780371775	-1.0965379732618	0.272945122459591	-0.088560243196724	0.0250172316579084
citations	Bioinformatics	PC8	-0.0479076486929496	0.0300354830288738	-1.59503506725345	0.110826119556095	-0.106776113687806	0.010960816301907
citations	Bioinformatics	PC9	-0.051707462689565	0.0310000695970259	-1.66797892268364	0.095440513415652	-0.112466482617971	0.00905155723884084
citations	Bioinformatics	PC10	-0.0421355640805068	0.0314612356053772	-1.33928510021092	0.180595121052865	-0.103798452776175	0.0195273246151616
citations	Bioinformatics	PC11	0.0353831202478674	0.0317942653358546	1.11287742849544	0.265864113623746	-0.0269324947253178	0.0976987352210527
citations	Bioinformatics	PC12	0.0884040864230105	0.0323421135547774	2.73340473785925	0.00631083593954042	0.0250147086717421	0.151793464174279
citations	Bioinformatics	PC13	-0.026988569772539	0.033141585845826	-0.814341531455051	0.415524016074358	-0.0919448844209004	0.0379677448758224
citations	Bioinformatics	PC14	0.0226470653179773	0.0338438253265568	0.669163875521084	0.503450451221256	-0.0436856134211384	0.0889797440570931
citations	Bioinformatics	PC15	-0.0510483011160096	0.0345179000860186	-1.47889358821937	0.139290081648485	-0.118702142106558	0.0166055398745388
citations	Biophys J	(Intercept)	1.82106216376554	0.264363405137155	6.88848050970121	7.68654459638569e-12	1.30291941086634	2.33920491666473
citations	Biophys J	preprintTRUE	0.130024981521625	0.214719648751478	0.605556977564353	0.54488277907887	-0.290817796804363	0.550867759847613
citations	Biophys J	preprint_age	0.606021448399244	0.381590558692559	1.58814581386827	0.112423148945248	-0.14188230347869	1.35392520027718
citations	Biophys J	ns(pub_date, df = 3)1	-0.751863438968545	0.1047121686681	-7.18028714839897	1.00106465579074e-12	-0.957095518301104	-0.546631359635985
citations	Biophys J	ns(pub_date, df = 3)2	-2.57362380186448	0.198701600302093	-12.9522047026883	8.43088279294653e-37	-2.96307178212705	-2.1841758216019
citations	Biophys J	ns(pub_date, df = 3)3	-2.44725546138837	0.0952765227363899	-25.6858184062763	8.35753796650696e-125	-2.63399401452391	-2.26051690825283
citations	Biophys J	log2(authors)	0.18912690062497	0.0328712009009923	5.753574418976	1.01935049887253e-08	0.124700530730445	0.253553270519496
citations	Biophys J	log2(references + 1)	0.267728452281874	0.0434837916122293	6.15697119214826	9.0596088633794e-10	0.182501786810659	0.352955117753088
citations	Biophys J	any_affil_usaTRUE	0.1531228331493	0.0483426075272047	3.16745084681522	0.00156274622921779	0.058373063477224	0.247872602821376
citations	Biophys J	any_affil_nature_indexTRUE	0.071979009154057	0.0493113667551416	1.459683920575	0.144545647825687	-0.0246694937144663	0.16862751202258
citations	Biophys J	last_author_pub_age	-0.00248534388286883	0.00304204963592144	-0.816996492601942	0.414034950173806	-0.00844765160845804	0.00347696384272038
citations	Biophys J	PC1	-0.0478238917436245	0.015375996789977	-3.1102953777149	0.00189732931872368	-0.0779602916783828	-0.0176874918088662
citations	Biophys J	PC2	-0.0392020266666617	0.017968203969481	-2.18174430417455	0.0292530721001876	-0.0744190593137141	-0.00398499401960926
citations	Biophys J	PC3	0.0203067728300875	0.0191844065641138	1.05850409092524	0.289962982796812	-0.0172939731003494	0.0579075187605243
citations	Biophys J	PC4	0.0964681262898911	0.0199236433334405	4.84189185057213	1.39227828126861e-06	0.0574185029155262	0.135517749664256
citations	Biophys J	PC5	-0.074570105211059	0.0211172401907765	-3.53124293408517	0.000423676056433182	-0.115959135437863	-0.0331810749842553
citations	Biophys J	PC6	0.018850081537659	0.0211559529059584	0.891006026599256	0.373041052220381	-0.022614824216645	0.060314987291963
citations	Biophys J	PC7	0.029999496915977	0.0221575200971845	1.35391942710181	0.175926387111319	-0.0134284444612271	0.0734274382931811
citations	Biophys J	PC8	0.0114098144118624	0.0223363573296308	0.510818046267843	0.609539028077197	-0.0323686415000312	0.055188270323756
citations	Biophys J	PC9	0.00610496502218647	0.0228079547996441	0.267668235745616	0.788984347667966	-0.0385978049461334	0.0508077349905063
citations	Biophys J	PC10	-0.101800316774778	0.0230405827942921	-4.41830476614496	1.05200589609559e-05	-0.146959029234404	-0.0566416043151526
citations	Biophys J	PC11	0.0072367041990664	0.0236295816858575	0.306256128241052	0.759443878973426	-0.0390764248749616	0.0535498332730944
citations	Biophys J	PC12	0.053588282099534	0.0244360155036086	2.19300409641745	0.0284303898466369	0.00569457178679874	0.101481992412269
citations	Biophys J	PC13	0.00108785765097894	0.0243478252914487	0.044679869267873	0.964367270553075	-0.046633003022134	0.0488087183240919
citations	Biophys J	PC14	-0.017501009822355	0.024942113026581	-0.701665083615972	0.482975741456957	-0.0663866530527811	0.0313846334080711
citations	Biophys J	PC15	0.0280375846267918	0.0253019396023271	1.10811997291358	0.267953121350475	-0.0215533057327771	0.0776284749863606
citations	Cell	(Intercept)	5.44230678562898	0.391096397208152	13.9155124528862	1.95917528950564e-41	4.67577193261763	6.20884163864033
citations	Cell	preprintTRUE	0.496360896366744	0.251348739177629	1.97478968062762	0.0484796631479585	0.00372642001904061	0.988995372714448
citations	Cell	preprint_age	-0.122395492032171	0.414012514479239	-0.295632348664931	0.767552790522375	-0.933845109560346	0.689054125496005
citations	Cell	ns(pub_date, df = 3)1	-0.951410466695164	0.11456653509745	-8.30443607189391	2.25539204987107e-16	-1.17595674931971	-0.726864184070618
citations	Cell	ns(pub_date, df = 3)2	-3.28297738152402	0.226918477331273	-14.4676512029087	1.93205599182399e-44	-3.72772942451998	-2.83822533852805
citations	Cell	ns(pub_date, df = 3)3	-3.01366680254338	0.0945087466392975	-31.8877025641378	6.98187829960088e-170	-3.19890054218042	-2.82843306290633
citations	Cell	log2(authors)	0.279741122209744	0.0265015342534963	10.5556576284952	3.73294129378919e-25	0.227799069537837	0.331683174881652
citations	Cell	log2(references + 1)	0.147447376080693	0.0631281340037826	2.33568405604794	0.0196421523319047	0.0237185070220607	0.271176245139325
citations	Cell	any_affil_usaTRUE	0.0278897023447913	0.0658805278651027	0.423337566479407	0.672111170687842	-0.101233759553297	0.15701316424288
citations	Cell	any_affil_nature_indexTRUE	-0.100938532302991	0.0913159511120799	-1.1053767832862	0.269177979676864	-0.279914507696688	0.0780374430907058
citations	Cell	last_author_pub_age	-0.00880663089075949	0.00302818260808328	-2.90822319210588	0.00368969433487137	-0.0147417597412133	-0.00287150204030568
citations	Cell	PC1	-0.0735334481016372	0.0156600970484865	-4.6955933845087	2.90735146669784e-06	-0.104226674311073	-0.0428402218922018
citations	Cell	PC2	0.0601025792386641	0.0179494949367368	3.34842732068486	0.000833352566769461	0.0249222156219759	0.0952829428553524
citations	Cell	PC3	0.0958704336179066	0.0219598213595014	4.36572010529705	1.35599609319532e-05	0.0528299746463505	0.138910892589463
citations	Cell	PC4	0.00855501760557252	0.0231021144029187	0.370313186765784	0.711202716815775	-0.0367242945908721	0.0538343298020172
citations	Cell	PC5	-0.0177102201871796	0.0240039652510269	-0.737803942055861	0.460751837174149	-0.0647571275653432	0.0293366871909841
citations	Cell	PC6	-0.0431754573509491	0.0252989589209707	-1.70661004216898	0.0881066255143523	-0.0927605056824099	0.00640959098051176
citations	Cell	PC7	0.0555482851346997	0.0257617176769061	2.15623375084557	0.0312278641670708	0.00505624630807493	0.106040323961325
citations	Cell	PC8	-0.0136085115510328	0.0261675492755946	-0.520052963604234	0.603105287551104	-0.0648959656948753	0.0376789425928098
citations	Cell	PC9	-0.0634300178142505	0.0264158401714907	-2.40121144746732	0.0164649489803815	-0.115204113171739	-0.0116559224567624
citations	Cell	PC10	0.0356778512466569	0.0271539965814433	1.31390792289628	0.189083035008428	-0.0175430040892957	0.0888987065826095
citations	Cell	PC11	0.00825179785512155	0.0276069486541894	0.298902930508017	0.765056533278039	-0.0458568272301362	0.0623604229403793
citations	Cell	PC12	-0.0750530790592728	0.0285502620634621	-2.62880525903557	0.008658211983014	-0.131010564452839	-0.019095593665707
citations	Cell	PC13	0.0107716475999841	0.0296140574754526	0.363734270756813	0.716108968267613	-0.0472708384880022	0.0688141336879704
citations	Cell	PC14	0.0691092605184063	0.0305854493599024	2.25954700567547	0.0239958701349131	0.00916288132202396	0.129055639714789
citations	Cell	PC15	0.0391011657172023	0.0336234105661671	1.1629149172793	0.245053542042051	-0.0267995080298887	0.105001839464293
citations	Cell Rep	(Intercept)	3.816349501131	0.251007408034539	15.2041309498159	2.03279756220059e-50	3.32438402153056	4.30831498073145
citations	Cell Rep	preprintTRUE	0.383695958282802	0.250003571701387	1.53476190628629	0.124943651443151	-0.106302038258294	0.873693954823898
citations	Cell Rep	preprint_age	0.43325685288946	0.397227823067085	1.0907011738105	0.275488564913077	-0.345295373979274	1.21180907975819
citations	Cell Rep	ns(pub_date, df = 3)1	-0.965704700114034	0.0759191436144986	-12.7201737814336	3.55539817253763e-36	-1.11450348733558	-0.816905912892493
citations	Cell Rep	ns(pub_date, df = 3)2	-2.75208278134691	0.186453240283019	-14.7601767454913	1.03480149321644e-47	-3.11752441710242	-2.3866411455914
citations	Cell Rep	ns(pub_date, df = 3)3	-1.77732992633663	0.0609244608836899	-29.1726820485076	1.16599740232684e-165	-1.89673967544618	-1.65792017722707
citations	Cell Rep	log2(authors)	0.215795412811496	0.0216266757660572	9.97820539531018	4.19594048068669e-23	0.173407907204698	0.258182918418293
citations	Cell Rep	log2(references + 1)	0.147632280557751	0.0425792887308824	3.46723219100356	0.000532950715184878	0.0641784081578891	0.231086152957613
citations	Cell Rep	any_affil_usaTRUE	0.0939522093665595	0.0375185200963668	2.50415552439814	0.0123250295145413	0.0204172612244385	0.167487157508681
citations	Cell Rep	any_affil_nature_indexTRUE	0.0632509163358114	0.0441129241076028	1.43384093472303	0.151717803875684	-0.0232088261678387	0.149710658839462
citations	Cell Rep	last_author_pub_age	-0.00507567026943029	0.00218783572462432	-2.31995035655698	0.0204077407141369	-0.00936374949378405	-0.000787591045076527
citations	Cell Rep	PC1	0.0437519933607308	0.0114461077695877	3.82243416202841	0.000134719264687109	0.0213180343691749	0.0661859523522868
citations	Cell Rep	PC2	-0.000171605824921716	0.0147112016738824	-0.0116649767113435	0.990693651573074	-0.0290050312750366	0.0286618196251932
citations	Cell Rep	PC3	-0.0126672477860181	0.0159501845579183	-0.794175624740941	0.427153557472184	-0.0439290350663049	0.0185945394942687
citations	Cell Rep	PC4	-0.0414924326857528	0.016320307505687	-2.54238056919542	0.0110579338058714	-0.0734796476135181	-0.00950521775798762
citations	Cell Rep	PC5	-0.0421294983802798	0.0167072594437747	-2.52162830906283	0.0117306837138097	-0.0748751251704449	-0.00938387159011458
citations	Cell Rep	PC6	0.00170952881671351	0.0172067134306837	0.099352431456492	0.920864828698927	-0.0320150097997283	0.0354340674331553
citations	Cell Rep	PC7	-0.0161625000469172	0.0174373210440397	-0.926891235534242	0.354054654727584	-0.0503390212800973	0.0180140211862629
citations	Cell Rep	PC8	-0.0185969148860551	0.0176555843110456	-1.05331630822439	0.2922775596761	-0.053201224261715	0.0160073944896047
citations	Cell Rep	PC9	-0.0405027252003517	0.0179568886990668	-2.25555361394297	0.0241675576170972	-0.075697580324917	-0.00530787007578652
citations	Cell Rep	PC10	-0.027544338846519	0.0181327596152594	-1.51903733524043	0.128854355335544	-0.0630838946327498	0.00799521693971178
citations	Cell Rep	PC11	0.0427880749168133	0.0182789249063431	2.3408419880299	0.0193029295393314	0.00696204042426868	0.0786141094093578
citations	Cell Rep	PC12	-0.0793062751582947	0.018507647479081	-4.28505434026305	1.88215003893212e-05	-0.115580597655857	-0.0430319526607324
citations	Cell Rep	PC13	0.0760331570265401	0.0188143530623295	4.04123154140098	5.44540308072565e-05	0.0391577026319534	0.112908611421127
citations	Cell Rep	PC14	0.0215808362958531	0.0197813974327733	1.09096621556668	0.275371938042386	-0.0171899902362557	0.0603516628279618
citations	Cell Rep	PC15	-0.0497091577414252	0.0200986721811574	-2.47325580980558	0.0134416764893805	-0.0891018313535708	-0.0103164841292797
citations	Development	(Intercept)	3.82272817066166	0.142359884155842	26.8525658989502	2.69378368665144e-128	3.54370792487292	4.1017484164504
citations	Development	preprintTRUE	0.834183377459891	0.235511060344253	3.54201359477785	0.000410212507928758	0.372590181224316	1.29577657369547
citations	Development	preprint_age	-0.54673286849623	0.375017709945686	-1.4578854651302	0.145098006468366	-1.28175407355446	0.188288336562003
citations	Development	ns(pub_date, df = 3)1	-1.08220748555635	0.120782123629539	-8.95999716709465	1.01961672117836e-18	-1.31893609784651	-0.845478873266186
citations	Development	ns(pub_date, df = 3)2	-3.63680083787874	0.256040690230023	-14.2039956016815	7.38509103744196e-43	-4.13863136930636	-3.13497030645111
citations	Development	ns(pub_date, df = 3)3	-2.86700088751881	0.0992566896454179	-28.8847119298539	4.3157864064836e-144	-3.06154042444849	-2.67246135058912
citations	Development	log2(authors)	0.167589429079389	0.0341690017940381	4.90472124674799	1.04579460146125e-06	0.10061941617539	0.234559441983388
citations	Development	log2(references + 1)	0.0615623836943031	0.0185676494560132	3.31557227209317	0.000938139095180421	0.0251704594829526	0.0979543079056536
citations	Development	any_affil_usaTRUE	0.0591482476486488	0.0556352013033689	1.06314430905218	0.287901174581013	-0.04989474317859	0.168191238475888
citations	Development	any_affil_nature_indexTRUE	0.015711996402639	0.0594791111211915	0.264159905998345	0.791695863510593	-0.100864919227352	0.13228891203263
citations	Development	last_author_pub_age	-0.00549620516445062	0.00344039139721377	-1.59755229271349	0.110369938186576	-0.012239248395711	0.0012468380668098
citations	Development	PC1	-0.074500776119823	0.0156835756889283	-4.75024175592919	2.24208967228898e-06	-0.10524001961893	-0.0437615326207156
citations	Development	PC2	0.0408218229596332	0.0171701193053768	2.37749209738164	0.0175654363821887	0.00716900751083881	0.0744746384084276
citations	Development	PC3	0.0938878583796602	0.017502292963036	5.36431761129509	9.50700204408763e-08	0.0595839945252408	0.12819172223408
citations	Development	PC4	0.00528353540166041	0.0195768778982148	0.26988651761179	0.787287620917052	-0.0330864402085788	0.0436535110118996
citations	Development	PC5	0.0458447521437604	0.0198857560673284	2.30540654268015	0.0212904790150329	0.00686938644644793	0.0848201178410728
citations	Development	PC6	-0.00634367327525834	0.0209284276103021	-0.303112751391588	0.761849294448495	-0.047362637644504	0.0346752910939873
citations	Development	PC7	0.0307803408331911	0.0212776734747249	1.44660274393975	0.148233673062097	-0.010923132852073	0.0724838145184552
citations	Development	PC8	0.039578915071808	0.0221025638469853	1.79069339402481	0.0735600506237535	-0.00374131403428017	0.0828991441778962
citations	Development	PC9	-0.027904904912737	0.0226213800841909	-1.2335633285362	0.217574212116373	-0.0722419951583427	0.0164321853328687
citations	Development	PC10	-0.00336907108016377	0.0234616760818759	-0.143598908637494	0.885838016882064	-0.0493531112175853	0.0426149690572578
citations	Development	PC11	0.00974638404024387	0.0238392450242357	0.408837781160242	0.682721691490099	-0.0369776776258838	0.0564704457063715
citations	Development	PC12	-0.0204347881332513	0.0242300001654749	-0.84336723044553	0.399168197877964	-0.0679247158029818	0.0270551395364791
citations	Development	PC13	-0.0065281920391951	0.0248624163860315	-0.262572709660789	0.792918846384339	-0.0552576327244554	0.0422012486460652
citations	Development	PC14	0.0190820518360116	0.0250344647395268	0.762231269354166	0.446051304184369	-0.0299845974256988	0.068148701097722
citations	Development	PC15	-0.0223304646332302	0.0256151787031687	-0.871766888374969	0.383486109748753	-0.0725352923489982	0.0278743630825379
citations	Elife	(Intercept)	1.97716998930601	0.171047425950363	11.5591917172713	1.81440397035469e-30	1.64192319479501	2.312416783817
citations	Elife	preprintTRUE	0.415120172170853	0.08008625205994	5.18341365082435	2.27597542903856e-07	0.258154002476574	0.572086341865132
citations	Elife	preprint_age	-0.0485496140101188	0.143341373458505	-0.338699238319863	0.73485242843284	-0.329493543483295	0.232394315463057
citations	Elife	ns(pub_date, df = 3)1	-1.29152389379825	0.0677884211216929	-19.0522787288367	7.76390754928123e-78	-1.4243867577656	-1.1586610298309
citations	Elife	ns(pub_date, df = 3)2	-3.02430417699158	0.158812891397582	-19.0431907030793	9.11461843631997e-78	-3.33557172441151	-2.71303662957165
citations	Elife	ns(pub_date, df = 3)3	-2.94042117109904	0.0591113228562389	-49.7437889903135	0	-3.05627723497579	-2.8245651072223
citations	Elife	log2(authors)	0.16787353754683	0.0185862372422371	9.03214218988545	2.46547519321594e-19	0.131445181943928	0.204301893149731
citations	Elife	log2(references + 1)	0.385023452213817	0.0277299817792871	13.8847351317559	6.19642745325804e-43	0.330673686634463	0.439373217793172
citations	Elife	any_affil_usaTRUE	0.0698597493595013	0.0346553697430385	2.01584198574406	0.0438769953778486	0.00193647279222664	0.137783025926776
citations	Elife	any_affil_nature_indexTRUE	0.155163103247747	0.0406318861886069	3.81875216246433	0.000135969714774754	0.075526069694147	0.234800136801347
citations	Elife	last_author_pub_age	0.00127991636579941	0.00193451549779978	0.661621148683026	0.508248593617616	-0.00251166433742274	0.00507149706902156
citations	Elife	PC1	-0.077832494546985	0.0110014023570448	-7.07477938002556	1.73294993245014e-12	-0.0993948469462268	-0.0562701421477432
citations	Elife	PC2	0.0383105141585972	0.0134641269495832	2.84537677801553	0.00445633625053854	0.011921310254139	0.0646997180630555
citations	Elife	PC3	0.00950238810490608	0.0139940324854784	0.679031445351205	0.497153547701477	-0.017925411565115	0.0369301877749272
citations	Elife	PC4	-0.0791711347986944	0.0154462117054812	-5.12560207695456	3.09270480855726e-07	-0.109445153439019	-0.0488971161583702
citations	Elife	PC5	-0.00209308774981071	0.0156213074976034	-0.133989280355171	0.893417160919938	-0.0327102878365389	0.0285241123369175
citations	Elife	PC6	-0.00687270127972107	0.0164446880261291	-0.4179283467586	0.676019840252521	-0.0391036975479311	0.025358294988489
citations	Elife	PC7	-0.00238381407896783	0.0170057177427609	-0.140177210690362	0.888526374619811	-0.0357144083860331	0.0309467802280974
citations	Elife	PC8	0.00228688847934321	0.0172312976761399	0.132717136127818	0.894423140968535	-0.0314858343727796	0.036059611331466
citations	Elife	PC9	-0.0101039005034118	0.0175191439991142	-0.57673482813559	0.5641480172056	-0.0444407917816466	0.0242329907748231
citations	Elife	PC10	-0.0267098582215788	0.0184012217253446	-1.45152635081781	0.146704433297712	-0.0627755900747901	0.00935587363163258
citations	Elife	PC11	0.00688729857119998	0.0204753704847766	0.336369912149852	0.736607928679048	-0.0332436901490765	0.0470182872914765
citations	Elife	PC12	-0.0251250134176192	0.0250548958408026	-1.0027985579051	0.316013046246656	-0.0742317069019946	0.0239816800667562
citations	Elife	PC13	-0.0749384901595019	0.0267860541981052	-2.79766813003771	0.00516961227561146	-0.127438191675726	-0.0224387886432777
citations	Evolution	(Intercept)	2.43566181877674	0.388494340067734	6.26949112914252	6.01946976212715e-10	1.67422690404632	3.19709673350715
citations	Evolution	preprintTRUE	0.477015042025597	0.237936672744527	2.00479832101278	0.0453328832152702	0.0106677328450298	0.943362351206163
citations	Evolution	preprint_age	-0.472347941205915	0.383351383650334	-1.23215400113635	0.218266217671299	-1.22370284658417	0.279006964172338
citations	Evolution	ns(pub_date, df = 3)1	-0.956027726139746	0.148683781831307	-6.42993952914403	2.23404077393448e-10	-1.24744258361432	-0.664612868665174
citations	Evolution	ns(pub_date, df = 3)2	-3.13827581133028	0.292529513046866	-10.7280656185535	3.98309034751703e-25	-3.71162312131718	-2.56492850134338
citations	Evolution	ns(pub_date, df = 3)3	-2.4074125098373	0.141062201366912	-17.0663188757098	1.16188161044968e-55	-2.68388934409638	-2.13093567557822
citations	Evolution	log2(authors)	0.0218169970546365	0.0451714737451618	0.482981741479561	0.629245457673906	-0.0667174646144772	0.11035145872375
citations	Evolution	log2(references + 1)	0.295533801235523	0.0596218335078228	4.95680497978558	8.81076328827959e-07	0.178677154867946	0.412390447603099
citations	Evolution	any_affil_usaTRUE	0.0273979983839233	0.070680708686972	0.387630499083739	0.698396205534022	-0.111133645044309	0.165929641812156
citations	Evolution	any_affil_nature_indexTRUE	0.0274709029876693	0.0710901408638861	0.386423527283016	0.699289369753205	-0.111863212761427	0.166805018736765
citations	Evolution	last_author_pub_age	0.00137756403766031	0.00489884036943493	0.281202066973905	0.778630672597545	-0.00822398665244305	0.0109791147277637
citations	Evolution	PC1	-0.065753462444294	0.0239276108070323	-2.74801621334333	0.00613543162894414	-0.112650717862169	-0.0188562070264193
citations	Evolution	PC2	0.00365959500270119	0.0256588227636875	0.142625210688944	0.886623352486641	-0.0466307734998227	0.0539499635052251
citations	Evolution	PC3	0.0657734348353001	0.0270452637388894	2.4319760927575	0.0152427769425253	0.0127656919546899	0.11878117771591
citations	Evolution	PC4	0.0683596339375923	0.0296361090372246	2.30663323082422	0.0213388579035771	0.0102739275827301	0.126445340292455
citations	Evolution	PC5	0.0367000779373039	0.0298720894044989	1.22857418643694	0.219605401839185	-0.0218481414384745	0.0952482973130823
citations	Evolution	PC6	0.0181317039991362	0.0317883570318187	0.570388207889676	0.568580177828992	-0.0441723309109289	0.0804357389092015
citations	Evolution	PC7	0.00470335387711422	0.0323934935838742	0.145194400379698	0.884595236567902	-0.0587867268807085	0.068193434634937
citations	Evolution	PC8	-0.015904397759721	0.0334826000920393	-0.475004859718238	0.634917686404689	-0.0815290880488755	0.0497202925294335
citations	Evolution	PC9	-0.037705186266432	0.0335735957386118	-1.12306070996943	0.261760390303939	-0.103508224745619	0.0280978522127546
citations	Evolution	PC10	0.0343729777013819	0.0345167565859749	0.995834519265017	0.319642176058348	-0.0332786220702646	0.102024577473028
citations	Evolution	PC11	-0.0260863469332163	0.0350183345618669	-0.744933968436721	0.456538059416989	-0.0947210214730497	0.0425483276066171
citations	Evolution	PC12	0.0276283601382122	0.0358108581422085	0.771507904906864	0.440641713061902	-0.0425596320759894	0.0978163523524139
citations	Evolution	PC13	-0.0203658823230554	0.0368466212544531	-0.552720483715832	0.580614616083859	-0.0925839329337716	0.0518521682876608
citations	Evolution	PC14	0.0428231416597022	0.0379204497195442	1.12928886593956	0.259126317863171	-0.0314995740681664	0.117145857387571
citations	Evolution	PC15	0.0514035555131458	0.038157993608885	1.34712417115078	0.178335008465201	-0.0233847376825784	0.12619184870887
citations	G3 (Bethesda)	(Intercept)	2.60438633878526	0.243510684657658	10.6951624831028	1.38344864489857e-25	2.12711416700556	3.08165851056496
citations	G3 (Bethesda)	preprintTRUE	0.52842010643886	0.123229143101113	4.28810988327068	1.94344917370903e-05	0.286895424114946	0.769944788762773
citations	G3 (Bethesda)	preprint_age	-0.370693132454174	0.23250065254779	-1.59437458945617	0.11110990437434	-0.826386037829903	0.0849997729215545
citations	G3 (Bethesda)	ns(pub_date, df = 3)1	-1.00101561868921	0.134236845229987	-7.45708539987045	1.66774116614884e-13	-1.26411500073826	-0.737916236640155
citations	G3 (Bethesda)	ns(pub_date, df = 3)2	-2.87060235862813	0.291971820347695	-9.83177881759159	5.21726774489259e-22	-3.44285661101021	-2.29834810624604
citations	G3 (Bethesda)	ns(pub_date, df = 3)3	-2.29908660202395	0.120868587570653	-19.0213739420099	6.79648390419336e-71	-2.53598468052466	-2.06218852352325
citations	G3 (Bethesda)	log2(authors)	0.154732404377238	0.035099422266422	4.40840316979413	1.13253003280451e-05	0.0859388008568871	0.223526007897588
citations	G3 (Bethesda)	log2(references + 1)	0.0581725313461666	0.0338789536009733	1.71706989629382	0.0862189607637254	-0.00822899754564473	0.124574060237978
citations	G3 (Bethesda)	any_affil_usaTRUE	0.0148553370662348	0.064959684437036	0.228685486928955	0.819151514221365	-0.112463304877443	0.142173979009912
citations	G3 (Bethesda)	any_affil_nature_indexTRUE	0.240136965014932	0.0650493424510813	3.69161248932717	0.000232626430737423	0.1126425965928	0.367631333437064
citations	G3 (Bethesda)	last_author_pub_age	-0.000870100689326342	0.00379927698916738	-0.229017439846371	0.818893557821976	-0.00831654675538618	0.00657634537673349
citations	G3 (Bethesda)	PC1	0.117893674267085	0.0163332535613708	7.21801530993868	9.22530989232055e-13	0.0858810855364375	0.149906262997732
citations	G3 (Bethesda)	PC2	-0.0513972009970609	0.0186613440186556	-2.75420682163511	0.00597044160857332	-0.0879727631767378	-0.014821638817384
citations	G3 (Bethesda)	PC3	-0.0315513418100561	0.0188300454481786	-1.67558500572329	0.0940744980974919	-0.0684575527157384	0.00535486909562628
citations	G3 (Bethesda)	PC4	0.0118603635345245	0.0215598605080512	0.550113185105972	0.582341948704517	-0.0303961865729632	0.0541169136420122
citations	G3 (Bethesda)	PC5	-0.0372256391103204	0.0225215816424015	-1.65288742599834	0.0986098084029364	-0.0813671280043057	0.00691584978366492
citations	G3 (Bethesda)	PC6	-0.0734346160813389	0.0228586845307095	-3.21254777293431	0.00134985342330852	-0.118236814495492	-0.0286324176671854
citations	G3 (Bethesda)	PC7	0.0198641750763037	0.0253810142393474	0.782639136835946	0.433990191146666	-0.0298816987239155	0.0696100488765228
citations	G3 (Bethesda)	PC8	0.0123075837415243	0.0260038241344255	0.473298991636801	0.636084139936435	-0.0386589750222631	0.0632741425053118
citations	G3 (Bethesda)	PC9	0.0739297927332384	0.0266541907669938	2.77366487617349	0.00562693737222077	0.0216885387928705	0.126171046673606
citations	G3 (Bethesda)	PC10	0.0372900374756778	0.0272138663543824	1.37025871260196	0.170857008666647	-0.0160481604589979	0.0906282354103536
citations	G3 (Bethesda)	PC11	0.0529226338016477	0.0283275810504035	1.86823695632473	0.0619674233183462	-0.00259840482628234	0.108443672429578
citations	G3 (Bethesda)	PC12	0.0144690128688048	0.0285124735948402	0.507462560927131	0.611921570335373	-0.0414144084872313	0.070352434224841
citations	G3 (Bethesda)	PC13	0.00339284891833461	0.0292111268990989	0.116149196504955	0.907553321244432	-0.0538599077517285	0.0606456055883977
citations	G3 (Bethesda)	PC14	-0.0299889336308215	0.0297962894081202	-1.00646537627765	0.31439035607663	-0.0883885877436693	0.0284107204820264
citations	G3 (Bethesda)	PC15	0.00960473684823629	0.02987906117768	0.321453769618811	0.747921334498546	-0.0489571469518853	0.0681666206483579
citations	Genetics	(Intercept)	1.59358770747803	0.350352006596995	4.54853312517519	5.96087302656504e-06	0.906910392636579	2.28026502231948
citations	Genetics	preprintTRUE	0.376873025771354	0.13074533991007	2.88249681426946	0.00401706802452591	0.12061686840117	0.633129183141539
citations	Genetics	preprint_age	0.291131642357842	0.234479838905653	1.24160628784372	0.214629227951267	-0.168440396997993	0.750703681713676
citations	Genetics	ns(pub_date, df = 3)1	-1.25694458758307	0.14484237474991	-8.67801698055111	1.31902983405031e-17	-1.54083042552814	-0.973058749637989
citations	Genetics	ns(pub_date, df = 3)2	-3.15518021325593	0.313614038397942	-10.0607110235682	6.72847978220403e-23	-3.76985243356206	-2.5405079929498
citations	Genetics	ns(pub_date, df = 3)3	-2.49913950281753	0.128642379876836	-19.4270310080569	3.87592071763739e-73	-2.75127393426165	-2.24700507137341
citations	Genetics	log2(authors)	0.14737254088097	0.0409553180265247	3.59837373953546	0.000333512769697275	0.0671015925735973	0.227643489188342
citations	Genetics	log2(references + 1)	0.321564155505885	0.0563052977729391	5.71108169612473	1.42051660777337e-08	0.211207799732121	0.431920511279649
citations	Genetics	any_affil_usaTRUE	0.0469162304650903	0.0734632462460863	0.638635411072509	0.523184385913994	-0.0970690863646361	0.190901547294817
citations	Genetics	any_affil_nature_indexTRUE	0.316733548366928	0.0739558213120159	4.28273992158974	1.99643330310502e-05	0.171782802148297	0.461684294585559
citations	Genetics	last_author_pub_age	0.00145213202864612	0.00415725158691578	0.349300974041709	0.72692584933058	-0.00669593135638079	0.00960019541367303
citations	Genetics	PC1	-0.125677043857545	0.0190369936466675	-6.60172746759023	6.13442672886426e-11	-0.162988865778931	-0.0883652219361593
citations	Genetics	PC2	0.0586819283401074	0.020885545047661	2.80969101865403	0.00504101071292137	0.0177470122492029	0.0996168444310118
citations	Genetics	PC3	0.0191094807269367	0.0237525299527796	0.804524013438849	0.421256877682224	-0.0274446225222201	0.0656635839760936
citations	Genetics	PC4	-0.00554808158675554	0.027435524593188	-0.202222544275063	0.839777696597833	-0.0593207216863669	0.0482245585128558
citations	Genetics	PC5	0.0760334292433644	0.0274897980302189	2.76587805991817	0.00576576170425328	0.0221544151618552	0.129912443324874
citations	Genetics	PC6	-0.0391712595201874	0.0294773965151707	-1.32885750273189	0.184152538847921	-0.0969458950479284	0.0186033760075536
citations	Genetics	PC7	0.0130673028486202	0.0305711622110791	0.427438864064009	0.66913789085895	-0.0468510740506267	0.0729856797478671
citations	Genetics	PC8	-0.0362120059067052	0.0315543317529736	-1.14760807454883	0.251363601885235	-0.0980573596987621	0.0256333478853517
citations	Genetics	PC9	-0.0154701801249824	0.0319155158791753	-0.484722859675803	0.627963141554853	-0.0780234417961822	0.0470830815462175
citations	Genetics	PC10	0.0329177993589971	0.0327881538489802	1.00395403506443	0.315607119368903	-0.0313458013045625	0.0971814000225566
citations	Genetics	PC11	-0.100998209634951	0.0340523396112664	-2.9659697626631	0.00307817068981536	-0.16773956886236	-0.0342568504075424
citations	Genetics	PC12	-0.0861295076548318	0.0346768720078837	-2.4837738431324	0.0131381702642713	-0.154094927886789	-0.0181640874228746
citations	Genetics	PC13	0.0432352382155705	0.0351712718091378	1.22927707733155	0.219213627893011	-0.0256991878208086	0.11216966425195
citations	Genetics	PC14	0.0231907506906137	0.0359348541909674	0.645355357986756	0.518822705618934	-0.0472402693133807	0.0936217706946081
citations	Genetics	PC15	-0.0542837993084237	0.0361456374500431	-1.5018077737168	0.133414981309238	-0.12512794690875	0.016560348291903
citations	Genome Biol	(Intercept)	5.44297279851809	0.478021700822666	11.3864554457483	1.21192241355298e-27	4.50606748107709	6.3798781159591
citations	Genome Biol	preprintTRUE	0.430112710982073	0.189756090229607	2.26666090380357	0.023720142913237	0.0581976082849106	0.802027813679235
citations	Genome Biol	preprint_age	0.130108683164555	0.232381379017793	0.559892895525819	0.575734471153368	-0.325350450388071	0.58556781671718
citations	Genome Biol	ns(pub_date, df = 3)1	-1.21694166208096	0.198918263635514	-6.11779753070239	1.59067132905785e-09	-1.60681429467381	-0.827069029488105
citations	Genome Biol	ns(pub_date, df = 3)2	-3.1306365832383	0.385547540766593	-8.11997549514539	2.15085877307793e-15	-3.88629587746881	-2.37497728900779
citations	Genome Biol	ns(pub_date, df = 3)3	-3.32185613369895	0.154525310250917	-21.4971652754163	7.75072125503413e-79	-3.62472017649062	-3.01899209090727
citations	Genome Biol	log2(authors)	0.244191315275378	0.0438774112878365	5.56530816445573	3.74969181870605e-08	0.158193169416368	0.330189461134389
citations	Genome Biol	log2(references + 1)	-0.0894104562434858	0.079773312808655	-1.12080660932243	0.262760690296779	-0.245763276275897	0.0669423637889257
citations	Genome Biol	any_affil_usaTRUE	-0.0291992218567735	0.0928100354076475	-0.314612764972262	0.753150932393816	-0.21110354865965	0.152705104946103
citations	Genome Biol	any_affil_nature_indexTRUE	-0.0157134976175557	0.107664606688298	-0.145948590729061	0.884004660695577	-0.22673224913629	0.195305253901178
citations	Genome Biol	last_author_pub_age	-0.00614371799472481	0.00642867907897332	-0.955673462503276	0.339572415512501	-0.0187436974576787	0.00645626146822903
citations	Genome Biol	PC1	0.0628189436573863	0.026964819497427	2.32966305090159	0.0201120011327142	0.00996886859280601	0.115669018721967
citations	Genome Biol	PC2	-0.00243340380565709	0.0293129320334639	-0.0830146845385205	0.933863974756493	-0.0598856948725167	0.0550188872612025
citations	Genome Biol	PC3	-0.00653777344312976	0.0285839960488215	-0.228721464695252	0.819153279517211	-0.0625613762330552	0.0494858293467957
citations	Genome Biol	PC4	0.0296898257144609	0.0327467704366926	0.906648970830833	0.364909418192349	-0.0344926649514576	0.0938723163803794
citations	Genome Biol	PC5	0.112520328323246	0.0334391736406814	3.36492550720081	0.0008080902414957	0.046980752314729	0.178059904331762
citations	Genome Biol	PC6	0.0898644473813617	0.0358356737310671	2.50768125794871	0.012381502234906	0.0196278175067421	0.160101077255981
citations	Genome Biol	PC7	0.0137647410377163	0.0371318285050015	0.370699251610036	0.710975487375204	-0.0590123055122045	0.086541787587637
citations	Genome Biol	PC8	-0.00845783479379997	0.0373686401257791	-0.22633509716521	0.821007930950072	-0.0816990235915653	0.0647833540039653
citations	Genome Biol	PC9	0.0446377493312829	0.0380109195708067	1.17434015896752	0.240664528322976	-0.0298622840467469	0.119137782709313
citations	Genome Biol	PC10	-0.0837611981099557	0.0392415290570757	-2.13450393301768	0.0331538516454846	-0.160673181760106	-0.00684921445980531
citations	Genome Biol	PC11	-0.0557146571405509	0.0401913863393945	-1.38623377332821	0.166123957536836	-0.134488326854499	0.0230590125733975
citations	Genome Biol	PC12	-0.033491472171267	0.040727820963313	-0.822324184773735	0.411176901088886	-0.113316534428156	0.0463335900856219
citations	Genome Biol	PC13	-0.131964474443903	0.0421324429510387	-3.13213441236379	0.00180888184519767	-0.214542545208627	-0.0493864036791783
citations	Genome Biol	PC14	0.0639594925704236	0.0422303386356313	1.51453894609452	0.13034779237375	-0.018810450210344	0.146729435351191
citations	Genome Biol	PC15	0.0706690464858434	0.0429619654246427	1.64492117125787	0.100442183783643	-0.0135348584515114	0.154872951423198
citations	Genome Biol Evol	(Intercept)	0.916419294214437	0.346396452221135	2.64557933067226	0.00829141674227864	0.237494723488563	1.59534386494031
citations	Genome Biol Evol	preprintTRUE	0.174794123091442	0.191711579753166	0.911755686936043	0.36213134972609	-0.200953668644041	0.550541914826924
citations	Genome Biol Evol	preprint_age	0.199064118977814	0.252790604619489	0.78746644590472	0.431207582207174	-0.296396361706488	0.694524599662117
citations	Genome Biol Evol	ns(pub_date, df = 3)1	-1.29919751823112	0.140825832822697	-9.22556247096252	1.81670902360003e-19	-1.57521107865646	-1.02318395780577
citations	Genome Biol Evol	ns(pub_date, df = 3)2	-3.5351662424003	0.301560650535124	-11.7229029587484	1.02138111632683e-29	-4.12621425660361	-2.94411822819699
citations	Genome Biol Evol	ns(pub_date, df = 3)3	-2.67215692421984	0.124753047060464	-21.4195724047103	3.44186980073796e-83	-2.91666840341998	-2.4276454450197
citations	Genome Biol Evol	log2(authors)	0.213647296609666	0.0397463192248584	5.37527249758627	9.6506924189036e-08	0.135745942410911	0.29154865080842
citations	Genome Biol Evol	log2(references + 1)	0.475205612355313	0.0525068372413776	9.05035681678483	8.04030549600923e-19	0.372294102420107	0.57811712229052
citations	Genome Biol Evol	any_affil_usaTRUE	-0.196784204304444	0.0809997516003199	-2.42944207132194	0.0153087239907711	-0.355540800197761	-0.0380276084111262
citations	Genome Biol Evol	any_affil_nature_indexTRUE	0.131212420604472	0.0673581710497276	1.9479807506591	0.0517149299726944	-0.000807168717482459	0.263232009926427
citations	Genome Biol Evol	last_author_pub_age	-0.0055310369245371	0.00428252343989023	-1.29153687123283	0.196835397266739	-0.0139246286296705	0.00286255478059633
citations	Genome Biol Evol	PC1	0.0572602133607362	0.024419489972071	2.34485705582818	0.0192418381764084	0.0093988924946401	0.105121534226832
citations	Genome Biol Evol	PC2	0.0239590248716554	0.0258562808044339	0.926623014843915	0.354360397071589	-0.0267183542791894	0.0746364040225002
citations	Genome Biol Evol	PC3	-0.0599162454314287	0.0264351436744189	-2.26653753690052	0.0236452820679074	-0.111728174959432	-0.00810431590342581
citations	Genome Biol Evol	PC4	0.0132145375363681	0.0275998649794504	0.478789934161164	0.632199545476647	-0.040880203801523	0.0673092788742591
citations	Genome Biol Evol	PC5	-0.0417222963696184	0.0285683879492066	-1.46043579511028	0.144504837412441	-0.0977153078464313	0.0142707151071946
citations	Genome Biol Evol	PC6	-0.0137435592720545	0.0304791267202128	-0.450917094778183	0.652153407939022	-0.0734815499239041	0.0459944313797951
citations	Genome Biol Evol	PC7	-0.020863240988799	0.0310729974562051	-0.671426727279981	0.502113861003895	-0.0817651968946657	0.0400387149170678
citations	Genome Biol Evol	PC8	0.0215791030532213	0.0309288622987745	0.697701158379703	0.485536822825579	-0.0390403531351754	0.082198559241618
citations	Genome Biol Evol	PC9	0.0666333304233111	0.03148804682475	2.11614682848275	0.0345949549301603	0.00491789270329019	0.128348768143332
citations	Genome Biol Evol	PC10	0.00884567554715141	0.0314901888589557	0.280902588001968	0.77884699672859	-0.0528739604827662	0.070565311577069
citations	Genome Biol Evol	PC11	-0.062736583649459	0.0317018729471224	-1.97895511580977	0.0481128536597142	-0.124871112868283	-0.000602054430634526
citations	Genome Biol Evol	PC12	-0.0847707969313022	0.0331837738803596	-2.55458578150074	0.0107882015442625	-0.149809798607928	-0.0197317952546765
citations	Genome Biol Evol	PC13	-0.0744557378876407	0.0335164786073742	-2.22146660333401	0.0265571629653724	-0.140146828846701	-0.00876464692857999
citations	Genome Biol Evol	PC14	-0.0446593660860677	0.0340534591558612	-1.31144873951465	0.190026774035761	-0.111402919580561	0.0220841874084259
citations	Genome Biol Evol	PC15	0.00131664952301754	0.0345932408488826	0.038060889662498	0.969647224247915	-0.0664848566493121	0.0691181556953471
citations	Genome Res	(Intercept)	3.86746172516934	0.596320365777243	6.48554358885345	1.80963109184956e-10	2.6986952849982	5.03622816534049
citations	Genome Res	preprintTRUE	0.52454877634638	0.248090425776314	2.11434510100495	0.0348850005103738	0.0383004769155981	1.01079707577716
citations	Genome Res	preprint_age	-0.0847885072768943	0.338300184476789	-0.250630981499544	0.802182593066637	-0.747844684814657	0.578267670260868
citations	Genome Res	ns(pub_date, df = 3)1	-1.12001111987274	0.195889416013579	-5.71756832331922	1.68188008818689e-08	-1.50394732021194	-0.736074919533544
citations	Genome Res	ns(pub_date, df = 3)2	-3.65650613248452	0.3971844455863	-9.20606577905387	5.15861169185483e-19	-4.43497334105317	-2.87803892391586
citations	Genome Res	ns(pub_date, df = 3)3	-3.18339834668017	0.162575000713456	-19.5811061522985	8.25827788035479e-67	-3.50203949286512	-2.86475720049523
citations	Genome Res	log2(authors)	0.270371556171926	0.0474910697368947	5.6931030964308	1.9277729960858e-08	0.177290769900333	0.36345234244352
citations	Genome Res	log2(references + 1)	0.10506872065018	0.0964374227912352	1.08950154005702	0.276356738881551	-0.0839451547825029	0.294082596082863
citations	Genome Res	any_affil_usaTRUE	0.0673275327072032	0.0956542489455169	0.703863481752409	0.481782479888493	-0.120151350194238	0.254806415608645
citations	Genome Res	any_affil_nature_indexTRUE	0.187120726162485	0.110846956709134	1.68809980641593	0.0918957761887444	-0.0301353167832888	0.404376769108259
citations	Genome Res	last_author_pub_age	-0.000833977797781231	0.00584251165674539	-0.142743026762877	0.886539584736154	-0.0122850902242576	0.0106171346286952
citations	Genome Res	PC1	0.0267138900706145	0.0269572941814535	0.990970751396613	0.32208706746552	-0.0261214356456854	0.0795492157869144
citations	Genome Res	PC2	-0.0237803821232868	0.0299357367173311	-0.794381055252912	0.42727807370066	-0.0824533479399291	0.0348925836933554
citations	Genome Res	PC3	0.0327185618097935	0.0328716852654323	0.995341782619222	0.319958986856895	-0.0317087574215899	0.0971458810411768
citations	Genome Res	PC4	-0.0470224417587667	0.033043589627074	-1.42304278347045	0.155227534653172	-0.111786687347753	0.0177418038302197
citations	Genome Res	PC5	0.0240174181726465	0.0358062023628102	0.670761392936549	0.502622737746465	-0.0461614488816145	0.0941962852269076
citations	Genome Res	PC6	-0.0729976258550989	0.0373033774230502	-1.95686371845764	0.0508126239713209	-0.146110902105982	0.000115650395784067
citations	Genome Res	PC7	-0.0148872614684678	0.0393110861978683	-0.37870389522015	0.705037613642047	-0.0919355746094392	0.0621610516725036
citations	Genome Res	PC8	0.0235640989652332	0.0404443939212227	0.582629548390098	0.560354877908542	-0.055705456496914	0.10283365442738
citations	Genome Res	PC9	0.15583272669337	0.0410897300534026	3.79249818606354	0.000163757875827887	0.075298335654228	0.236367117732512
citations	Genome Res	PC10	-0.0774529406178189	0.0414691665360331	-1.86772359050233	0.0622729309466487	-0.158731013497337	0.00382513226169959
citations	Genome Res	PC11	0.0307850389449116	0.0429711473735724	0.716411844377343	0.47400727785896	-0.0534368622816532	0.115006940171476
citations	Genome Res	PC12	-0.079829047921919	0.0440254669797411	-1.81324704536702	0.0702779149516925	-0.166117377604769	0.006459281760931
citations	Genome Res	PC13	0.10181707833569	0.0441376637078009	2.30680715249763	0.0213948220970746	0.0153088471066598	0.18832530956472
citations	Genome Res	PC14	0.0139195361540173	0.0446731025638845	0.311586510789389	0.755459700735776	-0.0736381359488603	0.101477208256895
citations	Genome Res	PC15	0.0861046856713072	0.0463096997187049	1.85932291062835	0.0634556551865478	-0.00466065791221905	0.176870029254833
citations	Gigascience	(Intercept)	1.90000416278795	0.462570857526829	4.1074878191559	5.03901022129998e-05	0.993381941737555	2.80662638383834
citations	Gigascience	preprintTRUE	0.105248538971981	0.268353462611279	0.392201158680176	0.69516048542804	-0.420714582872742	0.631211660816703
citations	Gigascience	preprint_age	0.394823996161654	0.337249919083133	1.17071635549994	0.242549902558383	-0.266173699030334	1.05582169135364
citations	Gigascience	ns(pub_date, df = 3)1	-1.58824288776937	0.263064616272165	-6.03746300158507	4.17774624954328e-09	-2.10384006126966	-1.07264571426908
citations	Gigascience	ns(pub_date, df = 3)2	-4.08284618673798	0.711897329122697	-5.73516154607499	2.18751628662182e-08	-5.47813931250872	-2.68755306096724
citations	Gigascience	ns(pub_date, df = 3)3	-2.4598922442361	0.253754044434319	-9.69400211815272	9.76768783718141e-20	-2.95724103225874	-1.96254345621346
citations	Gigascience	log2(authors)	0.284595767518744	0.0631948395708979	4.50346530588875	9.26058827305471e-06	0.160736157950998	0.40845537708649
citations	Gigascience	log2(references + 1)	0.310606139366147	0.0788583753246435	3.93878441050106	9.97825209754017e-05	0.156046563850504	0.46516571488179
citations	Gigascience	any_affil_usaTRUE	0.0760319917157724	0.13854539661558	0.548787571244515	0.583519000148141	-0.195511995874582	0.347575979306127
citations	Gigascience	any_affil_nature_indexTRUE	0.225485707670231	0.136858793787417	1.64757924156835	0.100382264736782	-0.0427525991206994	0.493724014461162
citations	Gigascience	last_author_pub_age	-0.00186235184152867	0.0124865377200533	-0.149148777930471	0.881526521738713	-0.026335516064434	0.0226108123813767
citations	Gigascience	PC1	-0.00545496698430583	0.0374991506512028	-0.145469081021195	0.884428537376927	-0.0789519517115049	0.0680420177428933
citations	Gigascience	PC2	-0.00561117995488399	0.0478874132179076	-0.117174421791187	0.906792474683432	-0.0994687851747702	0.0882464252650022
citations	Gigascience	PC3	0.0802459853728745	0.04793860977384	1.67393225943454	0.0950828731209682	-0.0137119632527717	0.174203933998521
citations	Gigascience	PC4	0.0447008473949735	0.0486135513637816	0.919514130133617	0.358492302932049	-0.0505799624386264	0.139981657228573
citations	Gigascience	PC5	-0.0777383985295665	0.0532936397360402	-1.45868060268729	0.145595592992884	-0.182192013017258	0.026715215958125
citations	Gigascience	PC6	-0.22190921580224	0.054072490198424	-4.10392077353796	5.11355685637975e-05	-0.327889349145546	-0.115929082458934
citations	Gigascience	PC7	-0.0162220637167796	0.0554693348446595	-0.292451022933826	0.770123932438527	-0.124939962258705	0.0924958348251457
citations	Gigascience	PC8	0.101623820579491	0.0581893116342501	1.7464344864268	0.0816575462876306	-0.0124251345088171	0.215672775667798
citations	Gigascience	PC9	0.0116382818470467	0.0584808835748948	0.199010020635922	0.842376359721803	-0.102982143743827	0.126258707437921
citations	Gigascience	PC10	0.0865616824298779	0.0641018964382445	1.35037631083616	0.1778123237636	-0.0390757259297977	0.212199090789554
citations	Gigascience	PC11	-0.00088764324543362	0.0627671640648023	-0.0141418408599311	0.988725288401046	-0.123909024224163	0.122133737733295
citations	Gigascience	PC12	-0.0241527634731711	0.0647669985728141	-0.372917751407261	0.709446915841423	-0.151093748062644	0.102788221116302
citations	Gigascience	PC13	0.0422686318670993	0.0657170929595233	0.643190834584445	0.520542934833566	-0.086534503502237	0.171071767236436
citations	Gigascience	PC14	0.0731364986170676	0.0698197151471348	1.04750496994929	0.295626439775386	-0.0637076284821622	0.209980625716297
citations	Gigascience	PC15	-0.0902930360921109	0.0718096109137058	-1.25739486599665	0.209491807343868	-0.231037287226809	0.0504512150425868
citations	ISME J	(Intercept)	3.31386692523466	0.374172928917997	8.85651170654551	4.52844979103005e-18	2.58050146056552	4.0472323899038
citations	ISME J	preprintTRUE	0.243349745480231	0.330403856121413	0.736522110658441	0.461610431850088	-0.404229912870892	0.890929403831354
citations	ISME J	preprint_age	-0.0928955981102447	0.491966397276574	-0.188825087698054	0.850273694945553	-1.05713201837625	0.871340822155764
citations	ISME J	ns(pub_date, df = 3)1	-1.01458870655698	0.15050868358584	-6.74106425213881	2.85178316884894e-11	-1.30958030574576	-0.719597107368197
citations	ISME J	ns(pub_date, df = 3)2	-3.11600375523218	0.305098706179986	-10.2131005216193	3.26960286414228e-23	-3.71398623107472	-2.51802127938964
citations	ISME J	ns(pub_date, df = 3)3	-3.3191560318054	0.121602660332069	-27.295093896314	3.64766151155088e-119	-3.55749286648052	-3.08081919713029
citations	ISME J	log2(authors)	0.144351609013398	0.0452884411743568	3.18738303351303	0.00148662540661629	0.0555878953956978	0.233115322631098
citations	ISME J	log2(references + 1)	0.23633420001281	0.0586140339991564	4.032041200512	6.01162834077699e-05	0.121452804385857	0.351215595639762
citations	ISME J	any_affil_usaTRUE	0.180071229583233	0.0705900347219716	2.55094405736543	0.0109123448476242	0.0417173038607369	0.318425155305729
citations	ISME J	any_affil_nature_indexTRUE	-0.0305676110663325	0.0733458861397284	-0.416759721303242	0.676956383672329	-0.174322906314376	0.113187684181711
citations	ISME J	last_author_pub_age	-0.00487816652694241	0.00495479444612909	-0.984534591692992	0.325124883770436	-0.0145893851921545	0.00483305213826969
citations	ISME J	PC1	0.0588573727325807	0.0217913230606795	2.70095452986898	0.00704772631689612	0.0161471643581717	0.10156758110699
citations	ISME J	PC2	0.0144990997568969	0.0228546754626135	0.634404097341701	0.525982960670672	-0.0302952410281769	0.0592934405419706
citations	ISME J	PC3	-0.158491748654334	0.0247534117653853	-6.40282439271528	2.4856693472606e-10	-0.207007544208979	-0.109975953099689
citations	ISME J	PC4	0.0178513611802243	0.0261895644326785	0.681621155865805	0.495658900500644	-0.0334792418786167	0.0691819642390653
citations	ISME J	PC5	0.0561359444673571	0.0271562742059156	2.06714455899583	0.0390141226989175	0.00291062506946856	0.109361263865246
citations	ISME J	PC6	0.0130043364673282	0.0298143603924565	0.436176939439509	0.662815951883506	-0.045430736123984	0.0714394090586404
citations	ISME J	PC7	0.00347014218271232	0.0297587909640762	0.116608977390962	0.907196681367831	-0.054856016330333	0.0617963006957577
citations	ISME J	PC8	0.00971292724644867	0.0319561679011469	0.303945306474	0.761241822848251	-0.0529200109237141	0.0723458654166114
citations	ISME J	PC9	0.015737401982845	0.0320664669900155	0.490774427620765	0.623709053451599	-0.0471117184290278	0.0785865223947178
citations	ISME J	PC10	0.0236119138730373	0.0326918321813324	0.722257282555123	0.470329288982714	-0.0404628997910018	0.0876867275370764
citations	ISME J	PC11	0.0456114524844444	0.0336320319419724	1.35619080533525	0.175388317456943	-0.020306118848722	0.111529023817611
citations	ISME J	PC12	-0.0683331151620602	0.0339951539103572	-2.01008400615716	0.0447287991310859	-0.134962392475256	-0.0017038378488641
citations	ISME J	PC13	-0.00943789292246639	0.0342465846516445	-0.275586398423914	0.782930825132261	-0.0765599654331918	0.057684179588259
citations	ISME J	PC14	0.0180084157417896	0.0352839134359244	0.510386008470771	0.609909783784496	-0.051146783826251	0.0871636153098303
citations	ISME J	PC15	-0.0294048246912749	0.0359870647616152	-0.817094277792806	0.414096967834196	-0.0999381755333511	0.0411285261508013
citations	J Biol Chem	(Intercept)	1.99815969213736	0.137245073563663	14.5590631434249	2.22412533676361e-47	1.72916429089704	2.26715509337769
citations	J Biol Chem	preprintTRUE	0.326116952374	0.193813464297425	1.68263311094601	0.0924873553846498	-0.0537504573678924	0.705984362115893
citations	J Biol Chem	preprint_age	-0.288894283246887	0.434098362036888	-0.665504200226257	0.505748323418588	-1.13971143858702	0.561922872093243
citations	J Biol Chem	ns(pub_date, df = 3)1	-0.749630249586904	0.0524098074345173	-14.3032437301648	8.22216170630214e-46	-0.852351584595237	-0.64690891457857
citations	J Biol Chem	ns(pub_date, df = 3)2	-2.69137149964587	0.094674271848244	-28.4276968505228	5.37922334187577e-169	-2.87692966273098	-2.50581333656075
citations	J Biol Chem	ns(pub_date, df = 3)3	-2.66972494437851	0.0416842653629464	-64.0463474918683	0	-2.7514246032119	-2.58802528554513
citations	J Biol Chem	log2(authors)	0.154725095533582	0.0153356673193322	10.0892313527521	8.71043003498053e-24	0.124667739908803	0.184782451158361
citations	J Biol Chem	log2(references + 1)	0.259244111244819	0.0230074246218212	11.2678457283281	3.22783903328136e-29	0.214150387609029	0.304337834880608
citations	J Biol Chem	any_affil_usaTRUE	0.0842554287579368	0.0231861492321347	3.63386899283661	0.00028105142533883	0.0388114113227818	0.129699446193092
citations	J Biol Chem	any_affil_nature_indexTRUE	0.0638122886412058	0.0234622661799117	2.7197836795425	0.00654736276347663	0.0178270919328867	0.109797485349525
citations	J Biol Chem	last_author_pub_age	-0.000237322179787226	0.00129961376781702	-0.182609776584515	0.855109100114265	-0.00278451835852098	0.00230987399894653
citations	J Biol Chem	PC1	-0.0383508663162535	0.00626001928886382	-6.12631759529516	9.44327165397448e-10	-0.0506202786649526	-0.0260814539675544
citations	J Biol Chem	PC2	0.0162340900318064	0.00813826556301927	1.99478499516838	0.0461021086852175	0.000283382631666038	0.0321847974319467
citations	J Biol Chem	PC3	0.00118019515606929	0.00869013464097513	0.135808615726678	0.891976188972783	-0.0158521557610459	0.0182125460731845
citations	J Biol Chem	PC4	0.0114408213001661	0.00949101213605774	1.20543743239994	0.228072136770035	-0.00716122066333962	0.0300428632636718
citations	J Biol Chem	PC5	-0.00803524916644497	0.0104854326232522	-0.766325001090199	0.443506828486254	-0.0285863194703407	0.0125158211374507
citations	J Biol Chem	PC6	0.00248660455396895	0.0104197252378963	0.238643965862481	0.811388126419791	-0.0179356816411108	0.0229088907490487
citations	J Biol Chem	PC7	0.0141989757438679	0.0105477397051597	1.3461628880472	0.178290278510441	-0.00647421419654821	0.034872165684284
citations	J Biol Chem	PC8	0.0371145288403011	0.0107087429639205	3.46581563917876	0.0005315572704688	0.0161257783113203	0.0581032793692819
citations	J Biol Chem	PC9	-0.00372779793793749	0.0107573926921405	-0.346533592722805	0.728951369391576	-0.0248119001820872	0.0173563043062122
citations	J Biol Chem	PC10	-0.00100858327848105	0.0110135709781261	-0.0915764088218241	0.927037017499084	-0.0225947857367838	0.0205776191798217
citations	J Biol Chem	PC11	0.0379463915429018	0.0110780975058891	3.42535273071298	0.000617260905814385	0.0162337194141362	0.0596590636716674
citations	J Biol Chem	PC12	-0.0422891719490001	0.0113477256793596	-3.72666498503043	0.000195442702087636	-0.0645303055869853	-0.0200480383110149
citations	J Biol Chem	PC13	-0.0399090145805626	0.011386109167604	-3.50506164951524	0.000459141976773324	-0.0622253784731077	-0.0175926506880175
citations	J Biol Chem	PC14	-0.0284007004317028	0.0115066437473629	-2.46820020287948	0.0136013613216693	-0.050953307759467	-0.00584809310393864
citations	J Biol Chem	PC15	0.00274483226625512	0.0118207647535133	0.232204288258026	0.816385620823579	-0.0204234409203514	0.0259131054528617
citations	J Cell Biol	(Intercept)	3.76666968446382	0.43317647184237	8.69546230995318	1.6398221671637e-17	2.91765940070265	4.615679968225
citations	J Cell Biol	preprintTRUE	0.790382573938256	0.217367481666507	3.63615830610252	0.00029258602242671	0.364350138461733	1.21641500941478
citations	J Cell Biol	preprint_age	-0.503330621005554	0.381445549173772	-1.31953465467297	0.18732900761087	-1.25095015944925	0.244288917438141
citations	J Cell Biol	ns(pub_date, df = 3)1	-1.02006497803438	0.142329541150903	-7.16692381487323	1.607589104101e-12	-1.29902575262626	-0.741104203442503
citations	J Cell Biol	ns(pub_date, df = 3)2	-2.31831912007641	0.303269788908057	-7.64441169172726	5.42053180870294e-14	-2.91271698393527	-1.72392125621755
citations	J Cell Biol	ns(pub_date, df = 3)3	-2.53864644707779	0.127121995649486	-19.9701588549445	1.2564594213051e-73	-2.78780098019364	-2.28949191396194
citations	J Cell Biol	log2(authors)	0.0745699380814752	0.0420057204144127	1.7752329288915	0.0762003673234925	-0.00775976107543257	0.156899637238383
citations	J Cell Biol	log2(references + 1)	0.112578746698358	0.0697008475211583	1.61517041330356	0.106627423531042	-0.0240324041350302	0.249189897531746
citations	J Cell Biol	any_affil_usaTRUE	0.135362796006447	0.0688643330296966	1.96564447880552	0.0496495624782842	0.000391183448870097	0.270334408564025
citations	J Cell Biol	any_affil_nature_indexTRUE	0.16737370788228	0.074282109230954	2.25321695378749	0.0244876673328593	0.0217834490939399	0.31296396667062
citations	J Cell Biol	last_author_pub_age	0.00522986760570076	0.00380758241659007	1.37354022408383	0.169929570511102	-0.00223285679898375	0.0126925920103853
citations	J Cell Biol	PC1	-0.0114284104834687	0.018122840212295	-0.630608135898886	0.528458303081848	-0.0469485245971412	0.0240917036302037
citations	J Cell Biol	PC2	0.0651969814344884	0.0190730161778119	3.4182837589334	0.000658704343283094	0.0278145566494273	0.102579406219549
citations	J Cell Biol	PC3	0.00325084871316947	0.018970800263575	0.171360652582026	0.863979056632716	-0.0339312365613405	0.0404329339876794
citations	J Cell Biol	PC4	0.138557887021482	0.0199205163848225	6.95553691203757	6.7910960390475e-12	0.0995143923537898	0.177601381689174
citations	J Cell Biol	PC5	0.065722029511535	0.0231479251749056	2.83921902351678	0.00462517221491043	0.020352929851892	0.111091129171178
citations	J Cell Biol	PC6	0.0269218522312074	0.0239306391777444	1.12499511739932	0.260893723337735	-0.0199813386841949	0.0738250431466097
citations	J Cell Biol	PC7	0.0242020892667131	0.0255223028759599	0.948272159621992	0.343247748537059	-0.0258207051726914	0.0742248837061175
citations	J Cell Biol	PC8	-0.0760970633015539	0.026795834165073	-2.83988409663852	0.00461562822485941	-0.128615933200805	-0.023578193402303
citations	J Cell Biol	PC9	0.000781881045994611	0.0274774200621669	0.0284554024441023	0.977305302250649	-0.0530728726639309	0.0546366347559201
citations	J Cell Biol	PC10	0.0554315191734878	0.0282291260466391	1.96362859699964	0.0498834515737572	0.000103448807033633	0.110759589539942
citations	J Cell Biol	PC11	-0.0254585778047132	0.0290620189831529	-0.876008573921564	0.381261208174731	-0.0824190883297123	0.0315019327202859
citations	J Cell Biol	PC12	0.0146389169083242	0.0292764744257584	0.500023216437714	0.617182056588951	-0.0427419185604702	0.0720197523771185
citations	J Cell Biol	PC13	-0.0956009462444021	0.0294576901554489	-3.24536464807369	0.0012166849090151	-0.153336958016822	-0.0378649344719822
citations	J Cell Biol	PC14	0.0630157200662031	0.0301756236611438	2.08829884591073	0.0370539713728611	0.00387258447932664	0.12215885565308
citations	J Cell Biol	PC15	0.0105827668357584	0.030727614860377	0.344405736789055	0.730622353904038	-0.0496422516213982	0.0708077852929151
citations	J Neurophysiol	(Intercept)	1.00458528355127	0.256729740026479	3.91300705343936	9.47003306547049e-05	0.501404239339036	1.5077663277635
citations	J Neurophysiol	preprintTRUE	0.898734879493328	0.264846169910125	3.39342222618629	0.000705898060869887	0.379645925026108	1.41782383396055
citations	J Neurophysiol	preprint_age	-1.03687180490905	0.536377317059553	-1.93310151628566	0.053387458959953	-2.08815202847	0.0144084186518905
citations	J Neurophysiol	ns(pub_date, df = 3)1	-0.874080850848205	0.109347389256564	-7.99361426725364	2.37954512387061e-15	-1.08839779559455	-0.659763906101858
citations	J Neurophysiol	ns(pub_date, df = 3)2	-2.44866501685275	0.202653708479541	-12.0830012696262	2.53350096077888e-32	-2.84585898680613	-2.05147104689937
citations	J Neurophysiol	ns(pub_date, df = 3)3	-2.37940062706124	0.104458662964902	-22.7783944339851	1.31512261578654e-100	-2.58413584434566	-2.17466540977683
citations	J Neurophysiol	log2(authors)	0.22793687405411	0.0366733625929213	6.21532518259197	6.41059993423995e-10	0.156058404180006	0.299815343928214
citations	J Neurophysiol	log2(references + 1)	0.299643316297373	0.0418046608750809	7.16770116118764	1.12681685183016e-12	0.217707686596304	0.381578945998442
citations	J Neurophysiol	any_affil_usaTRUE	0.177722372443526	0.0547619963088749	3.24535963665598	0.00119553428588925	0.070390831956616	0.285053912930436
citations	J Neurophysiol	any_affil_nature_indexTRUE	0.15043107414508	0.0532020674401025	2.82754188668406	0.00474493560131647	0.0461569380594083	0.254705210230752
citations	J Neurophysiol	last_author_pub_age	-0.00264991556825104	0.00300184468497339	-0.882762383249196	0.377487882293593	-0.00853342303798186	0.00323359190147978
citations	J Neurophysiol	PC1	0.0630448056309323	0.0112945752352362	5.58186601247728	2.75938432737917e-08	0.0409078449491914	0.0851817663126731
citations	J Neurophysiol	PC2	0.00687789741750082	0.0160029316870871	0.429789838011411	0.66740229941282	-0.0244872723362446	0.0382430671712463
citations	J Neurophysiol	PC3	-0.0280863623521364	0.0178191998720456	-1.57618538171278	0.115166768681855	-0.0630113523346665	0.0068386276303936
citations	J Neurophysiol	PC4	0.00987132357238379	0.0185924543021839	0.530931710894366	0.595534569649464	-0.0265692172441034	0.0463118643888709
citations	J Neurophysiol	PC5	0.0111408628040247	0.0202984333759104	0.548853332555523	0.583177261715908	-0.0286433355553455	0.0509250611633949
citations	J Neurophysiol	PC6	-0.0134061497684958	0.0202095643997221	-0.66335669108633	0.50719092744672	-0.0530161681351939	0.0262038685982024
citations	J Neurophysiol	PC7	-0.0442067983595502	0.0212374698677452	-2.08154731400891	0.0375312391399884	-0.0858314744230854	-0.00258212229601497
citations	J Neurophysiol	PC8	-0.0442625145198946	0.0215879803813563	-2.05033142230018	0.0404832097018951	-0.0865741785663101	-0.00195085047347902
citations	J Neurophysiol	PC9	0.0331242183702223	0.0227086811936901	1.45865883129427	0.144841399961037	-0.0113839789058124	0.0776324156462569
citations	J Neurophysiol	PC10	-0.0221272672617306	0.0229790383225017	-0.962932693317415	0.335716499282161	-0.0671653547731996	0.0229108202497383
citations	J Neurophysiol	PC11	-0.018237379486832	0.0233613851781923	-0.780663447296628	0.435107763321344	-0.0640248530650568	0.0275500940913928
citations	J Neurophysiol	PC12	-0.00435533857470717	0.0238125542525036	-0.18290094076108	0.854897275372099	-0.0510270872895203	0.042316410140106
citations	J Neurophysiol	PC13	-0.0274841507265298	0.0244919677178034	-1.12216997193538	0.261946621771161	-0.0754875253639421	0.0205192239108826
citations	J Neurophysiol	PC14	-0.00284906348437091	0.0251480463191742	-0.113291642945585	0.909812548344192	-0.0521383285514973	0.0464402015827555
citations	J Neurophysiol	PC15	-0.0092146072206326	0.0255251437202987	-0.361001188538059	0.718142840209786	-0.0592429696126268	0.0408137551713616
citations	J Neurosci	(Intercept)	4.10331011128968	0.0821928703837964	49.9229445586878	0	3.94221504555147	4.26440517702789
citations	J Neurosci	preprintTRUE	0.070907192659024	0.196266168179099	0.361280771499646	0.717912166734223	-0.31376742835569	0.455581813673739
citations	J Neurosci	preprint_age	0.830510597820802	0.358955579241621	2.31368627721417	0.0207446978371175	0.126970590457512	1.53405060518409
citations	J Neurosci	ns(pub_date, df = 3)1	-0.540133633006524	0.0755960509897632	-7.14499799836987	1.09752938467301e-12	-0.688299170319914	-0.391968095693135
citations	J Neurosci	ns(pub_date, df = 3)2	-2.01508464646196	0.130288969986139	-15.4662719850831	3.46661689198382e-52	-2.27044633521761	-1.75972295770631
citations	J Neurosci	ns(pub_date, df = 3)3	-2.05173411787445	0.067050444650313	-30.5998584882595	1.02027148695825e-181	-2.18315057453646	-1.92031766121244
citations	J Neurosci	log2(authors)	0.145685137552521	0.0231766520446272	6.28585773613898	3.67779216883941e-10	0.100259734262835	0.191110540842207
citations	J Neurosci	log2(references + 1)	0.0440028330207185	0.00757061964953167	5.81231590777917	6.73393086890976e-09	0.0291646911669851	0.0588409748744518
citations	J Neurosci	any_affil_usaTRUE	0.0327611535066503	0.044203165525801	0.741149488208664	0.458654339313485	-0.0538754589265822	0.119397765939883
citations	J Neurosci	any_affil_nature_indexTRUE	0.0554461378663915	0.0377083610659819	1.47039373494309	0.141548309472442	-0.0184608917389653	0.129353167471748
citations	J Neurosci	last_author_pub_age	-0.00578490900024288	0.00209402843134922	-2.76257423903053	0.00576580357945903	-0.00988912930829025	-0.0016806886921955
citations	J Neurosci	PC1	-0.0484940872117285	0.00729075461082393	-6.65144965100508	3.37219374577004e-11	-0.0627837036690627	-0.0342044707543942
citations	J Neurosci	PC2	0.0594634417362284	0.0115247654778205	5.15962271429003	2.61716555420283e-07	0.0368753164694296	0.0820515670030271
citations	J Neurosci	PC3	-0.0813736687994398	0.0131553371324319	-6.18560117314127	6.92769222632446e-10	-0.107157655783489	-0.0555896818153908
citations	J Neurosci	PC4	0.01867142733556	0.0135289316124808	1.38011099992073	0.167643825846244	-0.00784479137420767	0.0451876460453278
citations	J Neurosci	PC5	-0.0169983579704424	0.0145095041364561	-1.17153265959882	0.241467387653655	-0.0454364635114313	0.0114397475705465
citations	J Neurosci	PC6	-0.0203270943844348	0.0145210946577285	-1.39983209692915	0.16165546034572	-0.0487879169296796	0.0081337281608101
citations	J Neurosci	PC7	0.0139182025109109	0.0149335712220883	0.932007642641055	0.351399201286153	-0.0153510592449461	0.0431874642667678
citations	J Neurosci	PC8	0.0135139770962497	0.0151329652828263	0.89301579985689	0.371912343053061	-0.0161460898373849	0.0431740440298843
citations	J Neurosci	PC9	0.0112378366893317	0.0155617470600846	0.722144926655212	0.470255379934873	-0.0192626270849561	0.0417383004636196
citations	J Neurosci	PC10	-0.0307932643752666	0.0159696462362196	-1.92823710179795	0.0539093830933188	-0.0620931958441026	0.000506667093569491
citations	J Neurosci	PC11	-0.0347449512080095	0.0165376627412786	-2.10095898988706	0.0357185079115153	-0.0671581745693856	-0.00233172784663351
citations	J Neurosci	PC12	-0.0323116671312314	0.0167991048131326	-1.92341600880851	0.0545118049466276	-0.0652373075374848	0.000613973275021947
citations	J Neurosci	PC13	-0.076378098105736	0.0170511538021923	-4.47935072264236	7.73510783615904e-06	-0.109797745452886	-0.042958450758586
citations	J Neurosci	PC14	0.0737596296571305	0.0172016443287065	4.28794063216612	1.85383910039228e-05	0.040045026297998	0.107474233016263
citations	J Neurosci	PC15	0.0962170667943176	0.0175252143569598	5.49020769929167	4.31108402450186e-08	0.0618682778333321	0.130565855755303
citations	J Virol	(Intercept)	2.76864648552982	0.216661437610569	12.7786767966815	1.68872186558113e-36	2.34399787097444	3.19329510008521
citations	J Virol	preprintTRUE	-0.24976609083349	0.297340233873879	-0.840000990042376	0.400971158837753	-0.83254224038101	0.33301005871403
citations	J Virol	preprint_age	1.5860347536961	1.10967578709814	1.42927760715015	0.153022962915051	-0.588889823532399	3.76095933092459
citations	J Virol	ns(pub_date, df = 3)1	-0.883513560239733	0.0816766082713084	-10.8172165683586	8.33172494897812e-27	-1.04359677083088	-0.723430349648583
citations	J Virol	ns(pub_date, df = 3)2	-2.65878546374853	0.15589180846798	-17.0553250352128	1.79579547919247e-62	-2.96432779383059	-2.35324313366648
citations	J Virol	ns(pub_date, df = 3)3	-2.42253509191414	0.0694245448651333	-34.8945044813797	4.61297414855714e-226	-2.55860469949289	-2.28646548433539
citations	J Virol	log2(authors)	0.247188479986572	0.0247686497240608	9.9798932416751	4.07806304552022e-23	0.198642818581725	0.29573414139142
citations	J Virol	log2(references + 1)	0.102293232855437	0.0355364145022405	2.87854681706811	0.00402185744691121	0.032643140291359	0.171943325419516
citations	J Virol	any_affil_usaTRUE	0.0746323226642932	0.0387875970503547	1.92412854468412	0.0544278713464042	-0.001389970601254	0.15065461592984
citations	J Virol	any_affil_nature_indexTRUE	0.0438479880990254	0.0389780348111966	1.12494096512095	0.260699192882463	-0.0325475563190684	0.120243532517119
citations	J Virol	last_author_pub_age	-0.00393279127502315	0.0021280074791358	-1.84810970524422	0.064679530611435	-0.0081036092929612	0.000238026742914886
citations	J Virol	PC1	0.0167432114218398	0.0115353561663246	1.45146896033592	0.146748241078674	-0.00586567121299855	0.0393520940566781
citations	J Virol	PC2	0.0132048172103411	0.0124380294384313	1.0616486538889	0.28847606548159	-0.0111732725276332	0.0375829069483155
citations	J Virol	PC3	0.0156891265038718	0.0128889125319765	1.21725758204567	0.223596807522631	-0.00957267785868895	0.0409509308664326
citations	J Virol	PC4	-0.00306106873883697	0.0132616139964931	-0.230821734039796	0.817468186551287	-0.0290533545488357	0.0229312170711618
citations	J Virol	PC5	0.0115513722048039	0.0145903257956577	0.791714480305968	0.428586394718308	-0.0170451408773909	0.0401478852869987
citations	J Virol	PC6	0.0337592773704545	0.0154826797572101	2.18045441098355	0.029297071157126	0.00341378266215529	0.0641047720787537
citations	J Virol	PC7	0.0321494817504701	0.0155688472690896	2.06498793358322	0.0390052503543738	0.00163510182224976	0.0626638616786904
citations	J Virol	PC8	-0.00948736062538088	0.0158328341389948	-0.599220615973889	0.549068584048515	-0.0405191453110069	0.0215444240602451
citations	J Virol	PC9	-0.00776661684518551	0.0162603556805301	-0.47764126429812	0.632938476831554	-0.0396363283548358	0.0241030946644648
citations	J Virol	PC10	0.00431198144891389	0.0166191877536134	0.259458014004106	0.795298715595025	-0.0282610280004774	0.0368849908983052
citations	J Virol	PC11	-0.0804139748515938	0.016931912067067	-4.74925540205238	2.13224229316637e-06	-0.113599912692444	-0.0472280370107433
citations	J Virol	PC12	-0.0707839602946687	0.0172667266388259	-4.09944292136439	4.24535556479721e-05	-0.104626122637666	-0.0369417979516717
citations	J Virol	PC13	0.0373815327877676	0.0176289011749715	2.1204686790598	0.034043972907923	0.00282952139780767	0.0719335441777275
citations	J Virol	PC14	-0.00606732800178978	0.0181047481099399	-0.335123580010412	0.737554033077903	-0.0415519822464415	0.029417326242862
citations	J Virol	PC15	-0.0237351360221811	0.0186490888869935	-1.27272362558874	0.203209437778657	-0.0602866785851746	0.0128164065408123
citations	MBio	(Intercept)	2.95497565159642	0.295569502719622	9.99756613725983	6.70716212576998e-23	2.37567007133755	3.5342812318553
citations	MBio	preprintTRUE	0.535970951330157	0.174093025601045	3.07864688708668	0.00211304081465168	0.1947548911925	0.877187011467815
citations	MBio	preprint_age	-0.777168247805641	0.332713527635758	-2.33584805922426	0.0196161366640546	-1.429274779141	-0.125061716470285
citations	MBio	ns(pub_date, df = 3)1	-0.910654299951768	0.106324575523955	-8.56485243852771	2.40477518904645e-17	-1.11904663865023	-0.702261961253308
citations	MBio	ns(pub_date, df = 3)2	-2.82995455436592	0.224073744029596	-12.6295678533052	5.3276423285574e-35	-3.26913102254498	-2.39077808618687
citations	MBio	ns(pub_date, df = 3)3	-2.61808573426356	0.0889568838268694	-29.4309515085866	6.35018601864661e-154	-2.79243802274114	-2.44373344578599
citations	MBio	log2(authors)	0.194596516249089	0.0319201710031914	6.09634942837971	1.34296410058216e-09	0.132034130702474	0.257158901795703
citations	MBio	log2(references + 1)	0.182708407100149	0.0492714443184533	3.70820075659363	0.000215509725841816	0.0861381507697103	0.279278663430589
citations	MBio	any_affil_usaTRUE	0.0817888076492658	0.0578689289773999	1.41334579876548	0.157739105473577	-0.0316322089703442	0.195209824268876
citations	MBio	any_affil_nature_indexTRUE	0.0965817616715765	0.0569448764244562	1.69605709478891	0.0900601174533003	-0.0150281452244416	0.208191668567595
citations	MBio	last_author_pub_age	-0.00741703357294164	0.00280456436618952	-2.64462946985914	0.00825412872889491	-0.0129138787229975	-0.00192018842288577
citations	MBio	PC1	-0.0578032465905402	0.0160319246463555	-3.60550887467404	0.000320628111542543	-0.089225241500257	-0.0263812516808234
citations	MBio	PC2	-0.0571750622162563	0.0190552578993186	-3.00048745172328	0.00273511566372979	-0.094522681415043	-0.0198274430174695
citations	MBio	PC3	0.0777604007766339	0.0194861725196694	3.99054256027665	6.87547564481527e-05	0.0395682044415478	0.11595259711172
citations	MBio	PC4	-0.000281553365043867	0.0214720461846238	-0.0131125539980204	0.989539550474997	-0.0423659905612872	0.0418028838311995
citations	MBio	PC5	-0.0889946838005989	0.0228056882439515	-3.90230204186897	9.90388950031012e-05	-0.133693011401392	-0.0442963561998056
citations	MBio	PC6	-0.0200525818101879	0.023960676485363	-0.836895478407613	0.402770207947862	-0.0670146447667151	0.0269094811463393
citations	MBio	PC7	-0.000448731887869392	0.0243905029981054	-0.0183978119641177	0.985323679981457	-0.0482532393289722	0.0473557755532334
citations	MBio	PC8	0.0586522286333734	0.0247808787730945	2.3668340889127	0.0180536681053892	0.010082598732855	0.107221858533892
citations	MBio	PC9	0.0545627599193368	0.0255145647022679	2.13849464241445	0.0326203115179689	0.00455513202167476	0.104570387816999
citations	MBio	PC10	0.0484056324691035	0.026702521212925	1.81277386068224	0.0700449102769664	-0.00393034740464627	0.100741612342853
citations	MBio	PC11	0.0979556955081901	0.0274500608782125	3.56850558338612	0.000369093539579634	0.0441545648134618	0.151756826202918
citations	MBio	PC12	-0.0301923848661259	0.027359733086181	-1.10353360433095	0.269953359396843	-0.0838164763416694	0.0234317066094177
citations	MBio	PC13	-0.0285659479595424	0.0278621921211397	-1.02525845185989	0.305388677378025	-0.0831748410473118	0.026042945128227
citations	MBio	PC14	-0.0680505982107071	0.0292030330984073	-2.33025788730207	0.0199102725136386	-0.125287491322917	-0.0108137050984976
citations	MBio	PC15	-0.0257200771131126	0.0297267024564749	-0.865217968618325	0.387042547993096	-0.0839833433069417	0.0325431890807165
citations	Mol Biol Cell	(Intercept)	1.07224661239205	0.244328255165618	4.38854937864321	1.24490620678427e-05	0.59337203186193	1.55112119292218
citations	Mol Biol Cell	preprintTRUE	0.391876942831155	0.212244987109258	1.84634251281246	0.0650968838190138	-0.0241155878021586	0.807869473464468
citations	Mol Biol Cell	preprint_age	-0.140684683051493	0.365269163271483	-0.385153462699861	0.700194268569983	-0.856599087726681	0.575229721623695
citations	Mol Biol Cell	ns(pub_date, df = 3)1	-0.711781182244841	0.125282732272206	-5.68139893930738	1.68788802366191e-08	-0.957330825383139	-0.466231539106544
citations	Mol Biol Cell	ns(pub_date, df = 3)2	-2.09741513663459	0.242513713979567	-8.64864548159656	1.70690859072142e-17	-2.57273328179159	-1.62209699147759
citations	Mol Biol Cell	ns(pub_date, df = 3)3	-2.64314105587147	0.114117905804305	-23.161492819576	7.17800304189905e-98	-2.86680804123904	-2.41947407050389
citations	Mol Biol Cell	log2(authors)	0.204566951173245	0.0365180033702235	5.60181095059671	2.64708912968858e-08	0.132992979780295	0.276140922566196
citations	Mol Biol Cell	log2(references + 1)	0.369524655804536	0.0393844137720991	9.3825099934918	3.27232572648955e-20	0.292332623258998	0.446716688350073
citations	Mol Biol Cell	any_affil_usaTRUE	0.0214088381385571	0.0616576928141545	0.347220876445808	0.728488318326428	-0.0994380191470196	0.142255695424134
citations	Mol Biol Cell	any_affil_nature_indexTRUE	0.147213027065087	0.0635777981172756	2.31547853849134	0.0207603727151285	0.0226028325388682	0.271823221591306
citations	Mol Biol Cell	last_author_pub_age	-0.00695467740947952	0.00333923688811018	-2.0827145969316	0.0374957049819167	-0.0134994614460231	-0.000409893372935962
citations	Mol Biol Cell	PC1	-0.025343179644931	0.016555585982868	-1.5307932725037	0.126092906088737	-0.0577915319143084	0.00710517262444647
citations	Mol Biol Cell	PC2	-0.0247293262652209	0.0180759990836138	-1.36807521126942	0.171553247017291	-0.060157633453683	0.0106989809232412
citations	Mol Biol Cell	PC3	0.0122171782292054	0.0198222899901754	0.616335359600762	0.537794029400935	-0.0266337962426473	0.051068152701058
citations	Mol Biol Cell	PC4	0.0468836306694575	0.0212123973532293	2.21019953043262	0.0272857971776322	0.00530809583137538	0.0884591655075396
citations	Mol Biol Cell	PC5	-0.0203347991053148	0.0222513604219365	-0.913867679086612	0.360976121222227	-0.0639466641393303	0.0232770659287007
citations	Mol Biol Cell	PC6	0.073606446456817	0.0235208717124879	3.12940980064686	0.00179524082398415	0.0275063850153538	0.11970650789828
citations	Mol Biol Cell	PC7	-0.0817082369818077	0.0242104190443482	-3.37492039407233	0.000762771264041668	-0.129159786359353	-0.0342566876042627
citations	Mol Biol Cell	PC8	-0.065533715896277	0.0245380773258965	-2.67069481548643	0.00767522266151349	-0.113627463704893	-0.0174399680876609
citations	Mol Biol Cell	PC9	0.012743329216857	0.02642540328798	0.482237832966339	0.629727902944186	-0.03904950950453	0.0645361679382441
citations	Mol Biol Cell	PC10	-0.0646534700150904	0.0265308637140475	-2.43691538699729	0.0149625611626392	-0.116653007373364	-0.0126539326568167
citations	Mol Biol Cell	PC11	-0.0147759576569115	0.0272463356490661	-0.542309903512397	0.58770910776936	-0.0681777942397708	0.0386258789259479
citations	Mol Biol Cell	PC12	0.0383740414188178	0.027199571256456	1.41083258471251	0.158561870334804	-0.0149361386387668	0.0916842214764024
citations	Mol Biol Cell	PC13	-0.00714292871161245	0.0278284993613937	-0.25667674777756	0.797473799534695	-0.0616857852037401	0.0473999277805152
citations	Mol Biol Cell	PC14	-0.0141647372223924	0.0282219951203346	-0.501904176582698	0.615830093253684	-0.0694788312301133	0.0411493567853284
citations	Mol Biol Cell	PC15	-0.000364047140467299	0.0284208415489307	-0.0128091611868895	0.989782248207646	-0.056067872986691	0.0553397787057564
citations	Mol Biol Evol	(Intercept)	3.55101589363095	0.344057455964789	10.3209967755919	1.31893333139832e-23	2.87667567132749	4.22535611593441
citations	Mol Biol Evol	preprintTRUE	0.366260419496744	0.256463407220634	1.42811960375171	0.153625614640202	-0.136398622008128	0.868919461001616
citations	Mol Biol Evol	preprint_age	-0.148567167652361	0.407714097462884	-0.364390558425284	0.715657228145346	-0.947672114668866	0.650537779364145
citations	Mol Biol Evol	ns(pub_date, df = 3)1	-1.0132687416841	0.211053443513606	-4.80100549327819	1.86571922116081e-06	-1.42692588978393	-0.599611593584275
citations	Mol Biol Evol	ns(pub_date, df = 3)2	-3.39417938597256	0.3977468857975	-8.53351592977801	6.4921101488316e-17	-4.17374895709863	-2.6146098148465
citations	Mol Biol Evol	ns(pub_date, df = 3)3	-2.51810054353527	0.212733163579069	-11.8368969894971	5.02041434217113e-30	-2.93504988246751	-2.10115120460303
citations	Mol Biol Evol	log2(authors)	0.111879084243715	0.0504488354359198	2.21767426892984	0.026841406387383	0.0130011837273242	0.210756984760106
citations	Mol Biol Evol	log2(references + 1)	0.149712802502636	0.0466470206176659	3.20948263190763	0.00137973358031052	0.0582863221059133	0.241139282899358
citations	Mol Biol Evol	any_affil_usaTRUE	0.0443546414713318	0.104548149306095	0.424250852508837	0.671490481465289	-0.16055596581893	0.249265248761594
citations	Mol Biol Evol	any_affil_nature_indexTRUE	0.109582131864145	0.0992067038939486	1.10458394002575	0.269653226376464	-0.0848594347929236	0.304023698521214
citations	Mol Biol Evol	last_author_pub_age	-0.00136890356905422	0.00628481683457228	-0.217811211541439	0.827628608112092	-0.0136869182142469	0.0109491110761385
citations	Mol Biol Evol	PC1	0.0780827640245697	0.0284147410879367	2.74796676073601	0.00612392900476815	0.0223908948621833	0.133774633186956
citations	Mol Biol Evol	PC2	-0.163213943875979	0.031799623097299	-5.13257479110947	3.54543324667326e-07	-0.225540059868633	-0.100887827883325
citations	Mol Biol Evol	PC3	0.0458869682437618	0.0373012739652146	1.23017160986388	0.218973999829764	-0.0272221853055204	0.118996121793044
citations	Mol Biol Evol	PC4	-0.00876098173045243	0.037108269261834	-0.236092437204101	0.813417952518434	-0.0814918530122619	0.063969889551357
citations	Mol Biol Evol	PC5	-0.0644078287021891	0.0378506027488323	-1.70163284134692	0.0891907720550445	-0.138593646883033	0.00977798947865484
citations	Mol Biol Evol	PC6	0.0770817505394682	0.040322628468258	1.91162514616692	0.0562610846713826	-0.00194914902030693	0.156112650099243
citations	Mol Biol Evol	PC7	0.136790994685119	0.040935825270237	3.34159611494567	0.00086941835142122	0.0565582514780296	0.217023737892208
citations	Mol Biol Evol	PC8	-0.00729490746955997	0.0420015410489508	-0.173681900410704	0.862156913217581	-0.0896164152206842	0.0750266002815642
citations	Mol Biol Evol	PC9	-0.0236298470665297	0.0424736970538045	-0.556340716858155	0.578124728879829	-0.106876763582251	0.0596170694491921
citations	Mol Biol Evol	PC10	-0.0174185214142057	0.0442207200618298	-0.393899542790143	0.693754233208031	-0.10408954010582	0.0692524972774085
citations	Mol Biol Evol	PC11	-0.00402955691895377	0.0442704071854295	-0.0910214559824514	0.927497037922733	-0.0907979605833187	0.0827388467454112
citations	Mol Biol Evol	PC12	0.0047287174972856	0.0458907491935759	0.103042935240368	0.917953257251867	-0.0852154981456836	0.0946729331402548
citations	Mol Biol Evol	PC13	-0.0443756042189785	0.04579125140123	-0.96908476752803	0.332779208035363	-0.134124807772409	0.0453735993344515
citations	Mol Biol Evol	PC14	0.0399113611353812	0.048492830783876	0.823036322900164	0.410718722122914	-0.055132840709411	0.134955562980173
citations	Mol Biol Evol	PC15	0.0528850819215684	0.0477691127344081	1.10709784826033	0.26856556442722	-0.0407406586113052	0.146510822454442
citations	Mol Cell	(Intercept)	5.04354849858945	0.450866624268496	11.1863425392649	1.18957114832762e-27	4.15986615319204	5.92723084398685
citations	Mol Cell	preprintTRUE	0.0348032776854988	0.277516172962119	0.125409907876791	0.900220907049878	-0.509118426447643	0.57872498181864
citations	Mol Cell	preprint_age	0.582087580077596	0.467706275311649	1.24455798607733	0.213547188665683	-0.334599874876611	1.4987750350318
citations	Mol Cell	ns(pub_date, df = 3)1	-0.888709814378458	0.129630257592872	-6.85572821408425	1.15367983135318e-11	-1.14278045056714	-0.63463917818978
citations	Mol Cell	ns(pub_date, df = 3)2	-2.87803115907866	0.259175104012927	-11.1045818619025	2.72572116037882e-27	-3.38600502863342	-2.3700572895239
citations	Mol Cell	ns(pub_date, df = 3)3	-2.92702255031756	0.104414230758181	-28.0327933181485	2.7762441261712e-132	-3.13167068207705	-2.72237441855807
citations	Mol Cell	log2(authors)	0.17184034891115	0.037171351437051	4.62292443690561	4.21035737974519e-06	0.0989858388378486	0.244694858984451
citations	Mol Cell	log2(references + 1)	0.0564284873979617	0.0762005286594714	0.740526193067925	0.459131543815942	-0.0929218043775144	0.205778779173438
citations	Mol Cell	any_affil_usaTRUE	-0.0833325378385751	0.0609529848264923	-1.36716090402772	0.171841347803581	-0.202798192848717	0.0361331171715662
citations	Mol Cell	any_affil_nature_indexTRUE	-0.0662170541722698	0.076851175843572	-0.861627079162099	0.38907191755312	-0.216842590995226	0.084408482650686
citations	Mol Cell	last_author_pub_age	0.00138333065444173	0.00335283162134614	0.412585781413722	0.679986824123978	-0.00518809856962374	0.00795475987850721
citations	Mol Cell	PC1	-0.0141557352042762	0.0144792333714565	-0.977657783469529	0.328448686528551	-0.0425345111360813	0.014223040727529
citations	Mol Cell	PC2	-0.00405069434358745	0.0157986854553786	-0.25639439148454	0.797692056974224	-0.0350155488392063	0.0269141601520314
citations	Mol Cell	PC3	0.0887836905202484	0.0173851159728731	5.10687939377467	3.82936288966361e-07	0.0547094893463651	0.122857891694132
citations	Mol Cell	PC4	-0.0115538717348938	0.0180368056805143	-0.640571947136727	0.52192811363305	-0.0469053612648493	0.0237976177950617
citations	Mol Cell	PC5	-0.051528951302754	0.018568104951813	-2.77513248855924	0.00560709581469411	-0.0879217682694673	-0.0151361343360407
citations	Mol Cell	PC6	-0.0892344059741645	0.0206122455069921	-4.32919382528675	1.62649650702035e-05	-0.129633664808367	-0.0488351471399625
citations	Mol Cell	PC7	0.0473495753335509	0.0205550511468723	2.30354938040403	0.0214251745304183	0.00706241538530247	0.0876367352817992
citations	Mol Cell	PC8	-0.0238318019178123	0.0218518614949912	-1.09060740309355	0.275673531624687	-0.0666606634431527	0.0189970596075281
citations	Mol Cell	PC9	-0.00401381620509793	0.022689389418756	-0.176902786188681	0.859615818875875	-0.0484842022970639	0.0404565698868681
citations	Mol Cell	PC10	0.0166470417320163	0.0227164591692589	0.732818508728857	0.463818080997194	-0.0278764000960058	0.0611704835600384
citations	Mol Cell	PC11	-0.0579588524386761	0.0236608887581916	-2.4495636250608	0.0144508919493603	-0.10433334224694	-0.011584362630412
citations	Mol Cell	PC12	-0.0171751759259212	0.024033372888344	-0.714638598823183	0.474977046768748	-0.0642797212140967	0.0299293693622544
citations	Mol Cell	PC13	-0.0139004166119768	0.0248322318063268	-0.559773149686659	0.575742907371036	-0.0625706966081274	0.0347698633841738
citations	Mol Cell	PC14	-0.0296421699439762	0.0252197341400377	-1.17535616273281	0.240094904854188	-0.0790719405581253	0.0197876006701729
citations	Mol Cell	PC15	-0.0015003925541441	0.0258448711100251	-0.0580537835826973	0.953715846823683	-0.0521554091148731	0.0491546240065849
citations	Mol Ecol	(Intercept)	2.82581915293132	0.373497341002188	7.56583472682543	6.95745817087056e-14	2.09377781624555	3.55786048961708
citations	Mol Ecol	preprintTRUE	0.302765836346412	0.189954616423022	1.59388511870732	0.111187973366066	-0.0695383705398317	0.675070043232655
citations	Mol Ecol	preprint_age	-0.0751100787743482	0.289704463868586	-0.259264485508305	0.795469377398406	-0.642920394117262	0.492700236568565
citations	Mol Ecol	ns(pub_date, df = 3)1	-1.36142153692488	0.118236913666674	-11.5143527914042	2.25447829556396e-29	-1.59316162935473	-1.12968144449503
citations	Mol Ecol	ns(pub_date, df = 3)2	-3.22197098674534	0.231454437111576	-13.9205410229061	2.39300637494027e-41	-3.67561334754602	-2.76832862594466
citations	Mol Ecol	ns(pub_date, df = 3)3	-3.12457934206535	0.108624090637513	-28.7650678935699	2.69774723342731e-143	-3.33747864756829	-2.91168003656241
citations	Mol Ecol	log2(authors)	0.112471628053619	0.0321295860325176	3.50056262597935	0.000478883783870527	0.0494987965917035	0.175444459515535
citations	Mol Ecol	log2(references + 1)	0.232306684263429	0.0587242243580961	3.95589191347747	8.0075169088538e-05	0.117209319501511	0.347404049025347
citations	Mol Ecol	any_affil_usaTRUE	0.126381986356041	0.0518205684330407	2.43883828714353	0.0148583823221726	0.0248155385688883	0.227948434143194
citations	Mol Ecol	any_affil_nature_indexTRUE	0.132868025368725	0.0521949966048065	2.54560846846553	0.0110154270512737	0.0305677118501137	0.235168338887336
citations	Mol Ecol	last_author_pub_age	-0.00296507032983985	0.00364885454796286	-0.812603048673245	0.416584135690808	-0.0101166938286722	0.00418655316899253
citations	Mol Ecol	PC1	0.0995925977641028	0.0158956227168121	6.26541026661183	4.94176142886226e-10	0.0684377497273144	0.130747445800891
citations	Mol Ecol	PC2	-0.0474334968581335	0.0171275230014134	-2.76943121630717	0.00568972066373824	-0.0810028250852852	-0.0138641686309818
citations	Mol Ecol	PC3	0.117527548379267	0.0202126734794522	5.81454741742815	7.52400372301804e-09	0.0779114363282729	0.157143660430261
citations	Mol Ecol	PC4	0.0520005042939317	0.0218305641396151	2.38200460424971	0.017351878173861	0.00921338481809448	0.094787623769769
citations	Mol Ecol	PC5	0.0449766059888857	0.02159970097805	2.08227910352054	0.0374985840255909	0.00264196999507319	0.0873112419826982
citations	Mol Ecol	PC6	0.0268268466977986	0.0221308622654828	1.21219166139948	0.225643990778578	-0.0165488462893641	0.0702025396849613
citations	Mol Ecol	PC7	-0.033318613328502	0.0231779210516304	-1.43751517896202	0.150795605863188	-0.0787465038262103	0.0121092771692063
citations	Mol Ecol	PC8	0.0243870280010116	0.0238553534453534	1.02228743149315	0.306821871395054	-0.0223686055903545	0.0711426615923777
citations	Mol Ecol	PC9	-0.001139180811294	0.0241137215919676	-0.0472420155864065	0.962327093667912	-0.0484012066647764	0.0461228450421884
citations	Mol Ecol	PC10	0.0380840141774652	0.0244261091834345	1.55915188503674	0.119186932112551	-0.00979028010450947	0.0859583084594398
citations	Mol Ecol	PC11	-0.0293776157941911	0.0253462144444094	-1.15905339073902	0.24663250001736	-0.0790552832496624	0.0203000516612803
citations	Mol Ecol	PC12	0.0235479853280791	0.0253251582892051	0.929825790590083	0.352621929757502	-0.0260884128215388	0.073184383477697
citations	Mol Ecol	PC13	0.0662871971431552	0.0265156589678665	2.49992644812209	0.012535827635051	0.0143174605397904	0.11825693374652
citations	Mol Ecol	PC14	-0.0479191183288463	0.0264705920961282	-1.81027753949846	0.0704675402016212	-0.0998005254867082	0.00396228882901565
citations	Mol Ecol	PC15	-0.0454359233220397	0.0268999952576289	-1.68906807926496	0.0914295349513535	-0.0981589452112905	0.00728709856721115
citations	Nat Genet	(Intercept)	4.6549882956903	0.472589527253661	9.84996075292154	1.47486767724732e-21	3.72872984280231	5.58124674857828
citations	Nat Genet	preprintTRUE	0.402536483962295	0.224548376936493	1.79264926985485	0.0734492894096327	-0.0375702476201549	0.842643215544745
citations	Nat Genet	preprint_age	0.252384753807153	0.255814887693686	0.986591343774173	0.324174896714365	-0.24900321278163	0.753772720395935
citations	Nat Genet	ns(pub_date, df = 3)1	-1.10597849548934	0.166072914198674	-6.65959588188022	5.45614838288564e-11	-1.43147542612635	-0.780481564852326
citations	Nat Genet	ns(pub_date, df = 3)2	-3.85534333446051	0.341173641256508	-11.3002379675689	2.27501490432298e-27	-4.52403138379765	-3.18665528512336
citations	Nat Genet	ns(pub_date, df = 3)3	-2.89359841065573	0.14136952770885	-20.4683318785296	1.01571369549439e-73	-3.17067759347652	-2.61651922783495
citations	Nat Genet	log2(authors)	0.174055245961959	0.0303334015076856	5.73807213536072	1.41142960254893e-08	0.114602871478303	0.233507620445616
citations	Nat Genet	log2(references + 1)	0.236022511664869	0.0809369693356077	2.91612737173533	0.00365438583598832	0.0773889667492551	0.394656056580483
citations	Nat Genet	any_affil_usaTRUE	0.0844904924916298	0.0940260288047414	0.898586206029039	0.369173925654328	-0.0997971375749891	0.268778122558249
citations	Nat Genet	any_affil_nature_indexTRUE	0.33461640594355	0.138134311134832	2.42239891880977	0.0156645751118783	0.0638781310900287	0.605354680797072
citations	Nat Genet	last_author_pub_age	-0.00170772581186144	0.00509368632175568	-0.335263246299161	0.737524309266366	-0.0116911675510469	0.00827571592732399
citations	Nat Genet	PC1	0.0575095907275996	0.0196896252751774	2.92080676619588	0.0036005894751466	0.0189186343191623	0.0961005471360369
citations	Nat Genet	PC2	-0.0356305071093701	0.0248735119782127	-1.43246788553943	0.152444571195914	-0.0843816947556926	0.0131206805369524
citations	Nat Genet	PC3	-0.0270093232538827	0.0248316261416047	-1.08769853008657	0.277092692208508	-0.0756784161689911	0.0216597696612258
citations	Nat Genet	PC4	-0.0630386982030712	0.0274208210104752	-2.29893547603806	0.0217945029627252	-0.116782519810122	-0.00929487659602071
citations	Nat Genet	PC5	-0.0919003952306142	0.0290356805657606	-3.165084938253	0.00161575567119633	-0.148809283406115	-0.0349915070551139
citations	Nat Genet	PC6	-0.0272479882179075	0.0299375930181315	-0.910159617755676	0.363043347227468	-0.0859245923172629	0.0314286158814479
citations	Nat Genet	PC7	0.0788212078646338	0.0302866893465263	2.60250326348971	0.00944524451746763	0.0194603875344894	0.138182028194778
citations	Nat Genet	PC8	0.052718160288559	0.0321196589554451	1.64130510730787	0.101171412443865	-0.0102352144598229	0.115671535036941
citations	Nat Genet	PC9	0.0428482574337489	0.0321776927237232	1.3316137300969	0.183409148179752	-0.0202188614103451	0.105915376277843
citations	Nat Genet	PC10	-0.0669231065908149	0.0329875611287764	-2.02873763021041	0.0428530541734344	-0.13157753834103	-0.00226867484059981
citations	Nat Genet	PC11	-0.0118337152436547	0.0342952630581596	-0.345053928397824	0.730154743396096	-0.0790511956779745	0.0553837651906651
citations	Nat Genet	PC12	-0.0601597003221464	0.0347528936963444	-1.73107024835962	0.0838682301981456	-0.12827412032553	0.00795471968123761
citations	Nat Genet	PC13	0.00188630293342769	0.035076532702489	0.0537767786065651	0.957127948862975	-0.0668624378659921	0.0706350437328475
citations	Nat Genet	PC14	-0.0629285402724945	0.0362382317713424	-1.73652347800974	0.0828996336941856	-0.133954169407741	0.00809708886275176
citations	Nat Genet	PC15	0.0809829119443946	0.0365246139918551	2.21721472436242	0.0269204268160567	0.00939598397113095	0.152569839917658
citations	Nat Methods	(Intercept)	3.65453835290696	0.516229155415957	7.07929475614813	4.71874994039105e-12	2.64274780052215	4.66632890529176
citations	Nat Methods	preprintTRUE	1.00887030631473	0.261228704697282	3.86201932702547	0.000126636815395503	0.49687145338001	1.52086915924945
citations	Nat Methods	preprint_age	0.188494680488639	0.363948553756812	0.517915728865871	0.604737338530777	-0.524831377100152	0.90182073807743
citations	Nat Methods	ns(pub_date, df = 3)1	-1.05851176585166	0.214026231234005	-4.94571043814876	1.0256811771195e-06	-1.47799547081715	-0.639028060886167
citations	Nat Methods	ns(pub_date, df = 3)2	-3.66114865742938	0.425727975274064	-8.59973708580579	9.44741848618453e-17	-4.49556015617771	-2.82673715868106
citations	Nat Methods	ns(pub_date, df = 3)3	-3.2777965195394	0.161214914477024	-20.3318441731801	4.6209797063821e-68	-3.59377194568508	-2.96182109339373
citations	Nat Methods	log2(authors)	0.229084102670145	0.0562230594222847	4.07455775306573	5.33036402017811e-05	0.118888931101812	0.339279274238478
citations	Nat Methods	log2(references + 1)	0.406256449674189	0.0933563187202752	4.35167597912104	1.62699693687863e-05	0.223281427253207	0.589231472095171
citations	Nat Methods	any_affil_usaTRUE	0.154331930931028	0.109210065343918	1.41316581438729	0.158205267442471	-0.0597158638923178	0.368379725754373
citations	Nat Methods	any_affil_nature_indexTRUE	0.0262443707380775	0.134732679280453	0.194788457249102	0.84563463830492	-0.237826828192196	0.290315569668351
citations	Nat Methods	last_author_pub_age	0.00397901368031371	0.00738629953688806	0.538701911619214	0.590323086869601	-0.0104978673910118	0.0184558947516392
citations	Nat Methods	PC1	-0.0488119238851712	0.0287662097082237	-1.69684933747864	0.090323568798557	-0.105192658885016	0.00756881111467377
citations	Nat Methods	PC2	-0.137571526854956	0.0328821747716226	-4.18377214434369	3.36561420848508e-05	-0.202019405140688	-0.0731236485692238
citations	Nat Methods	PC3	-0.0904975776112478	0.0347333043303492	-2.6054986519717	0.00943688904736712	-0.158573603162801	-0.0224215520596942
citations	Nat Methods	PC4	-0.03232523970512	0.0368333711935212	-0.877607415712352	0.380562090721037	-0.104517320673617	0.0398668412633767
citations	Nat Methods	PC5	0.0119297462201395	0.0388763944547109	0.306863493579301	0.759070118550099	-0.0642665867598665	0.0881260792001455
citations	Nat Methods	PC6	-0.0453658435133284	0.0405266102304165	-1.11940878487981	0.263482578925442	-0.124796539980437	0.0340648529537805
citations	Nat Methods	PC7	-0.129628026571281	0.0415955655761878	-3.11639052806844	0.00193196661194746	-0.211153837017184	-0.0481022161253792
citations	Nat Methods	PC8	0.00347840520548621	0.0446002921330178	0.0779906372611208	0.937865501081811	-0.0839365610751938	0.0908933714861662
citations	Nat Methods	PC9	-0.0775219755605102	0.046017440845921	-1.68462161596676	0.0926616368875135	-0.167714502279218	0.0126705511581973
citations	Nat Methods	PC10	-0.0769507159103279	0.0464834708348679	-1.65544255900543	0.098438094379067	-0.168056644623087	0.0141552128024311
citations	Nat Methods	PC11	-0.0336546347966873	0.0471685770304391	-0.71349692773155	0.475858405596848	-0.126103346978351	0.0587940773849766
citations	Nat Methods	PC12	0.0167962409158853	0.0477286218152012	0.351911290900418	0.725047354550156	-0.0767501388736418	0.110342620705413
citations	Nat Methods	PC13	-0.0263467764348514	0.0485120331058306	-0.543097758392749	0.587295211817143	-0.121428614139094	0.0687350612693913
citations	Nat Methods	PC14	0.0545438172928539	0.049532843371871	1.10116467337364	0.271334441272054	-0.0425387717678768	0.151626406353585
citations	Nat Methods	PC15	0.0310989157343128	0.0509131350175743	0.610823036601027	0.541583631211141	-0.0686889952401578	0.130886826708783
citations	Neuroimage	(Intercept)	2.67628439028609	0.220702768451837	12.1261931105777	3.99585467010077e-33	2.24371491283221	3.10885386773997
citations	Neuroimage	preprintTRUE	0.541912429712691	0.150392652918108	3.60331717805239	0.000318931457717141	0.247148246453766	0.836676612971616
citations	Neuroimage	preprint_age	-0.120532225878653	0.241011902387267	-0.500109018205156	0.617032459431302	-0.592906874403179	0.351842422645873
citations	Neuroimage	ns(pub_date, df = 3)1	-1.01746477952957	0.0846568795411252	-12.0186898577486	1.3947999937853e-32	-1.18338921447372	-0.851540344585416
citations	Neuroimage	ns(pub_date, df = 3)2	-3.21101266136839	0.171461628087861	-18.7272959972302	2.29104774496995e-74	-3.5470712771512	-2.87495404558558
citations	Neuroimage	ns(pub_date, df = 3)3	-2.88637769974214	0.0702951992484954	-41.0608082856231	8.07658565108999e-297	-3.02415375855526	-2.74860164092902
citations	Neuroimage	log2(authors)	0.183605112306757	0.0260947083174953	7.03610517783246	2.40430467045464e-12	0.132460423817388	0.234749800796125
citations	Neuroimage	log2(references + 1)	0.218942314383073	0.0347957534866372	6.29221363081431	3.55224792768428e-10	0.15074389073433	0.287140738031816
citations	Neuroimage	any_affil_usaTRUE	0.0946656644384187	0.0408362413982616	2.31817770678691	0.0205019585717894	0.0146281020338425	0.174703226842995
citations	Neuroimage	any_affil_nature_indexTRUE	0.111772833097455	0.0425980781199436	2.62389380062489	0.0087340874864706	0.0282821341717415	0.195263532023168
citations	Neuroimage	last_author_pub_age	-0.00940751587348802	0.00280799428841464	-3.35026175526852	0.000816644498973898	-0.0149110835475749	-0.00390394819940115
citations	Neuroimage	PC1	-0.057370282543755	0.011347054551108	-5.05596252184695	4.52126197603139e-07	-0.079610100794538	-0.035130464292972
citations	Neuroimage	PC2	-0.0826262638984808	0.0117412532761291	-7.0372610108383	2.3847513094864e-12	-0.105638697453057	-0.0596138303439048
citations	Neuroimage	PC3	-0.0816403090374344	0.0136459331866062	-5.98275749419367	2.43462499393026e-09	-0.108385846618623	-0.0548947714562464
citations	Neuroimage	PC4	0.0430538750287158	0.0140451497879277	3.06539094839146	0.00219186702855005	0.0155258872869071	0.0705818627705244
citations	Neuroimage	PC5	0.0282178374892649	0.0146280736683229	1.92901937254874	0.0538161601509007	-0.000452660063846585	0.0568883350423764
citations	Neuroimage	PC6	-0.0316226554921383	0.0154385888893321	-2.04828664839888	0.0406127704196416	-0.0618817336873495	-0.00136357729692704
citations	Neuroimage	PC7	0.0312577449590543	0.0165796500354548	1.8853078860055	0.0594781569323171	-0.00123777198671533	0.0637532619048239
citations	Neuroimage	PC8	0.00324142008021015	0.0166411152679509	0.194783824762803	0.845574462630669	-0.0293745665075532	0.0358574066679735
citations	Neuroimage	PC9	0.012508715349453	0.0172320491238274	0.72589831073292	0.467953819009074	-0.0212654803130736	0.0462829110119796
citations	Neuroimage	PC10	0.0242762199390823	0.0176465536615421	1.37569184355745	0.169012651625093	-0.0103103896887936	0.0588628295669583
citations	Neuroimage	PC11	0.0143994096411819	0.0178873221475719	0.805006446598634	0.420875339411949	-0.0206590975479247	0.0494579168302886
citations	Neuroimage	PC12	0.0130012791094487	0.0182628021407019	0.711899466975719	0.476578557258793	-0.022793155343108	0.0487957135620054
citations	Neuroimage	PC13	-0.0123703529867765	0.018472175220104	-0.669674948368471	0.50311299639626	-0.0485751511342937	0.0238344451607406
citations	Neuroimage	PC14	-0.00358470527802397	0.0191735118621261	-0.18696132997445	0.85170272001832	-0.0411640979849425	0.0339946874288946
citations	Neuroimage	PC15	-0.0770031035035521	0.0193764622341694	-3.97405380677599	7.22080201822905e-05	-0.114980271630325	-0.0390259353767796
citations	Neuron	(Intercept)	3.81553667602466	0.353236360147586	10.8016532455223	4.59130175731046e-26	3.12320613210537	4.50786721994395
citations	Neuron	preprintTRUE	0.344995568668283	0.244521253987899	1.41090217329475	0.158522281855132	-0.134257282602569	0.824248419939136
citations	Neuron	preprint_age	0.115441692896523	0.308176797854688	0.374595666189499	0.708024735722275	-0.488573731769545	0.719457117562592
citations	Neuron	ns(pub_date, df = 3)1	-0.879003051260951	0.112705548130234	-7.79911074337924	1.3072093025391e-14	-1.09990186645405	-0.658104236067847
citations	Neuron	ns(pub_date, df = 3)2	-3.21814148917217	0.219584811057668	-14.655574188722	5.34821451624749e-45	-3.64851981039723	-2.7877631679471
citations	Neuron	ns(pub_date, df = 3)3	-3.05547906900947	0.0959677608006872	-31.8385991661857	2.16183493646265e-163	-3.24357242385577	-2.86738571416317
citations	Neuron	log2(authors)	0.220733341242705	0.0300617567917951	7.34266273163884	3.76260829361309e-13	0.161813380618784	0.279653301866626
citations	Neuron	log2(references + 1)	0.217188679372506	0.057594589827062	3.77099099107492	0.000170198631953704	0.104305357607107	0.330072001137904
citations	Neuron	any_affil_usaTRUE	0.151605942956076	0.0618065759441598	2.45290959157884	0.0143064323782139	0.0304672800977829	0.272744605814369
citations	Neuron	any_affil_nature_indexTRUE	0.0987128147470186	0.0750107540348798	1.31598216838505	0.188421308296346	-0.0483055616145384	0.245731191108576
citations	Neuron	last_author_pub_age	-0.00338976158596465	0.00311550424632323	-1.08802983978118	0.276791670859068	-0.00949603770243978	0.00271651453051049
citations	Neuron	PC1	-0.0568759283305809	0.0127094491184914	-4.4750899744215	8.33359294967289e-06	-0.0817859908661683	-0.0319658657949935
citations	Neuron	PC2	-0.0280865092067514	0.0177409520614914	-1.58314554424146	0.113641252962705	-0.0628581362987261	0.00668511788522324
citations	Neuron	PC3	-0.113420109663812	0.0190687895487298	-5.94794490620234	3.51975083520585e-09	-0.150794250408096	-0.0760459689195278
citations	Neuron	PC4	-0.0323207427848954	0.0197489495443253	-1.63658035139305	0.101969907682873	-0.0710279726242717	0.00638648705448085
citations	Neuron	PC5	0.0218472671791225	0.0207026106225452	1.05529044512534	0.291496429525856	-0.0187291040270226	0.0624236383852675
citations	Neuron	PC6	0.0731623653954114	0.0212271175642595	3.44664626150638	0.000586434130738476	0.0315579794738652	0.114766751316958
citations	Neuron	PC7	-0.0970613795736046	0.0222232498539334	-4.36756010986509	1.36035333088877e-05	-0.140618148906749	-0.0535046102404602
citations	Neuron	PC8	-0.0500793620797714	0.0226024020779313	-2.21566548135467	0.0268940491240473	-0.0943792561166101	-0.00577946804293279
citations	Neuron	PC9	0.0361869175747558	0.0231006388411234	1.56648990634564	0.117487071838955	-0.00908950257371301	0.0814633377232247
citations	Neuron	PC10	-0.0129293765273132	0.0239819545822175	-0.539129389265888	0.589893585076741	-0.0599331437873347	0.0340743907327084
citations	Neuron	PC11	-0.0213344672920999	0.0243360870542548	-0.876659721200738	0.380839932771878	-0.0690323214430707	0.0263633868588709
citations	Neuron	PC12	-0.0479250419832859	0.0243607229503916	-1.96730787016794	0.0493685854525324	-0.0956711816034117	-0.000178902363160177
citations	Neuron	PC13	0.0121491776861429	0.0244952459560073	0.495981044973479	0.619994977312641	-0.0358606221800818	0.0601589775523675
citations	Neuron	PC14	0.102580262570223	0.0249223420211118	4.11599610033948	4.107787537437e-05	0.0537333697984546	0.151427155341991
citations	Neuron	PC15	-0.00741645588945482	0.0252256991137991	-0.294003978085897	0.768803673939099	-0.056857917637345	0.0420250058584354
citations	Nucleic Acids Res	(Intercept)	3.82655406330061	0.223085883161336	17.152829256046	4.59001701066562e-64	3.38931376684508	4.26379435975614
citations	Nucleic Acids Res	preprintTRUE	0.495182768785929	0.151001071171974	3.27933282156634	0.00104790696161494	0.199226107661891	0.791139429909967
citations	Nucleic Acids Res	preprint_age	-0.740954397013799	0.214273724562152	-3.45798066714838	0.000548942084430956	-1.16092317998887	-0.320985614038725
citations	Nucleic Acids Res	ns(pub_date, df = 3)1	-1.01518744407849	0.0875040819908868	-11.6016009879885	1.03029030746401e-30	-1.18669229328087	-0.843682594876117
citations	Nucleic Acids Res	ns(pub_date, df = 3)2	-2.69022727700672	0.183439653835464	-14.6654620239293	1.12395242712129e-47	-3.04976239186073	-2.33069216215272
citations	Nucleic Acids Res	ns(pub_date, df = 3)3	-2.45343831773749	0.0851613369719023	-28.8092977984477	1.48542337023731e-168	-2.6203514710777	-2.28652516439728
citations	Nucleic Acids Res	log2(authors)	0.275454409860141	0.0251371979557803	10.9580395692751	1.28334497562553e-27	0.226186407194558	0.324722412525724
citations	Nucleic Acids Res	log2(references + 1)	-0.022051459194301	0.036449180844174	-0.604991900601949	0.545212823135007	-0.0934905409148692	0.0493876225262673
citations	Nucleic Acids Res	any_affil_usaTRUE	0.117082776813891	0.0414365590734471	2.82559120332265	0.00473873636945387	0.0358686133866688	0.198296940241114
citations	Nucleic Acids Res	any_affil_nature_indexTRUE	0.00738038386011617	0.0419695834042304	0.175850777193377	0.860418554697386	-0.0748784880583253	0.0896392557785576
citations	Nucleic Acids Res	last_author_pub_age	-0.00617614426339561	0.00249024872373575	-2.48013148426815	0.0131672524242231	-0.0110569420744645	-0.00129534645232671
citations	Nucleic Acids Res	PC1	-0.0907927014330649	0.0125395220852389	-7.24052326842208	5.17583738870976e-13	-0.115369713103478	-0.0662156897626521
citations	Nucleic Acids Res	PC2	0.249927752162337	0.0137524519845003	18.1733230149807	1.93149128765902e-71	0.2229734415736	0.276882062751074
citations	Nucleic Acids Res	PC3	0.00964190465824609	0.0152906062112098	0.630577004277138	0.528346996745258	-0.0203271328175096	0.0396109421340018
citations	Nucleic Acids Res	PC4	0.0199368829582105	0.0155808329184877	1.27957748231508	0.200755285252718	-0.0106009884111615	0.0504747543275824
citations	Nucleic Acids Res	PC5	-0.00608767304353974	0.0166705487680189	-0.365175323755295	0.71499653960001	-0.0387613482313753	0.0265860021442958
citations	Nucleic Acids Res	PC6	-0.00499144248664308	0.0168484157877378	-0.296255894294573	0.767047413571381	-0.0380137306271653	0.0280308456538791
citations	Nucleic Acids Res	PC7	0.0644929368727016	0.0177064503907825	3.64234137556305	0.000273005267429622	0.0297889318127228	0.0991969419326805
citations	Nucleic Acids Res	PC8	-0.00659426018003612	0.0180402371173798	-0.36553068217065	0.714731327621224	-0.0419524752026632	0.0287639548425909
citations	Nucleic Acids Res	PC9	0.0361316007019978	0.0187072612898729	1.93142118144025	0.0534894738452601	-0.000533957675533485	0.0727971590795291
citations	Nucleic Acids Res	PC10	0.106676799962785	0.0188687657424452	5.65361833513125	1.66145680446205e-08	0.0696946986748689	0.1436589012507
citations	Nucleic Acids Res	PC11	-0.123634871339762	0.019129472806764	-6.46305690641125	1.12736894487781e-10	-0.161127949084258	-0.0861417935952663
citations	Nucleic Acids Res	PC12	-0.0460828581935536	0.0194342260155087	-2.37122168676946	0.0177684332134211	-0.084173241251362	-0.0079924751357451
citations	Nucleic Acids Res	PC13	0.0787509399199143	0.0197033679586341	3.99682633371343	6.51551075804525e-05	0.040133048346851	0.117368831492978
citations	Nucleic Acids Res	PC14	-0.0745861371561039	0.0199632478634741	-3.73617247384736	0.000189001031157107	-0.113713383982959	-0.0354588903292485
citations	Nucleic Acids Res	PC15	0.0961547298607839	0.0204057981774566	4.71212784839807	2.52033744195942e-06	0.0561601003571759	0.136149359364392
citations	PLoS Biol	(Intercept)	1.8860216325802	0.312211129736616	6.0408532974826	2.19082888242655e-09	1.27409906272387	2.49794420243653
citations	PLoS Biol	preprintTRUE	0.785356085756323	0.250467690522832	3.13555845912482	0.00176749088809201	0.294448433040648	1.276263738472
citations	PLoS Biol	preprint_age	-0.408263662188393	0.392764365589545	-1.0394620743549	0.298851883419679	-1.17806767315462	0.361540348777837
citations	PLoS Biol	ns(pub_date, df = 3)1	-1.40376402440864	0.167535949995434	-8.37888240969716	1.88471535259299e-16	-1.7321284525154	-1.07539959630189
citations	PLoS Biol	ns(pub_date, df = 3)2	-3.26988120741334	0.347570629164631	-9.40781795997073	3.62665048097307e-20	-3.95110712265994	-2.58865529216674
citations	PLoS Biol	ns(pub_date, df = 3)3	-3.08794837113788	0.129980685728216	-23.7569786144585	1.77548140939766e-98	-3.342705833851	-2.83319090842476
citations	PLoS Biol	log2(authors)	0.145684367015179	0.0366246330190868	3.97777001449424	7.48003730013362e-05	0.0739014053507727	0.217467328679586
citations	PLoS Biol	log2(references + 1)	0.435183181450171	0.0507733723236799	8.57109074173529	4.05683762126689e-17	0.335669200322116	0.534697162578226
citations	PLoS Biol	any_affil_usaTRUE	0.0479953559060239	0.0780727595701681	0.614751626178757	0.538864588435852	-0.10502444102516	0.201015152837208
citations	PLoS Biol	any_affil_nature_indexTRUE	0.319508707624537	0.0885147844104932	3.60966486844496	0.000322457263319536	0.146022918080643	0.492994497168431
citations	PLoS Biol	last_author_pub_age	-0.00456446518104775	0.00500922972890026	-0.911210990127588	0.362413195571179	-0.0143823750399796	0.00525344467788409
citations	PLoS Biol	PC1	0.138272357694143	0.0269859073707107	5.12387283461209	3.61875645397287e-07	0.0853809511574158	0.19116376423087
citations	PLoS Biol	PC2	0.00072894520026193	0.0297156209166994	0.0245307073443073	0.980434393394702	-0.057512601574714	0.0589704919752378
citations	PLoS Biol	PC3	-0.0446349169440956	0.034782242029694	-1.28326738989368	0.199708428575161	-0.112806858623851	0.02353702473566
citations	PLoS Biol	PC4	-0.023740881863009	0.0358093704818626	-0.662979592870356	0.507502939528765	-0.0939259583165114	0.0464441945904934
citations	PLoS Biol	PC5	0.153825453705901	0.036354183421794	4.23129992829611	2.54634560591203e-05	0.0825725635118213	0.22507834389998
citations	PLoS Biol	PC6	-0.0394606252740648	0.0383727233079375	-1.02835091889093	0.30404408209463	-0.114669780946343	0.0357485303982133
citations	PLoS Biol	PC7	-0.0535744106344437	0.0394002945986944	-1.3597464480943	0.174229767921633	-0.130797569028153	0.0236487477592654
citations	PLoS Biol	PC8	-0.0711770247182774	0.0403853830519129	-1.76244520515712	0.0783126219100192	-0.150330921001881	0.00797687156532612
citations	PLoS Biol	PC9	0.0299547740503458	0.0423121592650408	0.707947185174619	0.479150076263504	-0.0529755342172569	0.112885082317949
citations	PLoS Biol	PC10	-0.0974046569193974	0.0423577680183258	-2.29957010192926	0.0216866773231752	-0.180424356700818	-0.0143849571379763
citations	PLoS Biol	PC11	0.0471296504410925	0.0473833644194067	0.994645505201604	0.320159603104649	-0.0457400372872813	0.139999338169466
citations	PLoS Biol	PC12	-0.0180962853728089	0.0493549616037241	-0.366655849478839	0.713956623891695	-0.114830232574465	0.0786376618288474
citations	PLoS Biol	PC13	-0.0475278473125705	0.0518180237644107	-0.917206868572501	0.359264848844601	-0.149089307640856	0.054033613015715
citations	PLoS Comput Biol	(Intercept)	1.60385204157717	0.279905247061549	5.72998205076342	1.14420803155133e-08	1.05524783825275	2.1524562449016
citations	PLoS Comput Biol	preprintTRUE	0.418124788949745	0.126440751323884	3.30688314148575	0.000958783279860148	0.170305470176746	0.665944107722743
citations	PLoS Comput Biol	preprint_age	0.0110018367628844	0.159728978863892	0.0688781512355327	0.94509295310203	-0.302061209097704	0.324064882623473
citations	PLoS Comput Biol	ns(pub_date, df = 3)1	-1.10422203597024	0.103080751156562	-10.712204010748	3.96073677614128e-26	-1.30625659573643	-0.90218747620404
citations	PLoS Comput Biol	ns(pub_date, df = 3)2	-2.71333835714338	0.216892325943124	-12.5100708166821	1.00488626208149e-34	-3.13843950451502	-2.28823720977173
citations	PLoS Comput Biol	ns(pub_date, df = 3)3	-2.69463373116358	0.0904840875565717	-29.7801945505486	1.05996432997748e-163	-2.87197928394843	-2.51728817837873
citations	PLoS Comput Biol	log2(authors)	0.170561914654792	0.032540444088793	5.24153616924774	1.74659236915462e-07	0.106783816199818	0.234340013109765
citations	PLoS Comput Biol	log2(references + 1)	0.343984762627493	0.0432704598008727	7.94964426563721	2.9790733784193e-15	0.259176219823294	0.428793305431691
citations	PLoS Comput Biol	any_affil_usaTRUE	0.0962122768402643	0.049794541525162	1.93218521334606	0.0534666117948498	-0.00138323117573742	0.193807784856266
citations	PLoS Comput Biol	any_affil_nature_indexTRUE	0.214199838710527	0.052218027400835	4.10202854018767	4.24649302157271e-05	0.111854385661165	0.316545291759889
citations	PLoS Comput Biol	last_author_pub_age	-0.0049776878263464	0.00356013330680947	-1.39817456184171	0.162203469283532	-0.0119554208878545	0.00200004523516165
citations	PLoS Comput Biol	PC1	-0.00782937601831888	0.0139822314822784	-0.559951823730146	0.575570068158409	-0.0352340461470867	0.019575294110449
citations	PLoS Comput Biol	PC2	0.00600628608756987	0.0164126612170506	0.365954430432653	0.714434734722663	-0.0261619387883067	0.0381745109634465
citations	PLoS Comput Biol	PC3	-0.0710946069479514	0.018532218670991	-3.83627067056131	0.000128480979672186	-0.107417088096714	-0.0347721257991883
citations	PLoS Comput Biol	PC4	0.0582744925171693	0.0202414924244492	2.87896224720965	0.00402891350368502	0.0186018963719086	0.0979470886624301
citations	PLoS Comput Biol	PC5	0.0858587555789518	0.0214223018392548	4.00791456600719	6.33237356832796e-05	0.0438718155080663	0.127845695649837
citations	PLoS Comput Biol	PC6	0.0246492439302239	0.0226665830021783	1.08747065792207	0.27694957424588	-0.0197764424066333	0.069074930267081
citations	PLoS Comput Biol	PC7	-0.0073432065889539	0.0230999975246026	-0.317887765188417	0.750600646124289	-0.0526183697801395	0.0379319566022317
citations	PLoS Comput Biol	PC8	-0.0168481038263433	0.0239723822248191	-0.702813081667793	0.48224759624231	-0.0638331096106169	0.0301369019579302
citations	PLoS Comput Biol	PC9	-0.0360676098117244	0.0253884585404719	-1.42063015579417	0.155567907694933	-0.0858280741740377	0.013692854550589
citations	PLoS Comput Biol	PC10	-0.0248774126023812	0.0254281439441792	-0.978341661782043	0.328014375216807	-0.0747156589266727	0.0249608337219102
citations	PLoS Comput Biol	PC11	-0.049077628246688	0.0263440874060645	-1.86294660696389	0.0626047362453057	-0.10071109076815	0.00255583427477366
citations	PLoS Comput Biol	PC12	0.0580373626765948	0.0265621987495583	2.18496078671047	0.0289983014470676	0.00597640977726567	0.110098315575924
citations	PLoS Comput Biol	PC13	-0.0141066111005084	0.0273996924000387	-0.514845600985233	0.60671332769557	-0.0678090213920601	0.0395957991910432
citations	PLoS Comput Biol	PC14	0.0778398010373444	0.0283913512520905	2.74167299563148	0.0061628446308959	0.0221937751108209	0.133485826963868
citations	PLoS Comput Biol	PC15	-0.0152080437253973	0.0289599929161058	-0.525139759856071	0.599539661407145	-0.0719685868334998	0.0415524993827052
citations	PLoS Genet	(Intercept)	2.96088418842776	0.267707444000776	11.0601488855841	9.03561928577243e-28	2.43618723979296	3.48558113706255
citations	PLoS Genet	preprintTRUE	0.472593739913972	0.116442474901293	4.05860267324777	5.09430165945219e-05	0.24437068283673	0.700816796991215
citations	PLoS Genet	preprint_age	0.155018012004813	0.174526962936766	0.888218126278734	0.374512252728038	-0.187048549682406	0.497084573692032
citations	PLoS Genet	ns(pub_date, df = 3)1	-0.817979352493517	0.0884191054516293	-9.25116068880613	4.75407387568006e-20	-0.991277614723959	-0.644681090263074
citations	PLoS Genet	ns(pub_date, df = 3)2	-3.01322240677324	0.162598592472842	-18.5316635337819	9.00910421331737e-72	-3.33190979195691	-2.69453502158956
citations	PLoS Genet	ns(pub_date, df = 3)3	-2.83015350619817	0.073507844152985	-38.5013808908344	4.48665572652011e-253	-2.9742262333192	-2.68608077907714
citations	PLoS Genet	log2(authors)	0.163456688421526	0.023236813889071	7.03438471392176	2.59876862542066e-12	0.117913370083487	0.209000006759566
citations	PLoS Genet	log2(references + 1)	0.175095837184426	0.0423282599684788	4.13661788400509	3.64567684668976e-05	0.0921339721179593	0.258057702250893
citations	PLoS Genet	any_affil_usaTRUE	0.109681525375811	0.0427529663771959	2.56547170103065	0.0103636828813305	0.0258872510442551	0.193475799707367
citations	PLoS Genet	any_affil_nature_indexTRUE	0.0799303473878091	0.0468560846968494	1.70586910760778	0.088161569951207	-0.0119058910745741	0.171766585850192
citations	PLoS Genet	last_author_pub_age	-0.00213377600854975	0.00257806407960213	-0.827666009325512	0.407941791656734	-0.00718668875440633	0.00291913673730684
citations	PLoS Genet	PC1	-0.0901775582309908	0.0115878655101785	-7.78206807386406	1.05096889467348e-14	-0.112889357288635	-0.067465759173347
citations	PLoS Genet	PC2	0.0109438635732006	0.0122260980136597	0.895123166931385	0.370810826831744	-0.0130188482050291	0.0349065753514303
citations	PLoS Genet	PC3	-0.0721668770494813	0.0134193403547254	-5.37782596922277	8.26681437417845e-08	-0.098468300841028	-0.0458654532579346
citations	PLoS Genet	PC4	0.00021357805697791	0.0139521859378477	0.0153078562692132	0.987787844541023	-0.0271322038868099	0.0275593600007657
citations	PLoS Genet	PC5	0.0640395500874413	0.0155630595168663	4.1148432297672	4.00481725114809e-05	0.03353651394513	0.0945425862297526
citations	PLoS Genet	PC6	0.0517273735908565	0.0163592491105997	3.1619650291492	0.0015866059665236	0.0196638345199621	0.0837909126617509
citations	PLoS Genet	PC7	-0.0690592120219104	0.0177771522310433	-3.88471736779731	0.000105214448780349	-0.103901790142441	-0.0342166339013798
citations	PLoS Genet	PC8	-0.0709198157641921	0.0179747516477708	-3.94552409701792	8.19063763954405e-05	-0.106149681624875	-0.0356899499035094
citations	PLoS Genet	PC9	0.0436919032638715	0.0190235262769781	2.29672998726565	0.0217197435299522	0.00640647690204316	0.0809773296256998
citations	PLoS Genet	PC10	0.0375891772641625	0.0193450205670079	1.94309316622125	0.052121445688216	-0.000326366327359579	0.0755047208556846
citations	PLoS Genet	PC11	-0.0214962193987241	0.0201517879086346	-1.06671524612034	0.286207509033318	-0.0609929979237376	0.0180005591262894
citations	PLoS Genet	PC12	-0.0299825098565679	0.0204446977782502	-1.46651763610144	0.142638058785135	-0.0700533811767443	0.0100883614636086
citations	PLoS Genet	PC13	-0.00597858602868901	0.0207525641022964	-0.288089028383122	0.773303414869371	-0.0466528642560487	0.0346956921986706
citations	PLoS Genet	PC14	-0.0132692929779853	0.0211619433045305	-0.627035654856162	0.530695382442606	-0.0547459396977435	0.028207353741773
citations	PLoS Genet	PC15	0.0310387158797979	0.0214421532898645	1.44755591755188	0.147871623448797	-0.0109871323193236	0.0730645640789193
citations	PLoS Negl Trop Dis	(Intercept)	1.79116091283549	0.193746197480858	9.24488292479888	4.49426363337321e-20	1.41142534363143	2.17089648203956
citations	PLoS Negl Trop Dis	preprintTRUE	1.00056805876332	0.276673150783151	3.61642629915883	0.000303906192686893	0.458298647739129	1.54283746978752
citations	PLoS Negl Trop Dis	preprint_age	-0.444284761618564	0.570259966970892	-0.77909162022808	0.435990772571494	-1.56197375870651	0.673404235469386
citations	PLoS Negl Trop Dis	ns(pub_date, df = 3)1	-0.953359627279655	0.0768315087489253	-12.4084459983091	1.81615101148037e-34	-1.10394661730542	-0.802772637253888
citations	PLoS Negl Trop Dis	ns(pub_date, df = 3)2	-2.82481091598939	0.15454762902901	-18.2779311060097	1.21196673320576e-70	-3.1277187027823	-2.52190312919647
citations	PLoS Negl Trop Dis	ns(pub_date, df = 3)3	-2.96787730630596	0.0643816326661517	-46.0981988713422	0	-3.09406298759751	-2.84169162501442
citations	PLoS Negl Trop Dis	log2(authors)	0.251307926803276	0.0254396754469522	9.8785822691533	1.19166718488569e-22	0.201447079148862	0.30116877445769
citations	PLoS Negl Trop Dis	log2(references + 1)	0.235083204214623	0.0313724143644184	7.49330929662994	8.92274765146556e-14	0.173594401952296	0.29657200647695
citations	PLoS Negl Trop Dis	any_affil_usaTRUE	0.147869057878803	0.0386514449592886	3.82570581861953	0.000133211032295208	0.0721136178081653	0.223624497949441
citations	PLoS Negl Trop Dis	any_affil_nature_indexTRUE	0.0980177925263949	0.0386831724243683	2.53386127309065	0.0113347653613164	0.0222001677668801	0.17383541728591
citations	PLoS Negl Trop Dis	last_author_pub_age	0.00219307783045537	0.00232772007237428	0.942157030170053	0.346192525605192	-0.00236916967748918	0.00675532533839992
citations	PLoS Negl Trop Dis	PC1	-0.00426059588569018	0.0079102352365734	-0.538618101518788	0.590192682381675	-0.0197643720586137	0.0112431802872333
citations	PLoS Negl Trop Dis	PC2	-0.094400892078719	0.0127701169415719	-7.39232792547154	1.88901804005625e-13	-0.119429861362565	-0.0693719227948733
citations	PLoS Negl Trop Dis	PC3	0.0211085348616899	0.0137319061495777	1.53718898394445	0.124358630823518	-0.00580550663056653	0.0480225763539463
citations	PLoS Negl Trop Dis	PC4	-0.0118168089309521	0.0145935634616523	-0.809727450187426	0.418164793999565	-0.0404196677218904	0.0167860498599861
citations	PLoS Negl Trop Dis	PC5	0.0480618780804121	0.0156229182361786	3.07637007080491	0.00211537966543273	0.017441521004088	0.0786822351567361
citations	PLoS Negl Trop Dis	PC6	-0.0316264556221241	0.0162663422642463	-1.94428809552591	0.0519595110201487	-0.0635079006202486	0.000254989376000409
citations	PLoS Negl Trop Dis	PC7	0.00922095562800903	0.0172922136791726	0.533243215651162	0.593907028795494	-0.0246711603961402	0.0431130716521582
citations	PLoS Negl Trop Dis	PC8	0.0667698014014379	0.017837161464292	3.74329747113091	0.00018522837214345	0.0318096073449998	0.101729995457876
citations	PLoS Negl Trop Dis	PC9	0.0178444684281561	0.0183443245913261	0.97275145450673	0.330759833123246	-0.0181097470915556	0.0537986839478678
citations	PLoS Negl Trop Dis	PC10	0.0193768122606092	0.0196735516526791	0.984916836710084	0.324748969456386	-0.0191826404266304	0.0579362649478487
citations	PLoS Negl Trop Dis	PC11	-0.000916795125892854	0.0197552035941866	-0.0464077791717945	0.962988504938776	-0.0396362826777549	0.0378026924259692
citations	PLoS Negl Trop Dis	PC12	-0.0107323896300343	0.0200607682453384	-0.53499394932336	0.592695999266213	-0.0500507728931024	0.0285859936330338
citations	PLoS Negl Trop Dis	PC13	0.00760975033046379	0.0206920144504158	0.367762662678349	0.713077665074322	-0.0329458527599335	0.0481653534208611
citations	PLoS Negl Trop Dis	PC14	-0.0379904647091434	0.0215550337078117	-1.76248690788989	0.0780948068007781	-0.0802375544620012	0.00425662504371445
citations	PLoS Negl Trop Dis	PC15	0.0496110117696567	0.0217204496534737	2.28406927854381	0.0224410763348017	0.00703971272083282	0.0921823108184806
citations	PLoS Pathog	(Intercept)	3.60939679554404	0.30009126284425	12.0276637224768	2.74429468996638e-32	3.02122872829417	4.19756486279392
citations	PLoS Pathog	preprintTRUE	0.508429235740681	0.226080537509737	2.24888546949241	0.0246214036391386	0.0653195246161407	0.951538946865221
citations	PLoS Pathog	preprint_age	-0.180795360748923	0.436916749797009	-0.413798191149505	0.679063490758018	-1.03713645459336	0.675545733095512
citations	PLoS Pathog	ns(pub_date, df = 3)1	-0.857268778284956	0.0887259074377786	-9.66198941257534	1.20475120260923e-21	-1.03116836135864	-0.683369195211276
citations	PLoS Pathog	ns(pub_date, df = 3)2	-2.77487801516486	0.173844735078214	-15.9618179631176	2.87188189882229e-54	-3.11560743482006	-2.43414859550965
citations	PLoS Pathog	ns(pub_date, df = 3)3	-3.03240847658761	0.0838219512572489	-36.176782228335	6.57631132865914e-224	-3.19669648216569	-2.86812047100953
citations	PLoS Pathog	log2(authors)	0.153260854681422	0.0268221574646177	5.71396446701184	1.2583789949732e-08	0.100690392063109	0.205831317299735
citations	PLoS Pathog	log2(references + 1)	0.0831771148400678	0.0477459818600624	1.74207570144541	0.0816392694652051	-0.0104032900121571	0.176757519692293
citations	PLoS Pathog	any_affil_usaTRUE	0.130974203280639	0.0429075166498734	3.05247689698269	0.00229760664098015	0.0468770159808342	0.215071390580444
citations	PLoS Pathog	any_affil_nature_indexTRUE	0.077583089491477	0.0462640576174641	1.67696249501017	0.0936962730631101	-0.0130927972174387	0.168258976200393
citations	PLoS Pathog	last_author_pub_age	-0.000592659573403536	0.0025678392202583	-0.23080088843877	0.81749161525354	-0.00562553196319923	0.00444021281639215
citations	PLoS Pathog	PC1	0.0196659499786292	0.0112202618625544	1.75271755860358	0.0797940928916301	-0.00232535916908578	0.0416572591263441
citations	PLoS Pathog	PC2	-0.0358397753854746	0.0142321641123513	-2.51822386971855	0.0118674517586553	-0.0637343044677465	-0.0079452463032027
citations	PLoS Pathog	PC3	-0.0340522436842582	0.0151420001002997	-2.2488603525755	0.0246230047962467	-0.0637300185347476	-0.00437446883376891
citations	PLoS Pathog	PC4	-0.00983271368727676	0.0159325892015547	-0.617144744202484	0.537205097336107	-0.0410600147027958	0.0213945873282423
citations	PLoS Pathog	PC5	0.00827925313585944	0.0177755977937238	0.465765102920064	0.641431178233964	-0.0265602783435089	0.0431187846152278
citations	PLoS Pathog	PC6	-0.0139898253073706	0.0182866409415796	-0.76502980246968	0.444338391688093	-0.0498309829510822	0.021851332336341
citations	PLoS Pathog	PC7	0.0312100305438389	0.0184956617286338	1.68742438101156	0.0916679164971017	-0.00504080031451905	0.0674608614021969
citations	PLoS Pathog	PC8	-0.0269573566654213	0.0196306257587198	-1.3732296156401	0.169825237235794	-0.0654326761464963	0.0115179628156537
citations	PLoS Pathog	PC9	0.00573726986782867	0.0196470201500247	0.292017304610006	0.770301778213259	-0.0327701820297524	0.0442447217654097
citations	PLoS Pathog	PC10	0.0579568020394849	0.0200205612553319	2.89486400008141	0.00383176656297257	0.0187172230287564	0.0971963810502134
citations	PLoS Pathog	PC11	0.0370591173620772	0.020363387337497	1.81988962582059	0.0689158520767925	-0.00285238842265586	0.0769706231468102
citations	PLoS Pathog	PC12	-0.0401319332419731	0.0205677416972347	-1.95120756730277	0.051163045745719	-0.0804439662118759	0.000180099727929685
citations	PLoS Pathog	PC13	-0.0316111658963671	0.021122490733578	-1.49656431597413	0.134654537767134	-0.0730104869979609	0.00978815520522678
citations	PLoS Pathog	PC14	0.0689164786989392	0.0212417963945353	3.24438090917154	0.00119524929646861	0.0272833227987173	0.110549634599161
citations	PLoS Pathog	PC15	0.026057723322269	0.0214631603866423	1.21406739980782	0.224856325973507	-0.0160092980299566	0.0681247446744946
citations	Syst Biol	(Intercept)	2.5594663526302	0.606647276442568	4.21903542968022	3.552954098447e-05	1.37045953948346	3.74847316577695
citations	Syst Biol	preprintTRUE	0.862493008122041	0.460185616777191	1.87422852144385	0.0621891248120934	-0.0394542269646049	1.76444024320869
citations	Syst Biol	preprint_age	-0.233580712164295	0.622774786868539	-0.375064496972966	0.707964240127124	-1.45419686490624	0.987035440577649
citations	Syst Biol	ns(pub_date, df = 3)1	-2.72279048440599	0.429015404338685	-6.34660307501802	1.18998959170152e-09	-3.5636452257227	-1.88193574308928
citations	Syst Biol	ns(pub_date, df = 3)2	-2.23158924634314	0.845297498815874	-2.64000455398157	0.00886817617150568	-3.88834190024404	-0.574836592442235
citations	Syst Biol	ns(pub_date, df = 3)3	-1.76918702328528	0.471144879438174	-3.75508065670793	0.000220458168638048	-2.69261401848457	-0.845760028085992
citations	Syst Biol	log2(authors)	0.176436926044646	0.104207940131218	1.69312363167794	0.0918098350881157	-0.027806883515648	0.38068073560494
citations	Syst Biol	log2(references + 1)	0.248043856429565	0.0743781439975529	3.33490247400803	0.000997237637371172	0.102265372957427	0.393822339901702
citations	Syst Biol	any_affil_usaTRUE	0.351223977170216	0.197818974036702	1.77548174476454	0.0771641196833634	-0.0364940874003842	0.738942041740817
citations	Syst Biol	any_affil_nature_indexTRUE	0.16119813422845	0.195437170507589	0.824807961606211	0.410350329207386	-0.221851681206838	0.544247949663737
citations	Syst Biol	last_author_pub_age	0.0111131189750982	0.0174562857907055	0.636625632069759	0.525013002242205	-0.0231005724785228	0.0453268104287192
citations	Syst Biol	PC1	0.0417555931964057	0.0676153785885443	0.617545801976477	0.5374965104722	-0.0907681136381818	0.174279300030993
citations	Syst Biol	PC2	0.0964881611689605	0.0715869953739956	1.34784482383808	0.17905779464623	-0.0438197715255062	0.236796093863427
citations	Syst Biol	PC3	0.0302032482458943	0.072462428097362	0.416812533597586	0.677211153439264	-0.111820501057258	0.172226997549047
citations	Syst Biol	PC4	0.0237459963082459	0.0785851301493684	0.302169077828228	0.762801071441792	-0.130278028504909	0.177770021121401
citations	Syst Biol	PC5	-0.0821481780678792	0.0835237864892801	-0.983530339329415	0.326398229690718	-0.245851791439281	0.0815554353035228
citations	Syst Biol	PC6	0.00703590939162829	0.0815032274866017	0.0863267579530506	0.931283101028441	-0.152707481105886	0.166779299889143
citations	Syst Biol	PC7	0.125075840439197	0.0876225066442856	1.42743965254222	0.154833452767623	-0.046661116818724	0.296812797697119
citations	Syst Biol	PC8	0.00484723147083165	0.0871090142168857	0.0556455782952947	0.955673316609557	-0.165883299123052	0.175577762064715
citations	Syst Biol	PC9	-0.0017758773476739	0.0945141802200667	-0.0187895334175142	0.985025581109529	-0.187020266607333	0.183468511911985
citations	Syst Biol	PC10	-0.106202483440478	0.0958919922415378	-1.10752192083954	0.269245687626049	-0.294147334639686	0.0817423677587304
citations	Syst Biol	PC11	-0.127244806334157	0.0979785746848364	-1.29870032038596	0.195370330581989	-0.319279283973004	0.06478967130469
citations	Syst Biol	PC12	0.103139355613628	0.100848493330266	1.02271588010601	0.307535674876041	-0.0945200592088213	0.300798770436077
citations	Syst Biol	PC13	0.107940067107596	0.103204367849988	1.04588661658673	0.296730711481372	-0.0943367769256036	0.310216911140796
citations	Syst Biol	PC14	0.0961795784279671	0.107076580912931	0.898231691822277	0.370017982991868	-0.113686663749067	0.306045820605001
citations	Syst Biol	PC15	-0.138216582809995	0.112517361764789	-1.22840227181054	0.220573675681755	-0.358746559504446	0.0823133938844556
citations	eNeuro	(Intercept)	2.10547471907996	0.444063223214927	4.74138503034939	2.5854070519991e-06	1.23512679471993	2.97582264343998
citations	eNeuro	preprintTRUE	0.291414357067882	0.332095349655721	0.87750207092628	0.380523002384359	-0.359480567690567	0.942309281826331
citations	eNeuro	preprint_age	-0.174472079473251	0.451786287789476	-0.386182768686754	0.699481758536945	-1.05995693224967	0.71101277330317
citations	eNeuro	ns(pub_date, df = 3)1	-1.42394444939993	0.171597654749989	-8.29815798750021	5.65700396282008e-16	-1.76026967254144	-1.08761922625841
citations	eNeuro	ns(pub_date, df = 3)2	-3.13249836108424	0.430432771438378	-7.27755544870891	9.37980849036706e-13	-3.97613109086922	-2.28886563129926
citations	eNeuro	ns(pub_date, df = 3)3	-1.97375786302937	0.163234304378789	-12.0915629257023	1.24127517086699e-30	-2.29369122065325	-1.6538245054055
citations	eNeuro	log2(authors)	0.229280544717874	0.0555659294277682	4.1262793060255	4.14278592649599e-05	0.120373324271954	0.338187765163794
citations	eNeuro	log2(references + 1)	0.167962864333547	0.0662501255701587	2.53528371286897	0.0114579106061613	0.0381150042447802	0.297810724422314
citations	eNeuro	any_affil_usaTRUE	0.0506209629668396	0.0893408952531792	0.566604608375449	0.57116925527587	-0.124483974075957	0.225725900009636
citations	eNeuro	any_affil_nature_indexTRUE	0.0635421135012442	0.0889233049307661	0.714572108523371	0.475117993001975	-0.11074436154933	0.237828588551819
citations	eNeuro	last_author_pub_age	0.00519147447723056	0.00502104695719984	1.03394262620594	0.301529473518265	-0.00464959672356554	0.0150325456780267
citations	eNeuro	PC1	-0.0139011651990799	0.0182096507526056	-0.763395486708649	0.445491560599411	-0.0495914248452395	0.0217890944470798
citations	eNeuro	PC2	-0.0275417277031555	0.0311438006156578	-0.88434061221509	0.376824023274173	-0.0885824552515412	0.0334989998452302
citations	eNeuro	PC3	0.071292170786686	0.0296515210980602	2.40433435272735	0.0164675939759777	0.0131762573476585	0.129408084225713
citations	eNeuro	PC4	-0.00257475787476271	0.0326389449633688	-0.0788860631877778	0.937146388416947	-0.0665459144963505	0.0613963987468251
citations	eNeuro	PC5	-0.0566637755856974	0.0341188685702486	-1.66077534104129	0.0972181997329781	-0.12353552917664	0.0102079780052454
citations	eNeuro	PC6	-0.00208570229754101	0.0353543504667408	-0.0589942190990924	0.952973993961167	-0.0713789559091599	0.0672075513140779
citations	eNeuro	PC7	0.0124394278426352	0.036732939256403	0.338645044323996	0.734981376996398	-0.0595558101462121	0.0844346658314826
citations	eNeuro	PC8	-0.073262642391832	0.0374284761651811	-1.95740382452403	0.0507074894647913	-0.146621107671803	9.58228881387663e-05
citations	eNeuro	PC9	-0.0369605013204972	0.0376911091621905	-0.980615910278752	0.327129913014486	-0.110833717815758	0.0369127151747637
citations	eNeuro	PC10	-0.00414716044936504	0.0389509386997016	-0.10647138651364	0.915239666530621	-0.0804895974648077	0.0721952765660776
citations	eNeuro	PC11	0.0212884012562834	0.0388794531635549	0.547548885698807	0.584180834710388	-0.0549139266828961	0.097490729195463
citations	eNeuro	PC12	-0.0332541788844411	0.0394887347537705	-0.842118115249714	0.40001704451942	-0.110650676796886	0.0441423190280042
citations	eNeuro	PC13	-0.0116545740314111	0.0395721380021603	-0.294514641356373	0.768454297615513	-0.089214539306894	0.0659053912440718
citations	eNeuro	PC14	-0.00299053615177018	0.0402383767400479	-0.0743204968503065	0.940777161006933	-0.0818563053586183	0.0758752330550779
citations	eNeuro	PC15	0.069001500183732	0.0414363523487411	1.66524069500602	0.0963240062604492	-0.0122122580705123	0.150215258437976
Attention Score	Am J Hum Genet	(Intercept)	1.0363169839792	0.718296323106318	1.44274298871193	0.149554015689552	-0.371517939536731	2.44415190749513
Attention Score	Am J Hum Genet	preprintTRUE	0.596324075606154	0.475689423075752	1.25359961075105	0.210419029388436	-0.336010061448957	1.52865821266126
Attention Score	Am J Hum Genet	preprint_age	0.0587714357134856	0.700774231060572	0.0838664338791955	0.933187346604795	-1.31472081845899	1.43226368988596
Attention Score	Am J Hum Genet	ns(pub_date, df = 3)1	0.620443233058072	0.322018601783254	1.92673103237584	0.054430170551829	-0.0107016287890502	1.25158809490519
Attention Score	Am J Hum Genet	ns(pub_date, df = 3)2	0.535969781207054	0.598524395226765	0.895485272582731	0.370845072615987	-0.637116477306023	1.70905603972013
Attention Score	Am J Hum Genet	ns(pub_date, df = 3)3	0.0394268186502573	0.261462969242397	0.150793126707383	0.880183693865138	-0.473031184355745	0.551884821656259
Attention Score	Am J Hum Genet	log2(authors)	0.109254576955127	0.0678650706940845	1.6098793655961	0.107888968635983	-0.0237585174135433	0.242267671323797
Attention Score	Am J Hum Genet	log2(references + 1)	0.377404629081355	0.124147592082176	3.03996737070457	0.00245701806681518	0.134079819832921	0.620729438329789
Attention Score	Am J Hum Genet	any_affil_usaTRUE	0.0209201536596961	0.165728011717525	0.126231850867514	0.899585768011952	-0.303900780536084	0.345741087855476
Attention Score	Am J Hum Genet	any_affil_nature_indexTRUE	0.0970606300613105	0.237750699829205	0.408245402141977	0.683222223468907	-0.368922178903125	0.563043439025746
Attention Score	Am J Hum Genet	last_author_pub_age	-0.0143179000872397	0.0090191221392303	-1.5875048442865	0.112863882559124	-0.0319950546522989	0.00335925447781952
Attention Score	Am J Hum Genet	PC1	-0.0868549460993227	0.0365541069815667	-2.37606532538523	0.0177748057220041	-0.158499679270217	-0.0152102129284279
Attention Score	Am J Hum Genet	PC2	-0.0170004167634478	0.044155405772179	-0.385013260916724	0.700348160238457	-0.103543421799671	0.069542588272775
Attention Score	Am J Hum Genet	PC3	-0.0255669206246718	0.0457113497912542	-0.559312309556071	0.57613302867217	-0.115159519900243	0.0640256786508989
Attention Score	Am J Hum Genet	PC4	-0.113547625594712	0.0481474112249472	-2.35833293433393	0.0186397120253727	-0.207914817544448	-0.0191804336449761
Attention Score	Am J Hum Genet	PC5	0.0271436239815326	0.0532892497795156	0.509363972918355	0.610662617763941	-0.077301386349477	0.131588634312542
Attention Score	Am J Hum Genet	PC6	-0.133039944160485	0.054940388717673	-2.42153263319903	0.015716210828566	-0.240721127343755	-0.0253587609772149
Attention Score	Am J Hum Genet	PC7	-0.0965337807017948	0.0593036300129275	-1.62778873200092	0.104033586452678	-0.212766759679621	0.0196991982760317
Attention Score	Am J Hum Genet	PC8	-0.107677198439283	0.0597820124096903	-1.8011638300391	0.0721206194668511	-0.224847789685602	0.00949339280703668
Attention Score	Am J Hum Genet	PC9	-0.025715670682673	0.060252746565353	-0.426796654900711	0.66966273081574	-0.143808883920384	0.0923775425550384
Attention Score	Am J Hum Genet	PC10	-0.1226301856688	0.0620011268719737	-1.97787027197133	0.0483472300011699	-0.244150161338766	-0.00111020999883257
Attention Score	Am J Hum Genet	PC11	-0.0371754086123226	0.0620589706768222	-0.599033599927349	0.549350280664541	-0.158808756056521	0.0844579388318762
Attention Score	Am J Hum Genet	PC12	0.0581641832349865	0.0639684805374352	0.909263167521198	0.363533856955336	-0.0672117347641379	0.183540101234111
Attention Score	Am J Hum Genet	PC13	-0.0648116151664904	0.0641978877298911	-1.00955993192769	0.313065794839588	-0.190637163000623	0.0610139326676419
Attention Score	Am J Hum Genet	PC14	-0.0158703074979106	0.0656443346391832	-0.241762028439201	0.809037558018729	-0.144530839179805	0.112790224183983
Attention Score	Am J Hum Genet	PC15	0.0137417127824716	0.0663119373960665	0.207228341111427	0.835893666280941	-0.116227296258893	0.143710721823837
Attention Score	BMC Bioinformatics	(Intercept)	0.927124023402083	0.238258058699019	3.8912598737039	0.000102853093000435	0.460146809325575	1.39410123747859
Attention Score	BMC Bioinformatics	preprintTRUE	0.466414140718881	0.205504808830563	2.2696020758494	0.0233334086379285	0.0636321167611885	0.869196164676574
Attention Score	BMC Bioinformatics	preprint_age	0.0212038968176575	0.264931024194012	0.0800355371069326	0.936216669323182	-0.498051368989915	0.54045916262523
Attention Score	BMC Bioinformatics	ns(pub_date, df = 3)1	-0.431120130568133	0.11292627647435	-3.81771314903894	0.00013862251585079	-0.652451565366073	-0.209788695770194
Attention Score	BMC Bioinformatics	ns(pub_date, df = 3)2	-0.672513854723542	0.240691255455934	-2.79409342665823	0.00525211212786382	-1.1442600468109	-0.200767662636182
Attention Score	BMC Bioinformatics	ns(pub_date, df = 3)3	-0.557131738255377	0.0913753231999715	-6.09717939969542	1.28271581493871e-09	-0.736224080803028	-0.378039395707726
Attention Score	BMC Bioinformatics	log2(authors)	0.0218867231218825	0.0351693533208696	0.622323729475426	0.53379703730946	-0.0470439427465861	0.0908173889903512
Attention Score	BMC Bioinformatics	log2(references + 1)	0.135149075326836	0.0407394841333438	3.31739780711218	0.000924205176126981	0.0553011536767416	0.214996996976931
Attention Score	BMC Bioinformatics	any_affil_usaTRUE	0.145560003843362	0.0580278013899746	2.50845285116232	0.0122014492504705	0.0318276030169689	0.259292404669756
Attention Score	BMC Bioinformatics	any_affil_nature_indexTRUE	0.348379039367106	0.0581972834991906	5.98617355347782	2.5225582335173e-09	0.234314459710625	0.462443619023586
Attention Score	BMC Bioinformatics	last_author_pub_age	0.00432068408113941	0.00451545915861769	0.956864834641113	0.338746361842505	-0.00452945324341279	0.0131708214056916
Attention Score	BMC Bioinformatics	PC1	0.250852814755996	0.0188995506153537	13.2729512918793	1.17177702960209e-38	0.213810376225911	0.287895253286081
Attention Score	BMC Bioinformatics	PC2	-0.0905608206666926	0.0198532140192502	-4.56151938818986	5.37325316829879e-06	-0.129472405121789	-0.0516492362115965
Attention Score	BMC Bioinformatics	PC3	0.114381573813763	0.020381146706169	5.61212651391898	2.26488649942901e-08	0.074435260306045	0.154327887321482
Attention Score	BMC Bioinformatics	PC4	-0.0995178650815242	0.0216972760034914	-4.58665249340564	4.77123205549095e-06	-0.142043744610993	-0.056991985552056
Attention Score	BMC Bioinformatics	PC5	-0.0370091551183147	0.0231024435920581	-1.6019584668973	0.109316200905208	-0.0822891125136168	0.00827080227698736
Attention Score	BMC Bioinformatics	PC6	0.0637349311961527	0.024351144116384	2.61732799459186	0.00892615081723753	0.0160075657456956	0.11146229664661
Attention Score	BMC Bioinformatics	PC7	0.0865508825281301	0.0245622124037543	3.52374131065249	0.000434659999109235	0.0384098308361486	0.134691934220112
Attention Score	BMC Bioinformatics	PC8	-0.0284041057352471	0.0247879344080851	-1.1458843350006	0.25197444862722	-0.0769875644262351	0.0201793529557409
Attention Score	BMC Bioinformatics	PC9	-0.0185659628675404	0.0256557423027251	-0.723657208919205	0.469357350099594	-0.0688502937775224	0.0317183680424415
Attention Score	BMC Bioinformatics	PC10	-0.0712838119914694	0.0257664876968497	-2.76653197091293	0.00571556241207479	-0.121785199885389	-0.0207824240975497
Attention Score	BMC Bioinformatics	PC11	0.0260998276360363	0.0260900347160386	1.00037535097612	0.317244921149377	-0.025035700762799	0.0772353560348717
Attention Score	BMC Bioinformatics	PC12	-0.0345207039400398	0.0265627322283933	-1.29959160989999	0.193884575495591	-0.086582702438672	0.0175412945585924
Attention Score	BMC Bioinformatics	PC13	0.0579198357098305	0.0272239313596464	2.12753385779117	0.0334927443511696	0.00456191072733307	0.111277760692328
Attention Score	BMC Bioinformatics	PC14	0.0820077941256029	0.0273929872377265	2.99375140848674	0.00278808590955831	0.0283185257106936	0.135697062540512
Attention Score	BMC Bioinformatics	PC15	0.0667170935314409	0.0280099131105352	2.38191004977973	0.017312277916198	0.0118186726246957	0.121615514438186
Attention Score	BMC Genomics	(Intercept)	0.392073099345445	0.214206661279497	1.83034970529637	0.0672709515778389	-0.0277642420109387	0.811910440701829
Attention Score	BMC Genomics	preprintTRUE	0.974701785695469	0.178567918390339	5.45843729647353	5.09036275228434e-08	0.624715096856116	1.32468847453482
Attention Score	BMC Genomics	preprint_age	-0.340106585289806	0.252471637928893	-1.34710808738681	0.178020622695771	-0.834941902748274	0.154728732168662
Attention Score	BMC Genomics	ns(pub_date, df = 3)1	-0.136221973034339	0.0842293477594521	-1.61727446143084	0.105896753618097	-0.301308461084165	0.0288645150154865
Attention Score	BMC Genomics	ns(pub_date, df = 3)2	0.355753786309809	0.184555347274209	1.92762654436252	0.0539712901559155	-0.00596804750192298	0.717475620121541
Attention Score	BMC Genomics	ns(pub_date, df = 3)3	-0.444639358770945	0.0696220204911707	-6.38647594014215	1.88871814944121e-10	-0.581096011464549	-0.308182706077341
Attention Score	BMC Genomics	log2(authors)	0.0334333828201269	0.0250953505843738	1.33225406466108	0.182851507756992	-0.015752600504652	0.0826193661449058
Attention Score	BMC Genomics	log2(references + 1)	0.108948391886647	0.0334884900743955	3.25330857391943	0.00115003667024295	0.0433121574442045	0.174584626329089
Attention Score	BMC Genomics	any_affil_usaTRUE	0.246471107983255	0.041453007249696	5.94579559689394	2.98275106141339e-09	0.165224706722973	0.327717509243537
Attention Score	BMC Genomics	any_affil_nature_indexTRUE	0.30269827279635	0.0409535806581071	7.39125292421599	1.75679608425769e-13	0.222430729668504	0.382965815924196
Attention Score	BMC Genomics	last_author_pub_age	0.00111768187603728	0.00272915416298247	0.409534166738261	0.682169308340717	-0.00423136199166592	0.00646672574374048
Attention Score	BMC Genomics	PC1	0.00295831486312668	0.0113437812216686	0.260787369336406	0.794269714720235	-0.0192750877798456	0.0251917175060989
Attention Score	BMC Genomics	PC2	0.144959730396041	0.0136941179283531	10.5855471052946	7.53271087577759e-26	0.118119752456424	0.171799708335657
Attention Score	BMC Genomics	PC3	-0.000336894382080604	0.0135265757139597	-0.0249061099575203	0.980131078006682	-0.0268484956155958	0.0261747068514346
Attention Score	BMC Genomics	PC4	0.0540220572416807	0.0147518565716065	3.66205141566107	0.000253392331642257	0.0251089496562314	0.0829351648271299
Attention Score	BMC Genomics	PC5	0.0138498190130781	0.0154235916634599	0.897963283473707	0.369258384240489	-0.0163798651595554	0.0440795031857116
Attention Score	BMC Genomics	PC6	-0.0831528621776397	0.0170594533573528	-4.87429816394438	1.13369052787431e-06	-0.116588776353992	-0.0497169480012872
Attention Score	BMC Genomics	PC7	-0.0207885661471638	0.0175615970609887	-1.18375145921913	0.23658078116428	-0.0552086638977061	0.0136315316033786
Attention Score	BMC Genomics	PC8	0.02443814764931	0.0175994981950356	1.3885707068741	0.165039521343551	-0.0100562349589375	0.0589325302575575
Attention Score	BMC Genomics	PC9	0.0690777648697655	0.0182577102292474	3.78348456637835	0.000156877245586262	0.0332933103802721	0.104862219359259
Attention Score	BMC Genomics	PC10	-0.0207186288633784	0.0187785963673781	-1.10331083633974	0.269957608991605	-0.0575240014236542	0.0160867436968975
Attention Score	BMC Genomics	PC11	0.0220763106610595	0.0189846722385588	1.16284918610401	0.244959057118818	-0.0151329631848132	0.0592855845069321
Attention Score	BMC Genomics	PC12	-0.0105007434731092	0.019588544492081	-0.536065529389091	0.591942636462562	-0.0488935851871483	0.02789209824093
Attention Score	BMC Genomics	PC13	-0.070282831986823	0.0196288120930483	-3.58059528277385	0.000346826681883217	-0.108754596748502	-0.0318110672251441
Attention Score	BMC Genomics	PC14	0.0740774166964314	0.0201302419009262	3.67990693112452	0.000236347639357123	0.034622867570537	0.113531965822326
Attention Score	BMC Genomics	PC15	0.0220188048927698	0.0201871372885976	1.09073439081463	0.275454516796468	-0.0175472571438471	0.0615848669293868
Attention Score	Bioinformatics	(Intercept)	2.52691773491689	0.160493118759232	15.7447107667446	2.04333837883122e-53	2.21235700238228	2.84147846745149
Attention Score	Bioinformatics	preprintTRUE	0.696825034486488	0.158668375268864	4.39170712692884	1.16969694526631e-05	0.385840733474029	1.00780933549895
Attention Score	Bioinformatics	preprint_age	-0.078628996937646	0.244673915690733	-0.321362400710638	0.747961643591361	-0.558181059647871	0.400923065772579
Attention Score	Bioinformatics	ns(pub_date, df = 3)1	-2.07790105170344	0.11931942440928	-17.4146084092392	2.51555740427508e-64	-2.31176282620168	-1.8440392772052
Attention Score	Bioinformatics	ns(pub_date, df = 3)2	0.42296765701257	0.241151377375356	1.75395082381891	0.0795569247685992	-0.0496803574653553	0.895615671490496
Attention Score	Bioinformatics	ns(pub_date, df = 3)3	-0.0703300147635161	0.142209505652564	-0.49455213588423	0.620958143835706	-0.349055524101787	0.208395494574755
Attention Score	Bioinformatics	log2(authors)	0.0798068082697335	0.0344536878755093	2.31635024262418	0.0206166645623121	0.012278820899151	0.147334795640316
Attention Score	Bioinformatics	log2(references + 1)	-0.0233134122409586	0.0258931855893971	-0.900368637936352	0.368007619416186	-0.0740631234411884	0.0274362989592712
Attention Score	Bioinformatics	any_affil_usaTRUE	-0.0138118770845559	0.0547617245600532	-0.252217715850227	0.800892751747235	-0.121142884953563	0.0935191307844508
Attention Score	Bioinformatics	any_affil_nature_indexTRUE	0.0767467796343205	0.0545030900917721	1.40811795267194	0.159215885943352	-0.0300773139916947	0.183570873260336
Attention Score	Bioinformatics	last_author_pub_age	-0.00927191893454928	0.0041567509626985	-2.23056878262683	0.0257948506274448	-0.0174190011141405	-0.00112483675495803
Attention Score	Bioinformatics	PC1	0.155315083834112	0.0186269323579813	8.33819980924355	1.20746246594417e-16	0.118806967270005	0.191823200398219
Attention Score	Bioinformatics	PC2	0.0264407811388467	0.0210289381659636	1.25735217490165	0.208739240529006	-0.0147751802995618	0.0676567425772552
Attention Score	Bioinformatics	PC3	-0.124956571834486	0.0229905953529832	-5.43511683433948	5.98568982935182e-08	-0.170017310709467	-0.0798958329595049
Attention Score	Bioinformatics	PC4	0.0294137191401555	0.0234006667404505	1.2569607296407	0.208880934982264	-0.0164507448853518	0.0752781831656628
Attention Score	Bioinformatics	PC5	0.0397234836207899	0.0241601883653338	1.64417110579267	0.100261946075276	-0.00762961543496787	0.0870765826765477
Attention Score	Bioinformatics	PC6	0.0583483938106969	0.0256066875692623	2.27863887716337	0.0227694229426736	0.00816020841157341	0.10853657920982
Attention Score	Bioinformatics	PC7	1.93724684157559e-05	0.025611272288027	0.000756403984850544	0.999396535114005	-0.0501777988143658	0.0502165437511973
Attention Score	Bioinformatics	PC8	0.00204334328514246	0.026549213003567	0.0769643636844499	0.938657825436451	-0.0499921580197313	0.0540788445900162
Attention Score	Bioinformatics	PC9	-0.0430975330229472	0.0274018383545105	-1.57279714103025	0.115887657100178	-0.0968041493079761	0.0106090832620816
Attention Score	Bioinformatics	PC10	-0.0242252099040425	0.0278094760333836	-0.871113496527645	0.383772734263971	-0.0787307813584042	0.0302803615503191
Attention Score	Bioinformatics	PC11	0.0550833300730546	0.0281038504319064	1.95999228669814	0.0501035219706165	7.95399617732617e-07	0.110165864746491
Attention Score	Bioinformatics	PC12	0.0354021066796204	0.028588108968512	1.23835076739821	0.21569799659849	-0.0206295572847697	0.0914337706440104
Attention Score	Bioinformatics	PC13	0.0041745194726399	0.0292947851396625	0.142500429777448	0.886695798301048	-0.0532422043359378	0.0615912432812176
Attention Score	Bioinformatics	PC14	-0.108853904263031	0.0299155144795407	-3.63871075449754	0.000279348697798727	-0.167487235221918	-0.0502205733041452
Attention Score	Bioinformatics	PC15	0.0479993297687222	0.0305113482256494	1.57316318550524	0.115802895148566	-0.0118018138733107	0.107800473410755
Attention Score	Biophys J	(Intercept)	0.650009883749924	0.348664322475951	1.86428562330107	0.062438857086349	-0.0333596309970002	1.33337939849685
Attention Score	Biophys J	preprintTRUE	0.780260021262646	0.283190030841703	2.75525243223973	0.00592178889648082	0.225217760032122	1.33530228249317
Attention Score	Biophys J	preprint_age	0.0254811034983929	0.503273187681686	0.0506307590431569	0.959625182591361	-0.960916218742379	1.01187842573916
Attention Score	Biophys J	ns(pub_date, df = 3)1	0.974019114055755	0.138103068103201	7.05284196385769	2.4615892901094e-12	0.703342074418998	1.24469615369251
Attention Score	Biophys J	ns(pub_date, df = 3)2	1.00438722316889	0.262064103797851	3.83260129339821	0.000131004977038033	0.490751018084332	1.51802342825344
Attention Score	Biophys J	ns(pub_date, df = 3)3	-0.109813779704959	0.12565855788744	-0.873906095622441	0.382282089193091	-0.356100027513584	0.136472468103665
Attention Score	Biophys J	log2(authors)	0.163277203785242	0.0433532583118653	3.7662037443805	0.000170896577042217	0.0783063788815246	0.24824802868896
Attention Score	Biophys J	log2(references + 1)	-0.0817814549977067	0.0573500206403286	-1.42600567680002	0.154034330135721	-0.194185429965379	0.030622519969966
Attention Score	Biophys J	any_affil_usaTRUE	0.225943275937365	0.0637582289101205	3.54375081930014	0.00040420549565227	0.100979443555469	0.350907108319262
Attention Score	Biophys J	any_affil_nature_indexTRUE	0.0906592076644928	0.0650359086997106	1.39398694470608	0.163487873689967	-0.0368088310887751	0.218127246417761
Attention Score	Biophys J	last_author_pub_age	-0.00484316868641112	0.00401210664803052	-1.20713857115153	0.227532106329311	-0.0127067532186847	0.00302041584586242
Attention Score	Biophys J	PC1	-0.055157111313883	0.0202791362154998	-2.71989451265312	0.00659096434405067	-0.0949034879338445	-0.0154107346939215
Attention Score	Biophys J	PC2	-0.016554635611844	0.0236979534284577	-0.698568155339707	0.484909187505164	-0.0630017708389287	0.0298924996152407
Attention Score	Biophys J	PC3	0.0431037245263051	0.0253019819944808	1.70357106948015	0.0886281140604095	-0.00648724892035823	0.0926946979729685
Attention Score	Biophys J	PC4	0.0457998245723737	0.0262769485833431	1.74296587090809	0.0815046484238302	-0.00570204827458964	0.097301697419337
Attention Score	Biophys J	PC5	0.0371725233370555	0.0278511628334456	1.33468478710757	0.18214271113552	-0.0174147527440583	0.0917597994181693
Attention Score	Biophys J	PC6	0.0426219022281156	0.0279022203639048	1.52754517999767	0.126795344805586	-0.0120654447738379	0.0973092492300691
Attention Score	Biophys J	PC7	0.0110870157096853	0.0292231700088143	0.379391274332704	0.70444059068366	-0.0461893450216817	0.0683633764410523
Attention Score	Biophys J	PC8	0.0361132645491516	0.0294590353414309	1.22588075714625	0.220398569798026	-0.0216253837393456	0.0938519128376489
Attention Score	Biophys J	PC9	-0.0895606885659785	0.0300810170876497	-2.97731583692857	0.00294537309942594	-0.148518398676106	-0.0306029784558511
Attention Score	Biophys J	PC10	-0.0374261952170196	0.0303878261261428	-1.23161805196791	0.21824731568401	-0.0969852399927247	0.0221328495586856
Attention Score	Biophys J	PC11	0.0447295759005515	0.0311646465766141	1.43526658614882	0.151379094960017	-0.0163520089805315	0.105811160781635
Attention Score	Biophys J	PC12	0.0336451005828192	0.0322282381903701	1.04396338341798	0.296637844635679	-0.0295210855554846	0.096811286721123
Attention Score	Biophys J	PC13	0.0145673969346372	0.0321119256449337	0.453644452709286	0.650137617936167	-0.048370820803661	0.0775056146729355
Attention Score	Biophys J	PC14	0.031715187988209	0.0328957214597068	0.964112856653903	0.335114540011424	-0.0327592413182777	0.0961896172946957
Attention Score	Biophys J	PC15	0.0108149612072951	0.033370290506721	0.324089513248824	0.7459066660589	-0.054589606339517	0.0762195287541071
Attention Score	Cell	(Intercept)	3.06604846637888	0.643362325604857	4.76566367714542	2.06941197660635e-06	1.80508147918342	4.32701545357433
Attention Score	Cell	preprintTRUE	-0.393755929541692	0.413474300784986	-0.952310527629266	0.341096716794774	-1.20415066761315	0.416638808529762
Attention Score	Cell	preprint_age	0.861932643087836	0.681059851346863	1.2655754723807	0.205866485107314	-0.472920136868219	2.19678542304389
Attention Score	Cell	ns(pub_date, df = 3)1	1.13048617558158	0.188464514076198	5.99840336586928	2.50677065080233e-09	0.761102515628394	1.49986983553477
Attention Score	Cell	ns(pub_date, df = 3)2	1.214182458524	0.373285973332199	3.25268706907308	0.00116924066339173	0.482555394858914	1.94580952218909
Attention Score	Cell	ns(pub_date, df = 3)3	0.946145919685132	0.155469003196922	6.0857527882051	1.47795514625672e-09	0.641432272706823	1.25085956666344
Attention Score	Cell	log2(authors)	0.323705904702791	0.0435956169147517	7.42519380642729	1.90320412628945e-13	0.238260065666073	0.40915174373951
Attention Score	Cell	log2(references + 1)	0.244375418350991	0.103847193156711	2.35322121785435	0.0187432126058242	0.0408386598682632	0.447912176833718
Attention Score	Cell	any_affil_usaTRUE	0.213589292902637	0.108374942653357	1.97083650217757	0.048930711188992	0.00117830847546363	0.426000277329811
Attention Score	Cell	any_affil_nature_indexTRUE	-0.0700170597660397	0.150216783104293	-0.466106771288187	0.641208416914713	-0.364436544523918	0.224402424991839
Attention Score	Cell	last_author_pub_age	-0.0181149832067101	0.00498142815684326	-3.63650395756978	0.000285943100303368	-0.0278784029856966	-0.00835156342772352
Attention Score	Cell	PC1	-0.134843287629013	0.0257612100961129	-5.23435378718328	1.89635390224029e-07	-0.185334331615563	-0.0843522436424617
Attention Score	Cell	PC2	-0.0277898320597631	0.0295273208558489	-0.941156571415058	0.346779894354244	-0.0856623174971853	0.0300826533776591
Attention Score	Cell	PC3	-0.0316396549910067	0.0361243975668655	-0.875852806470817	0.381253736541652	-0.102442173185269	0.039162863203256
Attention Score	Cell	PC4	0.117692537829888	0.0380034951862283	3.09688720085244	0.00199278473352836	0.0432070559782388	0.192178019681536
Attention Score	Cell	PC5	-0.108581779633229	0.0394870600135433	-2.74980663528731	0.00603640688791623	-0.185974995115146	-0.031188564151313
Attention Score	Cell	PC6	-0.106581736695862	0.0416173535807713	-2.56099265151514	0.0105368567556206	-0.188150250846043	-0.0250132225456816
Attention Score	Cell	PC7	-0.0710618596133586	0.0423786020901872	-1.67683349871073	0.0937885309049098	-0.154122393425279	0.0119986741985622
Attention Score	Cell	PC8	-0.0209350819921961	0.0430462041519807	-0.48633979243052	0.626799061179463	-0.105304091801237	0.0634339278168445
Attention Score	Cell	PC9	-0.0400665278612488	0.0434546482321373	-0.922030887172554	0.356664384325431	-0.125236073357095	0.0451030176345974
Attention Score	Cell	PC10	0.137396948231808	0.0446689320454307	3.07589507830786	0.00213758797083349	0.0498474501948971	0.224946446268719
Attention Score	Cell	PC11	0.00663114750849054	0.0454140483415401	0.14601533557679	0.883929383810474	-0.082378751633089	0.0956410466500701
Attention Score	Cell	PC12	-0.0569848835061438	0.0469658200098455	-1.21332670214633	0.225200659056613	-0.149036199229832	0.0350664322175439
Attention Score	Cell	PC13	-0.098498520370444	0.0487157872688426	-2.02190143878556	0.0433681256733676	-0.19397970889589	-0.00301733184499761
Attention Score	Cell	PC14	0.104073883699726	0.0503137486571719	2.06849790519218	0.0387684571871838	0.0054607484044685	0.202687018994983
Attention Score	Cell	PC15	0.100658100419325	0.055311262826855	1.81984816970139	0.068986263662714	-0.00774998266074012	0.20906618349939
Attention Score	Cell Rep	(Intercept)	1.60560676334767	0.464570614902894	3.45610917230156	0.000555347754538837	0.695065089862368	2.51614843683296
Attention Score	Cell Rep	preprintTRUE	0.422511257066951	0.462712690205748	0.913117936919083	0.361251025191663	-0.484388950925953	1.32941146505986
Attention Score	Cell Rep	preprint_age	0.610163436508107	0.735198914899836	0.829929729413754	0.406641969886324	-0.830799958168501	2.05112683118471
Attention Score	Cell Rep	ns(pub_date, df = 3)1	0.564043790731881	0.140512997238056	4.01417521381515	6.10567190427679e-05	0.288643376785516	0.839444204678247
Attention Score	Cell Rep	ns(pub_date, df = 3)2	0.456141453492132	0.345092191370703	1.3217959284455	0.186332957770975	-0.22022681294045	1.13250971992471
Attention Score	Cell Rep	ns(pub_date, df = 3)3	0.192667077344817	0.112760473792345	1.70864018982063	0.0876170151679015	-0.0283393901678519	0.413673544857487
Attention Score	Cell Rep	log2(authors)	0.233795869265457	0.0400271774351784	5.8409281954511	5.72499297699414e-09	0.155344043089713	0.312247695441201
Attention Score	Cell Rep	log2(references + 1)	0.147347449921996	0.0788067830456702	1.86973055145019	0.0616147738975117	-0.00711100658497924	0.301805906428971
Attention Score	Cell Rep	any_affil_usaTRUE	0.280362507985887	0.06944018938683	4.03746750205523	5.53302414211244e-05	0.14426223770806	0.416462778263714
Attention Score	Cell Rep	any_affil_nature_indexTRUE	-0.0281304938480263	0.0816452726965484	-0.344545286198984	0.730459451672502	-0.188152287841213	0.13189130014516
Attention Score	Cell Rep	last_author_pub_age	-0.0124461671678717	0.00404929956392117	-3.07365927647481	0.00213277471314607	-0.0203826484757709	-0.00450968585997248
Attention Score	Cell Rep	PC1	-0.0526986231660014	0.0211847346116193	-2.48757532875099	0.0129135354332845	-0.0942199400268144	-0.0111773063051884
Attention Score	Cell Rep	PC2	-0.102765440447877	0.02722784981173	-3.77427674819937	0.000163456826498001	-0.156131045455333	-0.0493998354404205
Attention Score	Cell Rep	PC3	0.0556381657932732	0.0295209894636541	1.88469854175363	0.0595633617185886	-0.00222191034347533	0.113498241930022
Attention Score	Cell Rep	PC4	-0.0719450873683835	0.030206022016203	-2.38181271700693	0.0172872292354054	-0.131147802636365	-0.0127423721004018
Attention Score	Cell Rep	PC5	-0.0475875423237707	0.0309222020732894	-1.5389441609295	0.123919269141913	-0.108193944710088	0.0130188600625462
Attention Score	Cell Rep	PC6	0.0417188758249374	0.0318466036582103	1.30999450593476	0.190294072776752	-0.0206993203750764	0.104137072024951
Attention Score	Cell Rep	PC7	0.042971540363749	0.0322734178370305	1.33148402752817	0.183127005646112	-0.0202831962548434	0.106226276982341
Attention Score	Cell Rep	PC8	-0.0225273887450607	0.0326773847994308	-0.689387748846203	0.490630524151968	-0.0865738860609016	0.0415191085707802
Attention Score	Cell Rep	PC9	-0.0850668201754499	0.0332350462880378	-2.55955172856394	0.010527437218632	-0.150206313924526	-0.0199273264263742
Attention Score	Cell Rep	PC10	-0.0886507154404109	0.0335605524566362	-2.64151537895442	0.00829476550810946	-0.154428189556685	-0.0228732413241368
Attention Score	Cell Rep	PC11	0.1195787649951	0.033831078731888	3.53458327305389	0.000414348449756856	0.053271069122461	0.18588646086774
Attention Score	Cell Rep	PC12	-0.0909742204074055	0.0342544040316912	-2.65584011688654	0.00795133350776082	-0.158111618621404	-0.0238368221934072
Attention Score	Cell Rep	PC13	0.0157093798754053	0.0348220621837736	0.451132956816256	0.651925058191178	-0.0525406078722052	0.0839593676230158
Attention Score	Cell Rep	PC14	0.0245966147320359	0.0366118914216169	0.671820377941829	0.501747763314826	-0.0471613738602242	0.096354603324296
Attention Score	Cell Rep	PC15	-0.114459389899278	0.0371991112415581	-3.07693883211399	0.00210952020534802	-0.187368308189631	-0.0415504716089251
Attention Score	Development	(Intercept)	2.28627108673353	0.234168639433154	9.76335299324388	7.97946336584047e-22	1.8273089871358	2.74523318633126
Attention Score	Development	preprintTRUE	0.980007637910886	0.387393575790641	2.52974674634386	0.0115242137975925	0.220730181519042	1.73928509430273
Attention Score	Development	preprint_age	-0.244511770623265	0.616868912348822	-0.396375576282893	0.69188882071152	-1.45355262200935	0.96452908076282
Attention Score	Development	ns(pub_date, df = 3)1	0.525087168280865	0.1986752498844	2.64294203020451	0.0083112690553734	0.135690833887946	0.914483502673785
Attention Score	Development	ns(pub_date, df = 3)2	0.108743958514919	0.42116288887293	0.25819928912998	0.796291330116006	-0.716720135300869	0.934208052330708
Attention Score	Development	ns(pub_date, df = 3)3	-0.34639790120006	0.163267932583187	-2.12165301366554	0.0340434076983823	-0.66639716889342	-0.0263986335067006
Attention Score	Development	log2(authors)	0.0518874909942374	0.0562047989034596	0.923186133685171	0.356070433849181	-0.0582718906148597	0.162046872603335
Attention Score	Development	log2(references + 1)	-0.00710833831239302	0.0305420395385164	-0.232739477120666	0.815997976840136	-0.0669696358222835	0.0527529591974974
Attention Score	Development	any_affil_usaTRUE	-0.0747214146239498	0.0915146810567623	-0.816496476424407	0.414356144087741	-0.254086893551874	0.104644064303974
Attention Score	Development	any_affil_nature_indexTRUE	0.178579841017814	0.097837551698873	1.82526890664079	0.0681749625047895	-0.0131782366475532	0.37033791868318
Attention Score	Development	last_author_pub_age	-0.0156265990601729	0.00565912073742029	-2.76131218704062	0.00583270529273725	-0.0267182718896805	-0.00453492623066543
Attention Score	Development	PC1	0.0565319966971401	0.0257980090550145	2.19133176426852	0.0285932713666147	0.00596882807647353	0.107095165317807
Attention Score	Development	PC2	0.0570997230738952	0.0282432336924602	2.02171336666518	0.0433972600846366	0.00174400222972489	0.112455443918065
Attention Score	Development	PC3	0.176050240154533	0.0287896281625796	6.11505779652134	1.25207022719881e-09	0.119623605827577	0.232476874481489
Attention Score	Development	PC4	0.0330107438380387	0.0322021255423016	1.02511071185891	0.305489313350349	-0.0301042624505099	0.0961257501265873
Attention Score	Development	PC5	-0.0421209487496155	0.0327102011216042	-1.28770069597022	0.198064516121884	-0.106231764875021	0.0219898673757904
Attention Score	Development	PC6	0.00381805005174826	0.0344252978852861	0.11090826474388	0.91170510308109	-0.0636542939604754	0.0712903940639719
Attention Score	Development	PC7	0.0044389907364808	0.0349997745321625	0.126829123781973	0.899093987919798	-0.06415930681358	0.0730372882865416
Attention Score	Development	PC8	-7.13626800686058e-05	0.0363566417233598	-0.00196285126144514	0.998434153942015	-0.07132907105668	0.0711863456965428
Attention Score	Development	PC9	-0.102058773663448	0.037210045707935	-2.74277474595211	0.00617047382321731	-0.17498912311409	-0.0291284242128059
Attention Score	Development	PC10	-0.0426514166036927	0.0385922537061069	-1.10518076836087	0.269272525939378	-0.118290843949895	0.0329880107425092
Attention Score	Development	PC11	-0.0340742119801807	0.0392133191561731	-0.868944856324834	0.385027303077465	-0.110930905240554	0.0427824812801931
Attention Score	Development	PC12	0.0259528805095281	0.0398560746649885	0.651164991225951	0.515047618601983	-0.0521635903989887	0.104069351418045
Attention Score	Development	PC13	-0.0004735905760354	0.0408963399532145	-0.011580267979413	0.990762151258226	-0.0806289439838423	0.0796817628317715
Attention Score	Development	PC14	-0.0137623454815473	0.0411793433364611	-0.334205073866775	0.738275231322206	-0.0944723753280205	0.066947684364926
Attention Score	Development	PC15	-0.0318906594990276	0.0421345632677797	-0.756876469713272	0.449252142976668	-0.1144728860082	0.0506915670101449
Attention Score	Elife	(Intercept)	2.33650710027236	0.329766199702783	7.08534441182342	1.60711881340445e-12	1.69017722553626	2.98283697500846
Attention Score	Elife	preprintTRUE	0.430678135758502	0.154400096017286	2.78936442960687	0.00530381129187761	0.128059508355095	0.733296763161908
Attention Score	Elife	preprint_age	0.384835409556449	0.276351074697295	1.39255984431392	0.16382309018931	-0.156802743939187	0.926473563052085
Attention Score	Elife	ns(pub_date, df = 3)1	0.364234495896937	0.130690829709648	2.78699352285195	0.00534270178931154	0.108085176556369	0.620383815237505
Attention Score	Elife	ns(pub_date, df = 3)2	0.104191207984343	0.306178963927755	0.340295122328939	0.733650486833039	-0.495908534137845	0.704290950106531
Attention Score	Elife	ns(pub_date, df = 3)3	0.0881432501420948	0.113962055783072	0.773443840903293	0.439301180147707	-0.135218274796872	0.311504775081061
Attention Score	Elife	log2(authors)	0.241184905917649	0.035832826995745	6.73083666957924	1.90301015523922e-11	0.170953855541735	0.311415956293564
Attention Score	Elife	log2(references + 1)	0.0615430826215435	0.0534612588197416	1.15117159566055	0.249724015513918	-0.0432390592333242	0.166325224476411
Attention Score	Elife	any_affil_usaTRUE	0.0360511466087001	0.0668128708512284	0.539583857861381	0.589511274753003	-0.0948996739634336	0.167001967180834
Attention Score	Elife	any_affil_nature_indexTRUE	0.0727158018413771	0.0783351320297637	0.928265517108574	0.35332062432295	-0.0808182356611498	0.226249839343904
Attention Score	Elife	last_author_pub_age	-0.0196131454684586	0.00372959616568974	-5.25878529393849	1.51870588182408e-07	-0.0269230196300892	-0.012303271306828
Attention Score	Elife	PC1	0.0259106626775437	0.0212098523349699	1.22163333663683	0.221911570269488	-0.0156598840164101	0.0674812093714976
Attention Score	Elife	PC2	0.244529209127066	0.0259577947566914	9.42026129026355	7.05785324022823e-21	0.193652866285869	0.295405551968264
Attention Score	Elife	PC3	0.142062620264011	0.0269794116199836	5.26559371512705	1.46381927150142e-07	0.0891839451647619	0.19494129536326
Attention Score	Elife	PC4	-0.234342596176967	0.0297791007705626	-7.86936442381166	4.45120711858575e-15	-0.292708561179259	-0.175976631174676
Attention Score	Elife	PC5	-0.0269310248633995	0.0301166719069375	-0.894223138154777	0.371251280493617	-0.0859586171352063	0.0320965674084073
Attention Score	Elife	PC6	-0.119652719268897	0.0317040858437014	-3.77404729026962	0.000162729127294806	-0.181791585685317	-0.0575138528524757
Attention Score	Elife	PC7	-0.227334320327691	0.0327857077187228	-6.93394579973849	4.68594177277722e-12	-0.291593126664045	-0.163075513991338
Attention Score	Elife	PC8	-0.211047535558104	0.0332206083724231	-6.35291001272865	2.32619668665615e-10	-0.276158731512563	-0.145936339603645
Attention Score	Elife	PC9	0.011358331114356	0.0337755538064059	0.336288523334347	0.736669292418346	-0.0548405379040943	0.0775572001328064
Attention Score	Elife	PC10	0.0258718552452388	0.0354761313977102	0.729274986474674	0.465872172829915	-0.0436600846050837	0.0954037950955614
Attention Score	Elife	PC11	-0.0478033326517897	0.0394749296854706	-1.21097955164653	0.225968089118436	-0.125172773127563	0.0295661078239837
Attention Score	Elife	PC12	0.0356008432875905	0.0483039001578907	0.737017987599804	0.461150591456864	-0.059073061334694	0.130274747909875
Attention Score	Elife	PC13	0.00406790956667693	0.0516414394947123	0.0787721954786612	0.937217391560963	-0.0971474519527635	0.105283271086117
Attention Score	Evolution	(Intercept)	1.7234505405051	0.553628121927805	3.11301119333285	0.00192011739428207	0.638359360698053	2.80854172031215
Attention Score	Evolution	preprintTRUE	-0.378442187694984	0.339074266169069	-1.11610412659947	0.264724389043503	-1.04301553747071	0.286131162080739
Attention Score	Evolution	preprint_age	1.23412056637	0.546299095455952	2.25905658024196	0.0241576687341859	0.163394014489524	2.30484711825048
Attention Score	Evolution	ns(pub_date, df = 3)1	0.666065070826147	0.211883454677971	3.1435445105351	0.00173292148910076	0.250781130737399	1.08134901091489
Attention Score	Evolution	ns(pub_date, df = 3)2	0.253870137821363	0.416872392242202	0.608987648368579	0.542711552521505	-0.563184737122407	1.07092501276513
Attention Score	Evolution	ns(pub_date, df = 3)3	0.483773950433163	0.201022237812137	2.40656932137662	0.0163367780159665	0.089777604229729	0.877770296636596
Attention Score	Evolution	log2(authors)	0.0320112753854423	0.0643721042882759	0.497284899093668	0.619129571847957	-0.0941557306286347	0.158178281399519
Attention Score	Evolution	log2(references + 1)	0.211124693641987	0.0849647480194261	2.48485046520371	0.0131711274692451	0.0445968475683907	0.377652539715583
Attention Score	Evolution	any_affil_usaTRUE	0.0878761187024792	0.100724319432999	0.87244192065188	0.383238249677066	-0.109539919753507	0.285292157158465
Attention Score	Evolution	any_affil_nature_indexTRUE	0.0630082538198816	0.101307785249058	0.621948783748262	0.534158937794179	-0.13555135662179	0.261567864261553
Attention Score	Evolution	last_author_pub_age	-0.0198208282234152	0.00698114621922553	-2.83919396629026	0.004641452800459	-0.0335036233839052	-0.00613803306292522
Attention Score	Evolution	PC1	-0.131816597829137	0.0340983043176566	-3.86578161192845	0.000120037980950279	-0.198648046225631	-0.0649851494326439
Attention Score	Evolution	PC2	0.102140357538849	0.0365653869115879	2.79336186940443	0.00534533730331471	0.0304735161113648	0.173807198966334
Attention Score	Evolution	PC3	0.0514811825682005	0.0385411498355238	1.33574589206339	0.182025482052115	-0.0240580830321881	0.127020448168589
Attention Score	Evolution	PC4	-0.0280822127808401	0.0422332623550338	-0.664931175450455	0.506292837137394	-0.110857885946338	0.0546934603846574
Attention Score	Evolution	PC5	-0.0305362514900631	0.0425695487666276	-0.717326172693708	0.473389561885175	-0.113971033910775	0.0528985309306485
Attention Score	Evolution	PC6	0.10411639477688	0.0453003469744964	2.29835755641112	0.0218075104217881	0.0153293462196987	0.19290344333406
Attention Score	Evolution	PC7	-0.0946612803667187	0.046162703457646	-2.05060088072116	0.0406425281300703	-0.185138516572708	-0.00418404416072993
Attention Score	Evolution	PC8	0.000925982866395783	0.0477147466369358	0.0194066390720177	0.984521722169815	-0.0925932020734519	0.0944451678062435
Attention Score	Evolution	PC9	0.00981190654918111	0.0478444209815009	0.205079429281314	0.837564057401803	-0.0839614354357331	0.103585248534095
Attention Score	Evolution	PC10	0.0573932896590034	0.0491884826955285	1.16680341644734	0.243649592331474	-0.0390143648784041	0.153800944196411
Attention Score	Evolution	PC11	-0.0336527406277702	0.0499032618934572	-0.674359537851822	0.500284378781292	-0.131461336650016	0.064155855394476
Attention Score	Evolution	PC12	0.0325963953396124	0.0510326563173026	0.638736011250125	0.523183884367919	-0.0674257730777113	0.132618563756936
Attention Score	Evolution	PC13	0.0433339066979478	0.0525086819049447	0.825271271832612	0.409472204409058	-0.0595812187114138	0.146249032107309
Attention Score	Evolution	PC14	0.0634228964529842	0.0540389529413189	1.17365146807813	0.24089614198354	-0.0424915050742557	0.169337297980224
Attention Score	Evolution	PC15	0.0410405631034182	0.0543774674671889	0.754734727728574	0.450638036622616	-0.0655373147027705	0.147618440909607
Attention Score	G3 (Bethesda)	(Intercept)	0.611096813784799	0.295120843795807	2.0706663952466	0.0385988843276767	0.0326705888579468	1.18952303871165
Attention Score	G3 (Bethesda)	preprintTRUE	0.481590853496988	0.149346583060051	3.22465264105403	0.00129452513501661	0.188876929485169	0.774304777508807
Attention Score	G3 (Bethesda)	preprint_age	0.508795358241976	0.281777322664275	1.80566467674257	0.0712159346114204	-0.0434780458401256	1.06106876232408
Attention Score	G3 (Bethesda)	ns(pub_date, df = 3)1	-0.908320215860394	0.162687280389588	-5.58322822586519	2.90463339047766e-08	-1.22718142616676	-0.589459005554032
Attention Score	G3 (Bethesda)	ns(pub_date, df = 3)2	0.79520020194198	0.35385293301092	2.24726186434475	0.0248005583308	0.101661197416712	1.48873920646725
Attention Score	G3 (Bethesda)	ns(pub_date, df = 3)3	-0.480559762300511	0.146485726498641	-3.28059104314828	0.00106503407040366	-0.767666510487032	-0.19345301411399
Attention Score	G3 (Bethesda)	log2(authors)	0.137968299756029	0.0425384665587653	3.24337736917318	0.00121305413783556	0.0545944373432878	0.221342162168771
Attention Score	G3 (Bethesda)	log2(references + 1)	0.132719889579203	0.041059329235161	3.2323930286116	0.00126025233636797	0.0522450830489146	0.213194696109491
Attention Score	G3 (Bethesda)	any_affil_usaTRUE	0.247252505888251	0.0787273745738061	3.14061668164044	0.001726239106776	0.0929496871261964	0.401555324650305
Attention Score	G3 (Bethesda)	any_affil_nature_indexTRUE	0.379024918449519	0.0788360348931482	4.80776232548018	1.71536679308336e-06	0.224509129375006	0.533540707524033
Attention Score	G3 (Bethesda)	last_author_pub_age	-0.00630106272088174	0.0046045036275652	-1.36845645709995	0.17141995318719	-0.0153257239975936	0.00272359855583008
Attention Score	G3 (Bethesda)	PC1	0.002865714115878	0.0197949571688785	0.144769907377393	0.884916336998441	-0.0359316890106368	0.0416631172423928
Attention Score	G3 (Bethesda)	PC2	-0.0740381786415257	0.0226164679422262	-3.2736402001699	0.00109134331767831	-0.118365641265794	-0.0297107160172575
Attention Score	G3 (Bethesda)	PC3	0.0932240878866494	0.0228209243023254	4.08502682238641	4.69327679283544e-05	0.0484958981601766	0.137952277613122
Attention Score	G3 (Bethesda)	PC4	0.0526206161142297	0.0261293020230349	2.01385463981551	0.0442429225266198	0.00140812520791171	0.103833107020548
Attention Score	G3 (Bethesda)	PC5	-0.0740038639383607	0.0272948523275924	-2.71127548338301	0.00679612113649147	-0.127500791463781	-0.0205069364129405
Attention Score	G3 (Bethesda)	PC6	-0.0750843376293	0.0277034015006331	-2.71029308901234	0.00681616256223767	-0.129382006819794	-0.0207866684388062
Attention Score	G3 (Bethesda)	PC7	0.00642300435264737	0.0307603189947913	0.208808119113946	0.83463271920207	-0.0538661130301069	0.0667121217354017
Attention Score	G3 (Bethesda)	PC8	-0.07812402589161	0.0315151285096931	-2.47893724652214	0.0133111352402218	-0.13989254273876	-0.0163555090444601
Attention Score	G3 (Bethesda)	PC9	0.0549278569799019	0.032303335194135	1.70037727218565	0.0893136022018325	-0.00838551658112781	0.118241230540932
Attention Score	G3 (Bethesda)	PC10	0.0835440946978635	0.032981629585341	2.53304932922404	0.0114313446846228	0.0189012885591545	0.148186900836573
Attention Score	G3 (Bethesda)	PC11	-0.0107141666829179	0.0343313872820089	-0.31208079635432	0.755032187277273	-0.0780024492949517	0.0565741159291159
Attention Score	G3 (Bethesda)	PC12	0.00127334260831281	0.0345554663354699	0.0368492381480545	0.970611213172651	-0.0664541268781944	0.0690008120948201
Attention Score	G3 (Bethesda)	PC13	0.000378803199026877	0.0354021936688656	0.0106999922821171	0.991464545080285	-0.0690082213656617	0.0697658277637154
Attention Score	G3 (Bethesda)	PC14	-0.0185019778768443	0.0361113767326922	-0.512358695538023	0.608492279922358	-0.0892789757050787	0.0522750199513901
Attention Score	G3 (Bethesda)	PC15	0.0202069013455135	0.036211691322622	0.558021473382269	0.576931602886658	-0.0507667094661072	0.0911805121571341
Attention Score	Genetics	(Intercept)	1.47031517156813	0.466466650176964	3.15202634745772	0.0016623601680297	0.556057337232238	2.38457300590402
Attention Score	Genetics	preprintTRUE	0.636599610059232	0.174077326761975	3.65699325639166	0.000266462921601036	0.29541431908075	0.977784901037713
Attention Score	Genetics	preprint_age	-0.0303249554609381	0.312191804039442	-0.0971356552880769	0.922635203238347	-0.64220964764683	0.581559736724954
Attention Score	Genetics	ns(pub_date, df = 3)1	-0.364164960703666	0.192846440382986	-1.8883675528594	0.0592223637451717	-0.742137038401069	0.0138071169937373
Attention Score	Genetics	ns(pub_date, df = 3)2	-0.559573691161668	0.417552881631512	-1.34012652235864	0.180462856926764	-1.37796230080035	0.258814918477012
Attention Score	Genetics	ns(pub_date, df = 3)3	0.146172993133948	0.17127739782283	0.853428385718177	0.393595430222176	-0.189524537964538	0.481870524232434
Attention Score	Genetics	log2(authors)	0.00633202761396974	0.0545288442681609	0.116122534760323	0.90757523846954	-0.100542543270219	0.113206598498158
Attention Score	Genetics	log2(references + 1)	0.161333082320975	0.0749661573069599	2.15207885953622	0.0315940091516017	0.0144021139399693	0.30826405070198
Attention Score	Genetics	any_affil_usaTRUE	0.267961358067793	0.0978106411331489	2.73959310524322	0.00624447142983679	0.0762560241420495	0.459666691993537
Attention Score	Genetics	any_affil_nature_indexTRUE	0.424018730834161	0.0984664668074377	4.30622469336061	1.79886202566152e-05	0.231028002206675	0.617009459461648
Attention Score	Genetics	last_author_pub_age	-0.00986485476224988	0.00553505955489539	-1.78224907327782	0.0749663448416338	-0.0207133721421291	0.00098366261762939
Attention Score	Genetics	PC1	-0.110379899837784	0.0253462874154901	-4.35487446458634	1.4472763123623e-05	-0.160057710313945	-0.0607020893616225
Attention Score	Genetics	PC2	0.0983006484642333	0.0278074909007416	3.53504200774949	0.000423539819481369	0.0437989677983544	0.152802329130112
Attention Score	Genetics	PC3	0.00763398216161072	0.0316246599753202	0.241393335693357	0.809292323353508	-0.0543492124133421	0.0696171767365636
Attention Score	Genetics	PC4	0.0194224629571474	0.0365282830178084	0.531710262638911	0.595027019504607	-0.0521716561748432	0.0910165820891379
Attention Score	Genetics	PC5	0.217857392836798	0.0366005439093938	5.95229932582733	3.48457739879778e-09	0.14612164495981	0.289593140713787
Attention Score	Genetics	PC6	-0.0883977854190696	0.0392468778527262	-2.25235204060772	0.0244836896728377	-0.165320252516056	-0.0114753183220836
Attention Score	Genetics	PC7	0.080650022352717	0.0407031424398897	1.98142004568371	0.0477765735694409	0.000873329112929408	0.160426715592505
Attention Score	Genetics	PC8	-0.0126908430421086	0.0420121567858275	-0.302075494643249	0.762647880560468	-0.0950331572551804	0.0696514711709633
Attention Score	Genetics	PC9	-0.0792750267771646	0.0424930455670361	-1.86560002276378	0.0623459714160993	-0.162559865681975	0.00400981212764541
Attention Score	Genetics	PC10	0.0846052488569741	0.0436548956575946	1.9380472128618	0.0528563676686747	-0.000956774380765399	0.170167272094714
Attention Score	Genetics	PC11	-0.0940843864203375	0.0453380614069874	-2.07517444505992	0.0381871847061974	-0.182945353906898	-0.00522341893377699
Attention Score	Genetics	PC12	-0.103973620732674	0.0461695780801947	-2.25199417140169	0.0245063659874651	-0.194464330951265	-0.0134829105140823
Attention Score	Genetics	PC13	-0.0443739212138961	0.0468278332487014	-0.947597147581597	0.343529086117083	-0.136154787855398	0.0474069454276059
Attention Score	Genetics	PC14	0.076862887257504	0.0478444842427855	1.60651511817884	0.108429000774045	-0.0169105787172497	0.170636353232258
Attention Score	Genetics	PC15	-0.0621810429153087	0.0481251258801189	-1.29207023936319	0.196586449604128	-0.156504556391798	0.0321424705611808
Attention Score	Genome Biol	(Intercept)	2.93198403507015	0.608387993256553	4.81926676326394	1.77355771943689e-06	1.73956547966071	4.12440259047959
Attention Score	Genome Biol	preprintTRUE	0.293243530244232	0.24150645618038	1.21422646368182	0.22507726513714	-0.180100425903213	0.766587486391677
Attention Score	Genome Biol	preprint_age	0.395336875408544	0.295756532825846	1.33669701775053	0.181762761957901	-0.184335277122551	0.97500902793964
Attention Score	Genome Biol	ns(pub_date, df = 3)1	0.678393959764106	0.25316734162281	2.6796266667556	0.00754645702884292	0.182195088121651	1.17459283140656
Attention Score	Genome Biol	ns(pub_date, df = 3)2	0.353070323465764	0.49069423883541	0.719532237231323	0.472057029827523	-0.608672712072936	1.31481335900446
Attention Score	Genome Biol	ns(pub_date, df = 3)3	-0.478876626992731	0.196667522100168	-2.43495530873077	0.0151463624124177	-0.864337887237795	-0.0934153667476665
Attention Score	Genome Biol	log2(authors)	0.158075875355839	0.0558436785542551	2.8306852171685	0.00478020545361189	0.0486242766252676	0.267527474086411
Attention Score	Genome Biol	log2(references + 1)	0.0935594548281124	0.101529126421584	0.921503593359226	0.357110111685979	-0.105433976340005	0.29255288599623
Attention Score	Genome Biol	any_affil_usaTRUE	-0.0122241455033908	0.118121229849093	-0.103488132649888	0.917605681994897	-0.24373750181719	0.219289210810408
Attention Score	Genome Biol	any_affil_nature_indexTRUE	0.158368372159496	0.137026946465238	1.15574619623937	0.248185600546974	-0.110199507823869	0.426936252142861
Attention Score	Genome Biol	last_author_pub_age	-0.0105015603409074	0.00818191131786692	-1.28350943110017	0.199745161102584	-0.0265378118486272	0.00553469116681243
Attention Score	Genome Biol	PC1	0.0296180907934997	0.0343186771527986	0.863031248600574	0.388420590463317	-0.0376452804230431	0.0968814620100426
Attention Score	Genome Biol	PC2	0.0253361878406244	0.0373071679917741	0.679123857544234	0.497287450177295	-0.0477845177884384	0.0984568934696872
Attention Score	Genome Biol	PC3	-0.122915666672987	0.0363794362587883	-3.37871279254068	0.000769265670656077	-0.194218051518082	-0.0516132818278908
Attention Score	Genome Biol	PC4	0.116342167009822	0.0416774843429196	2.79148727050237	0.00539196574553679	0.0346557987314676	0.198028535288176
Attention Score	Genome Biol	PC5	0.117412825636729	0.0425587200589428	2.75884296976307	0.0059545819707477	0.0339992670930786	0.200826384180379
Attention Score	Genome Biol	PC6	-0.00587471001775108	0.04560879472777	-0.128806517532771	0.89754833739404	-0.0952663050624606	0.0835168850269585
Attention Score	Genome Biol	PC7	0.0710716640527669	0.0472584374124154	1.50389365252469	0.133066973878426	-0.0215531712412076	0.163696499346741
Attention Score	Genome Biol	PC8	0.113305116735528	0.0475598324045188	2.38236997497834	0.0174719067890239	0.0200895581119098	0.206520675359145
Attention Score	Genome Biol	PC9	-0.0110428017235699	0.0483772745875783	-0.228264238068618	0.819508551475036	-0.105860517585428	0.0837749141382883
Attention Score	Genome Biol	PC10	-0.0961885680184149	0.0499434964443375	-1.92594781836346	0.0545220356103852	-0.194076022311321	0.0016988862744909
Attention Score	Genome Biol	PC11	0.0338791931746059	0.0511523992302896	0.662318751112354	0.507988433618566	-0.066377667039576	0.134136053388788
Attention Score	Genome Biol	PC12	-0.0380887363575509	0.0518351305452015	-0.734805448678027	0.462708003476144	-0.139683725360078	0.0635062526449761
Attention Score	Genome Biol	PC13	-0.0516467905676931	0.0536228216707838	-0.963149438214524	0.335810438118937	-0.156745589791843	0.0534520086564572
Attention Score	Genome Biol	PC14	-0.0476298974156825	0.0537474155103423	-0.886180237010974	0.375829600917796	-0.152972896078063	0.057713101246698
Attention Score	Genome Biol	PC15	0.0218666826426961	0.0546785718850705	0.399913199793475	0.689344397917908	-0.0853013489781264	0.129034714263519
Attention Score	Genome Biol Evol	(Intercept)	0.211598879756819	0.452827025431216	0.467284123679055	0.64040502749332	-0.675925781314768	1.09912354082841
Attention Score	Genome Biol Evol	preprintTRUE	0.401506623130857	0.250615108335248	1.6020846699863	0.10947321024022	-0.0896899631878336	0.892703209449547
Attention Score	Genome Biol Evol	preprint_age	0.129493085489322	0.330460710012484	0.391856222436944	0.695253364606207	-0.518198004440682	0.777184175419326
Attention Score	Genome Biol Evol	ns(pub_date, df = 3)1	0.345255324499678	0.184094676986663	1.8754226366072	0.0610447238917591	-0.0155636121397161	0.706074261139072
Attention Score	Genome Biol Evol	ns(pub_date, df = 3)2	0.799599696297532	0.394215389601473	2.02833201693591	0.0428082143638295	0.0269517305272197	1.57224766206785
Attention Score	Genome Biol Evol	ns(pub_date, df = 3)3	0.610920558138271	0.163083515583488	3.74605953245789	0.00019058227498446	0.291282741122458	0.930558375154085
Attention Score	Genome Biol Evol	log2(authors)	0.00792952219956854	0.0519584060143387	0.152612884186252	0.8787363499106	-0.0939070822826445	0.109766126681782
Attention Score	Genome Biol Evol	log2(references + 1)	0.300326035853619	0.0686396028895683	4.37540462372432	1.34784744486844e-05	0.165794886276933	0.434857185430304
Attention Score	Genome Biol Evol	any_affil_usaTRUE	0.164905954145005	0.105886986840226	1.55737696449738	0.119717967390026	-0.0426287264933043	0.372440634783314
Attention Score	Genome Biol Evol	any_affil_nature_indexTRUE	0.296923061084248	0.0880540202977119	3.37205570035697	0.000776553045842055	0.124340352606773	0.469505769561722
Attention Score	Genome Biol Evol	last_author_pub_age	-0.00760412941682476	0.00559833202156172	-1.35828482261106	0.174699565160158	-0.018576658552583	0.00336839971893351
Attention Score	Genome Biol Evol	PC1	-0.0897076076638765	0.0319223968250725	-2.81017769923274	0.00505433966652402	-0.152274355741214	-0.0271408595865388
Attention Score	Genome Biol Evol	PC2	-0.022186739402281	0.0338006427326559	-0.656399926408669	0.511727656433281	-0.088434781812592	0.04406130300803
Attention Score	Genome Biol Evol	PC3	-0.151859644575828	0.0345573616593859	-4.39442241200675	1.2372669445353e-05	-0.21959082882895	-0.0841284603227064
Attention Score	Genome Biol Evol	PC4	-0.00582271031128649	0.0360799444705894	-0.161383571863113	0.871826020497826	-0.0765381020378468	0.0648926814152738
Attention Score	Genome Biol Evol	PC5	-0.0727996006547059	0.0373460468588914	-1.9493254782701	0.0515539828897138	-0.145996507463078	0.000397306153666288
Attention Score	Genome Biol Evol	PC6	-0.0490848185810503	0.0398438615694719	-1.23192925202458	0.218283915675521	-0.127177352262215	0.0290077151001141
Attention Score	Genome Biol Evol	PC7	0.04017713699629	0.0406201995404461	0.9890925561871	0.322872655869247	-0.0394369911478149	0.119791265140395
Attention Score	Genome Biol Evol	PC8	-0.00912332192261653	0.0404317787463507	-0.225647305300413	0.821524846948497	-0.0883681520963558	0.0701215082511228
Attention Score	Genome Biol Evol	PC9	0.0474829133996287	0.0411627731429186	1.15354019601076	0.248982259430687	-0.0331946394642843	0.128160466263542
Attention Score	Genome Biol Evol	PC10	0.0893887814120029	0.0411655733187619	2.17144507425729	0.0301473205587669	0.00870574030428657	0.170071822519719
Attention Score	Genome Biol Evol	PC11	-0.0574649674933147	0.0414422975039	-1.38662600662781	0.165884938252581	-0.138690378037553	0.0237604430509236
Attention Score	Genome Biol Evol	PC12	0.0271779312958112	0.0433795136251355	0.626515353092006	0.531129246009401	-0.0578443530763188	0.112200215667941
Attention Score	Genome Biol Evol	PC13	-0.0586721317271437	0.0438144421323847	-1.33910484469634	0.180860602476529	-0.144546860309332	0.0272025968550446
Attention Score	Genome Biol Evol	PC14	-0.116610899800558	0.0445164103625054	-2.61950365833574	0.00894782121893316	-0.203861460832074	-0.0293603387690419
Attention Score	Genome Biol Evol	PC15	-0.02462739652437	0.0452220403909477	-0.544588353631647	0.586165968604569	-0.113260966998043	0.064006173949303
Attention Score	Genome Res	(Intercept)	2.98839969816667	0.822207467049928	3.63460539818377	0.000301535663061986	1.37690267492891	4.59989672140443
Attention Score	Genome Res	preprintTRUE	0.4013660207419	0.34206747292793	1.17335336594971	0.241105419671754	-0.269073906479474	1.07180594796327
Attention Score	Genome Res	preprint_age	0.0945663879967429	0.466448831440864	0.202736895501756	0.839407302800172	-0.819656522258145	1.00878929825163
Attention Score	Genome Res	ns(pub_date, df = 3)1	0.258446345302033	0.27009263779292	0.956880377836081	0.339001197652162	-0.270925497261512	0.787818187865579
Attention Score	Genome Res	ns(pub_date, df = 3)2	0.414070562844072	0.547638544143118	0.756101934884737	0.449875725474934	-0.659281260222388	1.48742238591053
Attention Score	Genome Res	ns(pub_date, df = 3)3	-0.273945215591271	0.224158669087253	-1.22210404222484	0.222133449931231	-0.713288133824718	0.165397702642176
Attention Score	Genome Res	log2(authors)	0.291140144502739	0.0654807623498976	4.44619356975452	1.03600320462407e-05	0.162800208616713	0.419480080388765
Attention Score	Genome Res	log2(references + 1)	-0.0832273695872597	0.132968071648292	-0.625919956238822	0.531598162220305	-0.343840001111654	0.177385261937135
Attention Score	Genome Res	any_affil_usaTRUE	0.0752467538079977	0.131888230306452	0.570534259449508	0.568522432514291	-0.183249427577372	0.333742935193367
Attention Score	Genome Res	any_affil_nature_indexTRUE	0.222154801265512	0.152835959890821	1.45355060042289	0.146577728946814	-0.0773981756631052	0.521707778194129
Attention Score	Genome Res	last_author_pub_age	-0.0130820792348508	0.00805566434787296	-1.62396031784828	0.104893359217922	-0.0288708912282252	0.00270673275852353
Attention Score	Genome Res	PC1	0.121463078469381	0.0371687600147002	3.26788083383312	0.00114352520504722	0.0486136474905567	0.194312509448206
Attention Score	Genome Res	PC2	-7.4773401480635e-05	0.0412754413117339	-0.00181157121775893	0.998555159742098	-0.0809731518184758	0.0808236050155145
Attention Score	Genome Res	PC3	0.0310217648287227	0.0453235318309582	0.684451620946566	0.493946205634715	-0.0578107252121102	0.119854254869556
Attention Score	Genome Res	PC4	-0.205682042709371	0.0455605538377046	-4.51447634815964	7.59969025487554e-06	-0.294979087346971	-0.116384998071772
Attention Score	Genome Res	PC5	-0.0473341231741265	0.0493696486636526	-0.958769698699015	0.338049105186617	-0.144096856484282	0.0494286101360287
Attention Score	Genome Res	PC6	0.0494607215209841	0.0514339560136218	0.961635568298206	0.336608186597494	-0.0513479798481319	0.1502694228901
Attention Score	Genome Res	PC7	0.0360149789016624	0.0542021880597728	0.664456181398913	0.506645826408294	-0.0702193575787592	0.142249315382084
Attention Score	Genome Res	PC8	0.0355745588896141	0.0557647945479696	0.637939387708358	0.523749052195964	-0.0737224300296818	0.14487154780891
Attention Score	Genome Res	PC9	-0.0276060800421974	0.0566545850315527	-0.487270006952178	0.626239510126417	-0.138647026263103	0.0834348661787079
Attention Score	Genome Res	PC10	-0.193654464639064	0.0571777526561957	-3.38688485718369	0.000751708648596177	-0.305720800562147	-0.081588128715981
Attention Score	Genome Res	PC11	-0.0597146028443328	0.0592486862195348	-1.0078637460934	0.313913685783426	-0.175839893965936	0.05641068827727
Attention Score	Genome Res	PC12	-0.0268841863908816	0.0607023837663546	-0.44288518379047	0.6580035126566	-0.145858672348665	0.0920902995669022
Attention Score	Genome Res	PC13	-0.0075604686862386	0.0608570807931266	-0.124233180226622	0.901170982654519	-0.126838155245011	0.111717217872534
Attention Score	Genome Res	PC14	0.0495186375120693	0.0615953447379556	0.803934740892123	0.421743288529043	-0.0712060197896524	0.170243294813791
Attention Score	Genome Res	PC15	0.0426105029037068	0.0638518874932783	0.667333489682547	0.504807835321183	-0.0825368969280221	0.167757902735436
Attention Score	Gigascience	(Intercept)	3.78328488659795	0.499608696559615	7.57249606071762	3.63783606876911e-13	2.8040698349781	4.76249993821779
Attention Score	Gigascience	preprintTRUE	0.445984739210729	0.28984040280727	1.53872522564526	0.124821037594421	-0.122092011556102	1.01406148997756
Attention Score	Gigascience	preprint_age	-0.0686271297966036	0.364253367340996	-0.18840492895803	0.850673998881079	-0.782550611032394	0.645296351439187
Attention Score	Gigascience	ns(pub_date, df = 3)1	-0.59904942755007	0.284128080937457	-2.10837811445302	0.0357449416489427	-1.15593023318397	-0.0421686219161733
Attention Score	Gigascience	ns(pub_date, df = 3)2	-1.0628097038797	0.768898625799471	-1.38224945164212	0.167821526342086	-2.569823318209	0.444203910449607
Attention Score	Gigascience	ns(pub_date, df = 3)3	-0.341613012812751	0.274072015829936	-1.24643521805132	0.213480748808271	-0.878784293009719	0.195558267384216
Attention Score	Gigascience	log2(authors)	0.00107992342951918	0.0682548217501554	0.0158219361186263	0.987385923284949	-0.132697068971987	0.134856915831025
Attention Score	Gigascience	log2(references + 1)	0.0825881616259122	0.0851725297166368	0.969657258046431	0.33292111387069	-0.0843469290908633	0.249523252342688
Attention Score	Gigascience	any_affil_usaTRUE	0.00587100636102017	0.149638663766081	0.0392345548487246	0.968726895234469	-0.287415385315197	0.299157398037238
Attention Score	Gigascience	any_affil_nature_indexTRUE	0.183853518129701	0.147817015413442	1.24379130247939	0.214451235062338	-0.105862508382847	0.473569544642249
Attention Score	Gigascience	last_author_pub_age	-0.0166957212248873	0.013486329139307	-1.237973732691	0.216597897811566	-0.0431284406215821	0.00973699817180742
Attention Score	Gigascience	PC1	0.0577724082363644	0.0405016906579624	1.42641967033558	0.154684085915966	-0.0216094467662243	0.137154263238953
Attention Score	Gigascience	PC2	-0.0937248835403665	0.051721736702842	-1.81209853951437	0.0708715687692434	-0.1950976246958	0.00764785761506709
Attention Score	Gigascience	PC3	-0.00370650613714068	0.0517770325438175	-0.0715859128080382	0.942974425310265	-0.105187625149381	0.0977746128751
Attention Score	Gigascience	PC4	0.105177851546162	0.0525060164011394	2.00315809035324	0.0459703610269528	0.00226795042825977	0.208087752664065
Attention Score	Gigascience	PC5	-0.0275951787765894	0.0575608373294386	-0.479408918578678	0.631962439197566	-0.140412346862258	0.085221989309079
Attention Score	Gigascience	PC6	-0.163071007955255	0.0584020499955518	-2.79221376591533	0.00553725099867039	-0.277536922569844	-0.0486050933406662
Attention Score	Gigascience	PC7	0.00423754124335717	0.0599107393598867	0.0707309121642124	0.943654376316471	-0.113185350189187	0.121660432675901
Attention Score	Gigascience	PC8	0.0108103602515428	0.0628485034589598	0.172006645450229	0.863536789118005	-0.112370443010259	0.133991163513345
Attention Score	Gigascience	PC9	0.146351894488578	0.0631634214328194	2.31703557484197	0.0211079620025807	0.0225538633399269	0.27014992563723
Attention Score	Gigascience	PC10	-0.0174644661802522	0.0692345062500036	-0.252250895199405	0.801002762822108	-0.153161604917672	0.118232672557168
Attention Score	Gigascience	PC11	0.00240385989817229	0.0677929024600096	0.0354588726982195	0.971735086200099	-0.130467787330883	0.135275507127228
Attention Score	Gigascience	PC12	0.0236141888032196	0.0699528628112187	0.337572871991631	0.735897778327515	-0.11349090292224	0.16071928052868
Attention Score	Gigascience	PC13	0.0678065991038005	0.0709790308251102	0.955304662737275	0.34011662485525	-0.0713097449709737	0.206922943178575
Attention Score	Gigascience	PC14	0.115614229666672	0.0754101481129308	1.53313887533457	0.126191120212987	-0.0321869447035036	0.263415404036847
Attention Score	Gigascience	PC15	-0.0335512809983025	0.0775593739321738	-0.432588342289138	0.665593876533662	-0.185564860568838	0.118462298572233
Attention Score	ISME J	(Intercept)	3.09147989195367	0.48233901154425	6.40935072213221	2.38614240897709e-10	2.1461128009883	4.03684698291905
Attention Score	ISME J	preprintTRUE	0.340733391619456	0.425917155024695	0.799999219565833	0.423928382748486	-0.494048892626709	1.17551567586562
Attention Score	ISME J	preprint_age	-0.113017883447118	0.634184269988632	-0.178209849716304	0.858599424404856	-1.35599621218666	1.12996044529243
Attention Score	ISME J	ns(pub_date, df = 3)1	1.10809051425213	0.194017803157348	5.71128265664091	1.53600640598025e-08	0.727822607704148	1.48835842080012
Attention Score	ISME J	ns(pub_date, df = 3)2	2.05573226948557	0.393296780683285	5.22692371372602	2.15643460763351e-07	1.28488474411078	2.82657979486035
Attention Score	ISME J	ns(pub_date, df = 3)3	0.890436160005781	0.15675561338799	5.6804100393001	1.82883613362172e-08	0.583200803390837	1.19767151662073
Attention Score	ISME J	log2(authors)	0.104663270686924	0.0583804446077566	1.79277960951016	0.0733534861296937	-0.00976029814571483	0.219086839519562
Attention Score	ISME J	log2(references + 1)	-0.100787710423162	0.075558205943782	-1.33390819917232	0.182581028376986	-0.248879072809435	0.0473036519631115
Attention Score	ISME J	any_affil_usaTRUE	0.180039249069338	0.0909962344713933	1.97853515714364	0.0481816006867663	0.0016899067766446	0.358388591362031
Attention Score	ISME J	any_affil_nature_indexTRUE	0.0954699318814465	0.094548748686271	1.00974294433269	0.312897600631913	-0.0898422103269734	0.280782074089866
Attention Score	ISME J	last_author_pub_age	-0.0100565242070623	0.00638712870666976	-1.57449844349633	0.115733738177881	-0.0225750664367569	0.00246201802263236
Attention Score	ISME J	PC1	-0.0335580203143389	0.028090768767596	-1.19462804994677	0.232556102781328	-0.0886149153968696	0.0214988747681918
Attention Score	ISME J	PC2	0.0555141277700295	0.0294615155716344	1.88429300709427	0.0598566404127044	-0.00222938168033986	0.113257637220399
Attention Score	ISME J	PC3	-0.181701204444596	0.0319091394393216	-5.69433107997536	1.69062722624215e-08	-0.244241968523333	-0.119160440365859
Attention Score	ISME J	PC4	0.0650076520977394	0.0337604557811317	1.92555611568702	0.054483614274973	-0.00116162533493581	0.131176929530415
Attention Score	ISME J	PC5	0.0262102485087441	0.0350066224608584	0.748722574937079	0.454225645259954	-0.0424014707349293	0.0948219677524174
Attention Score	ISME J	PC6	0.0588974213764338	0.0384331094264522	1.53246568532643	0.125769016777105	-0.0164300889132993	0.134224931666167
Attention Score	ISME J	PC7	0.0222375355744116	0.0383614759621218	0.579684045430602	0.56227692507441	-0.0529495757051462	0.0974246468539694
Attention Score	ISME J	PC8	0.0566830391691152	0.0411940716362174	1.37599991740754	0.16917373040426	-0.0240558576144338	0.137421935952664
Attention Score	ISME J	PC9	0.0514681819146021	0.0413362560364971	1.24510990712752	0.213424698467272	-0.0295493911726586	0.132485755001863
Attention Score	ISME J	PC10	0.133022802384683	0.0421424020853475	3.15650736081164	0.00165136529538235	0.0504252120753965	0.21562039269397
Attention Score	ISME J	PC11	0.040315916140082	0.0433543952258255	0.92991531608464	0.352671404296922	-0.0446571370740513	0.125288969354215
Attention Score	ISME J	PC12	-0.0538698764060366	0.043822488660076	-1.22927469555407	0.219299291985105	-0.1397603758927	0.0320206230806272
Attention Score	ISME J	PC13	-0.0206910719000717	0.0441466031158572	-0.468690011001992	0.639407969291567	-0.107216824046936	0.0658346802467922
Attention Score	ISME J	PC14	-0.00261445657659891	0.0454838033828643	-0.0574810456063112	0.954175128051236	-0.0917610730869139	0.0865321599337161
Attention Score	ISME J	PC15	-0.0440237488112951	0.0463902220176396	-0.948987672327919	0.342888905714091	-0.134946913200686	0.0468994155780954
Attention Score	J Biol Chem	(Intercept)	0.195561557317242	0.189408270018955	1.03248689879102	0.301877048653491	-0.175671830293947	0.566794944928432
Attention Score	J Biol Chem	preprintTRUE	0.419386082677847	0.267476799172158	1.56793443011076	0.116938210201885	-0.104858810399635	0.943630975755329
Attention Score	J Biol Chem	preprint_age	0.59627500921208	0.599087585707254	0.995305233220861	0.319619629483185	-0.577915082359189	1.77046510078335
Attention Score	J Biol Chem	ns(pub_date, df = 3)1	0.458299232387394	0.0723293791204375	6.33628047082041	2.48844200413314e-10	0.316536254287193	0.600062210487595
Attention Score	J Biol Chem	ns(pub_date, df = 3)2	0.668545821744055	0.130657440594851	5.11678338945209	3.18426602372557e-07	0.412461943865966	0.924629699622144
Attention Score	J Biol Chem	ns(pub_date, df = 3)3	0.908955617336868	0.0575273442200779	15.8004098687321	2.35191618109265e-55	0.796204094539277	1.02170714013446
Attention Score	J Biol Chem	log2(authors)	0.0533999299321219	0.0211643459478606	2.52310796958598	0.0116525681250619	0.0119185741179688	0.0948812857462749
Attention Score	J Biol Chem	log2(references + 1)	0.109288951481877	0.0317519338367309	3.44196205635358	0.000580632534492956	0.0470563047223858	0.171521598241368
Attention Score	J Biol Chem	any_affil_usaTRUE	0.0184595486906135	0.0319985869104646	0.576886371334624	0.564033362601603	-0.0442565292100719	0.0811756265912989
Attention Score	J Biol Chem	any_affil_nature_indexTRUE	0.0567853370207931	0.0323796485547435	1.7537354343049	0.0795162949984963	-0.00667760797856856	0.120248282020155
Attention Score	J Biol Chem	last_author_pub_age	0.000633633787842556	0.00179356234117106	0.353282277006797	0.723886662989296	-0.00288168380488007	0.00414895138056518
Attention Score	J Biol Chem	PC1	0.0141888351832261	0.00863928586288371	1.64236204339348	0.100556509388141	-0.00274385396017201	0.0311215243266242
Attention Score	J Biol Chem	PC2	0.00921529401063276	0.0112314035121362	0.820493538556873	0.411960632794566	-0.0127978523689909	0.0312284403902565
Attention Score	J Biol Chem	PC3	-0.0406851704666762	0.0119930233256452	-3.39240317991189	0.00069637169526509	-0.0641910642506895	-0.0171792766826629
Attention Score	J Biol Chem	PC4	-0.00224784638953742	0.0130982930224139	-0.171613689332716	0.863745829285027	-0.0279200289724209	0.0234243361933461
Attention Score	J Biol Chem	PC5	0.0367424751854548	0.0144706662468965	2.5391004504257	0.0111336251050108	0.00838049050923829	0.0651044598616713
Attention Score	J Biol Chem	PC6	0.00129117878838511	0.0143799852347145	0.0897899940305983	0.928456473850327	-0.0268930743698731	0.0294754319466433
Attention Score	J Biol Chem	PC7	0.0150669579787379	0.0145566545908683	1.03505636440599	0.300675635057242	-0.0134635607547535	0.0435974767122293
Attention Score	J Biol Chem	PC8	0.0543699149965872	0.0147788508993947	3.67890002860871	0.000235866596032688	0.0254038995008862	0.0833359304922883
Attention Score	J Biol Chem	PC9	-0.0107439232118221	0.0148459910933542	-0.723691880472132	0.469277269114319	-0.0398415310695988	0.0183536846459547
Attention Score	J Biol Chem	PC10	0.0277024021372544	0.0151995359216314	1.82258210251204	0.0684061171777662	-0.00208814085086608	0.0574929451253748
Attention Score	J Biol Chem	PC11	0.0138543201956167	0.0152885872637056	0.906187076454489	0.364865668911283	-0.0161107602157441	0.0438194006069775
Attention Score	J Biol Chem	PC12	-0.00536281641785284	0.0156606939234156	-0.342437981616795	0.732030811244967	-0.0360572124806527	0.025331579644947
Attention Score	J Biol Chem	PC13	-0.0381339802387782	0.0157136659530621	-2.42680354493262	0.015255677016896	-0.0689321995718733	-0.00733576090568317
Attention Score	J Biol Chem	PC14	-0.0510698199326101	0.015880012515724	-3.21598108830468	0.00130545477239322	-0.0821940725374745	-0.0199455673277457
Attention Score	J Biol Chem	PC15	0.0225954816982481	0.0163135225485921	1.38507680551176	0.166069775978308	-0.00937843495797451	0.0545693983544707
Attention Score	J Cell Biol	(Intercept)	1.85591469329002	0.656064485229944	2.82886017315743	0.00477615350650847	0.57005193070352	3.14177745587652
Attention Score	J Cell Biol	preprintTRUE	0.575290992039784	0.329212443969394	1.74747644743729	0.0808988291797636	-0.0699535414026387	1.22053552548221
Attention Score	J Cell Biol	preprint_age	0.645512625012289	0.577715767427482	1.11735331006578	0.264144148039745	-0.486789472446493	1.77781472247107
Attention Score	J Cell Biol	ns(pub_date, df = 3)1	1.6042671780177	0.215564240483866	7.44217674701836	2.33023795256886e-13	1.18176903031459	2.02676532572081
Attention Score	J Cell Biol	ns(pub_date, df = 3)2	0.843112030058949	0.459315200337474	1.83558486511983	0.0667518364269325	-0.0571292201542991	1.7433532802722
Attention Score	J Cell Biol	ns(pub_date, df = 3)3	1.67533600383405	0.192531755666387	8.70160871922354	1.55997496493866e-17	1.29798069684767	2.05269131082043
Attention Score	J Cell Biol	log2(authors)	0.21648015046259	0.0636194787385011	3.40273379718185	0.000696840996179204	0.091788263419916	0.341172037505264
Attention Score	J Cell Biol	log2(references + 1)	0.064212015472924	0.105564945516477	0.608270246896509	0.54316309815209	-0.142691475769304	0.271115506715152
Attention Score	J Cell Biol	any_affil_usaTRUE	0.148607439012572	0.104298008171302	1.42483487094494	0.154554714826409	-0.0558129006624444	0.353027778687588
Attention Score	J Cell Biol	any_affil_nature_indexTRUE	0.0555190133222103	0.11250346434359	0.493487144117207	0.621789897354017	-0.164983724927212	0.276021751571633
Attention Score	J Cell Biol	last_author_pub_age	-0.0126443611134412	0.00576674810496116	-2.19263281199385	0.0285914880028596	-0.0239469797070797	-0.00134174251980273
Attention Score	J Cell Biol	PC1	0.00430467793122212	0.0274478246341839	0.156831296781932	0.87541329610641	-0.0494920698057495	0.0581014256681937
Attention Score	J Cell Biol	PC2	0.0685926407387451	0.0288869071934082	2.37452352650607	0.0177823154426231	0.011975343014914	0.125209938462576
Attention Score	J Cell Biol	PC3	0.0205485522666049	0.0287320967742944	0.715177608791468	0.474686445003568	-0.0357653226113316	0.0768624271445415
Attention Score	J Cell Biol	PC4	-0.00363864980696992	0.0301704828795018	-0.120602968852118	0.904032676882142	-0.0627717096469757	0.0554944100330359
Attention Score	J Cell Biol	PC5	-0.00767486381788029	0.0350585329563836	-0.218915715253363	0.826765782989251	-0.0763883257632026	0.061038598127442
Attention Score	J Cell Biol	PC6	-0.0389820257669176	0.0362439871366873	-1.07554463089021	0.282421785839777	-0.110018935210958	0.0320548836771224
Attention Score	J Cell Biol	PC7	0.086404779097474	0.0386546305873521	2.23530215615994	0.0256443157572219	0.0106430953105636	0.162166462884384
Attention Score	J Cell Biol	PC8	-0.105807135930791	0.0405834487571447	-2.60714993848728	0.00928238786993635	-0.185349233863222	-0.0262650379983609
Attention Score	J Cell Biol	PC9	-0.034395616964518	0.0416157400513026	-0.826504993594158	0.408738707041833	-0.115960968655052	0.0471697347260161
Attention Score	J Cell Biol	PC10	0.0248681824415923	0.0427542312478569	0.581654299838192	0.560946517969611	-0.0589285709909041	0.108664935874089
Attention Score	J Cell Biol	PC11	-0.0442000828551398	0.044015683591567	-1.00418939906248	0.315559655952662	-0.130469237449522	0.0420690717392421
Attention Score	J Cell Biol	PC12	-0.100301267468805	0.044340485626542	-2.26206966503689	0.0239330110478965	-0.187207022353843	-0.0133955125837665
Attention Score	J Cell Biol	PC13	-0.0882771773787291	0.0446149446799373	-1.97864590020272	0.0481631269655461	-0.175720862123653	-0.000833492633805139
Attention Score	J Cell Biol	PC14	0.104520204949443	0.0457022859979913	2.28697980127378	0.0224304669047278	0.0149453703822312	0.194095039516655
Attention Score	J Cell Biol	PC15	0.0669856520880949	0.0465383005221323	1.43936609924633	0.150397644729187	-0.024227740836986	0.158199045013176
Attention Score	J Neurophysiol	(Intercept)	0.442720170107005	0.299766505338911	1.4768833816389	0.139889748514598	-0.144811384128694	1.0302517243427
Attention Score	J Neurophysiol	preprintTRUE	0.276781016390467	0.309243529005113	0.895026056910282	0.370898243985429	-0.329325162911622	0.882887195692556
Attention Score	J Neurophysiol	preprint_age	0.0970337495749918	0.626292668163103	0.154933555041589	0.876891857176673	-1.13047732380618	1.32454482295617
Attention Score	J Neurophysiol	ns(pub_date, df = 3)1	0.653283843074898	0.127677785760204	5.11666018630565	3.45749430017268e-07	0.403039981359077	0.903527704790719
Attention Score	J Neurophysiol	ns(pub_date, df = 3)2	0.898621705251506	0.236625464500594	3.79765426830995	0.000151140021455858	0.434844317005281	1.36239909349773
Attention Score	J Neurophysiol	ns(pub_date, df = 3)3	0.957392883956434	0.121969540210395	7.84944242886342	7.28513489807801e-15	0.718336977933151	1.19644878997972
Attention Score	J Neurophysiol	log2(authors)	0.172905185727648	0.0428210839241799	4.0378516815174	5.6311198516851e-05	0.0889774034572879	0.256832967998007
Attention Score	J Neurophysiol	log2(references + 1)	0.0416261619846134	0.0488125649023319	0.852775552112503	0.393902377209695	-0.0540447072169809	0.137297031186208
Attention Score	J Neurophysiol	any_affil_usaTRUE	0.166631281627992	0.0639419969700458	2.60597556416719	0.00924028142508602	0.0413072704671326	0.291955292788851
Attention Score	J Neurophysiol	any_affil_nature_indexTRUE	0.116441537174171	0.062120570182791	1.87444411459102	0.0610384124367525	-0.00531254308319194	0.238195617431534
Attention Score	J Neurophysiol	last_author_pub_age	-0.00723157246612157	0.00350505746117238	-2.06318228623354	0.0392449099686261	-0.0141013588537628	-0.000361786078480301
Attention Score	J Neurophysiol	PC1	0.12287455327681	0.0131879358706356	9.31719372023969	3.52857867891058e-20	0.0970266739399399	0.148722432613679
Attention Score	J Neurophysiol	PC2	0.0258773599403667	0.0186855753701174	1.38488429859916	0.166267240399179	-0.010745694815472	0.0625004146962055
Attention Score	J Neurophysiol	PC3	-0.0740451987323304	0.0208063127903598	-3.55878523400061	0.000382674954225738	-0.114824822452511	-0.0332655750121502
Attention Score	J Neurophysiol	PC4	0.0126113929563381	0.0217091913514352	0.580924123436056	0.561367613081548	-0.0299378402259634	0.0551606261386396
Attention Score	J Neurophysiol	PC5	-0.0292106484255741	0.023701151398836	-1.23245693570012	0.217946685924884	-0.0756640515594237	0.0172427547082755
Attention Score	J Neurophysiol	PC6	0.0270688445260285	0.0235973849149753	1.14711204752397	0.251494668984233	-0.0191811800366518	0.0733188690887088
Attention Score	J Neurophysiol	PC7	-0.0107727370276788	0.0247976028170238	-0.43442654950031	0.664033150292087	-0.0593751454519744	0.0378296713966168
Attention Score	J Neurophysiol	PC8	-0.0392835053196922	0.0252068709903912	-1.55844433585854	0.1193117074981	-0.0886880646238065	0.0101210539844221
Attention Score	J Neurophysiol	PC9	0.0394604320729748	0.0265154399392366	1.48820582134044	0.136879718162111	-0.0125088752421639	0.0914297393881134
Attention Score	J Neurophysiol	PC10	0.00659847804884713	0.0268311182540627	0.245926315346473	0.805768580729147	-0.045989547394051	0.0591865034917453
Attention Score	J Neurophysiol	PC11	-0.00138694167213503	0.0272775596392559	-0.0508455188248966	0.95945451594236	-0.05484997615122	0.05207609280695
Attention Score	J Neurophysiol	PC12	-0.0129565626480525	0.0278043602222711	-0.465990317506908	0.641281366575878	-0.0674521072968819	0.0415389820007769
Attention Score	J Neurophysiol	PC13	0.00511120944714824	0.0285976668339325	0.178728197542449	0.858172151808364	-0.050939187589235	0.0611616064835315
Attention Score	J Neurophysiol	PC14	0.0179407063514918	0.0293637268530805	0.610981924782808	0.541292183934037	-0.0396111407324177	0.0754925534354012
Attention Score	J Neurophysiol	PC15	0.0500537667432433	0.0298040387939403	1.67942898911473	0.0932498735327544	-0.00836107588671429	0.108468609373201
Attention Score	J Neurosci	(Intercept)	1.38539882240366	0.144325429240681	9.59913183485727	1.51485092054817e-21	1.10252617903864	1.66827146576868
Attention Score	J Neurosci	preprintTRUE	0.221818978751393	0.344630852233339	0.643642254644127	0.519851149726001	-0.453645079587296	0.897283037090082
Attention Score	J Neurosci	preprint_age	0.455190585226256	0.630303064128021	0.722177332036263	0.470235461539761	-0.780180719809905	1.69056189026242
Attention Score	J Neurosci	ns(pub_date, df = 3)1	0.589744880476312	0.132741835843573	4.44279587312085	9.1647505518576e-06	0.329575662981181	0.849914097971443
Attention Score	J Neurosci	ns(pub_date, df = 3)2	2.14161109382495	0.228779107369911	9.36104314089394	1.39828814427295e-20	1.6932122829647	2.5900099046852
Attention Score	J Neurosci	ns(pub_date, df = 3)3	0.35896251064209	0.117736297074773	3.04886869691611	0.00231485337774533	0.128203608702427	0.589721412581753
Attention Score	J Neurosci	log2(authors)	0.100101828156385	0.040696720276144	2.45970258726385	0.0139549866069094	0.0203377221262413	0.179865934186528
Attention Score	J Neurosci	log2(references + 1)	0.00912460232017584	0.0132935244314329	0.686394519921331	0.492511483659699	-0.0169302267930359	0.0351794314333875
Attention Score	J Neurosci	any_affil_usaTRUE	0.239963178182913	0.0776179346033131	3.09159448018435	0.002007086888987	0.0878348218060337	0.392091534559792
Attention Score	J Neurosci	any_affil_nature_indexTRUE	0.0739187396689773	0.0662134729131361	1.11637007419849	0.264343183332892	-0.055857282532088	0.203694761870042
Attention Score	J Neurosci	last_author_pub_age	-0.00596296904956501	0.00367698014177451	-1.62170281580234	0.104960347417	-0.013169717699312	0.00124377960018202
Attention Score	J Neurosci	PC1	-0.208941382610457	0.0128020993035313	-16.3208687619556	1.07224736037697e-57	-0.234033036171884	-0.18384972904903
Attention Score	J Neurosci	PC2	0.0425694267412531	0.02023675188271	2.10357012765591	0.0354897396435643	0.00290612188706844	0.0822327315954378
Attention Score	J Neurosci	PC3	-0.169310621774308	0.0230999315339449	-7.32948586992602	2.87670934568526e-13	-0.214585655626181	-0.124035587922435
Attention Score	J Neurosci	PC4	-0.0160212794835675	0.0237559395726376	-0.674411527044841	0.500095879651973	-0.0625820654648471	0.0305395064977121
Attention Score	J Neurosci	PC5	-0.112966278415434	0.02547776227774	-4.43391680886093	9.54835299063478e-06	-0.162901774886478	-0.0630307819443907
Attention Score	J Neurosci	PC6	-0.0708353686224247	0.025498114492597	-2.77806300708982	0.00549861421028564	-0.120810754701594	-0.0208599825432558
Attention Score	J Neurosci	PC7	0.0899044470906121	0.026222396987234	3.4285365725483	0.000614109346743695	0.0385094934073218	0.141299400773902
Attention Score	J Neurosci	PC8	0.0231719180806153	0.0265725202189654	0.872025607269157	0.383256400979667	-0.0289092645270193	0.0752531006882498
Attention Score	J Neurosci	PC9	0.0915400934049803	0.0273254336257416	3.34999600221334	0.00081700022067755	0.037983227636587	0.145096959173374
Attention Score	J Neurosci	PC10	-0.0149483096259385	0.0280416785190969	-0.533074709338761	0.594016943018562	-0.0699089895894189	0.0400123703375418
Attention Score	J Neurosci	PC11	-0.143929972082567	0.0290390792124373	-4.95642341238294	7.53354839111556e-07	-0.20084552148315	-0.0870144226819841
Attention Score	J Neurosci	PC12	-0.0701922655605654	0.0294981547875535	-2.37954767225584	0.0173891281846618	-0.128007586554558	-0.0123769445665727
Attention Score	J Neurosci	PC13	-0.157465267516529	0.02994073670939	-5.25923156283407	1.53657701565431e-07	-0.216148033137529	-0.0987825018955279
Attention Score	J Neurosci	PC14	0.0711952544247365	0.0302049884593825	2.35706941323533	0.0184765764812615	0.0119945648908988	0.130395943958574
Attention Score	J Neurosci	PC15	0.127336764833704	0.0307731567566936	4.13791688127694	3.59025703269222e-05	0.0670224858999791	0.187651043767429
Attention Score	J Virol	(Intercept)	0.43085818807615	0.282895482233778	1.52302958207052	0.127851018591195	-0.123606768491145	0.985323144643446
Attention Score	J Virol	preprintTRUE	0.700916231596904	0.388238026004644	1.80537758964528	0.0711104236976654	-0.0600163168011227	1.46184877999493
Attention Score	J Virol	preprint_age	1.04079821078304	1.44890696921584	0.71833335948845	0.472604687601753	-1.79900726582909	3.88060368739518
Attention Score	J Virol	ns(pub_date, df = 3)1	0.230080768388078	0.10664538987165	2.15743754760507	0.0310464784734033	0.0210596451224125	0.439101891653744
Attention Score	J Virol	ns(pub_date, df = 3)2	1.01242067906641	0.203548397071531	4.97385729208479	6.9125061320639e-07	0.613473151695346	1.41136820643747
Attention Score	J Virol	ns(pub_date, df = 3)3	0.28019831047663	0.090647834312738	3.09106458638534	0.00201172077342005	0.102531819947109	0.457864801006151
Attention Score	J Virol	log2(authors)	0.183465046839402	0.0323404994688631	5.67291939990101	1.53005486808419e-08	0.120078832638394	0.246851261040411
Attention Score	J Virol	log2(references + 1)	-0.0286962658389189	0.0464000019031553	-0.618453979782435	0.536320543986603	-0.119638598451693	0.0622460667738554
Attention Score	J Virol	any_affil_usaTRUE	0.137666932540795	0.050645080607156	2.71826860359154	0.00659815854014591	0.0384043985566411	0.236929466524949
Attention Score	J Virol	any_affil_nature_indexTRUE	0.142307160869777	0.0508937357567897	2.7961626073164	0.00520249002193213	0.0425572717477706	0.242057049991783
Attention Score	J Virol	last_author_pub_age	-0.001870738316052	0.00277854568236209	-0.673279668542882	0.500818450535613	-0.00731658778288097	0.00357511115077696
Attention Score	J Virol	PC1	-0.0294364159318507	0.0150617487883391	-1.95438234600224	0.0507437853284399	-0.0589569011011852	8.4069237483813e-05
Attention Score	J Virol	PC2	-0.067679478210766	0.0162403719592569	-4.1673601060713	3.16381342196432e-05	-0.0995100223464437	-0.0358489340750884
Attention Score	J Virol	PC3	-0.119433722385659	0.0168290913529164	-7.09686101769014	1.56770622097647e-12	-0.15241813532991	-0.0864493094414082
Attention Score	J Virol	PC4	0.0155668513522401	0.0173157287614763	0.89900064656088	0.368720575320904	-0.0183713533863179	0.049505056090798
Attention Score	J Virol	PC5	0.11129836225097	0.0190506317018418	5.8422399841056	5.672030579254e-09	0.0739598102326231	0.148636914269317
Attention Score	J Virol	PC6	0.0797861296740641	0.0202157809183366	3.94672508553426	8.09464553156096e-05	0.0401639271547722	0.119408332193356
Attention Score	J Virol	PC7	0.0104750933119225	0.0203282900943804	0.515296331530526	0.606381881762395	-0.0293676231403453	0.0503178097641904
Attention Score	J Virol	PC8	-0.0349283436710533	0.0206729785340438	-1.68956513032382	0.0912094830928632	-0.0754466370509488	0.00558994970884221
Attention Score	J Virol	PC9	-0.0367051213607305	0.0212311946798969	-1.7288297674311	0.0839369003707569	-0.0783174982820868	0.00490725556062578
Attention Score	J Virol	PC10	-0.0776363250964801	0.0216997227828918	-3.57775653971437	0.000351740709370834	-0.120167000225451	-0.0351056499675088
Attention Score	J Virol	PC11	-0.0240770438466783	0.0221080478472704	-1.08906240899288	0.276209123991724	-0.0674080213958166	0.01925393370246
Attention Score	J Virol	PC12	-0.0440667260119095	0.0225452162274917	-1.95459318585618	0.0507188629774308	-0.0882545378414612	0.000121085817642155
Attention Score	J Virol	PC13	-0.0606227187347975	0.023018108594429	-2.63369679077237	0.00848711830800744	-0.10573738257211	-0.0155080548974848
Attention Score	J Virol	PC14	0.0332428201355087	0.0236394233499385	1.40624496813689	0.159749378916531	-0.0130895982456659	0.0795752385166833
Attention Score	J Virol	PC15	-0.0146362232921363	0.0243501707183784	-0.601072717781382	0.547834515776434	-0.0623616809175597	0.0330892343332871
Attention Score	MBio	(Intercept)	2.49608846249922	0.461254790715882	5.41151769638037	7.1490882415845e-08	1.59204568499953	3.40013123999891
Attention Score	MBio	preprintTRUE	0.681007467450243	0.271683111247369	2.50662422232857	0.0122827199273231	0.148518354197611	1.21349658070288
Attention Score	MBio	preprint_age	-0.00214223155782548	0.519220376750277	-0.00412586187628726	0.996708537109085	-1.01979547002769	1.01551100691204
Attention Score	MBio	ns(pub_date, df = 3)1	1.0889902769707	0.165926184467614	6.56310081778117	6.99856088788963e-11	0.763780931322031	1.41419962261937
Attention Score	MBio	ns(pub_date, df = 3)2	1.76346052100758	0.349681164518988	5.04305264320812	5.07651125911812e-07	1.07809803247833	2.44882300953682
Attention Score	MBio	ns(pub_date, df = 3)3	0.337082439503373	0.13882280971059	2.4281488049846	0.0152803874292233	0.0649947322379597	0.609170146768785
Attention Score	MBio	log2(authors)	0.148323518410677	0.0498134335925003	2.9775806988942	0.0029468707066225	0.0506909826230984	0.245956054198255
Attention Score	MBio	log2(references + 1)	-0.050258051011167	0.0768911864325056	-0.653625640895567	0.513442363151659	-0.200962007147433	0.100445905125099
Attention Score	MBio	any_affil_usaTRUE	0.0784587750757285	0.0903081017453388	0.86878999291753	0.385085954487338	-0.0985418518573143	0.255459402008771
Attention Score	MBio	any_affil_nature_indexTRUE	0.0402464331503365	0.088866059643577	0.452888687894529	0.650687307917695	-0.133927843199063	0.214420709499736
Attention Score	MBio	last_author_pub_age	-0.0118063698029206	0.00437669900944787	-2.69755123151822	0.00705493173533324	-0.0203845422326106	-0.00322819737323071
Attention Score	MBio	PC1	-0.153921032399411	0.0250188262979967	-6.15220836365674	9.52900312352035e-10	-0.202957030878948	-0.104885033919874
Attention Score	MBio	PC2	-0.247137312831681	0.0297369279087123	-8.31078830975257	1.9341002461425e-16	-0.305420620543621	-0.188854005119741
Attention Score	MBio	PC3	0.209369030044961	0.0304093972643037	6.88501084797002	8.13133411844341e-12	0.149767706615355	0.268970353474567
Attention Score	MBio	PC4	-0.101368337041325	0.0335084779654194	-3.02515492186596	0.00252271608034052	-0.167043747030301	-0.0356929270523494
Attention Score	MBio	PC5	-0.105445127121876	0.0355897102417703	-2.96279813478557	0.00309136407109087	-0.175199677415962	-0.03569057682779
Attention Score	MBio	PC6	-0.00455813012846828	0.0373921420037405	-0.121900749307497	0.902992183726263	-0.0778453817606069	0.0687291215036704
Attention Score	MBio	PC7	0.0626232790009089	0.0380629132990023	1.64525711705179	0.100103644221119	-0.0119786602118062	0.137225218213624
Attention Score	MBio	PC8	-0.00368866689409038	0.0386721192378301	-0.095383107178725	0.924021895310793	-0.0794846278060759	0.0721072940178951
Attention Score	MBio	PC9	0.059329445881431	0.0398170822553207	1.49005006195558	0.136398560095124	-0.0187106013084664	0.137369493071328
Attention Score	MBio	PC10	0.0187390833778614	0.0416709630740819	0.449691631665613	0.652990749525611	-0.0629345034484376	0.10041267020416
Attention Score	MBio	PC11	0.162040736799258	0.0428375457177286	3.78268021858676	0.000160578793079076	0.078080690006422	0.246000783592094
Attention Score	MBio	PC12	-0.00663594803993076	0.0426965835195791	-0.155421054635151	0.876508035483079	-0.0903197140012121	0.0770478179213506
Attention Score	MBio	PC13	0.0309179080271185	0.0434807024319861	0.711071953712829	0.477138240213913	-0.0543027027620773	0.116138518816314
Attention Score	MBio	PC14	0.0291968599084363	0.0455731690723605	0.640658977699749	0.521831542000634	-0.0601249101347449	0.118518629951618
Attention Score	MBio	PC15	-0.00297374706739902	0.0463903880274193	-0.0641026556113601	0.948896104367119	-0.0938972368299789	0.0879497426951808
Attention Score	Mol Biol Cell	(Intercept)	2.12132200428795	0.299319516458604	7.0871489750697	2.37063855449552e-12	1.53466653215914	2.70797747641676
Attention Score	Mol Biol Cell	preprintTRUE	0.764736656988837	0.260015227748597	2.94112257812932	0.00333510521033241	0.255116175169607	1.27435713880807
Attention Score	Mol Biol Cell	preprint_age	-0.275167210227885	0.447480743696828	-0.614925254558694	0.538724583425579	-1.15221335164887	0.601878931193095
Attention Score	Mol Biol Cell	ns(pub_date, df = 3)1	0.0668989544783064	0.153480271116864	0.435879829970901	0.663004950301197	-0.23391684924819	0.367714758204802
Attention Score	Mol Biol Cell	ns(pub_date, df = 3)2	1.39268142715948	0.297096574253107	4.68763879442449	3.09097817350006e-06	0.810382841693162	1.9749800126258
Attention Score	Mol Biol Cell	ns(pub_date, df = 3)3	-0.0724352797349773	0.139802563405773	-0.518125547703558	0.604469396321799	-0.346443268956669	0.201572709486714
Attention Score	Mol Biol Cell	log2(authors)	-0.0942557092111361	0.0447371553625661	-2.10687757071843	0.0353422764016948	-0.181938922492539	-0.00657249592973369
Attention Score	Mol Biol Cell	log2(references + 1)	-0.205286157120943	0.0482487122837242	-4.2547489332724	2.26132485401106e-05	-0.299851895497477	-0.110720418744408
Attention Score	Mol Biol Cell	any_affil_usaTRUE	0.135209079506947	0.075535065670468	1.79001736884449	0.0737116375242208	-0.0128369287770378	0.283255087790932
Attention Score	Mol Biol Cell	any_affil_nature_indexTRUE	0.141486379440678	0.0778873314388714	1.81655189395879	0.0695435283712457	-0.0111699850314443	0.2941427439128
Attention Score	Mol Biol Cell	last_author_pub_age	-0.00643769682457859	0.00409080304695975	-1.5737000170084	0.11582926785385	-0.0144555234644664	0.00158012981530924
Attention Score	Mol Biol Cell	PC1	-0.0238662674418819	0.0202817721090909	-1.17673481949757	0.239542564675612	-0.0636178103183491	0.0158852754345853
Attention Score	Mol Biol Cell	PC2	0.10533740605511	0.0221443864588888	4.75684464099603	2.21344202575779e-06	0.0619352061359519	0.148739605974269
Attention Score	Mol Biol Cell	PC3	0.0309676878300003	0.0242837172104377	1.27524495371284	0.202477673331345	-0.016627523313213	0.0785628989732135
Attention Score	Mol Biol Cell	PC4	-0.0182848026279407	0.025986697749683	-0.703621629961189	0.481809520651322	-0.0692177942944474	0.032648189038566
Attention Score	Mol Biol Cell	PC5	0.00627015241690296	0.0272595015158008	0.23001713414563	0.818118974740182	-0.0471574887905817	0.0596977936243876
Attention Score	Mol Biol Cell	PC6	0.120865992159814	0.0288147432759853	4.19458854802797	2.94177808335161e-05	0.0643901331151149	0.177341851204513
Attention Score	Mol Biol Cell	PC7	-0.0134003396073873	0.0296594878750405	-0.451806169541591	0.651493014843789	-0.0715318676423691	0.0447311884275945
Attention Score	Mol Biol Cell	PC8	-0.0514707491309782	0.030060892609545	-1.71221626049238	0.0871238573736435	-0.110389015988813	0.00744751772685635
Attention Score	Mol Biol Cell	PC9	0.0793808219003084	0.032373001350254	2.4520686556511	0.0143501908236254	0.0159309051823441	0.142830738618273
Attention Score	Mol Biol Cell	PC10	0.0169376131235063	0.0325021978842965	0.521122084844906	0.602381106737628	-0.0467655241481088	0.0806407503951213
Attention Score	Mol Biol Cell	PC11	0.0100732248385799	0.0333787019688704	0.30178599659071	0.762869253943294	-0.0553478288711023	0.075494278548262
Attention Score	Mol Biol Cell	PC12	-0.0444027578852185	0.0333214122568227	-1.33255930279866	0.182937937788076	-0.109711525822603	0.0209060100521655
Attention Score	Mol Biol Cell	PC13	0.00107808366218138	0.0340918939848962	0.0316228738320904	0.974778237076969	-0.0657408007129729	0.0678969680373357
Attention Score	Mol Biol Cell	PC14	0.0662225916723077	0.0345739543189122	1.91538957509652	0.055688287380626	-0.00154111359589328	0.133986296940509
Attention Score	Mol Biol Cell	PC15	-0.0259241518187422	0.0348175553580821	-0.744571281703284	0.45668161426126	-0.0941653063503126	0.0423170027128282
Attention Score	Mol Biol Evol	(Intercept)	2.32538617673028	0.371702926353503	6.25603408491531	6.25830167967632e-10	1.59686182812927	3.05391052533129
Attention Score	Mol Biol Evol	preprintTRUE	0.000454484851387043	0.27707058025871	0.00164032157785455	0.998691599114054	-0.542593873631298	0.543502843334072
Attention Score	Mol Biol Evol	preprint_age	0.338609732956751	0.440474462957258	0.768738624898688	0.442262529182921	-0.524704350549097	1.2019238164626
Attention Score	Mol Biol Evol	ns(pub_date, df = 3)1	-0.280377788570104	0.228011866073379	-1.22966314603939	0.219164326556608	-0.727272834121697	0.16651725698149
Attention Score	Mol Biol Evol	ns(pub_date, df = 3)2	2.18780694489202	0.429706372688094	5.09139981147094	4.38042217562391e-07	1.34559793049601	3.03001595928803
Attention Score	Mol Biol Evol	ns(pub_date, df = 3)3	0.457184126602897	0.229826553861605	1.98925719818346	0.0469937090534723	0.00673235834319685	0.907635894862597
Attention Score	Mol Biol Evol	log2(authors)	0.150550083759016	0.0545024659037668	2.76226187682659	0.00586443204237988	0.0437272135190108	0.257372953999021
Attention Score	Mol Biol Evol	log2(references + 1)	0.0461698212685752	0.0503951702503812	0.916155676013933	0.359845705809347	-0.0526028974169363	0.144942539954087
Attention Score	Mol Biol Evol	any_affil_usaTRUE	0.055131000349603	0.112948730998858	0.488106416619773	0.625600647031703	-0.166244444507661	0.276506445206867
Attention Score	Mol Biol Evol	any_affil_nature_indexTRUE	0.166226019221542	0.107178093402632	1.55093278807533	0.12129089900335	-0.0438391837792863	0.376291222222371
Attention Score	Mol Biol Evol	last_author_pub_age	-0.00467924507538809	0.00678981015672379	-0.689156981915664	0.490913000812239	-0.017987028444431	0.00862853829365479
Attention Score	Mol Biol Evol	PC1	-0.0818572046900292	0.0306979030125831	-2.6665405990916	0.00780960448625109	-0.142023988995596	-0.0216904203844628
Attention Score	Mol Biol Evol	PC2	-0.0596141106398522	0.0343547647559602	-1.7352501483658	0.0830598030787746	-0.12694821225888	0.00771999097917577
Attention Score	Mol Biol Evol	PC3	0.0475100804549782	0.0402984805276329	1.1789546363268	0.238746920893883	-0.031473490010871	0.126493650920827
Attention Score	Mol Biol Evol	PC4	-0.179215820684194	0.040089967641768	-4.47034086646348	8.87018951204493e-06	-0.257790713403436	-0.100640927964953
Attention Score	Mol Biol Evol	PC5	0.0325261453945332	0.0408919486035632	0.79541686090496	0.426593636360103	-0.0476206011261136	0.11267289191518
Attention Score	Mol Biol Evol	PC6	-0.0478143034504643	0.043562604850076	-1.09759973295952	0.272690871881787	-0.133195440029363	0.0375668331284345
Attention Score	Mol Biol Evol	PC7	0.0312442774817306	0.044225072823883	0.706483347266704	0.480081667831834	-0.0554352724667412	0.117923827430202
Attention Score	Mol Biol Evol	PC8	-0.02133169443563	0.0453764202710651	-0.470105272919302	0.63840067978157	-0.110267843914271	0.0676044550430109
Attention Score	Mol Biol Evol	PC9	-0.00991834730826389	0.0458865146336691	-0.216149502472483	0.828923196782344	-0.0998542633663254	0.0800175687497977
Attention Score	Mol Biol Evol	PC10	0.0871018400530374	0.0477739132446626	1.82320923988299	0.0686236415608968	-0.00653330930704238	0.180736989413117
Attention Score	Mol Biol Evol	PC11	-0.0394597730137254	0.0478275927941794	-0.825042004173951	0.409579765104056	-0.133200132357564	0.0542805863301137
Attention Score	Mol Biol Evol	PC12	0.0385153801861564	0.0495781314198651	0.776862279459043	0.437456670771548	-0.0586559718175729	0.135686732189886
Attention Score	Mol Biol Evol	PC13	-0.00296569073750918	0.0494706388486695	-0.0599485029207166	0.9522107741774	-0.0999263611730894	0.093994979698071
Attention Score	Mol Biol Evol	PC14	-0.00401985824586978	0.0523892936980171	-0.0767305295055339	0.93885601627999	-0.106700987069474	0.0986612705777349
Attention Score	Mol Biol Evol	PC15	-0.0136020248379243	0.051607423948711	-0.2635672117919	0.792177457649195	-0.114750717112288	0.0875466674364392
Attention Score	Mol Cell	(Intercept)	0.175665263810005	0.840701423427025	0.208950834285406	0.834523528251942	-1.47207924785852	1.82340977547853
Attention Score	Mol Cell	preprintTRUE	0.556375255714259	0.517466206357152	1.07519147893931	0.282513948363612	-0.45783987196233	1.57059038339085
Attention Score	Mol Cell	preprint_age	-0.134068716976285	0.872101216270335	-0.153730684552475	0.877848991054412	-1.84335569173972	1.57521825778715
Attention Score	Mol Cell	ns(pub_date, df = 3)1	0.55014692870971	0.241713039314793	2.27603330903977	0.0230267647406081	0.0763980770590007	1.02389578036042
Attention Score	Mol Cell	ns(pub_date, df = 3)2	1.92468544945392	0.483266818017472	3.98265591117894	7.24174236360905e-05	0.977499891216404	2.87187100769144
Attention Score	Mol Cell	ns(pub_date, df = 3)3	1.1268054067989	0.194694367911709	5.78756036389246	9.19575711992381e-09	0.745211457699162	1.50839935589864
Attention Score	Mol Cell	log2(authors)	0.291371409345351	0.0693109810790193	4.20382751490947	2.82734352542076e-05	0.155524382697336	0.427218435993366
Attention Score	Mol Cell	log2(references + 1)	0.319695121832622	0.142086128051386	2.25000938667992	0.0246362990434646	0.0412114281491601	0.598178815516084
Attention Score	Mol Cell	any_affil_usaTRUE	-0.0966710366710768	0.113655033101856	-0.850565382216216	0.395187421631507	-0.319430808212422	0.126088734870269
Attention Score	Mol Cell	any_affil_nature_indexTRUE	-0.0258012441807037	0.143299347181787	-0.180051372794969	0.857143875952917	-0.306662803665108	0.255060315303701
Attention Score	Mol Cell	last_author_pub_age	-0.00518840449790884	0.00625180522321887	-0.829905013457454	0.406764281894845	-0.0174417175737772	0.00706490857795954
Attention Score	Mol Cell	PC1	-0.00369439495427311	0.0269984768228632	-0.136837162278154	0.891183397658679	-0.0566104371645243	0.0492216472559781
Attention Score	Mol Cell	PC2	-0.0265217976625462	0.029458772585267	-0.900302196426554	0.368147450693822	-0.0842599309584254	0.0312163356333329
Attention Score	Mol Cell	PC3	0.139376770421277	0.0324168855225232	4.29951144826786	1.85638539659927e-05	0.0758408423061739	0.202912698536381
Attention Score	Mol Cell	PC4	-0.0752805750019242	0.0336320485781954	-2.23835829764859	0.0253879660640287	-0.141198178941489	-0.00936297106235963
Attention Score	Mol Cell	PC5	-0.0280028052789301	0.0346227274832291	-0.808798362072841	0.418797993542487	-0.0958621041926042	0.0398564936347441
Attention Score	Mol Cell	PC6	-0.064123874829404	0.0384343023080726	-1.6684022078875	0.095507418040283	-0.139453723124151	0.0112059734653428
Attention Score	Mol Cell	PC7	0.0462714076289736	0.0383276557359456	1.20725900764074	0.227580013045172	-0.0288494172253297	0.121392232483277
Attention Score	Mol Cell	PC8	-0.0642932738293487	0.0407457329385936	-1.57791427942265	0.114859602776451	-0.144153442912679	0.015566895253982
Attention Score	Mol Cell	PC9	-0.0519372898433766	0.0423074163273592	-1.2276166769794	0.219841465413533	-0.134858302123942	0.0309837224371893
Attention Score	Mol Cell	PC10	-0.0649366560779498	0.0423578915157067	-1.53304741464458	0.125538498664152	-0.14795659790979	0.0180832857538902
Attention Score	Mol Cell	PC11	0.00432130359321218	0.0441189074281853	0.0979467499336014	0.921991601157204	-0.0821501660032877	0.090792773189712
Attention Score	Mol Cell	PC12	0.0400848544750021	0.0448134541556818	0.894482588549132	0.371250419490723	-0.047747901692971	0.127917610642975
Attention Score	Mol Cell	PC13	-0.0233349065911629	0.0463030339855377	-0.503960638917341	0.61438531520045	-0.114087185577751	0.0674173723954251
Attention Score	Mol Cell	PC14	0.0503933560096698	0.0470255841722155	1.07161573634303	0.284116913909286	-0.0417750953198295	0.142561807339169
Attention Score	Mol Cell	PC15	0.084056654860985	0.0481912360794907	1.74423114448309	0.0813852680604937	-0.010396432225284	0.178509741947254
Attention Score	Mol Ecol	(Intercept)	2.30572824577237	0.583198185585252	3.95359296850096	8.08401747681562e-05	1.16268080617617	3.44877568536857
Attention Score	Mol Ecol	preprintTRUE	0.460619526428232	0.296605023597209	1.55297277450619	0.120656140002691	-0.12071563745595	1.04195469031241
Attention Score	Mol Ecol	preprint_age	-0.157063016448122	0.452359626525742	-0.347208298968706	0.728487134627599	-1.04367159249857	0.729545559602321
Attention Score	Mol Ecol	ns(pub_date, df = 3)1	0.719619734487261	0.184621270219967	3.89781596470368	0.000101664179444756	0.357768694076088	1.08147077489843
Attention Score	Mol Ecol	ns(pub_date, df = 3)2	0.788784231261893	0.361405003331299	2.18254928401978	0.0292350765163015	0.0804434408999683	1.49712502162382
Attention Score	Mol Ecol	ns(pub_date, df = 3)3	0.379784683614536	0.169611308076955	2.23914718847768	0.0253032177955376	0.0473526284129769	0.712216738816096
Attention Score	Mol Ecol	log2(authors)	0.166346731696105	0.0501688077015245	3.3157401843347	0.000937461094635932	0.0680176754538015	0.264675787938409
Attention Score	Mol Ecol	log2(references + 1)	-0.0789853773762175	0.0916950600067116	-0.861391850012817	0.389170085458449	-0.258704392549611	0.100733637797176
Attention Score	Mol Ecol	any_affil_usaTRUE	0.471150577364321	0.0809153323690427	5.82276020588378	7.17165762006547e-09	0.312559440123909	0.629741714604733
Attention Score	Mol Ecol	any_affil_nature_indexTRUE	-0.0428428002031346	0.0814999840022239	-0.52567863328618	0.599194940347021	-0.202579833588084	0.116894233181815
Attention Score	Mol Ecol	last_author_pub_age	-0.00577015965894203	0.00569751138288282	-1.01275087861649	0.311354538876154	-0.0169370767708994	0.00539675745301529
Attention Score	Mol Ecol	PC1	0.0362892081982312	0.024820252541338	1.46208053837453	0.143944049048156	-0.01235759286998	0.0849360092664424
Attention Score	Mol Ecol	PC2	-0.0157288239727535	0.0267438057555957	-0.588129607150714	0.556540363344297	-0.068145720063256	0.036688072117749
Attention Score	Mol Ecol	PC3	0.111164545778958	0.0315611202677199	3.52219898520695	0.000441764633963752	0.0493058867424895	0.173023204815426
Attention Score	Mol Ecol	PC4	0.0540494227482943	0.0340873789418796	1.58561392591818	0.113053230519085	-0.0127606123051586	0.120859457801747
Attention Score	Mol Ecol	PC5	-0.060488171762501	0.0337268971869573	-1.79346980622613	0.0731140550824468	-0.126591675559223	0.00561533203422053
Attention Score	Mol Ecol	PC6	0.0543696484550689	0.0345562800635602	1.57336519888904	0.115860711915272	-0.0133594159091885	0.122098712819326
Attention Score	Mol Ecol	PC7	0.0289824495180266	0.0361912121427121	0.800814556963184	0.423375180517218	-0.0419510228385377	0.0999159218745909
Attention Score	Mol Ecol	PC8	0.108815149793601	0.0372489903368374	2.9212912567455	0.00354183715657603	0.035808470272919	0.181821829314283
Attention Score	Mol Ecol	PC9	0.0814938994943778	0.0376524198068148	2.16437349611267	0.0306046515668043	0.00769651274223829	0.155291286246517
Attention Score	Mol Ecol	PC10	0.125139989036456	0.0381401980492354	3.28105241810523	0.00105972049180258	0.0503865744967299	0.199893403576182
Attention Score	Mol Ecol	PC11	-0.0790397355843279	0.0395768982873366	-1.99711799066422	0.046006059741277	-0.156609030847313	-0.00147044032134321
Attention Score	Mol Ecol	PC12	0.0184049281398151	0.0395440201108076	0.465428858478274	0.641696916943106	-0.0590999270812954	0.0959097833609256
Attention Score	Mol Ecol	PC13	-0.0629729260767764	0.041402929825855	-1.52097753327233	0.128491770930096	-0.144121177389891	0.0181753252363387
Attention Score	Mol Ecol	PC14	0.0733053093207495	0.0413325600669774	1.77354872773334	0.0763556393989009	-0.00770501979936471	0.154315638440864
Attention Score	Mol Ecol	PC15	0.0627921314448125	0.0420030525101091	1.49494209807013	0.135155397767411	-0.0195323387157461	0.145116601605371
Attention Score	Nat Genet	(Intercept)	3.57338825157102	0.632170434297054	5.65257098039466	2.27982009200092e-08	2.33435696825775	4.81241953488429
Attention Score	Nat Genet	preprintTRUE	-0.253376125760925	0.300372388261682	-0.843540004549907	0.399207047336503	-0.842095188704103	0.335342937182252
Attention Score	Nat Genet	preprint_age	0.637023415687904	0.342196767653227	1.86157052287953	0.0630714991744778	-0.0336699245384424	1.30771675591425
Attention Score	Nat Genet	ns(pub_date, df = 3)1	0.793370464410588	0.222151317876332	3.57130658505589	0.000378864196259616	0.357961882254869	1.22877904656631
Attention Score	Nat Genet	ns(pub_date, df = 3)2	0.932114283105453	0.456378900770834	2.04241318240412	0.0414748447365108	0.0376280742906391	1.82660049192027
Attention Score	Nat Genet	ns(pub_date, df = 3)3	0.647581316653076	0.189106255162748	3.42443096922286	0.000651045126206516	0.276939867282848	1.0182227660233
Attention Score	Nat Genet	log2(authors)	0.159059365739969	0.0405761839799042	3.92001785625639	9.70068539298226e-05	0.0795315065092856	0.238587224970652
Attention Score	Nat Genet	log2(references + 1)	0.20681367586054	0.108267230027117	1.910214898901	0.0565031079196922	-0.00538619569852242	0.419013547419603
Attention Score	Nat Genet	any_affil_usaTRUE	0.461309636652627	0.125776116559638	3.66770456324187	0.000262798362929869	0.214792978080424	0.707826295224829
Attention Score	Nat Genet	any_affil_nature_indexTRUE	-0.0319365574471006	0.184778592045609	-0.172836891403619	0.862828279772363	-0.394095942970514	0.330222828076313
Attention Score	Nat Genet	last_author_pub_age	-0.00141222716672349	0.00681368864204409	-0.207263237420228	0.835862968960328	-0.0147668115069995	0.0119423571735525
Attention Score	Nat Genet	PC1	0.109778902378072	0.0263382877603934	4.16803489189428	3.44674054475267e-05	0.0581568069532486	0.161400997802895
Attention Score	Nat Genet	PC2	-0.064748417135135	0.0332726350521089	-1.94599607256027	0.0520444758126094	-0.129961583508013	0.000464749237743395
Attention Score	Nat Genet	PC3	-0.0426681999879005	0.0332166054831227	-1.28454426234433	0.199365291388995	-0.107771550423497	0.0224351504476957
Attention Score	Nat Genet	PC4	0.0465686150515624	0.0366801025568846	1.26958791839097	0.204642219239937	-0.0253230649091669	0.118460295012292
Attention Score	Nat Genet	PC5	0.0048207702528884	0.0388402572101755	0.124117876635107	0.901256634015237	-0.0713047350293277	0.0809462755351045
Attention Score	Nat Genet	PC6	0.0203987149006858	0.0400467214964803	0.509372905906384	0.610647155734982	-0.0580914169313215	0.0988888467326931
Attention Score	Nat Genet	PC7	0.0924639379176609	0.0405136983650015	2.28228825432381	0.0227635830583166	0.0130585482417386	0.171869327593583
Attention Score	Nat Genet	PC8	0.0619254232311172	0.042965613032805	1.44127870778513	0.149941325107371	-0.0222856308868653	0.1461364773491
Attention Score	Nat Genet	PC9	-0.0238796735293309	0.0430432432602657	-0.554783323016341	0.579215410634616	-0.108242880097248	0.0604835330385862
Attention Score	Nat Genet	PC10	-0.0236943537544605	0.0441265826739026	-0.536963261568719	0.591459109112229	-0.110180866556139	0.0627921590472177
Attention Score	Nat Genet	PC11	-0.0531890727575077	0.0458758607449453	-1.1594130746281	0.246672735333505	-0.143104107577375	0.03672596206236
Attention Score	Nat Genet	PC12	0.0377691921842299	0.0464880210714132	0.812449988486501	0.416802386360349	-0.0533456548282792	0.128884039196739
Attention Score	Nat Genet	PC13	0.112848020465176	0.0469209443574176	2.40506711897278	0.0164212011376141	0.02088465940403	0.204811381526323
Attention Score	Nat Genet	PC14	-0.116058603851853	0.0484749182872829	-2.3941990611318	0.0169118983690732	-0.21106769784845	-0.0210495098552569
Attention Score	Nat Genet	PC15	0.125812651121123	0.0488580041626059	2.57506734623056	0.0102208333462221	0.0300527226059074	0.221572579636339
Attention Score	Nat Methods	(Intercept)	3.87856151275711	0.664165876662336	5.83974824519474	9.21859831317379e-09	2.57682031473846	5.18030271077576
Attention Score	Nat Methods	preprintTRUE	0.260848694587149	0.336089486315119	0.77612869550634	0.43802585925574	-0.397874594173052	0.91957198334735
Attention Score	Nat Methods	preprint_age	0.704327234787295	0.468245948005615	1.50418223112707	0.133141554243585	-0.213417959210525	1.62207242878511
Attention Score	Nat Methods	ns(pub_date, df = 3)1	0.710709076861328	0.275360114795784	2.58101678011143	0.0101237940318438	0.171013169082776	1.25040498463988
Attention Score	Nat Methods	ns(pub_date, df = 3)2	-0.998859305646678	0.547729609905021	-1.82363576404037	0.0687810296157202	-2.07238961432669	0.0746710030333354
Attention Score	Nat Methods	ns(pub_date, df = 3)3	0.0549624384105986	0.207414563631922	0.264988327956252	0.791123460367564	-0.351562636177059	0.461487512998257
Attention Score	Nat Methods	log2(authors)	0.111976276082961	0.0723350030855039	1.54802338157917	0.12222502733585	-0.0297977247862201	0.253750276952142
Attention Score	Nat Methods	log2(references + 1)	0.260368022780359	0.120109607553761	2.16775350517916	0.0306304256280908	0.0249575177777472	0.49577852778297
Attention Score	Nat Methods	any_affil_usaTRUE	0.30395121278982	0.140506590975184	2.16325234766747	0.0309766682516223	0.0285633548879591	0.579339070691681
Attention Score	Nat Methods	any_affil_nature_indexTRUE	-0.112843098416112	0.173343266474874	-0.650980570003674	0.515346580023727	-0.452589657669395	0.22690346083717
Attention Score	Nat Methods	last_author_pub_age	-0.01423185044247	0.00950300473295629	-1.49761584282013	0.134839835068598	-0.032857397463978	0.00439369657903798
Attention Score	Nat Methods	PC1	-0.0281137161594548	0.0370097943687829	-0.759629083029121	0.447820560369987	-0.100651580197503	0.0444241478785929
Attention Score	Nat Methods	PC2	-0.116778971727759	0.0423052789727882	-2.76038770014668	0.00597710788221982	-0.199695794870343	-0.033862148585174
Attention Score	Nat Methods	PC3	-0.00944711983827926	0.0446868900718292	-0.21140696573635	0.832652548649691	-0.097031814960165	0.0781375752836065
Attention Score	Nat Methods	PC4	0.124490650671046	0.0473887768881682	2.62700704356286	0.00886814101783364	0.0316103546988327	0.21737094664326
Attention Score	Nat Methods	PC5	0.00528716387598206	0.0500172730144984	0.105706760031669	0.915855780367169	-0.0927448898373419	0.103319217589306
Attention Score	Nat Methods	PC6	-0.0974389429941931	0.0521403941049189	-1.86878033177354	0.0622153661557782	-0.199632237579559	0.00475435159117235
Attention Score	Nat Methods	PC7	-0.11481238783208	0.0535156819143899	-2.14539708221878	0.0323835396872005	-0.219701196992386	-0.00992357867177458
Attention Score	Nat Methods	PC8	0.0177833519968757	0.0573814783863841	0.309914496749799	0.756750137549845	-0.0946822790201007	0.130248983013852
Attention Score	Nat Methods	PC9	-0.0307316736836587	0.0592047419649549	-0.519074531257137	0.603929608508846	-0.146770835648957	0.08530748828164
Attention Score	Nat Methods	PC10	-0.170841045843549	0.0598043230093661	-2.85666716462609	0.00445247938442069	-0.288055365061707	-0.0536267266253912
Attention Score	Nat Methods	PC11	0.0436919311718294	0.0606857613245301	0.719970059173806	0.471866907385258	-0.0752499753986433	0.162633837742302
Attention Score	Nat Methods	PC12	0.0299581636213289	0.0614062991545603	0.487867922897029	0.625849029460942	-0.0903959711455016	0.150312298388159
Attention Score	Nat Methods	PC13	-0.0924465534822866	0.0624142140333873	-1.48117788414085	0.139164842910767	-0.2147761651111	0.0298830581465268
Attention Score	Nat Methods	PC14	-0.0091091329070123	0.0637275597406911	-0.14293867432046	0.886393983582719	-0.134012854821392	0.115794589007367
Attention Score	Nat Methods	PC15	-0.00442308142943726	0.0655034040557599	-0.0675244514876219	0.946190151815935	-0.132807394243502	0.123961231384627
Attention Score	Neuroimage	(Intercept)	0.58944857552904	0.314508645455317	1.87418878319128	0.0609948035177681	-0.0269770423898594	1.20587419344794
Attention Score	Neuroimage	preprintTRUE	0.348162691988681	0.21431443695745	1.62454147714652	0.104358076297637	-0.0718858858149004	0.768211269792263
Attention Score	Neuroimage	preprint_age	0.673903811997361	0.343449823897293	1.96216088961772	0.0498296811991001	0.000754526662043231	1.34705309733268
Attention Score	Neuroimage	ns(pub_date, df = 3)1	0.697413404825616	0.120638815270519	5.78100342963205	8.13417711190218e-09	0.460965671757819	0.933861137893413
Attention Score	Neuroimage	ns(pub_date, df = 3)2	0.961182895993517	0.2443384139481	3.9338181846334	8.5369444341938e-05	0.482288404615603	1.44007738737143
Attention Score	Neuroimage	ns(pub_date, df = 3)3	0.312866077559969	0.100172952304767	3.12325902712843	0.00180447671636932	0.116530698817577	0.50920145630236
Attention Score	Neuroimage	log2(authors)	0.049664472899943	0.037185810690354	1.33557590860392	0.18178223648513	-0.0232183767890753	0.122547322588961
Attention Score	Neuroimage	log2(references + 1)	0.155045801802941	0.0495850839273344	3.12686375665223	0.00178256538771751	0.0578608231349695	0.252230780470912
Attention Score	Neuroimage	any_affil_usaTRUE	0.0467435592956579	0.0581929762718692	0.803250878203561	0.421888975935154	-0.0673125783503996	0.160799696941715
Attention Score	Neuroimage	any_affil_nature_indexTRUE	0.201612298261803	0.0607036510800584	3.32125489446935	0.000906122131524313	0.0826353284148029	0.320589268108804
Attention Score	Neuroimage	last_author_pub_age	-0.00253029581190756	0.00400148347159623	-0.632339438577814	0.527209952061628	-0.0103730593009685	0.00531246767715335
Attention Score	Neuroimage	PC1	-0.00432407002491759	0.0161699229321419	-0.267414386763859	0.789167233814296	-0.0360165366047041	0.0273683965548689
Attention Score	Neuroimage	PC2	-0.130483275336466	0.0167316689760012	-7.79858097381815	8.38900534725917e-15	-0.163276743930675	-0.0976898067422576
Attention Score	Neuroimage	PC3	-0.0196656481018876	0.0194458999884718	-1.01130048563173	0.311948547553206	-0.0577789117262602	0.018447615522485
Attention Score	Neuroimage	PC4	0.132804424685276	0.020014796669767	6.63531220808659	3.78379306072479e-11	0.0935761440546401	0.172032705315911
Attention Score	Neuroimage	PC5	0.0876477237061609	0.0208454822171784	4.20463881780254	2.68612385339294e-05	0.0467913293201211	0.128504118092201
Attention Score	Neuroimage	PC6	-0.0643603537018987	0.0220004928501156	-2.92540508707561	0.00346410263551403	-0.107480527330256	-0.0212401800735412
Attention Score	Neuroimage	PC7	0.0747179284146063	0.0236265422103756	3.16245719535692	0.00157897547161001	0.0284107566030547	0.121025100226158
Attention Score	Neuroimage	PC8	-0.00241439810383591	0.0237141321719812	-0.101812627437768	0.918911735822176	-0.0488932430855417	0.0440644468778699
Attention Score	Neuroimage	PC9	0.0254051031916141	0.0245562321957784	1.03456845451973	0.300948110855958	-0.0227242275081145	0.0735344338913427
Attention Score	Neuroimage	PC10	0.0531740024081926	0.0251469146852017	2.1145338533114	0.0345462749148379	0.00388695530289591	0.102461049513489
Attention Score	Neuroimage	PC11	0.0130160091816361	0.0254900176328482	0.510631627216405	0.60964399676564	-0.0369435073440372	0.0629755257073095
Attention Score	Neuroimage	PC12	0.0794091266867104	0.0260250888730653	3.05125285350687	0.00229744883201356	0.0284008898010483	0.130417363572372
Attention Score	Neuroimage	PC13	0.110248387050194	0.0263234523419946	4.18821914458051	2.88685296393552e-05	0.0586553685111284	0.16184140558926
Attention Score	Neuroimage	PC14	-0.0141841423110636	0.0273228799379319	-0.519130572739225	0.603705333785834	-0.0677360029433221	0.0393677183211948
Attention Score	Neuroimage	PC15	-0.11228387974026	0.0276120908393344	-4.06647509576881	4.88716154588689e-05	-0.166402583323203	-0.0581651761573158
Attention Score	Neuron	(Intercept)	2.0937050281143	0.709343164173278	2.95161091818579	0.00322018097054662	0.703417973654997	3.48399208257361
Attention Score	Neuron	preprintTRUE	1.13131284772533	0.491029518985318	2.30396097176218	0.0213882120264393	0.168912675168077	2.09371302028258
Attention Score	Neuron	preprint_age	-0.825986060630386	0.6188578798165	-1.33469426110451	0.182219484706757	-2.03892521661954	0.386953095358771
Attention Score	Neuron	ns(pub_date, df = 3)1	0.387185789079273	0.226326955971296	1.71073652017119	0.0873778792854434	-0.0564068933550493	0.830778471513595
Attention Score	Neuron	ns(pub_date, df = 3)2	1.24009167031617	0.44095399639765	2.81229262110567	0.00499589857122804	0.37583771853777	2.10434562209457
Attention Score	Neuron	ns(pub_date, df = 3)3	0.842180222870391	0.192715367909865	4.3700729838229	1.34502602450843e-05	0.46446504249967	1.21989540324111
Attention Score	Neuron	log2(authors)	0.244497378638417	0.0603677992672952	4.05012906890704	5.43403529696864e-05	0.126178666248575	0.362816091028259
Attention Score	Neuron	log2(references + 1)	0.261850693799355	0.115657200663377	2.26402413595914	0.0237434001614338	0.0351667459464144	0.488534641652295
Attention Score	Neuron	any_affil_usaTRUE	0.121785839631759	0.12411540003591	0.981230690120032	0.326668865538499	-0.121475874365405	0.365047553628924
Attention Score	Neuron	any_affil_nature_indexTRUE	0.00241190795325522	0.150631055058698	0.0160120232332924	0.987227354992851	-0.292819534915063	0.297643350821573
Attention Score	Neuron	last_author_pub_age	-0.0227976709057391	0.00625632547894802	-3.64393939900526	0.000279503290765847	-0.0350598435200375	-0.0105354982914407
Attention Score	Neuron	PC1	-0.271465704305632	0.0255221768473756	-10.6364635716231	2.35619713144778e-25	-0.32148825173355	-0.221443156877714
Attention Score	Neuron	PC2	0.0125222507935929	0.0356260693703411	0.351491225804936	0.725279091808533	-0.0573035620830013	0.0823480636701871
Attention Score	Neuron	PC3	-0.17666974302762	0.0382925345222075	-4.6136863289935	4.36277527771309e-06	-0.251721731567903	-0.101617754487337
Attention Score	Neuron	PC4	-0.0134792952893746	0.0396583815805855	-0.33988515799579	0.734000115675732	-0.0912082948724689	0.0642497042937196
Attention Score	Neuron	PC5	0.191271580226778	0.0415734533090191	4.6008104932982	4.63655562400536e-06	0.109789109028143	0.272754051425413
Attention Score	Neuron	PC6	0.122831784839395	0.0426267294029948	2.88156718940687	0.00402464031106798	0.0392849304307904	0.206378639247999
Attention Score	Neuron	PC7	-0.0655714523635139	0.044627088680837	-1.46931951650412	0.141997767669712	-0.15303893891283	0.0218960341858018
Attention Score	Neuron	PC8	-0.0683237662854125	0.045388474168338	-1.50531093052415	0.132496790363052	-0.157283540968582	0.0206360083977566
Attention Score	Neuron	PC9	0.194965428901021	0.0463889964304359	4.20283782584922	2.82334624534206e-05	0.104044666618409	0.285886191183632
Attention Score	Neuron	PC10	0.0301619487098046	0.0481587895971479	0.626302051237412	0.531231190750051	-0.0642275444396474	0.124551441859257
Attention Score	Neuron	PC11	-0.066981346312036	0.0488699322670206	-1.37060444336318	0.170744360484427	-0.162764653482308	0.0288019608582363
Attention Score	Neuron	PC12	-0.0485650721694538	0.0489194042537396	-0.992756819309411	0.321020608971301	-0.144445342651939	0.0473151983130313
Attention Score	Neuron	PC13	0.0300621796555045	0.0491895434161341	0.611149800704273	0.541211530496983	-0.0663475538560876	0.126471913167097
Attention Score	Neuron	PC14	0.0098680489231691	0.0500472061836381	0.197174821047159	0.843722788952623	-0.0882226727236118	0.10795877056995
Attention Score	Neuron	PC15	-0.0190667639594923	0.0506563854875787	-0.376394086865269	0.706687817958567	-0.118351455102124	0.0802179271831394
Attention Score	Nucleic Acids Res	(Intercept)	1.07121773869694	0.225604293711271	4.74821520936072	2.11161385494282e-06	0.629041448265252	1.51339402912863
Attention Score	Nucleic Acids Res	preprintTRUE	1.13327550002339	0.152705718213293	7.42130362427214	1.36310695292797e-13	0.833977792092016	1.43257320795477
Attention Score	Nucleic Acids Res	preprint_age	-0.268955047205078	0.216692654890079	-1.2411821127094	0.214598807397526	-0.693664846504	0.155754752093844
Attention Score	Nucleic Acids Res	ns(pub_date, df = 3)1	-0.304406467472186	0.0884919132248734	-3.43993542888643	0.000586782299527436	-0.477847430315982	-0.130965504628391
Attention Score	Nucleic Acids Res	ns(pub_date, df = 3)2	0.882273056919354	0.185510499166191	4.75591980445789	2.03300651168886e-06	0.518679159799573	1.24586695403914
Attention Score	Nucleic Acids Res	ns(pub_date, df = 3)3	0.265332111020298	0.0861227210202221	3.08086075169404	0.00207565634554159	0.0965346795700721	0.434129542470524
Attention Score	Nucleic Acids Res	log2(authors)	0.178703102025237	0.0254209711091083	7.02975119472161	2.35790728783848e-12	0.128878914199352	0.228527289851123
Attention Score	Nucleic Acids Res	log2(references + 1)	0.0115514065175781	0.0368606546688449	0.313380394932092	0.754005220091634	-0.060694149079926	0.0837969621150822
Attention Score	Nucleic Acids Res	any_affil_usaTRUE	0.0415877345700053	0.0419043352771441	0.992444678932504	0.321030409325773	-0.0405432533692884	0.123718722509299
Attention Score	Nucleic Acids Res	any_affil_nature_indexTRUE	0.103833052934959	0.0424433769052973	2.44639000253536	0.0144649289427668	0.0206455628183176	0.187020543051601
Attention Score	Nucleic Acids Res	last_author_pub_age	-0.0128859017638576	0.00251836107476822	-5.11678086711356	3.22846931934705e-07	-0.0178217987704708	-0.00795000475724426
Attention Score	Nucleic Acids Res	PC1	-0.121707775177258	0.0126810804136419	-9.59758720923563	1.27507102736135e-21	-0.146562236073052	-0.0968533142814632
Attention Score	Nucleic Acids Res	PC2	0.17380503349152	0.0139077030459949	12.4970336882173	2.71215157967089e-35	0.146546436413692	0.201063630569348
Attention Score	Nucleic Acids Res	PC3	-0.0597972467387808	0.0154632214545032	-3.86706268902115	0.000111603761252895	-0.0901046038745742	-0.0294898896029874
Attention Score	Nucleic Acids Res	PC4	0.0168309349075053	0.0157567245232932	1.06817472645562	0.285495130286638	-0.0140516776724684	0.047713547487479
Attention Score	Nucleic Acids Res	PC5	0.0931647440275809	0.0168587421458142	5.52619781605191	3.44444220999524e-08	0.0601222165971375	0.126207271458024
Attention Score	Nucleic Acids Res	PC6	0.0498515859139093	0.0170386171015469	2.92579999989456	0.00345173804007524	0.0164565100485092	0.0832466617793095
Attention Score	Nucleic Acids Res	PC7	-0.0561159620847283	0.0179063380342055	-3.13386031122238	0.00173557521597486	-0.0912117397267707	-0.0210201844426858
Attention Score	Nucleic Acids Res	PC8	-0.060285973114641	0.0182438928702043	-3.30444678356445	0.000958582355533828	-0.0960433460780486	-0.0245286001512335
Attention Score	Nucleic Acids Res	PC9	-0.0169568880672887	0.0189184470606854	-0.896315010047888	0.370129250921333	-0.0540363629496598	0.0201225868150824
Attention Score	Nucleic Acids Res	PC10	0.0556210252827386	0.0190817747326899	2.91487694734451	0.00357465598900893	0.0182214340455601	0.0930206165199172
Attention Score	Nucleic Acids Res	PC11	0.039751383415475	0.0193454249120633	2.05482089931698	0.0399500253859393	0.00183504732220692	0.077667719508743
Attention Score	Nucleic Acids Res	PC12	0.0281228010991936	0.0196536184716055	1.43092230775844	0.15251722992142	-0.0103975832710444	0.0666431854694316
Attention Score	Nucleic Acids Res	PC13	0.048803057914654	0.0199257987509062	2.44923972809043	0.0143511251826472	0.00974920999968475	0.0878569058296233
Attention Score	Nucleic Acids Res	PC14	-0.0289228962274181	0.0201886124330197	-1.43263418045081	0.15202717817682	-0.0684918494939742	0.0106460570391379
Attention Score	Nucleic Acids Res	PC15	-0.0239112265644161	0.0206361586856237	-1.15870530599641	0.246633659407396	-0.0643573543674921	0.0165349012386598
Attention Score	PLoS Biol	(Intercept)	5.50002100394978	0.514419725333468	10.6916992741374	2.76917294430656e-25	4.49177686935919	6.50826513854036
Attention Score	PLoS Biol	preprintTRUE	0.470181360393246	0.412687147547747	1.13931670319063	0.254855580461476	-0.338670585682905	1.2790333064694
Attention Score	PLoS Biol	preprint_age	0.052903446578685	0.647144569246443	0.0817490389207586	0.934863339432369	-1.21547660193503	1.3212834950924
Attention Score	PLoS Biol	ns(pub_date, df = 3)1	0.732087580846261	0.276043321879134	2.65207495643313	0.0081319436729916	0.191052611790362	1.27312254990216
Attention Score	PLoS Biol	ns(pub_date, df = 3)2	0.379511457320569	0.572680377344924	0.662693314340662	0.507686227473013	-0.742921456928291	1.50194437156943
Attention Score	PLoS Biol	ns(pub_date, df = 3)3	-0.788467433488703	0.214164782361771	-3.68159239251956	0.00024471591221406	-1.20822269367463	-0.368712173302773
Attention Score	PLoS Biol	log2(authors)	0.0346299167778889	0.0603451698663391	0.573863937322442	0.566194437586004	-0.0836444428010874	0.152904276356865
Attention Score	PLoS Biol	log2(references + 1)	-0.108788040444671	0.0836575693731207	-1.30039685900347	0.193777402667066	-0.272753863450149	0.0551777825608063
Attention Score	PLoS Biol	any_affil_usaTRUE	0.180856420817185	0.128637846985125	1.40593476224846	0.160067405832679	-0.0712691263224344	0.432981967956804
Attention Score	PLoS Biol	any_affil_nature_indexTRUE	0.128223105015485	0.145842818360799	0.87918696619175	0.379520148570277	-0.157623566375498	0.414069776406468
Attention Score	PLoS Biol	last_author_pub_age	-0.016592100002062	0.0082535385059686	-2.01030139861386	0.0446788956105474	-0.032768738218775	-0.000415461785349042
Attention Score	PLoS Biol	PC1	0.235189450180864	0.0444637674167045	5.28946294578956	1.52003543707005e-07	0.148042067427157	0.32233683293457
Attention Score	PLoS Biol	PC2	0.0361484324879023	0.0489614241586379	0.738304351008649	0.460510155900375	-0.0598141954948173	0.132111060470622
Attention Score	PLoS Biol	PC3	-0.0688384155240602	0.0573095245082769	-1.2011688478434	0.229982283606249	-0.181163019531398	0.043486188483278
Attention Score	PLoS Biol	PC4	0.170998735143201	0.0590018893406662	2.89819083853205	0.00383869674985399	0.0553571570156773	0.286640313270724
Attention Score	PLoS Biol	PC5	0.232455538852837	0.0598995592064204	3.88075541677643	0.000111252524513311	0.115054560118428	0.349856517587245
Attention Score	PLoS Biol	PC6	0.0391561817625789	0.0632254391476017	0.619310554271796	0.535858888142282	-0.0847634018734492	0.163075765398607
Attention Score	PLoS Biol	PC7	-0.0849627330251748	0.0649185336301645	-1.30875927526645	0.190929442231657	-0.212200720869449	0.0422752548190998
Attention Score	PLoS Biol	PC8	-0.0512661267882581	0.0665416305772891	-0.770436888057797	0.441230530387658	-0.181685326192314	0.0791530726157976
Attention Score	PLoS Biol	PC9	0.0554631019489865	0.0697163146161716	0.795554128963109	0.426488100267955	-0.0811783638335733	0.192104567731546
Attention Score	PLoS Biol	PC10	-0.121412217147712	0.0697914626173254	-1.73964282441577	0.0822425829990921	-0.258200970306043	0.0153765360106194
Attention Score	PLoS Biol	PC11	-0.161720637666353	0.0780719679358317	-2.07143027058409	0.0385855433997807	-0.314738883022749	-0.00870239230995656
Attention Score	PLoS Biol	PC12	-0.0657137010554413	0.0813205019739372	-0.808082826105798	0.419243302958243	-0.225098956129076	0.0936715540181939
Attention Score	PLoS Biol	PC13	0.0683545714486326	0.0853788062414646	0.800603504051289	0.42355951077276	-0.0989848138276615	0.235693956724927
Attention Score	PLoS Comput Biol	(Intercept)	1.74053085936866	0.422977097240704	4.11495296251979	4.01716183463718e-05	0.91151098249158	2.56955073624573
Attention Score	PLoS Comput Biol	preprintTRUE	0.214566020264056	0.191070165812755	1.12296977056233	0.261574501841779	-0.159924623249041	0.589056663777152
Attention Score	PLoS Comput Biol	preprint_age	0.463486774899767	0.241373466679654	1.92020598318248	0.0549627673860088	-0.00959652661593241	0.936570076415467
Attention Score	PLoS Comput Biol	ns(pub_date, df = 3)1	0.945754385342325	0.155769844843267	6.07148569926307	1.49176781317379e-09	0.640451099572129	1.25105767111252
Attention Score	PLoS Comput Biol	ns(pub_date, df = 3)2	0.261507626416415	0.327755507995297	0.79787408613181	0.425030823656447	-0.380881364988998	0.903896617821828
Attention Score	PLoS Comput Biol	ns(pub_date, df = 3)3	-0.806313201625321	0.136734473908367	-5.89692693128489	4.28389688115843e-09	-1.07430784593075	-0.53831855731989
Attention Score	PLoS Comput Biol	log2(authors)	0.190489335309738	0.0491732924912784	3.87383731409737	0.000110307626836769	0.0941114530255789	0.286867217593898
Attention Score	PLoS Comput Biol	log2(references + 1)	0.0797804148099408	0.0653878899198312	1.22010994555346	0.222555716028221	-0.0483774944579979	0.20793832407788
Attention Score	PLoS Comput Biol	any_affil_usaTRUE	0.1018282052458	0.075246716000695	1.35325779858432	0.176114174100031	-0.0456526480704762	0.249309058562076
Attention Score	PLoS Comput Biol	any_affil_nature_indexTRUE	0.2319986051666	0.0789089518167696	2.9400796718896	0.00331595109161153	0.0773399015479253	0.386657308785275
Attention Score	PLoS Comput Biol	last_author_pub_age	-0.020523632987597	0.00537987360977587	-3.81489129229786	0.000140048394004396	-0.0310679915041352	-0.00997927447105882
Attention Score	PLoS Comput Biol	PC1	0.082879875557997	0.0211291633415548	3.92253466066007	9.0344023402307e-05	0.0414674763850855	0.124292274730908
Attention Score	PLoS Comput Biol	PC2	0.128674737865595	0.0248018923277156	5.18810162407663	2.32181192191141e-07	0.0800639221548322	0.177285553576358
Attention Score	PLoS Comput Biol	PC3	-0.280291014740934	0.0280048485734963	-10.0086602505753	4.38178367230821e-23	-0.335179509337484	-0.225402520144383
Attention Score	PLoS Comput Biol	PC4	0.107767554209057	0.0305878071218529	3.52321935926112	0.000435150317732999	0.0478165538841677	0.167718554533946
Attention Score	PLoS Comput Biol	PC5	0.0775696474361936	0.0323721800262991	2.39618238169861	0.0166510023611779	0.0141213404836005	0.141017954388787
Attention Score	PLoS Comput Biol	PC6	0.0696722975624775	0.0342524678735967	2.034081100947	0.0420647600256936	0.0025386941486127	0.136805900976342
Attention Score	PLoS Comput Biol	PC7	-0.0586158283492973	0.0349074195707213	-1.67917964347217	0.0932609345631997	-0.12703311350114	0.009801456802545
Attention Score	PLoS Comput Biol	PC8	0.0413865373271897	0.0362257183595025	1.14246284687778	0.253387659301652	-0.0296145659715266	0.112387640625906
Attention Score	PLoS Comput Biol	PC9	-0.0414341568555168	0.0383656133981062	-1.0799816081544	0.280270332101096	-0.116629377360592	0.0337610636495587
Attention Score	PLoS Comput Biol	PC10	-0.030418447353213	0.0384255837524998	-0.791619654997021	0.428668962623883	-0.10573120759304	0.0448943128866141
Attention Score	PLoS Comput Biol	PC11	-0.0511093259484196	0.0398097060968004	-1.28384082575599	0.199334656830073	-0.129134916133273	0.0269162642364339
Attention Score	PLoS Comput Biol	PC12	-0.0377534787269621	0.0401393037156903	-0.940561375811919	0.347034321466806	-0.11642506837423	0.0409181109203056
Attention Score	PLoS Comput Biol	PC13	-0.010901027171233	0.0414048771086743	-0.263278819609134	0.792360667602027	-0.0920530950885415	0.0702510407460755
Attention Score	PLoS Comput Biol	PC14	0.136969966473177	0.042903416300409	3.19251887807991	0.00143055375468139	0.052880815710647	0.221059117235708
Attention Score	PLoS Comput Biol	PC15	0.0034908140050923	0.0437627156631053	0.0797668506672514	0.936430041365572	-0.0822825325602609	0.0892641605704455
Attention Score	PLoS Genet	(Intercept)	-0.503511431734542	0.450751052940403	-1.11704992911268	0.264084558754963	-1.38696726149124	0.379944398022154
Attention Score	PLoS Genet	preprintTRUE	0.210614796734373	0.196059427352315	1.07423957918587	0.28282308224828	-0.17365461970571	0.594884213174457
Attention Score	PLoS Genet	preprint_age	0.832898572852509	0.293858889893289	2.83434873505091	0.00463024555689066	0.256945732124741	1.40885141358028
Attention Score	PLoS Genet	ns(pub_date, df = 3)1	0.698727097938965	0.148875220975382	4.6933740441232	2.83820909198045e-06	0.406937026636774	0.990517169241157
Attention Score	PLoS Genet	ns(pub_date, df = 3)2	1.72507117657263	0.273774556539969	6.3010646364458	3.50449480001469e-10	1.18848290587087	2.26165944727439
Attention Score	PLoS Genet	ns(pub_date, df = 3)3	-0.204722965937553	0.123768460286972	-1.65408025164794	0.0982417048881456	-0.447304690521995	0.037858758646889
Attention Score	PLoS Genet	log2(authors)	0.108990996215718	0.0391248676949326	2.78572178353551	0.0053827394899215	0.0323076646337558	0.185674327797681
Attention Score	PLoS Genet	log2(references + 1)	0.347003032749158	0.0712699933359775	4.86885176364945	1.19531214564924e-06	0.207316412632233	0.486689652866084
Attention Score	PLoS Genet	any_affil_usaTRUE	0.0667291827936403	0.0719850906005841	0.92698616111902	0.354026733993329	-0.0743590022073572	0.207817367794638
Attention Score	PLoS Genet	any_affil_nature_indexTRUE	0.204602304886852	0.0788936952896547	2.59339233807802	0.00956105910933092	0.0499735035118517	0.359231106261853
Attention Score	PLoS Genet	last_author_pub_age	-0.00587162441320562	0.00434080233654288	-1.35265878470797	0.176291818466379	-0.014379440656837	0.00263619183042573
Attention Score	PLoS Genet	PC1	-0.0495929877979611	0.0195110098620552	-2.54179502489048	0.0110907477330737	-0.0878338644295951	-0.011352111166327
Attention Score	PLoS Genet	PC2	0.196587546415424	0.0205856306072449	9.54974613924323	3.0780338955005e-21	0.156240451826179	0.236934641004669
Attention Score	PLoS Genet	PC3	-0.15454001930923	0.0225947463554303	-6.83964391005825	1.00333542771956e-11	-0.198824908405691	-0.110255130212769
Attention Score	PLoS Genet	PC4	0.0197069501758929	0.0234919224072339	0.838881971184468	0.401618916533425	-0.026336371669895	0.0657502720216808
Attention Score	PLoS Genet	PC5	-0.0803723794074803	0.0262042226370863	-3.06715373779991	0.00218514066581022	-0.131731712019039	-0.029013046795922
Attention Score	PLoS Genet	PC6	0.14725626607003	0.0275448028329604	5.34606353739521	9.83596162138485e-08	0.0932694445561708	0.201243087583889
Attention Score	PLoS Genet	PC7	-0.153352287411157	0.0299321900305519	-5.12332332698107	3.24047304631464e-07	-0.212018301849447	-0.0946862729728663
Attention Score	PLoS Genet	PC8	-0.0144062805009258	0.0302648970476571	-0.476006261585516	0.634113152965978	-0.0737243887101462	0.0449118277082947
Attention Score	PLoS Genet	PC9	0.140913552779275	0.032030766017707	4.39931885179942	1.13324399508601e-05	0.0781344049873395	0.20369270057121
Attention Score	PLoS Genet	PC10	0.10776959196253	0.032572080400227	3.30864932906709	0.000951289777831812	0.0439294874765425	0.171609696448518
Attention Score	PLoS Genet	PC11	-0.131900363966644	0.0339304708255418	-3.88737205106372	0.000104077901422051	-0.198402864763193	-0.0653978631700951
Attention Score	PLoS Genet	PC12	-0.0123671072261669	0.0344236563349649	-0.359261872295807	0.719430733171637	-0.0798362338588821	0.0551020194065483
Attention Score	PLoS Genet	PC13	-0.00494083525214258	0.0349420246987833	-0.141400943269169	0.887565051828402	-0.0734259452086669	0.0635442747043818
Attention Score	PLoS Genet	PC14	0.0201164212007572	0.0356313148571041	0.564571396857852	0.572417975180652	-0.0497196726409737	0.0899525150424881
Attention Score	PLoS Genet	PC15	0.0352367736518513	0.0361031170006909	0.976003641214052	0.329160819062398	-0.0355240353991386	0.105997582702841
Attention Score	PLoS Negl Trop Dis	(Intercept)	1.00224731958407	0.326960884605044	3.06534318560688	0.00219468763453857	0.361415761404827	1.64307887776331
Attention Score	PLoS Negl Trop Dis	preprintTRUE	1.3729918904781	0.466906186045078	2.94061619124819	0.00330210775114602	0.457872581670788	2.28811119928541
Attention Score	PLoS Negl Trop Dis	preprint_age	-1.17629325882936	0.962355420028659	-1.22230647258612	0.221693364016414	-3.06247522241245	0.709888704753722
Attention Score	PLoS Negl Trop Dis	ns(pub_date, df = 3)1	1.15640488281921	0.129658792754221	8.91883117415167	8.26227827598507e-19	0.902278318741997	1.41053144689643
Attention Score	PLoS Negl Trop Dis	ns(pub_date, df = 3)2	1.07559989011178	0.260810432194055	4.12406774170554	3.82938949301318e-05	0.564420836219108	1.58677894400445
Attention Score	PLoS Negl Trop Dis	ns(pub_date, df = 3)3	-0.329021515957419	0.108648715910524	-3.02830561042599	0.00248145126509623	-0.54196908610857	-0.116073945806268
Attention Score	PLoS Negl Trop Dis	log2(authors)	0.110352556007758	0.0429313137308024	2.57044442431265	0.0102074256810955	0.0262087272863957	0.194496384729121
Attention Score	PLoS Negl Trop Dis	log2(references + 1)	0.0187868347883796	0.052943244750905	0.354848571838969	0.722729432534287	-0.0849800181480834	0.122553687724843
Attention Score	PLoS Negl Trop Dis	any_affil_usaTRUE	0.317786682289778	0.0652271414844195	4.87200075087893	1.16546406596009e-06	0.189943834165817	0.445629530413739
Attention Score	PLoS Negl Trop Dis	any_affil_nature_indexTRUE	0.399484233395898	0.0652806839032314	6.11948603338887	1.0681174243779e-09	0.271536444059421	0.527432022732376
Attention Score	PLoS Negl Trop Dis	last_author_pub_age	-0.00641629320644601	0.00392819794077046	-1.63339355683985	0.102497292653264	-0.0141154196945005	0.00128283328160848
Attention Score	PLoS Negl Trop Dis	PC1	0.00146155098376193	0.0133491007514589	0.1094868494121	0.912824100641478	-0.0247022057150942	0.027625307682618
Attention Score	PLoS Negl Trop Dis	PC2	-0.137543126204782	0.0215505067248545	-6.38236158253075	2.03002636403834e-10	-0.179781343234085	-0.0953049091754788
Attention Score	PLoS Negl Trop Dis	PC3	0.060092234386206	0.0231735963872167	2.59313372780389	0.00955947749948683	0.0146728200749937	0.105511648697418
Attention Score	PLoS Negl Trop Dis	PC4	0.101820724980151	0.0246277061485717	4.13439742889152	3.66215549854088e-05	0.0535513079071144	0.150090142053187
Attention Score	PLoS Negl Trop Dis	PC5	0.147540568691246	0.026364817648191	5.59611565154781	2.40157158127768e-08	0.0958664756418255	0.199214661740666
Attention Score	PLoS Negl Trop Dis	PC6	-0.00962507681157463	0.0274506427747149	-0.350632110532595	0.725890414049502	-0.0634273480024905	0.0441771943793412
Attention Score	PLoS Negl Trop Dis	PC7	-0.0382340159063787	0.029181875850133	-1.31019733284913	0.190235231306355	-0.0954294415739585	0.0189614097612011
Attention Score	PLoS Negl Trop Dis	PC8	0.0962738846491271	0.0301015151112018	3.19830693881918	0.00139760184324658	0.0372759991510834	0.155271770147171
Attention Score	PLoS Negl Trop Dis	PC9	0.00256146903199511	0.0309573899970587	0.0827417631860593	0.934062717779091	-0.0581139004176005	0.0632368384815907
Attention Score	PLoS Negl Trop Dis	PC10	0.0165440179715197	0.0332005579222711	0.498305420356259	0.618307442605177	-0.0485278798227677	0.081615915765807
Attention Score	PLoS Negl Trop Dis	PC11	0.0290635620645051	0.0333383515480152	0.871775619218802	0.383404618328441	-0.0362784062735399	0.0944055304025501
Attention Score	PLoS Negl Trop Dis	PC12	0.0329358396247643	0.0338540142549156	0.972878411900063	0.330696734456388	-0.0334168090469757	0.0992884882965044
Attention Score	PLoS Negl Trop Dis	PC13	-0.0434279744412533	0.0349192884140951	-1.24366722271819	0.213724890861313	-0.111868522098647	0.0250125732161399
Attention Score	PLoS Negl Trop Dis	PC14	0.0125842402182757	0.036375696557833	0.345951869217633	0.729404556692936	-0.0587108149476345	0.083879295384186
Attention Score	PLoS Negl Trop Dis	PC15	0.0247516616718686	0.0366548480695769	0.675262972714712	0.499563773813812	-0.0470905204032896	0.0965938437470269
Attention Score	PLoS Pathog	(Intercept)	1.89854212106952	0.545004400273138	3.48353539919684	0.000504810086796826	0.830353125118316	2.96673111702072
Attention Score	PLoS Pathog	preprintTRUE	0.829025884157354	0.410591386737148	2.01910198542007	0.0436014386702125	0.0242815537901867	1.63377021452452
Attention Score	PLoS Pathog	preprint_age	0.188758763108189	0.793497114629408	0.237882103952383	0.811995373094034	-1.3664670034019	1.74398452961828
Attention Score	PLoS Pathog	ns(pub_date, df = 3)1	1.1250836852904	0.16113768029599	6.98212660889596	3.86792384176814e-12	0.80925963535793	1.44090773522287
Attention Score	PLoS Pathog	ns(pub_date, df = 3)2	1.88754696469167	0.315724438905504	5.97846328030569	2.63338398263279e-09	1.26873843539777	2.50635549398558
Attention Score	PLoS Pathog	ns(pub_date, df = 3)3	-0.371852803873838	0.152231463994309	-2.44268033767145	0.0146592486438478	-0.67022099061649	-0.0734846171311863
Attention Score	PLoS Pathog	log2(authors)	0.144089776723881	0.0487124940076066	2.95796344776312	0.00313082624148798	0.0486150428718484	0.239564510575913
Attention Score	PLoS Pathog	log2(references + 1)	-0.0303210656034559	0.086712855157669	-0.349672093582012	0.726619302883874	-0.200275138709125	0.139633007502214
Attention Score	PLoS Pathog	any_affil_usaTRUE	0.0649864683822895	0.0779255788966801	0.833955541972344	0.404399374220807	-0.0877448597296379	0.217717796494217
Attention Score	PLoS Pathog	any_affil_nature_indexTRUE	0.110123454820919	0.0840214897862398	1.31065820305121	0.190114299308322	-0.0545556390875114	0.274802548729349
Attention Score	PLoS Pathog	last_author_pub_age	-0.00796548157895773	0.00466352689168783	-1.70803809304825	0.0877747100282897	-0.0171058263275999	0.00117486316968443
Attention Score	PLoS Pathog	PC1	0.00550481527552459	0.0203774412801975	0.270142615053151	0.787076659689363	-0.0344342357307423	0.0454438662817915
Attention Score	PLoS Pathog	PC2	-0.152254781210221	0.025847443851328	-5.89051598626059	4.46181534967458e-09	-0.202914840251245	-0.101594722169196
Attention Score	PLoS Pathog	PC3	-0.00923179614249006	0.0274998232383818	-0.335703835710665	0.737127213451261	-0.063130459270936	0.0446668669859559
Attention Score	PLoS Pathog	PC4	-0.151902117192907	0.0289356349141639	-5.24965557671421	1.67493480418471e-07	-0.208614919494468	-0.0951893148913461
Attention Score	PLoS Pathog	PC5	-0.0626598535558705	0.0322827759903594	-1.94096857019305	0.0523936061928918	-0.125932931817949	0.000613224706208254
Attention Score	PLoS Pathog	PC6	-0.0499836302555139	0.0332108961950965	-1.5050370806583	0.132462531558922	-0.115075790692201	0.0151085301811735
Attention Score	PLoS Pathog	PC7	0.0427386866062913	0.0335905048768467	1.27234427594895	0.203389440968366	-0.0230974931748453	0.108574866387428
Attention Score	PLoS Pathog	PC8	0.0488073685262359	0.0356517457963121	1.36900360518347	0.171142220452604	-0.0210687692205131	0.118683506272985
Attention Score	PLoS Pathog	PC9	-0.00452944064097413	0.0356815201233494	-0.126940798074635	0.898999214886957	-0.0744639349963802	0.0654050537144319
Attention Score	PLoS Pathog	PC10	0.0152983751217007	0.0363599189015937	0.420748329035195	0.673981232999608	-0.0559657564062201	0.0865625066496216
Attention Score	PLoS Pathog	PC11	0.0195428610481268	0.0369825352401619	0.528434865841861	0.597252492694865	-0.0529415760795738	0.0920272981758274
Attention Score	PLoS Pathog	PC12	0.0198042025767968	0.0373536690886334	0.53018091823336	0.596041659150836	-0.0534076435273518	0.0930160486809453
Attention Score	PLoS Pathog	PC13	-0.0809968195560252	0.038361164818395	-2.1114275319707	0.0348515632930637	-0.156183321005084	-0.00581031810696595
Attention Score	PLoS Pathog	PC14	0.039275256173967	0.038577839271303	1.01807817430518	0.308756212209807	-0.0363359193991618	0.114886431747096
Attention Score	PLoS Pathog	PC15	0.161612238573133	0.0389798648038589	4.14604410216256	3.51498132891535e-05	0.0852131074353293	0.238011369710937
Attention Score	Syst Biol	(Intercept)	2.159720376507	0.620708730050726	3.47944256613002	0.000602758058385353	0.943153620717986	3.37628713229602
Attention Score	Syst Biol	preprintTRUE	0.649312377205732	0.470852241276686	1.37901515652801	0.169253313991504	-0.273541057736535	1.572165812148
Attention Score	Syst Biol	preprint_age	-0.672615977076599	0.63721005941313	-1.05556396535246	0.292294563614687	-1.92152474411296	0.576292789959764
Attention Score	Syst Biol	ns(pub_date, df = 3)1	-0.339943455535977	0.438959535697304	-0.774430050815421	0.439485943616864	-1.20028833617312	0.520401425101163
Attention Score	Syst Biol	ns(pub_date, df = 3)2	2.20041756926815	0.864890616639451	2.54415706094478	0.0116215685076536	0.505263110088186	3.89557202844811
Attention Score	Syst Biol	ns(pub_date, df = 3)3	0.833309192680417	0.482065528260321	1.72862223873934	0.0852424512652271	-0.111521880898087	1.77814026625892
Attention Score	Syst Biol	log2(authors)	0.184778113784338	0.106623371919439	1.7329982203522	0.08446002911724	-0.0241998550879813	0.393756082656658
Attention Score	Syst Biol	log2(references + 1)	-0.0513535651241999	0.0761021521022551	-0.674797804077845	0.500493966055359	-0.200511042390609	0.0978039121422092
Attention Score	Syst Biol	any_affil_usaTRUE	0.591346644910767	0.2024042123362	2.92161234237813	0.00383546948973605	0.194641678412617	0.988051611408917
Attention Score	Syst Biol	any_affil_nature_indexTRUE	0.0641187628307754	0.199967201075792	0.320646398438477	0.748774659015516	-0.327809749367056	0.456047275028607
Attention Score	Syst Biol	last_author_pub_age	-0.0139614641467162	0.017860904359598	-0.781677336467774	0.435222351681102	-0.0489681934228427	0.0210452651294103
Attention Score	Syst Biol	PC1	0.0157361250220088	0.0691826328170579	0.227457735868776	0.820273463449137	-0.119859343655083	0.151331593699101
Attention Score	Syst Biol	PC2	0.0893370143985223	0.0732463075533921	1.21967942661684	0.223857734167327	-0.0542231104066702	0.232897139203715
Attention Score	Syst Biol	PC3	-0.0452365789634588	0.074142031897779	-0.610134060337426	0.542386013675401	-0.190552291223725	0.100079133296808
Attention Score	Syst Biol	PC4	-0.00428636212244961	0.0804066518223352	-0.0533085512865362	0.957533158370921	-0.161880503811678	0.153307779566779
Attention Score	Syst Biol	PC5	0.0112180479182007	0.0854597810853225	0.131266986361697	0.89568088472744	-0.156280045135709	0.17871614097211
Attention Score	Syst Biol	PC6	-0.0472807346923417	0.0833923876241673	-0.566967034274477	0.571299257425608	-0.210726811020513	0.11616534163583
Attention Score	Syst Biol	PC7	0.0160519193287598	0.0896535053152666	0.179043967910827	0.858063586330663	-0.159665722176933	0.191769560834453
Attention Score	Syst Biol	PC8	-0.0438851589334794	0.0891281106668787	-0.492382914942544	0.622926653647755	-0.218573045850662	0.130802727983703
Attention Score	Syst Biol	PC9	0.0155808604295065	0.0967049207246165	0.16111755547451	0.872144747004922	-0.173957301318543	0.205119022177556
Attention Score	Syst Biol	PC10	-0.0890626928446386	0.0981146689973047	-0.907740848079355	0.36498205494252	-0.281363910434424	0.103238524745147
Attention Score	Syst Biol	PC11	-0.223229481609519	0.100249616253841	-2.22673651981153	0.0269513253618756	-0.419715118931007	-0.0267438442880298
Attention Score	Syst Biol	PC12	0.0339208460160921	0.103186056631847	0.328734783781077	0.74266056712863	-0.168320108689038	0.236161800721222
Attention Score	Syst Biol	PC13	0.0232070530332222	0.105596537875364	0.219770965034987	0.826247909299806	-0.183758358094611	0.230172464161055
Attention Score	Syst Biol	PC14	0.0897068818023035	0.109558504814175	0.818803450763203	0.413761113535688	-0.125023841833538	0.304437605438145
Attention Score	Syst Biol	PC15	0.009270861324195	0.115125397313627	0.0805283763663297	0.935888293553953	-0.216370771116378	0.234912493764768
Attention Score	eNeuro	(Intercept)	1.5579560832401	0.695814818055063	2.23903838034793	0.0254750892627153	0.194184099942887	2.92172806653731
Attention Score	eNeuro	preprintTRUE	0.520058492768757	0.52036929251803	0.999402732340778	0.31795409061031	-0.49984657922717	1.53996356476468
Attention Score	eNeuro	preprint_age	-0.542752672032943	0.707916299310056	-0.766690458408595	0.443530881910414	-1.93024312274953	0.844737778683643
Attention Score	eNeuro	ns(pub_date, df = 3)1	1.10231393015733	0.268881061696815	4.09963395413946	4.63680391991114e-05	0.575316733106678	1.62931112720798
Attention Score	eNeuro	ns(pub_date, df = 3)2	0.496744322621392	0.674456890113533	0.736510116366035	0.461673574275236	-0.825166891126021	1.81865553636881
[truncated: 21 more rows]
