# Supplementary material for: Releasing a preprint is associated with more attention and citations for the peer-reviewed article
Source: eLife journal article supplement (doi:10.7554/elife.52646), 2019-12-06
Supplement: supp [file elife-52646-supp-v1.zip › elife_poa_e52646_Supplementary_file_10.csv]

Metric	Variable	Coefficient	Standard error	95% CI (lower)	95% CI (upper)	p-value	Adjusted p-value
citations	(Intercept)	2.84643013407463	0.189502948874196	2.4628014703296	3.23005879781966	1.44085088467332e-17	2.88170176934663e-17
citations	preprintTRUE	0.475388229065944	0.0415275262836254	0.391320147215672	0.559456310916216	7.00110875305503e-14	1.40022175061101e-13
citations	preprint_age	-0.0740451607744374	0.0628735885886161	-0.201326086577434	0.0532357650285593	0.246246268129941	0.246246268129941
citations	ns(pub_date, df = 3)1	-1.03806090315796	0.0443910440068984	-1.12792587357549	-0.948195932740436	3.67542155513583e-24	7.35084311027166e-24
citations	ns(pub_date, df = 3)2	-2.95332537853639	0.0696174591642209	-3.09425855657482	-2.81239220049797	1.28359595531377e-33	2.56719191062754e-33
citations	ns(pub_date, df = 3)3	-2.67576807932869	0.0646442754839472	-2.80663357334871	-2.54490258530867	3.20397839924573e-33	6.40795679849145e-33
citations	log2(authors)	0.181259513924298	0.00908067257015629	0.162876653368878	0.199642374479718	9.66536354943065e-22	1.93307270988613e-21
citations	log2(references + 1)	0.217374094195031	0.0203142087227909	0.176250128612123	0.258498059777938	5.02923527709938e-13	1.00584705541988e-12
citations	any_affil_usaTRUE	0.0796072829890328	0.0109917659479564	0.0573556161529036	0.101858949825162	1.15827480426952e-08	2.31654960853905e-08
citations	any_affil_nature_indexTRUE	0.0997803360714258	0.0144075486727307	0.0706137786220721	0.12894689352078	3.10165850912584e-08	3.10165850912584e-08
citations	last_author_pub_age	-0.00263928215676364	0.000605868086186176	-0.00386579797453945	-0.00141276633898783	9.68248676538279e-05	9.68248676538279e-05
Attention Score	(Intercept)	1.74918316375558	0.19846330841276	1.34741520045413	2.15095112705703	1.01034415582541e-10	1.01034415582541e-10
Attention Score	preprintTRUE	0.488380156768825	0.0566691380083027	0.373659484510895	0.603100829026755	1.79588396539464e-10	1.79588396539464e-10
Attention Score	preprint_age	0.177757153193844	0.0705218268741523	0.0349931784413992	0.320521127946288	0.0160340027237577	0.0320680054475155
Attention Score	ns(pub_date, df = 3)1	0.412263361418787	0.111769773580742	0.185997284080171	0.638529438757404	0.000703044362199776	0.000703044362199776
Attention Score	ns(pub_date, df = 3)2	0.821888875385967	0.126123851535632	0.566564486407135	1.0772132643648	1.11706816383037e-07	1.11706816383037e-07
Attention Score	ns(pub_date, df = 3)3	0.200369718018539	0.0931377667438864	0.0118221665824211	0.388917269454657	0.0378710118124024	0.0378710118124024
Attention Score	log2(authors)	0.128439721055605	0.014562204072864	0.098960080116804	0.157919361994406	9.91464194676271e-11	9.91464194676271e-11
Attention Score	log2(references + 1)	0.0696309363543208	0.0211850704118743	0.0267440034504582	0.112517869258183	0.00218630249232772	0.00218630249232772
Attention Score	any_affil_usaTRUE	0.142921400615447	0.0214144086690424	0.0995701966822121	0.186272604548683	6.81144422473685e-08	6.81144422473685e-08
Attention Score	any_affil_nature_indexTRUE	0.147182721489667	0.0205028963497018	0.105676777776039	0.188688665203295	1.41152839207638e-08	2.82305678415276e-08
Attention Score	last_author_pub_age	-0.00876141776042275	0.0010691439773136	-0.010925786588478	-0.00659704893236746	6.3352004569447e-10	1.26704009138894e-09
