# Supplementary material for: Releasing a preprint is associated with more attention and citations for the peer-reviewed article
Source: eLife journal article supplement (doi:10.7554/elife.52646), 2019-12-06
Supplement: supp [file elife-52646-supp-v1.zip › elife_poa_e52646_Supplementary_file_11.csv]

Metric	Journal	Variable	Coefficient	Standard error	t-statistic	p-value	95% CI (lower)	95% CI (upper)
citations	Am J Hum Genet	(Intercept)	3.17802521853675	0.357665005269453	8.88547990917514	5.40491247952526e-18	2.47701468967829	3.87903574739521
citations	Am J Hum Genet	preprintTRUE	0.562918175999266	0.133108837661304	4.22900677287569	2.66132016379901e-05	0.302029648159122	0.823806703839411
citations	Am J Hum Genet	ns(pub_date, df = 3)1	-0.965870581600485	0.159584431315426	-6.05241108821823	2.33331843531882e-09	-1.27865031947203	-0.653090843728944
citations	Am J Hum Genet	ns(pub_date, df = 3)2	-3.0045111190362	0.289901731544709	-10.3638950448036	1.68057549534055e-23	-3.57270807191963	-2.43631416615277
citations	Am J Hum Genet	ns(pub_date, df = 3)3	-2.88429584460088	0.13126293466971	-21.9734219096845	1.15316686291353e-81	-3.14156646905855	-2.62702522014322
citations	Am J Hum Genet	log2(authors)	0.0639320721254772	0.0318853954247611	2.00505815511479	0.0453441441254799	0.00143784546012715	0.126426298790827
citations	Am J Hum Genet	log2(references + 1)	0.355380206547714	0.0615870118838639	5.7703758581089	1.19137176900236e-08	0.234671881339901	0.476088531755528
citations	Am J Hum Genet	any_affil_usaTRUE	0.0226495310579496	0.0856304781540586	0.264503148250564	0.79147065797169	-0.145183122102949	0.190482184218848
citations	Am J Hum Genet	any_affil_nature_indexTRUE	-0.00773778189845337	0.124253308022152	-0.0622742526667689	0.950362336647838	-0.251269790581833	0.235794226784927
citations	Am J Hum Genet	last_author_pub_age	-0.00675755646083779	0.0046458652008287	-1.45453132381723	0.146250516874327	-0.01586328493149	0.00234817200981441
citations	BMC Bioinformatics	(Intercept)	1.5534061546677	0.237831842059025	6.53153144347333	8.14060093393516e-11	1.0872643098552	2.01954799948021
citations	BMC Bioinformatics	preprintTRUE	0.55726943709714	0.1117845572929	4.98520950113862	6.69607349037534e-07	0.338175730775301	0.776363143418978
citations	BMC Bioinformatics	ns(pub_date, df = 3)1	-0.878894823323245	0.114532415011539	-7.67376487464005	2.53839318409404e-14	-1.10337423180826	-0.654415414838234
citations	BMC Bioinformatics	ns(pub_date, df = 3)2	-2.42181871458384	0.246517494320441	-9.82412514478909	2.6560034749823e-22	-2.90498412501096	-1.93865330415672
citations	BMC Bioinformatics	ns(pub_date, df = 3)3	-2.18999664347766	0.092144844094269	-23.7668929282378	8.64364520543131e-111	-2.37059721926348	-2.00939606769183
citations	BMC Bioinformatics	log2(authors)	0.124665092082113	0.0357112886855844	3.49091552477177	0.000491296663720784	0.0546722524168549	0.194657931747371
citations	BMC Bioinformatics	log2(references + 1)	0.242516103863393	0.040182161918399	6.03541701802628	1.86903218918228e-09	0.163760513682374	0.321271694044411
citations	BMC Bioinformatics	any_affil_usaTRUE	0.0458511529556762	0.0597193775186959	0.767776806469925	0.442706032668229	-0.0711966761601188	0.162898982071471
citations	BMC Bioinformatics	any_affil_nature_indexTRUE	0.231555300692758	0.0597126348390246	3.87782755386682	0.000108630717545924	0.114520686986278	0.348589914399237
citations	BMC Bioinformatics	last_author_pub_age	0.0052712651399178	0.00466388928196211	1.13022947613803	0.258508490190841	-0.0038697898806103	0.0144123201604459
citations	BMC Genomics	(Intercept)	1.36063074064441	0.16994666656982	8.00622199956723	1.52981047931712e-15	1.02754139487492	1.69372008641389
citations	BMC Genomics	preprintTRUE	0.507197989186584	0.0843771242458468	6.0110840908583	2.00433982936237e-09	0.341821864545663	0.672574113827505
citations	BMC Genomics	ns(pub_date, df = 3)1	-0.991855998536894	0.0717426862866042	-13.8251862297787	1.61554402100715e-42	-1.13246907981279	-0.851242917260994
citations	BMC Genomics	ns(pub_date, df = 3)2	-3.30585639074641	0.158580802649074	-20.8465106464494	8.65356448220767e-92	-3.61666905257805	-2.99504372891477
citations	BMC Genomics	ns(pub_date, df = 3)3	-2.84644366581636	0.0599535302845897	-47.4774988612806	0	-2.96395042592018	-2.72893690571253
citations	BMC Genomics	log2(authors)	0.225484641745887	0.0214085445225213	10.5324601356567	1.30227635581535e-25	0.183524665520323	0.267444617971451
citations	BMC Genomics	log2(references + 1)	0.371572564781264	0.0265918897821727	13.9731537632337	2.24490638610176e-43	0.319453418527346	0.423691711035181
citations	BMC Genomics	any_affil_usaTRUE	0.0787532221758061	0.035931964041615	2.19173163160792	0.0284552860704624	0.00832786676045244	0.14917857759116
citations	BMC Genomics	any_affil_nature_indexTRUE	-0.0098075187521348	0.0355092295513779	-0.276196326308472	0.782411284853822	-0.0794043297916009	0.0597892922873313
citations	BMC Genomics	last_author_pub_age	-0.00214070306442892	0.00236076249038779	-0.906784597410848	0.364574332095423	-0.00676771252164208	0.00248630639278423
citations	Bioinformatics	(Intercept)	2.75844326363936	0.176835282394807	15.5989417173026	1.60991617878132e-52	2.41185247894956	3.10503404832915
citations	Bioinformatics	preprintTRUE	0.770845923131462	0.0951822032035824	8.09863500934858	8.43598215363685e-16	0.584292232883268	0.957399613379657
citations	Bioinformatics	ns(pub_date, df = 3)1	-1.42070250174969	0.128776220228865	-11.0323357777141	1.07993063029056e-27	-1.67309925546347	-1.16830574803592
citations	Bioinformatics	ns(pub_date, df = 3)2	-3.02145606493807	0.266599342807694	-11.3333215045377	4.24072171020734e-29	-3.54398117514319	-2.49893095473294
citations	Bioinformatics	ns(pub_date, df = 3)3	-1.82941100821848	0.159188644944928	-11.4920948592243	7.45071225605151e-30	-2.14141501905827	-1.51740699737869
citations	Bioinformatics	log2(authors)	0.127481481304475	0.0388062873544788	3.28507285791053	0.00103302918183184	0.0514225557159843	0.203540406892966
citations	Bioinformatics	log2(references + 1)	0.204875048723249	0.0273217258296196	7.49861300859491	8.78402429533429e-14	0.151325450101717	0.258424647344781
citations	Bioinformatics	any_affil_usaTRUE	0.103486909195869	0.0619107741611593	1.67154926744226	0.0947330187890523	-0.0178559784149963	0.224829796806734
citations	Bioinformatics	any_affil_nature_indexTRUE	0.109285616289561	0.0616879432632432	1.7715879393677	0.0765795572005088	-0.0116205307867463	0.230191763365867
citations	Bioinformatics	last_author_pub_age	-0.00456739414621189	0.00468271813206533	-0.975372426312881	0.329465877086674	-0.0137453530348126	0.00461056474238884
citations	Biophys J	(Intercept)	1.71856923054509	0.262577629785307	6.54499483429056	7.65330244106719e-11	1.20392653302	2.23321192807019
citations	Biophys J	preprintTRUE	0.404638478906775	0.112052451949694	3.61115238324672	0.000312841746531091	0.18501970870597	0.624257249107579
citations	Biophys J	ns(pub_date, df = 3)1	-0.758225273911824	0.103449390502441	-7.32943200756641	3.41711458631984e-13	-0.960982353519228	-0.555468194304421
citations	Biophys J	ns(pub_date, df = 3)2	-2.46051752802028	0.196400341826665	-12.528071515231	1.22006298732133e-34	-2.8454551245519	-2.07557993148866
citations	Biophys J	ns(pub_date, df = 3)3	-2.39223364531167	0.0939027670269722	-25.4756459372974	3.25090362179432e-123	-2.57627968673319	-2.20818760389015
citations	Biophys J	log2(authors)	0.189425155540602	0.0321563758475424	5.8907495184996	4.54503031995514e-09	0.126399817006086	0.252450494075119
citations	Biophys J	log2(references + 1)	0.280642172537799	0.0433257931805657	6.47748493300949	1.18782125136034e-10	0.19572517830226	0.365559166773339
citations	Biophys J	any_affil_usaTRUE	0.140020516275975	0.048977578244403	2.85886973784737	0.00429844741336318	0.0440262268669531	0.236014805684998
citations	Biophys J	any_affil_nature_indexTRUE	0.0897380769875115	0.0495751310192898	1.81014301207987	0.0704333892227077	-0.00742739433915091	0.186903548314174
citations	Biophys J	last_author_pub_age	-0.00361691557337804	0.00305423092591408	-1.18423120619	0.236471409202972	-0.00960309818863805	0.00236926704188198
citations	Cell	(Intercept)	5.30400343154079	0.396106766660011	13.3903378532621	1.11309464038937e-38	4.52764843485456	6.08035842822702
citations	Cell	preprintTRUE	0.392727112345387	0.125017157058249	3.14138572326039	0.00171480366193741	0.14769798706163	0.637756237629143
citations	Cell	ns(pub_date, df = 3)1	-0.874112934994401	0.114278737982352	-7.64895509372348	3.62844677571366e-14	-1.0980951456385	-0.650130724350302
citations	Cell	ns(pub_date, df = 3)2	-3.05244123305026	0.226556508385558	-13.47320037196	4.1051391533009e-39	-3.4964838299491	-2.60839863615142
citations	Cell	ns(pub_date, df = 3)3	-2.91829267678557	0.0922044785356997	-31.6502270077442	2.44192386884157e-168	-3.09901013392884	-2.7375752196423
citations	Cell	log2(authors)	0.328547539840977	0.025312616612808	12.9795960989167	1.45609026883221e-36	0.278935722925403	0.378159356756551
citations	Cell	log2(references + 1)	0.129002496326515	0.0639065276863861	2.01861219810878	0.0437075998214432	0.00374800368418673	0.254256988968844
citations	Cell	any_affil_usaTRUE	0.052026884929595	0.0665156713530943	0.782174844983726	0.434236944332	-0.0783414353299724	0.182395205189162
citations	Cell	any_affil_nature_indexTRUE	-0.132433990122408	0.092310162212968	-1.43466317193627	0.151594369861119	-0.313358583466876	0.0484906032220593
citations	Cell	last_author_pub_age	-0.00916781304949681	0.00307484923656032	-2.98154879936565	0.00291479658201273	-0.0151944068110455	-0.00314121928794811
citations	Cell Rep	(Intercept)	3.82003060091956	0.252993868376026	15.0993011231475	8.80975720622461e-50	3.32417173059308	4.31588947124604
citations	Cell Rep	preprintTRUE	0.626276443083181	0.119337184197308	5.24795726743238	1.64022895243518e-07	0.392379860040034	0.860173026126328
citations	Cell Rep	ns(pub_date, df = 3)1	-0.982534494753802	0.0761515819743092	-12.9023517211405	3.77979357913799e-37	-1.1317888527892	-0.833280136718406
citations	Cell Rep	ns(pub_date, df = 3)2	-2.76281963405164	0.186496391103559	-14.8143329621723	4.79163667192247e-48	-3.12834584386131	-2.39729342424197
citations	Cell Rep	ns(pub_date, df = 3)3	-1.75748529927904	0.0611236584438211	-28.7529467970957	1.39457442455225e-161	-1.87728546843226	-1.63768513012582
citations	Cell Rep	log2(authors)	0.234785908323829	0.0209306287749872	11.2173366050239	1.16793990627986e-28	0.193762629751077	0.275809186896582
citations	Cell Rep	log2(references + 1)	0.139819219813602	0.0429137905229697	3.25814191917547	0.00113339590966834	0.0557097359484857	0.223928703678719
citations	Cell Rep	any_affil_usaTRUE	0.0875965739784021	0.0376763520017012	2.32497493320072	0.0201367785611083	0.0137522809862142	0.16144086697059
citations	Cell Rep	any_affil_nature_indexTRUE	0.0580733583524215	0.0444454505162172	1.30662098545343	0.191437216946783	-0.0290381239360214	0.145184840640864
citations	Cell Rep	last_author_pub_age	-0.0053296794819467	0.00220784912665848	-2.41396906047336	0.0158367015665314	-0.00965698425349552	-0.00100237471039787
citations	Development	(Intercept)	3.70124657058372	0.140815271336613	26.284411736395	3.44508567611232e-124	3.42525371029072	3.97723943087672
citations	Development	preprintTRUE	0.527159216932301	0.113944520888435	4.62645516275814	4.06222841045734e-06	0.303832059755297	0.750486374109305
citations	Development	ns(pub_date, df = 3)1	-1.08374324577368	0.120417922063746	-8.99985008211632	7.14850029708281e-19	-1.31975803611177	-0.847728455435587
citations	Development	ns(pub_date, df = 3)2	-3.6437428174878	0.25233365090753	-14.4401779326019	3.54529077521669e-44	-4.13830768535406	-3.14917794962153
citations	Development	ns(pub_date, df = 3)3	-2.85390181100941	0.0989682425075048	-28.8365412853825	4.85580689610788e-144	-3.04787600193735	-2.65992762008147
citations	Development	log2(authors)	0.230783685552496	0.0328908913586686	7.0166443054354	3.52250429135923e-12	0.166318723070086	0.295248648034906
citations	Development	log2(references + 1)	0.0569406391188615	0.0186869033275379	3.04708801243442	0.00235375293548959	0.0203149816143056	0.0935662966234175
citations	Development	any_affil_usaTRUE	0.0420744887611929	0.0557628923931846	0.754524863318162	0.450660476084515	-0.0672187720032313	0.151367749525617
citations	Development	any_affil_nature_indexTRUE	0.0147271354892817	0.0603311480398881	0.244105009895466	0.807185107204966	-0.103519741814853	0.132974012793417
citations	Development	last_author_pub_age	-0.00549295005190409	0.00347639541550499	-1.58007056027203	0.11431563427733	-0.012306559862314	0.00132065975850585
citations	Elife	(Intercept)	2.09284134163318	0.171500303500181	12.2031349153325	1.03498214892343e-33	1.75670692343514	2.42897575983123
citations	Elife	preprintTRUE	0.420884775313929	0.0459841620009027	9.15282038423723	8.28050227609859e-20	0.330757473932905	0.511012076694954
citations	Elife	ns(pub_date, df = 3)1	-1.28052575626366	0.068167719930983	-18.7849286665321	8.29368272997241e-76	-1.4141320322366	-1.14691948029072
citations	Elife	ns(pub_date, df = 3)2	-2.98568901780959	0.159855299899574	-18.677447789878	5.38488691887237e-75	-3.2989996483506	-2.67237838726857
citations	Elife	ns(pub_date, df = 3)3	-2.96864004659415	0.058944783826841	-50.3630661419502	0	-3.08416969997126	-2.85311039321704
citations	Elife	log2(authors)	0.16186344843211	0.0181985093757673	8.89432453449421	8.40819056837502e-19	0.126195025483292	0.197531871380929
citations	Elife	log2(references + 1)	0.364771343977087	0.027656136081145	13.1895266535724	5.43508731773097e-39	0.310566313306505	0.41897637464767
citations	Elife	any_affil_usaTRUE	0.0559333296211542	0.0348310511177326	1.60584673233357	0.108378912140742	-0.0123342761132752	0.124200935355584
citations	Elife	any_affil_nature_indexTRUE	0.168966665358252	0.040885908976299	4.13263810414975	3.65252459412457e-05	0.0888317562895229	0.249101574426981
citations	Elife	last_author_pub_age	0.000809709017964781	0.00194250629978294	0.416837267428816	0.676817651526613	-0.00299753336935195	0.00461695140528151
citations	Evolution	(Intercept)	2.20698443794866	0.379355480947103	5.81772123718545	8.66817899992511e-09	1.46346135795447	2.95050751794285
citations	Evolution	preprintTRUE	0.21139385781707	0.137539786941211	1.53696513945763	0.124702751904203	-0.0581791710290153	0.480966886663155
citations	Evolution	ns(pub_date, df = 3)1	-0.949380553376408	0.147959155227427	-6.41650428401756	2.40306425683626e-10	-1.23937516880514	-0.659385937947679
citations	Evolution	ns(pub_date, df = 3)2	-3.22081486528224	0.290121234664874	-11.1016171187975	1.04042739769433e-26	-3.78944203637569	-2.65218769418879
citations	Evolution	ns(pub_date, df = 3)3	-2.44385290342169	0.139750487501598	-17.4872585213254	4.04995208411234e-58	-2.71775882574674	-2.16994698109665
citations	Evolution	log2(authors)	0.019997010461255	0.0442816968730399	0.451586363516928	0.651691098111515	-0.066793520584223	0.106787541506733
citations	Evolution	log2(references + 1)	0.338613328810406	0.058324283653837	5.80570060354491	9.28618206136622e-09	0.224299833424788	0.452926824196025
citations	Evolution	any_affil_usaTRUE	0.0617484563921953	0.0704089773406957	0.876996921761926	0.380755254833101	-0.0762506033838649	0.199747516168256
citations	Evolution	any_affil_nature_indexTRUE	0.0208044606392515	0.0712407977882003	0.292030146842311	0.770340342410517	-0.118824937255522	0.160433858534025
citations	Evolution	last_author_pub_age	-0.000158979600919682	0.00489753507271847	-0.0324611459763243	0.974112510393461	-0.00975797195646963	0.00944001275463026
citations	G3 (Bethesda)	(Intercept)	2.65856444715533	0.244522502492402	10.8724735762834	2.30009330689758e-26	2.17930914886061	3.13781974545004
citations	G3 (Bethesda)	preprintTRUE	0.423122599249823	0.0849983524303965	4.97800942196273	7.32854960883994e-07	0.256528889741003	0.589716308758642
citations	G3 (Bethesda)	ns(pub_date, df = 3)1	-1.02211537942002	0.136049189531605	-7.51283695947762	1.10226248293802e-13	-1.28876689102783	-0.755463867812207
citations	G3 (Bethesda)	ns(pub_date, df = 3)2	-2.94092809894358	0.298354979217789	-9.8571443541983	4.03634586696904e-22	-3.52569311281864	-2.35616308506852
citations	G3 (Bethesda)	ns(pub_date, df = 3)3	-2.31599019427773	0.122772232971007	-18.8641204792997	5.40149105504545e-70	-2.55661934920246	-2.07536103935299
citations	G3 (Bethesda)	log2(authors)	0.186826132784044	0.0349485500768218	5.34574774556812	1.07063717950504e-07	0.118328233321579	0.255324032246509
citations	G3 (Bethesda)	log2(references + 1)	0.0486555342044492	0.0341206178744255	1.42598631664634	0.154123580233034	-0.0182196479596784	0.115530716368577
citations	G3 (Bethesda)	any_affil_usaTRUE	-0.0122934725840253	0.0663063049729752	-0.185404277753613	0.852942225831729	-0.142251442278986	0.117664497110935
citations	G3 (Bethesda)	any_affil_nature_indexTRUE	0.222644706306677	0.0662377964404789	3.36129397823107	0.000799370579699787	0.092821010868043	0.352468401745311
citations	G3 (Bethesda)	last_author_pub_age	-0.0042623444823507	0.00384379781193772	-1.10888883622159	0.267692812655714	-0.0117960497576025	0.00327136079290109
citations	Genetics	(Intercept)	2.07478443651099	0.344912917325935	6.0153862969138	2.38332548485773e-09	1.39876754074952	2.75080133227247
citations	Genetics	preprintTRUE	0.640455680650677	0.0877872602860038	7.29554241200972	5.41032055895829e-13	0.468395812188667	0.812515549112688
citations	Genetics	ns(pub_date, df = 3)1	-1.28636293134486	0.147147106577696	-8.74201988243402	7.63955804980617e-18	-1.57476596066642	-0.997959902023298
citations	Genetics	ns(pub_date, df = 3)2	-3.17591825806753	0.318741935242356	-9.96391722241603	1.61578751864585e-22	-3.80064097150514	-2.55119554462991
citations	Genetics	ns(pub_date, df = 3)3	-2.52491371268884	0.130107391379705	-19.4063818043984	3.97159353470345e-73	-2.77991951391552	-2.26990791146216
citations	Genetics	log2(authors)	0.134186127592497	0.0401026456524577	3.34606670979758	0.000845184370631615	0.0555863864289083	0.212785868756086
citations	Genetics	log2(references + 1)	0.245878560783458	0.05540968817682	4.43746515950108	9.94381045858322e-06	0.137277567562296	0.354479554004619
citations	Genetics	any_affil_usaTRUE	0.0221511021086738	0.0743967559743688	0.297742849383181	0.765951277357772	-0.123663860167704	0.167966064385052
citations	Genetics	any_affil_nature_indexTRUE	0.365547468214105	0.0751174806845638	4.86634355788803	1.28903336464259e-06	0.218319911462977	0.512775024965234
citations	Genetics	last_author_pub_age	-0.00288133615576417	0.00419176027773065	-0.687380948541284	0.491976304623487	-0.0110970353319418	0.00533436302041351
citations	Genome Biol	(Intercept)	5.98389519547868	0.453343123508541	13.1994837578383	1.04207429184844e-35	5.09535900076304	6.87243139019431
citations	Genome Biol	preprintTRUE	0.505168888140701	0.113156102025358	4.46435392434687	9.34895956629373e-06	0.28338700354006	0.726950772741343
citations	Genome Biol	ns(pub_date, df = 3)1	-1.36451670847622	0.19703167683834	-6.9253671814191	9.80514102393028e-12	-1.7506916988929	-0.978341718059535
citations	Genome Biol	ns(pub_date, df = 3)2	-2.99541938672262	0.384930315531991	-7.7817185756929	2.55081909718568e-14	-3.74986894172296	-2.24096983172228
citations	Genome Biol	ns(pub_date, df = 3)3	-3.1955696461628	0.149520525379984	-21.3721135479007	1.62791891690083e-78	-3.48862449085708	-2.90251480146852
citations	Genome Biol	log2(authors)	0.271601816897714	0.0431814109066957	6.28978560901074	5.5770543083081e-10	0.186967806718965	0.356235827076463
citations	Genome Biol	log2(references + 1)	-0.197607395259608	0.0749495771350197	-2.63653782733988	0.00856007364295941	-0.344505867100753	-0.0507089234184624
citations	Genome Biol	any_affil_usaTRUE	-0.0203793285058021	0.0925780792678105	-0.220131252095311	0.825832662730405	-0.201829029628605	0.161070372617001
citations	Genome Biol	any_affil_nature_indexTRUE	-0.0479602068438069	0.107394304920307	-0.446580541485848	0.655315089394243	-0.258449176632321	0.162528762944707
citations	Genome Biol	last_author_pub_age	-0.00541578654201323	0.00644205357905539	-0.840692564188104	0.400805220074604	-0.0180419795434391	0.00721040645941269
citations	Genome Biol Evol	(Intercept)	0.752396829460204	0.341432801428399	2.20364542103898	0.0277873206738078	0.0832008355199255	1.42159282340048
citations	Genome Biol Evol	preprintTRUE	0.320877187562597	0.11060520058959	2.90110397930781	0.0038038593257733	0.104094977904173	0.537659397221021
citations	Genome Biol Evol	ns(pub_date, df = 3)1	-1.19733267119893	0.139331235774405	-8.59342605083587	3.40613316032973e-17	-1.47041687523822	-0.924248467159634
citations	Genome Biol Evol	ns(pub_date, df = 3)2	-3.6957137755422	0.296725829547066	-12.4549783252219	4.19445932419811e-33	-4.27728571473722	-3.11414183634717
citations	Genome Biol Evol	ns(pub_date, df = 3)3	-2.70773704825594	0.121433907627047	-22.2980310950057	5.33801753946514e-89	-2.94574313370691	-2.46973096280496
citations	Genome Biol Evol	log2(authors)	0.221205262127431	0.0387982592625176	5.70142234038665	1.58310363385326e-08	0.145162071310049	0.297248452944813
citations	Genome Biol Evol	log2(references + 1)	0.508294303053396	0.0515090482032992	9.86805854084563	6.14917594473486e-22	0.407338423696992	0.6092501824098
citations	Genome Biol Evol	any_affil_usaTRUE	-0.201910972271501	0.0809892366042234	-2.49305933402231	0.0128331554568105	-0.360646959151171	-0.0431749853918299
citations	Genome Biol Evol	any_affil_nature_indexTRUE	0.113396005903558	0.0675102932950357	1.67968468760744	0.0933457550272346	-0.0189217375404473	0.245713749347564
citations	Genome Biol Evol	last_author_pub_age	-0.00624573991836242	0.0042857732936916	-1.45731924914362	0.145357005508185	-0.0146457012199015	0.00215422138317672
citations	Genome Res	(Intercept)	4.442698589071	0.564938963727988	7.86403288552445	1.60278808323717e-14	3.33543856670076	5.54995861144123
citations	Genome Res	preprintTRUE	0.534930382907814	0.108270411024962	4.9406885763506	9.96896864515555e-07	0.32272427670754	0.747136489108088
citations	Genome Res	ns(pub_date, df = 3)1	-1.03461293368523	0.194634185917557	-5.31567940548466	1.47329084583362e-07	-1.41608892824392	-0.653136939126546
citations	Genome Res	ns(pub_date, df = 3)2	-3.52654885366715	0.392635378669853	-8.98173991761566	3.0073886034389e-18	-4.29610005491631	-2.756997652418
citations	Genome Res	ns(pub_date, df = 3)3	-3.19892418352159	0.158591234732638	-20.1708763344614	2.68613075972571e-70	-3.5097572918613	-2.88809107518188
citations	Genome Res	log2(authors)	0.245442626345142	0.0465850502124208	5.26869940519461	1.88434997351426e-07	0.154137605710808	0.336747646979477
citations	Genome Res	log2(references + 1)	0.00967428355287496	0.0901864279431073	0.107269838417127	0.914608793806301	-0.167087867109932	0.186436434215682
citations	Genome Res	any_affil_usaTRUE	0.0831843971695019	0.0956799531526786	0.869402570011324	0.384955474014744	-0.104344865052228	0.270713659391232
citations	Genome Res	any_affil_nature_indexTRUE	0.152295312435688	0.111884170263612	1.36118730716654	0.173937330814541	-0.0669936317211377	0.371584256592514
citations	Genome Res	last_author_pub_age	-0.0016141206325842	0.00579038917993999	-0.278758574324521	0.780520862574023	-0.012963074881737	0.00973483361656858
citations	Gigascience	(Intercept)	1.84673965709003	0.454848785834621	4.06011781190395	6.05902014709078e-05	0.955252418442398	2.73822689573766
citations	Gigascience	preprintTRUE	0.43769443361831	0.157544271264689	2.77823135112887	0.00576111407179562	0.128913335968911	0.746475531267708
citations	Gigascience	ns(pub_date, df = 3)1	-1.75996992020562	0.258048222318708	-6.82031406529873	4.01732592027718e-11	-2.26573514222487	-1.25420469818636
citations	Gigascience	ns(pub_date, df = 3)2	-3.91282319694081	0.70629809938062	-5.53990333595986	5.9687989701335e-08	-5.29714203407591	-2.5285043598057
citations	Gigascience	ns(pub_date, df = 3)3	-2.51832044675374	0.249542573246246	-10.0917467267948	3.5049230100411e-21	-3.00741490292583	-2.02922599058165
citations	Gigascience	log2(authors)	0.26062278631145	0.0600833256776364	4.33768909047682	1.8873196892677e-05	0.142861631911892	0.378383940711008
citations	Gigascience	log2(references + 1)	0.323221078727203	0.0792114674092375	4.08048341103588	5.57396756467957e-05	0.167969455442529	0.478472702011877
citations	Gigascience	any_affil_usaTRUE	0.116817051012825	0.138640357845942	0.842590518574923	0.400034551511154	-0.154913057168966	0.388547159194616
citations	Gigascience	any_affil_nature_indexTRUE	0.24677322913082	0.137181145521644	1.79888590514711	0.0729005763545399	-0.02209687544955	0.515643333711191
citations	Gigascience	last_author_pub_age	-0.00129788663434741	0.0124903631868711	-0.103911040450101	0.917299632366072	-0.0257785486344397	0.0231827753657449
citations	ISME J	(Intercept)	3.06588458712967	0.370171810046442	8.28232864827019	4.40144752327134e-16	2.34036117134665	3.7914080029127
citations	ISME J	preprintTRUE	0.236855253466156	0.154707820342336	1.53098436098476	0.126128206353899	-0.0663665025315161	0.540077009463828
citations	ISME J	ns(pub_date, df = 3)1	-1.02888777915934	0.151534183719103	-6.78980645757513	2.04905772872637e-11	-1.32588932167546	-0.731886236643224
citations	ISME J	ns(pub_date, df = 3)2	-3.18744418685697	0.304477678404983	-10.4685644069362	2.88063730605202e-24	-3.78420947062711	-2.59067890308684
citations	ISME J	ns(pub_date, df = 3)3	-3.29715990452121	0.120659194306024	-27.3262217892715	6.65748487213966e-120	-3.53364757976463	-3.06067222927778
citations	ISME J	log2(authors)	0.203097228362713	0.0449860707434895	4.51466920773705	7.19259032422337e-06	0.114926149899502	0.291268306825923
citations	ISME J	log2(references + 1)	0.263428915627408	0.0582040467324741	4.52595533156343	6.82735181343905e-06	0.149351080277273	0.377506750977543
citations	ISME J	any_affil_usaTRUE	0.179293301903833	0.0708792267924656	2.52956063458204	0.0115919460573652	0.0403725701385543	0.318214033669112
citations	ISME J	any_affil_nature_indexTRUE	-0.0971949917291639	0.0742150751583076	-1.30963947044233	0.190655411846169	-0.24265386614938	0.0482638826910522
citations	ISME J	last_author_pub_age	-0.00427816812111438	0.00500014231008674	-0.855609271856937	0.392443960873292	-0.0140782669664593	0.00552193072423054
citations	J Biol Chem	(Intercept)	1.96227038346074	0.137550499449092	14.2658179455538	1.38340780756027e-45	1.69267635848503	2.23186440843646
citations	J Biol Chem	preprintTRUE	0.222727459182477	0.118891659166154	1.87336488315981	0.061056415114079	-0.0102959108453951	0.45575082921035
citations	J Biol Chem	ns(pub_date, df = 3)1	-0.738592743648541	0.049371872868031	-14.959787845658	6.87920687794939e-50	-0.835359836319172	-0.64182565097791
citations	J Biol Chem	ns(pub_date, df = 3)2	-2.67184012637829	0.0923002962517422	-28.9472540704642	7.35439395313773e-175	-2.85274538279409	-2.4909348699625
citations	J Biol Chem	ns(pub_date, df = 3)3	-2.6734508608691	0.0408522500977595	-65.4419488393301	0	-2.75351979974813	-2.59338192199006
citations	J Biol Chem	log2(authors)	0.168309896804243	0.0151502599157222	11.1093735513791	1.87038086567304e-28	0.138615933013006	0.198003860595479
citations	J Biol Chem	log2(references + 1)	0.257153109438875	0.0231100255971781	11.1273398792892	1.53422050197665e-28	0.211858291586607	0.302447927291143
citations	J Biol Chem	any_affil_usaTRUE	0.102398637249576	0.0231177853623129	4.42943109146209	9.58068527719861e-06	0.0570886105371155	0.147708663962037
citations	J Biol Chem	any_affil_nature_indexTRUE	0.0628003189508019	0.0234936483946777	2.67307647989781	0.0075319871242153	0.0167536142317863	0.108847023669818
citations	J Biol Chem	last_author_pub_age	-0.000894038713177041	0.00130390341133781	-0.685663297912347	0.492946397493074	-0.00344964243871806	0.00166156501236398
citations	J Cell Biol	(Intercept)	3.9377960416331	0.446323992434215	8.82272991903636	5.64182262010104e-18	3.06301709102592	4.81257499224029
citations	J Cell Biol	preprintTRUE	0.480865606122983	0.13983226187641	3.4388745463332	0.000610709036334177	0.206799408968447	0.75493180327752
citations	J Cell Biol	ns(pub_date, df = 3)1	-1.00211109136428	0.140894329972215	-7.11250120258136	2.30945884534478e-12	-1.27825890373572	-0.725963278992832
citations	J Cell Biol	ns(pub_date, df = 3)2	-2.19232208101789	0.310401227187771	-7.0628653787238	3.24383018195314e-12	-2.80069730706295	-1.58394685497282
citations	J Cell Biol	ns(pub_date, df = 3)3	-2.48358618783951	0.127839622642914	-19.427358564541	1.41879770245309e-70	-2.73414724401681	-2.2330251316622
citations	J Cell Biol	log2(authors)	0.122357217615845	0.0420902109393217	2.907023150638	0.00373763963779073	0.0398619200730807	0.204852515158609
citations	J Cell Biol	log2(references + 1)	0.0536741368250366	0.071798610003691	0.747565124481899	0.45491606033531	-0.0870485529222349	0.194396826572308
citations	J Cell Biol	any_affil_usaTRUE	0.109656026052626	0.0707871743470357	1.54909455087209	0.121707445241959	-0.0290842862349217	0.248396338340173
citations	J Cell Biol	any_affil_nature_indexTRUE	0.182543264700453	0.077056712495373	2.36894695853283	0.0180472139759526	0.0315148834424639	0.333571645958441
citations	J Cell Biol	last_author_pub_age	0.0056208238309307	0.00395078630294574	1.42271016449049	0.15516364571008	-0.00212257503345711	0.0133642226953185
citations	J Neurophysiol	(Intercept)	1.2114827752957	0.256341188912987	4.72605584936618	2.47352731136606e-06	0.70906327727207	1.71390227331933
citations	J Neurophysiol	preprintTRUE	0.483709845278152	0.143227302582666	3.3772181459535	0.00074838155618203	0.202989490613306	0.764430199942998
citations	J Neurophysiol	ns(pub_date, df = 3)1	-0.845649223851792	0.108980213790251	-7.75965833100103	1.44197423255609e-14	-1.05924651790816	-0.632051929795425
citations	J Neurophysiol	ns(pub_date, df = 3)2	-2.44996848616743	0.203395928842258	-12.045317229862	3.76601916968831e-32	-2.84861718130033	-2.05131979103453
citations	J Neurophysiol	ns(pub_date, df = 3)3	-2.37294507629618	0.101685752522697	-23.3360625006587	5.30455964970574e-105	-2.57224548898152	-2.17364466361084
citations	J Neurophysiol	log2(authors)	0.237658614260532	0.0359224123116086	6.61588682293841	4.90312564198617e-11	0.167251979891981	0.308065248629083
citations	J Neurophysiol	log2(references + 1)	0.270253550795587	0.0416964536739201	6.48145170591863	1.18013732667003e-10	0.188530003311661	0.351977098279513
citations	J Neurophysiol	any_affil_usaTRUE	0.113890057150541	0.0535248264658401	2.12779871828686	0.0334941724658543	0.00898332499873834	0.218796789302344
citations	J Neurophysiol	any_affil_nature_indexTRUE	0.144821987602426	0.053234993624682	2.72042838256827	0.0065847098902212	0.0404833173808296	0.249160657824022
citations	J Neurophysiol	last_author_pub_age	-0.00444429725501319	0.00299242218115241	-1.48518390319566	0.137676463481805	-0.0103093369566107	0.00142074244658432
citations	J Neurosci	(Intercept)	4.00514095896161	0.0800325883278278	50.0438764088928	0	3.84827996824955	4.16200194967368
citations	J Neurosci	preprintTRUE	0.507895648838731	0.116605593346183	4.35567140703852	1.36584731027926e-05	0.279352885484289	0.736438412193174
citations	J Neurosci	ns(pub_date, df = 3)1	-0.535739322078443	0.0766015642505971	-6.99384310646459	3.20749810624452e-12	-0.685875629169045	-0.385603014987842
citations	J Neurosci	ns(pub_date, df = 3)2	-1.92641558741194	0.133107176197275	-14.4726651293154	4.1471644448611e-46	-2.18730085884243	-1.66553031598146
citations	J Neurosci	ns(pub_date, df = 3)3	-2.02659688866847	0.0673309174956387	-30.0990535113345	1.28814688976398e-176	-2.15856306200596	-1.89463071533099
citations	J Neurosci	log2(authors)	0.183536455959585	0.0215762621579246	8.50640646726544	2.65210810580113e-17	0.141247759209058	0.225825152710111
citations	J Neurosci	log2(references + 1)	0.0375228127101697	0.00771707343937345	4.86231121226912	1.21291799894161e-06	0.0223976267029471	0.0526479987173923
citations	J Neurosci	any_affil_usaTRUE	0.0416773731273086	0.0451063271578891	0.923980642037692	0.355562098376887	-0.046729403577035	0.130084149831652
citations	J Neurosci	any_affil_nature_indexTRUE	0.0764422732570079	0.0383885962549137	1.9912755535369	0.0465306573778424	0.0012020071803278	0.151682539333688
citations	J Neurosci	last_author_pub_age	-0.00798990178919541	0.00213051472265715	-3.75022134521112	0.000179627989367029	-0.0121656339141358	-0.00381416966425505
citations	J Virol	(Intercept)	2.6762067264214	0.21527584497208	12.4315235031059	1.10823875353328e-34	2.25427382353469	3.0981396293081
citations	J Virol	preprintTRUE	0.126800378403311	0.152037549295219	0.834006987031189	0.404339551277406	-0.17118774251305	0.424788499319673
citations	J Virol	ns(pub_date, df = 3)1	-0.87203076305234	0.0812902652479799	-10.7273701271877	2.12546659203881e-26	-1.03135675523209	-0.712704770872591
citations	J Virol	ns(pub_date, df = 3)2	-2.70846320160066	0.153982085355862	-17.5894695499235	3.60203266610194e-66	-3.01026254316252	-2.40666386003879
citations	J Virol	ns(pub_date, df = 3)3	-2.41549850886567	0.0690318335975911	-34.9910814037824	2.74633565838134e-227	-2.55079841650371	-2.28019860122763
citations	J Virol	log2(authors)	0.257903022873806	0.0235397922732439	10.956044976104	1.90703068110467e-27	0.211765877814694	0.304040167932918
citations	J Virol	log2(references + 1)	0.117716948172757	0.0354144126330612	3.32398420361947	0.00089744327343714	0.0483059748783171	0.187127921467197
citations	J Virol	any_affil_usaTRUE	0.0587554190566605	0.0383273372684845	1.53298985121446	0.125377611430136	-0.0163647816128889	0.13387561972621
citations	J Virol	any_affil_nature_indexTRUE	0.0555949884568175	0.0387677087323512	1.43405401749792	0.151654953811351	-0.0203883244217299	0.131578301335365
citations	J Virol	last_author_pub_age	-0.00452362950527517	0.00213917246886589	-2.11466329672493	0.0345360896401516	-0.00871633050097195	-0.000330928509578382
citations	MBio	(Intercept)	3.10418282676516	0.296677535907213	10.4631542704197	7.14642473206737e-25	2.52270554136493	3.68566011216539
citations	MBio	preprintTRUE	0.223953673405692	0.104595875631533	2.14113292759868	0.0324053194503181	0.0189495242364563	0.428957822574927
citations	MBio	ns(pub_date, df = 3)1	-0.938746078477697	0.1061047600968	-8.84735121799698	2.19926213685623e-18	-1.14670758685569	-0.730784570099707
citations	MBio	ns(pub_date, df = 3)2	-2.89556481919044	0.226685098378561	-12.7735119771962	9.61786562231808e-36	-3.33985944784434	-2.45127019053654
citations	MBio	ns(pub_date, df = 3)3	-2.63372840743863	0.0899112090084888	-29.2925480202359	5.17209364171206e-153	-2.80995113890172	-2.45750567597554
citations	MBio	log2(authors)	0.229227557981293	0.0313219011048852	7.31844332225227	3.85286960893022e-13	0.167837759888393	0.290617356074193
citations	MBio	log2(references + 1)	0.147673097413328	0.0494688025344081	2.98517631007166	0.00287466389786357	0.0507160260875642	0.244630168739092
citations	MBio	any_affil_usaTRUE	0.0798799434284851	0.0581921373759481	1.37269306525766	0.170029054749758	-0.0341745500117802	0.19393443686875
citations	MBio	any_affil_nature_indexTRUE	0.0998369466737915	0.0580067079942008	1.72112760965116	0.0854098273370084	-0.0138541118565736	0.213528005204157
citations	MBio	last_author_pub_age	-0.00870740937819948	0.00284825623672758	-3.05710183863359	0.00226975129888415	-0.0142898890209271	-0.00312492973547184
citations	Mol Biol Cell	(Intercept)	1.16858834804007	0.241290214281568	4.84308222577322	1.44867130063408e-06	0.695668218226247	1.6415084778539
citations	Mol Biol Cell	preprintTRUE	0.348839893264692	0.11970541812766	2.91415291572409	0.00363400257307489	0.11422158498017	0.583458201549213
citations	Mol Biol Cell	ns(pub_date, df = 3)1	-0.711129554869063	0.124288913642752	-5.7215847659035	1.337649276124e-08	-0.954731349286465	-0.467527760451661
citations	Mol Biol Cell	ns(pub_date, df = 3)2	-2.10290731902311	0.240026010980703	-8.76116430228127	6.61766247208258e-18	-2.5733496558981	-1.63246498214811
citations	Mol Biol Cell	ns(pub_date, df = 3)3	-2.63764115418551	0.108080260125371	-24.4044671166215	8.91790523291816e-107	-2.84947457147096	-2.42580773690007
citations	Mol Biol Cell	log2(authors)	0.207134147748656	0.0358015188325187	5.78562459089068	9.25238164435201e-09	0.136964460245087	0.277303835252225
citations	Mol Biol Cell	log2(references + 1)	0.350422045107177	0.0391813074770942	8.94360264297045	1.42864159363497e-18	0.273628093584883	0.427215996629472
citations	Mol Biol Cell	any_affil_usaTRUE	-0.00936287751320376	0.061550421519044	-0.152117195660583	0.879120572112922	-0.129999486923789	0.111273731897382
citations	Mol Biol Cell	any_affil_nature_indexTRUE	0.175651604309586	0.0637786094516898	2.75408331758372	0.00597631592690169	0.0506478268002286	0.300655381818944
citations	Mol Biol Cell	last_author_pub_age	-0.00619935191235978	0.00334489745566068	-1.85337577445563	0.0640786234347316	-0.0127552304574344	0.000356526632714806
citations	Mol Biol Evol	(Intercept)	4.08958608593056	0.330446721043499	12.3759318083602	1.67101796805768e-32	3.44192241387595	4.73724975798517
citations	Mol Biol Evol	preprintTRUE	0.34072084954376	0.133554034182755	2.55118350882249	0.010907066563847	0.0789597525555282	0.602481946531991
citations	Mol Biol Evol	ns(pub_date, df = 3)1	-0.892605315246917	0.20956190119608	-4.25938737028224	2.27481484164308e-05	-1.30333909412297	-0.48187153637086
citations	Mol Biol Evol	ns(pub_date, df = 3)2	-3.3887975726122	0.386933222305575	-8.75809410321439	1.03419033174269e-17	-4.14717275275316	-2.63042239247124
citations	Mol Biol Evol	ns(pub_date, df = 3)3	-2.65649108424444	0.197789061223623	-13.4309302436143	1.72894658684456e-37	-3.04415052077873	-2.26883164771015
citations	Mol Biol Evol	log2(authors)	0.0866761746564753	0.0491695891692051	1.76280046510457	0.0782876455745148	-0.00969444924979733	0.183046798562748
citations	Mol Biol Evol	log2(references + 1)	0.0689545214166895	0.045536639068083	1.5142646191695	0.130324455382759	-0.0202956511337527	0.158204693967132
citations	Mol Biol Evol	any_affil_usaTRUE	0.0267465853248157	0.105676867601138	0.253097824831134	0.800252826307116	-0.180376269172422	0.233869439822054
citations	Mol Biol Evol	any_affil_nature_indexTRUE	0.0763027320323881	0.100612394861912	0.758383021665587	0.448428534420056	-0.120893938295282	0.273499402360059
citations	Mol Biol Evol	last_author_pub_age	-0.00345647156125677	0.00637246776702977	-0.542407068599084	0.587677982346075	-0.0159462788772775	0.00903333575476396
citations	Mol Cell	(Intercept)	5.17490613881917	0.448544727231924	11.5371017083508	3.06912149464152e-29	4.29577462798926	6.05403764964909
citations	Mol Cell	preprintTRUE	0.454628258629034	0.13646379399244	3.33149361693858	0.000890816334937855	0.187164137210159	0.722092380047909
citations	Mol Cell	ns(pub_date, df = 3)1	-0.925964402676677	0.124646481483582	-7.4287247554488	2.10960538273255e-13	-1.17026701718414	-0.681661788169218
citations	Mol Cell	ns(pub_date, df = 3)2	-2.95989990892408	0.236977944602106	-12.4901914981744	1.07450592480647e-33	-3.42436814547453	-2.49543167237362
citations	Mol Cell	ns(pub_date, df = 3)3	-2.8437524120757	0.100177261331956	-28.3872045838066	2.89783679212263e-135	-3.04009623635619	-2.64740858779521
citations	Mol Cell	log2(authors)	0.13495525848832	0.0351266303555727	3.8419642625046	0.000128612479597847	0.0661083280931459	0.203802188883494
citations	Mol Cell	log2(references + 1)	0.05777159062418	0.0762299699846152	0.757859285997876	0.448687969330611	-0.0916364050882351	0.207179586336595
citations	Mol Cell	any_affil_usaTRUE	-0.0938995534491126	0.061188296305545	-1.53459990093895	0.125152722935971	-0.213826410483346	0.0260273035851208
citations	Mol Cell	any_affil_nature_indexTRUE	-0.0479346733969022	0.0777468162752189	-0.616548377070727	0.537652698522147	-0.200315633208984	0.104446286415179
citations	Mol Cell	last_author_pub_age	0.00145942824823418	0.00339783839572119	0.429516674504592	0.667626413574058	-0.0052002126326667	0.00811906912913507
citations	Mol Ecol	(Intercept)	2.89082017618928	0.371825872909248	7.77466117021621	1.44816896627e-14	2.16205485676698	3.61958549561157
citations	Mol Ecol	preprintTRUE	0.372021289265665	0.113072750964893	3.29010558327328	0.00102617706837385	0.150402769741607	0.593639808789723
citations	Mol Ecol	ns(pub_date, df = 3)1	-1.18287653504695	0.110554508515623	-10.6994870759142	9.60787570404266e-26	-1.3995593900661	-0.966193680027804
citations	Mol Ecol	ns(pub_date, df = 3)2	-2.78156684043081	0.222256446558654	-12.5151233338771	3.71116898965741e-34	-3.21718147101763	-2.345952209844
citations	Mol Ecol	ns(pub_date, df = 3)3	-2.95405242860103	0.108424859951246	-27.2451578902601	1.02352007506003e-131	-3.16656124913427	-2.74154360806779
citations	Mol Ecol	log2(authors)	0.109873030657639	0.0324819094608208	3.38259149420284	0.000737682769474658	0.0462096579653398	0.173536403349939
citations	Mol Ecol	log2(references + 1)	0.186701777683962	0.0582623472070399	3.20450147709467	0.00138318724400813	0.0725096755033957	0.300893879864528
citations	Mol Ecol	any_affil_usaTRUE	0.126659933213105	0.0529455398702064	2.39226823493737	0.0168746042329602	0.0228885819254708	0.230431284500739
citations	Mol Ecol	any_affil_nature_indexTRUE	0.161359339362805	0.0533900337245203	3.02227453526964	0.00255396145866916	0.0567167961293665	0.266001882596244
citations	Mol Ecol	last_author_pub_age	-0.000411380547960299	0.00372766370553754	-0.110358814650899	0.912140486508055	-0.00771746715729099	0.00689470606137039
citations	Nat Genet	(Intercept)	4.50382251325876	0.472617555688539	9.5295285988632	2.23948842284908e-20	3.57750912564787	5.43013590086965
citations	Nat Genet	preprintTRUE	0.691614936346084	0.111608294841849	6.19680586757568	9.5948294371149e-10	0.472866698080133	0.910363174612034
citations	Nat Genet	ns(pub_date, df = 3)1	-1.15850204145613	0.162984036506807	-7.10807062020301	2.79029792948503e-12	-1.47794488306443	-0.839059199847825
citations	Nat Genet	ns(pub_date, df = 3)2	-3.48271173569352	0.331268075011344	-10.5132730812477	3.52799690661071e-24	-4.13198523194366	-2.83343823944337
citations	Nat Genet	ns(pub_date, df = 3)3	-2.83286755852812	0.139832953473848	-20.2589410303626	7.6008047104703e-73	-3.10693511118872	-2.55880000586751
citations	Nat Genet	log2(authors)	0.195835418000334	0.0281082808582747	6.9671787822158	7.19301636860195e-12	0.140744199850779	0.250926636149889
citations	Nat Genet	log2(references + 1)	0.229347270296457	0.0816812843109994	2.80783134387582	0.00511986556335343	0.0692548948359213	0.389439645756992
citations	Nat Genet	any_affil_usaTRUE	0.0609039525131671	0.0952117018307166	0.639668773292724	0.522587283417974	-0.125707553981804	0.247515459008138
citations	Nat Genet	any_affil_nature_indexTRUE	0.320754738320302	0.139838761702756	2.29374698699138	0.0220863341313537	0.0466758017402215	0.594833674900382
citations	Nat Genet	last_author_pub_age	-0.00389015586499831	0.00517596785674147	-0.751580375432887	0.45254403347625	-0.0140348664493486	0.00625455471935195
citations	Nat Methods	(Intercept)	3.77244778275539	0.524006390395359	7.19924003199486	2.05775762545814e-12	2.74541412991165	4.79948143559913
citations	Nat Methods	preprintTRUE	1.22727050063781	0.138313839752235	8.87308531695927	1.06297248886164e-17	0.956180356159988	1.49836064511564
citations	Nat Methods	ns(pub_date, df = 3)1	-0.963745206846121	0.215587642050617	-4.47031748981162	9.53702877082003e-06	-1.38628922077724	-0.541201192914999
citations	Nat Methods	ns(pub_date, df = 3)2	-3.36554736895581	0.425797691590629	-7.90409961214989	1.54535499642507e-14	-4.20009550917374	-2.53099922873789
citations	Nat Methods	ns(pub_date, df = 3)3	-3.28520675232265	0.162030332123179	-20.2752577821365	2.89152874905742e-68	-3.60278036768714	-2.96763313695816
citations	Nat Methods	log2(authors)	0.178105385162175	0.0560309593322964	3.1786959795906	0.00156477890954575	0.0682867228516456	0.287924047472704
citations	Nat Methods	log2(references + 1)	0.385490512444612	0.0949387966323992	4.06041077113314	5.62958473894421e-05	0.199413890309537	0.571567134579687
citations	Nat Methods	any_affil_usaTRUE	0.160893260623738	0.109902018905761	1.46397001825509	0.143788350360469	-0.0545107382597933	0.376297259507269
citations	Nat Methods	any_affil_nature_indexTRUE	0.0680620443552966	0.13651762155227	0.498558673828324	0.61829484754762	-0.199507577142221	0.335631665852814
citations	Nat Methods	last_author_pub_age	-0.000522385752334506	0.00739382688221998	-0.0706516071657957	0.943701388444646	-0.0150140201494097	0.0139692486447407
citations	Neuroimage	(Intercept)	2.55412859460671	0.218359573440562	11.6968931307331	5.50234323240251e-31	2.12615169498368	2.98210549422974
citations	Neuroimage	preprintTRUE	0.463904106210193	0.0837594949502037	5.53852559027477	3.29386127794726e-08	0.29973851274453	0.628069699675857
citations	Neuroimage	ns(pub_date, df = 3)1	-1.02965423139561	0.0856856240448209	-12.0166509011712	1.4172549470412e-32	-1.1975949685163	-0.861713494274924
citations	Neuroimage	ns(pub_date, df = 3)2	-3.12241422013936	0.172283679853322	-18.1236796358059	5.33016384450581e-70	-3.4600840277759	-2.78474441250282
citations	Neuroimage	ns(pub_date, df = 3)3	-2.8635202522306	0.0708722035371039	-40.4039963387261	2.12365684695673e-289	-3.00242721866831	-2.72461328579288
citations	Neuroimage	log2(authors)	0.24879057306891	0.0253479403276328	9.81502125431837	1.98716639850838e-22	0.199109522944479	0.298471623193341
citations	Neuroimage	log2(references + 1)	0.205264577162494	0.0342553068417227	5.99219788370086	2.29766887530004e-09	0.138125409473349	0.272403744851639
citations	Neuroimage	any_affil_usaTRUE	0.126363607683072	0.0410217103558718	3.08040807140516	0.00208452230851077	0.0459625328013297	0.206764682564815
citations	Neuroimage	any_affil_nature_indexTRUE	0.139910839242574	0.0431211761210586	3.24459701307283	0.0011881273710935	0.0553948870742906	0.224426791410857
citations	Neuroimage	last_author_pub_age	-0.0113634158118955	0.00284926280705155	-3.98819504602121	6.80494592986435e-05	-0.016947868296206	-0.00577896332758493
citations	Neuron	(Intercept)	3.82813616200593	0.363174160198519	10.5407723939208	5.85119544092047e-25	3.11632788790125	4.5399444361106
citations	Neuron	preprintTRUE	0.387501885992805	0.126019297218696	3.07494085862365	0.00215052147781929	0.140508602087113	0.634495169898496
citations	Neuron	ns(pub_date, df = 3)1	-0.966025993125231	0.113975521283181	-8.47573217695634	6.41088137998824e-17	-1.18941390995944	-0.742638076291017
citations	Neuron	ns(pub_date, df = 3)2	-3.34343304407506	0.223867666583305	-14.9348635071019	1.41221768866141e-46	-3.78220560788135	-2.90466048026876
citations	Neuron	ns(pub_date, df = 3)3	-2.97824770203986	0.0964667281495041	-30.8733151747841	1.72440751672816e-156	-3.1673190149193	-2.78917638916041
citations	Neuron	log2(authors)	0.256706621972693	0.0280502188467729	9.15167982734747	2.18145135346975e-19	0.201729203274552	0.311684040670835
citations	Neuron	log2(references + 1)	0.20897440253194	0.0591402311225772	3.53354051151421	0.000424797259133521	0.0930616794943137	0.324887125569566
citations	Neuron	any_affil_usaTRUE	0.177659678087743	0.0636385849238207	2.79169749453751	0.00532206132959142	0.0529303436099608	0.302389012565525
citations	Neuron	any_affil_nature_indexTRUE	0.0967707475473679	0.0776522599169453	1.24620645491672	0.212919159397754	-0.0554248852079882	0.248966380302724
citations	Neuron	last_author_pub_age	-0.00451551065406188	0.00320070990714429	-1.41078410260887	0.158553952904419	-0.0107887867970252	0.00175776548890147
citations	Nucleic Acids Res	(Intercept)	5.48500134695507	0.21246079844825	25.8165336241597	8.35388036877292e-138	5.06858583386988	5.90141686004026
citations	Nucleic Acids Res	preprintTRUE	0.265981967239539	0.0986488571359304	2.69624985997594	0.00703676127983426	0.0726337601370779	0.459330174341999
citations	Nucleic Acids Res	ns(pub_date, df = 3)1	-0.928955716335672	0.091311471345511	-10.1734831631463	4.54035326977663e-24	-1.10792291154823	-0.749988521123109
citations	Nucleic Acids Res	ns(pub_date, df = 3)2	-2.62779412237681	0.18974355617905	-13.8491876893944	8.34811863065987e-43	-2.9996846587863	-2.25590358596732
citations	Nucleic Acids Res	ns(pub_date, df = 3)3	-2.51906943752403	0.0889939002431738	-28.3060909864691	3.00730003412695e-163	-2.6934942768444	-2.34464459820366
citations	Nucleic Acids Res	log2(authors)	0.326360890006634	0.02548056985669	12.8082257124617	5.83563148110358e-37	0.276419890781965	0.376301889231303
citations	Nucleic Acids Res	log2(references + 1)	-0.336933200930225	0.0343597348827338	-9.80604774979035	1.71535397968535e-22	-0.404277043818727	-0.269589358041722
citations	Nucleic Acids Res	any_affil_usaTRUE	0.0943407107496602	0.0432266172183186	2.18246804447331	0.0291228972772002	0.00961809782825684	0.179063323671063
citations	Nucleic Acids Res	any_affil_nature_indexTRUE	-0.00020846557472187	0.0439843554341774	-0.00473953915350286	0.996218604289209	-0.0864162181089181	0.0859992869594744
citations	Nucleic Acids Res	last_author_pub_age	-0.0116144263600257	0.00258458727043089	-4.49372574604123	7.16190024305524e-06	-0.016680124324971	-0.00654872839508051
citations	PLoS Biol	(Intercept)	2.1406792579938	0.306466486016738	6.98503541387845	5.27376647861912e-12	1.54001598293244	2.74134253305515
citations	PLoS Biol	preprintTRUE	0.634131665817273	0.125928427864976	5.03565141381109	5.67342046437971e-07	0.38731648257217	0.880946849062375
citations	PLoS Biol	ns(pub_date, df = 3)1	-1.35370364001233	0.170098534388623	-7.95834981693337	4.83175392201324e-15	-1.68709064123708	-1.02031663878759
citations	PLoS Biol	ns(pub_date, df = 3)2	-3.31378957976891	0.35030646103543	-9.459687297728	2.24417326595507e-20	-4.00037762695004	-2.62720153258778
citations	PLoS Biol	ns(pub_date, df = 3)3	-3.08932674495943	0.129335354667268	-23.8861736831908	1.33291161155159e-99	-3.34281938203499	-2.83583410788387
citations	PLoS Biol	log2(authors)	0.108150700653841	0.0359568453752525	3.00779168820735	0.00269922133283057	0.0376765787206709	0.178624822587012
citations	PLoS Biol	log2(references + 1)	0.406275034965603	0.0498486997058437	8.15016314092492	1.11096090560154e-15	0.308573378865997	0.503976691065209
citations	PLoS Biol	any_affil_usaTRUE	0.0350108970559954	0.0790217804384383	0.443053761402789	0.657825334261124	-0.119868946597575	0.189890740709566
citations	PLoS Biol	any_affil_nature_indexTRUE	0.342638509640444	0.0901525915827328	3.80065069262047	0.000153285449194138	0.165942677025339	0.519334342255549
citations	PLoS Biol	last_author_pub_age	-0.00544671194010601	0.0050988842754963	-1.06821642653889	0.28568784479279	-0.0154403414814164	0.00454691760120435
citations	PLoS Comput Biol	(Intercept)	1.86561610954511	0.27363236132062	6.81796590337914	1.19038011419727e-11	1.32930653635204	2.40192568273817
citations	PLoS Comput Biol	preprintTRUE	0.480221892351035	0.0704063142568519	6.82072193978398	1.16822984302268e-11	0.342228052123397	0.618215732578674
citations	PLoS Comput Biol	ns(pub_date, df = 3)1	-1.09653517020601	0.103338608581499	-10.6110889749519	1.10180219531512e-25	-1.29907512123823	-0.893995219173793
citations	PLoS Comput Biol	ns(pub_date, df = 3)2	-2.74492676602877	0.217744107396312	-12.6062045896506	3.1749842014883e-35	-3.17169737437136	-2.31815615768617
citations	PLoS Comput Biol	ns(pub_date, df = 3)3	-2.68169832250045	0.0899842434729141	-29.8018655155739	4.40377589164656e-164	-2.85806419888344	-2.50533244611745
citations	PLoS Comput Biol	log2(authors)	0.197021323291314	0.0319515795883937	6.16624673425791	8.30455777074089e-10	0.134397378048897	0.259645268533731
citations	PLoS Comput Biol	log2(references + 1)	0.292871495435033	0.041802636923405	7.00605313419968	3.25111652316963e-12	0.210939832606355	0.374803158263711
citations	PLoS Comput Biol	any_affil_usaTRUE	0.100378066439155	0.0499291765838592	2.0104090094609	0.0445104758230878	0.00251867855704999	0.198237454321259
citations	PLoS Comput Biol	any_affil_nature_indexTRUE	0.209559572754577	0.052475765802396	3.99345430314824	6.72680318254772e-05	0.106708961720723	0.312410183788432
citations	PLoS Comput Biol	last_author_pub_age	-0.00648330881023032	0.00357075978089477	-1.81566647101803	0.0695584373645527	-0.0134818693782282	0.000515251757767571
citations	PLoS Genet	(Intercept)	3.19040995978622	0.273609405645097	11.6604542605694	1.31373212864896e-30	2.65414537889042	3.72667454068202
citations	PLoS Genet	preprintTRUE	0.649288607584366	0.0665018193233642	9.76347134846355	4.10887959606218e-22	0.518947436804182	0.779629778364549
citations	PLoS Genet	ns(pub_date, df = 3)1	-0.881359688272444	0.0903165297412832	-9.75856458166793	4.30469174835018e-22	-1.058376833774	-0.704342542770889
citations	PLoS Genet	ns(pub_date, df = 3)2	-3.00886218997019	0.166792473129891	-18.0395561832518	2.33861627284306e-68	-3.33576943019714	-2.68195494974324
citations	PLoS Genet	ns(pub_date, df = 3)3	-2.86351887073322	0.0751194989163474	-38.1195150665477	1.85264992158089e-249	-3.01075038314596	-2.71628735832048
citations	PLoS Genet	log2(authors)	0.198597972569367	0.022067131724843	8.99971845211704	4.4625663700457e-19	0.155347189146573	0.24184875599216
citations	PLoS Genet	log2(references + 1)	0.120832422497933	0.0424482163251045	2.84658421386886	0.00445632068379035	0.0376354472927627	0.204029397703103
citations	PLoS Genet	any_affil_usaTRUE	0.0881595941001989	0.0433112676031672	2.03548866100959	0.0419104214124166	0.00327106947321477	0.173048118727183
citations	PLoS Genet	any_affil_nature_indexTRUE	0.100583534219448	0.0479204215046349	2.09897014803427	0.035922854438123	0.00666123394638513	0.194505834492511
citations	PLoS Genet	last_author_pub_age	-0.00322115980589559	0.00264210043693771	-1.21916629695919	0.222899850507605	-0.00839958150583104	0.00195726189403985
citations	PLoS Negl Trop Dis	(Intercept)	1.60619630047881	0.190641462187962	8.42522021203966	5.62936044991663e-17	1.23254590063035	1.97984670032727
citations	PLoS Negl Trop Dis	preprintTRUE	0.919019774868642	0.134241329129576	6.84602708292289	9.26112774113568e-12	0.655911604537885	1.1821279451994
citations	PLoS Negl Trop Dis	ns(pub_date, df = 3)1	-0.939428573156108	0.0774094372852301	-12.1358403587744	4.39931818764144e-33	-1.09114828229867	-0.787708864013545
citations	PLoS Negl Trop Dis	ns(pub_date, df = 3)2	-2.81647129257067	0.155419402545071	-18.1217482917161	1.48591373971638e-69	-3.12108772405774	-2.5118548610836
citations	PLoS Negl Trop Dis	ns(pub_date, df = 3)3	-2.95522140884706	0.0650166747202628	-45.4532844314484	0	-3.08265174969334	-2.82779106800079
citations	PLoS Negl Trop Dis	log2(authors)	0.248623631506292	0.0250617448349493	9.92044381361584	7.91450334968026e-23	0.199503514240058	0.297743748772525
citations	PLoS Negl Trop Dis	log2(references + 1)	0.269225825739147	0.030108775003885	8.94177281222528	6.73196396829518e-19	0.210213711112912	0.328237940365381
citations	PLoS Negl Trop Dis	any_affil_usaTRUE	0.154934806332385	0.0389315659487601	3.97967054642247	7.07314383743027e-05	0.078630339211069	0.231239273453701
citations	PLoS Negl Trop Dis	any_affil_nature_indexTRUE	0.103779113675358	0.0388919936069585	2.66839274746742	0.00766467124450166	0.0275522069187568	0.180006020431958
citations	PLoS Negl Trop Dis	last_author_pub_age	0.00138262441283176	0.00233236283453881	0.592799881886795	0.553362102703851	-0.00318872274174406	0.00595397156740757
citations	PLoS Pathog	(Intercept)	3.64454349804039	0.299647305346344	12.1627774821064	5.78188864728442e-33	3.05724557149708	4.2318414245837
citations	PLoS Pathog	preprintTRUE	0.441161397724001	0.110722154410083	3.98440041267682	6.99039614245479e-05	0.224149962789556	0.658172832658446
citations	PLoS Pathog	ns(pub_date, df = 3)1	-0.820183452298857	0.0885434574616114	-9.26306105286722	4.66378455221598e-20	-0.99372543999027	-0.646641464607445
citations	PLoS Pathog	ns(pub_date, df = 3)2	-2.83019138150177	0.172586140600429	-16.3987176007037	4.89436329844422e-57	-3.16845400130938	-2.49192876169417
citations	PLoS Pathog	ns(pub_date, df = 3)3	-2.98376103006507	0.0793322566655199	-37.6109435868587	2.50035759674495e-238	-3.13924939594178	-2.82827266418836
citations	PLoS Pathog	log2(authors)	0.161082699622861	0.0263130458347654	6.12178083200217	1.09680426649235e-09	0.109510077463169	0.212655321782553
citations	PLoS Pathog	log2(references + 1)	0.0747991121694199	0.047722683739249	1.56737019607098	0.117175343606308	-0.0187356292051033	0.168333853543943
citations	PLoS Pathog	any_affil_usaTRUE	0.14355484145967	0.0426994387727282	3.36198426924893	0.000787395693787002	0.0598654793050497	0.22724420361429
citations	PLoS Pathog	any_affil_nature_indexTRUE	0.0821132816179105	0.0462720461264771	1.77457641258109	0.0761093300480174	-0.0085782622809608	0.172804825516782
citations	PLoS Pathog	last_author_pub_age	-0.000717107985120895	0.00258279187718111	-0.277648381759491	0.781308982952744	-0.00577928704395847	0.00434507107371668
citations	Syst Biol	(Intercept)	2.69008106417779	0.545556025158588	4.93089790988158	1.52118855222685e-06	1.62081090331813	3.75935122503745
citations	Syst Biol	preprintTRUE	0.810765356336725	0.230970442346329	3.5102558929208	0.000533791425833869	0.358071607844635	1.26345910482882
citations	Syst Biol	ns(pub_date, df = 3)1	-2.72116433676661	0.407774519957693	-6.67320836291814	1.6920364846366e-10	-3.5203877096968	-1.92194096383642
citations	Syst Biol	ns(pub_date, df = 3)2	-2.44625914919224	0.7744238651845	-3.15881167816211	0.0017856775397999	-3.96410203372216	-0.928416264662314
citations	Syst Biol	ns(pub_date, df = 3)3	-1.77464256881759	0.41984710875382	-4.22687814639249	3.36017350803948e-05	-2.59752778098835	-0.951757356646836
citations	Syst Biol	log2(authors)	0.165864572817335	0.0989049492842664	1.67700983638965	0.0948317256891557	-0.027985565672588	0.359714711307257
citations	Syst Biol	log2(references + 1)	0.226777524391998	0.067538771214125	3.35773838219565	0.000912593507860685	0.0944039652522224	0.359151083531773
citations	Syst Biol	any_affil_usaTRUE	0.402565594113041	0.182661452493936	2.20388915458999	0.0284743182728134	0.0445557258611513	0.76057546236493
citations	Syst Biol	any_affil_nature_indexTRUE	0.168481629265512	0.187050539650892	0.90072784382212	0.368628531779968	-0.198130691739018	0.535093950270041
citations	Syst Biol	last_author_pub_age	0.0177259858156608	0.0166869936980782	1.06226358901917	0.289174940358239	-0.0149799208428193	0.0504318924741409
citations	eNeuro	(Intercept)	2.15479705496134	0.434496227198194	4.95929980533165	8.89309944443142e-07	1.30320009823435	3.00639401168833
citations	eNeuro	preprintTRUE	0.192044783638532	0.152220423746968	1.26162297352268	0.207505929606528	-0.10630176461695	0.490391331894015
citations	eNeuro	ns(pub_date, df = 3)1	-1.35860176236921	0.169539391218456	-8.0134873235366	4.68680505424349e-15	-1.69089286311823	-1.02631066162019
citations	eNeuro	ns(pub_date, df = 3)2	-3.11155660289435	0.428523688890683	-7.26110757365414	1.02734739834806e-12	-3.95144759964233	-2.27166560614636
citations	eNeuro	ns(pub_date, df = 3)3	-1.93440839417406	0.154913239057976	-12.4870437538919	1.93288631834276e-32	-2.23803276345613	-1.63078402489198
citations	eNeuro	log2(authors)	0.235198469328941	0.0513469183495777	4.58057614534282	5.49147384012741e-06	0.13456035864665	0.335836580011233
citations	eNeuro	log2(references + 1)	0.157595219480325	0.0650522796494629	2.42259334076429	0.0156636901679085	0.0300950942551498	0.2850953447055
citations	eNeuro	any_affil_usaTRUE	0.0380468532213024	0.0861385548797307	0.441693655929388	0.658847702926293	-0.130781612023297	0.206875318465902
citations	eNeuro	any_affil_nature_indexTRUE	0.0684971404099325	0.0864615730487313	0.792226396012091	0.428497840502377	-0.10096442881226	0.237958709632125
citations	eNeuro	last_author_pub_age	0.00341071816938049	0.00496458678432327	0.687009476831093	0.49230493979983	-0.00631969312601664	0.0131411294647776
score	Am J Hum Genet	(Intercept)	1.10438997927152	0.685553377656065	1.61094674064253	0.107645362934782	-0.239269950414158	2.44804990895719
score	Am J Hum Genet	preprintTRUE	0.600984618473684	0.255135984539032	2.35554627685905	0.0187723950154644	0.100927277617014	1.10104195933035
score	Am J Hum Genet	ns(pub_date, df = 3)1	0.590764522084164	0.305883003083266	1.93134144796973	0.0538471407791271	-0.00875514744199124	1.19028419161032
score	Am J Hum Genet	ns(pub_date, df = 3)2	0.293845715041023	0.555668316219783	0.528814953928016	0.597102659086308	-0.795244172099765	1.38293560218181
score	Am J Hum Genet	ns(pub_date, df = 3)3	0.0544432824960324	0.251597855250259	0.21639008981964	0.828747188133329	-0.438679452381997	0.547566017374062
score	Am J Hum Genet	log2(authors)	0.0349083414993078	0.0611162406422073	0.57117946281532	0.568062646212579	-0.0848772890299015	0.154693972028517
score	Am J Hum Genet	log2(references + 1)	0.444505174925767	0.118046729187048	3.7655018312404	0.000180278397389848	0.213137837226401	0.675872512625134
score	Am J Hum Genet	any_affil_usaTRUE	0.0549194494378301	0.164131974512275	0.334605427132802	0.738023703677213	-0.266773309317676	0.376612208193336
score	Am J Hum Genet	any_affil_nature_indexTRUE	0.0610792805630066	0.238162173387224	0.256460879972315	0.797670879321689	-0.405710001755736	0.527868562881749
score	Am J Hum Genet	last_author_pub_age	-0.0163872061212356	0.0089049488589565	-1.84023584871614	0.0661598229055904	-0.0338405851689614	0.00106617292649019
score	BMC Bioinformatics	(Intercept)	1.53243677295664	0.244787402912282	6.26027628352177	4.64512064450874e-10	1.05266227937948	2.01221126653381
score	BMC Bioinformatics	preprintTRUE	0.7106187903595	0.115053775930631	6.17640563824653	7.85033122642317e-10	0.485117533250123	0.936120047468878
score	BMC Bioinformatics	ns(pub_date, df = 3)1	-0.42668380857365	0.117881996696592	-3.61958416493285	0.000302052313698988	-0.657728276524639	-0.19563934062266
score	BMC Bioinformatics	ns(pub_date, df = 3)2	-0.72275776613207	0.253727073232556	-2.84856384036566	0.00443442418467707	-1.22005369157064	-0.225461840693504
score	BMC Bioinformatics	ns(pub_date, df = 3)3	-0.698656761250692	0.0948396853941673	-7.36671318917786	2.49917741825962e-13	-0.884539128928369	-0.512774393573015
score	BMC Bioinformatics	log2(authors)	0.0798594349147504	0.0367556906439192	2.17270940950098	0.0299135773408354	0.00781960502577297	0.151899264803728
score	BMC Bioinformatics	log2(references + 1)	-0.0119404723820238	0.0413573177344544	-0.288714864409021	0.772828054918286	-0.0929993256387341	0.0691183808746865
score	BMC Bioinformatics	any_affil_usaTRUE	0.167008429918702	0.0614659130576455	2.71709019862886	0.00663986992633792	0.0465374540488469	0.287479405788558
score	BMC Bioinformatics	any_affil_nature_indexTRUE	0.430587400207103	0.0614589731835263	7.00609492646909	3.28692350888184e-12	0.310130026240579	0.551044774173628
score	BMC Bioinformatics	last_author_pub_age	0.00268102081624264	0.00480028803089619	0.558512489039559	0.576553965867721	-0.0067273708397326	0.0120894124722179
score	BMC Genomics	(Intercept)	1.00851079871773	0.198600064021314	5.07809906148616	3.98271828821705e-07	0.619261825908601	1.39775977152685
score	BMC Genomics	preprintTRUE	0.927756132016397	0.098603300761272	9.40897642222528	8.13419210943587e-21	0.734497213767533	1.12101505026526
score	BMC Genomics	ns(pub_date, df = 3)1	-0.112365535200376	0.0838386676076818	-1.34025907623179	0.180235851175099	-0.276686304223257	0.0519552338225054
score	BMC Genomics	ns(pub_date, df = 3)2	0.24127621254622	0.18531788939631	1.30195856067754	0.193004140461279	-0.121940176361525	0.604492601453964
score	BMC Genomics	ns(pub_date, df = 3)3	-0.479015711659289	0.0700618328864462	-6.83704225145895	9.28720240321608e-12	-0.616334380807588	-0.341697042510991
score	BMC Genomics	log2(authors)	0.0150317176304262	0.0250180741911118	0.600834321442956	0.547983758058699	-0.0340028067467039	0.0640662420075562
score	BMC Genomics	log2(references + 1)	0.0119739700105894	0.0310753433402447	0.385320602237155	0.700020010660643	-0.0489325837435067	0.0728805237646856
score	BMC Genomics	any_affil_usaTRUE	0.278617088134927	0.0419901755245346	6.63529229526875	3.66391576057102e-11	0.196317856402324	0.36091631986753
score	BMC Genomics	any_affil_nature_indexTRUE	0.323747864045039	0.0414961670304604	7.80187393711305	7.69541638401586e-15	0.242416871168878	0.405078856921199
score	BMC Genomics	last_author_pub_age	0.00244114230989333	0.00275879245644111	0.884858991184295	0.376284894944529	-0.00296599154555204	0.0078482761653387
score	Bioinformatics	(Intercept)	2.72830377469499	0.15869188857068	17.1924589168893	7.63584186649995e-63	2.41727338845782	3.03933416093217
score	Bioinformatics	preprintTRUE	0.760387485163282	0.0854164586395814	8.90211906784582	1.00240937120944e-18	0.592974302542747	0.927800667783816
score	Bioinformatics	ns(pub_date, df = 3)1	-1.9488131380757	0.115563711688978	-16.8635388184887	1.2014718256875e-60	-2.17531385090587	-1.72231242524554
score	Bioinformatics	ns(pub_date, df = 3)2	0.367622586021819	0.23924610874542	1.53658752466065	0.124515467733755	-0.101291170560558	0.836536342604196
score	Bioinformatics	ns(pub_date, df = 3)3	-0.0446014566572308	0.142855805488622	-0.312213119408601	0.754903483189272	-0.324593690397388	0.235390777082927
score	Bioinformatics	log2(authors)	0.086404843686619	0.034824741676549	2.48113380105283	0.0131590162821007	0.018149604229672	0.154660083143566
score	Bioinformatics	log2(references + 1)	-0.0736206530311065	0.0245185022592527	-3.00265702417952	0.00270171380038467	-0.121676034414106	-0.0255652716481073
score	Bioinformatics	any_affil_usaTRUE	0.027456724545785	0.0555586958747988	0.494193107189891	0.621211364240412	-0.0814363183968347	0.136349767488405
score	Bioinformatics	any_affil_nature_indexTRUE	0.0722303357540827	0.0553587275452701	1.30476871411135	0.19208655607137	-0.0362707764646121	0.180731447972778
score	Bioinformatics	last_author_pub_age	-0.0126558497613814	0.00420226876649271	-3.01167071042537	0.00262304842865768	-0.0208921451970647	-0.00441955432569819
score	Biophys J	(Intercept)	0.828616670296677	0.341781534240305	2.42440444343632	0.0154273540094718	0.158737172604836	1.49849616798852
score	Biophys J	preprintTRUE	0.806850031451121	0.145851948523062	5.53197978924183	3.61067230901671e-08	0.520985465270929	1.09271459763131
score	Biophys J	ns(pub_date, df = 3)1	0.932453029838944	0.134653860007259	6.92481470481929	5.97279031975798e-12	0.668536313845418	1.19636974583247
score	Biophys J	ns(pub_date, df = 3)2	0.974926328947215	0.255642532114113	3.81363117038769	0.00014136246055749	0.473876173086931	1.4759764848075
score	Biophys J	ns(pub_date, df = 3)3	-0.105545579746741	0.122227593455428	-0.863516794881746	0.38796365633389	-0.345107260836384	0.134016101342903
score	Biophys J	log2(authors)	0.128903670448554	0.0418560236139198	3.07969222393322	0.00210216736491377	0.0468673716292131	0.210939969267895
score	Biophys J	log2(references + 1)	-0.0963925393486218	0.0563945834896118	-1.70925172922641	0.0875695405304894	-0.206923891911398	0.0141388132141544
score	Biophys J	any_affil_usaTRUE	0.219189165278034	0.0637511727462601	3.43819816696459	0.000598376257669262	0.0942391627231732	0.344139167832896
score	Biophys J	any_affil_nature_indexTRUE	0.117491174709852	0.0645289713133251	1.82075077780746	0.0688038186378945	-0.00898328502368378	0.243965634443387
score	Biophys J	last_author_pub_age	-0.00663029509477161	0.00397550900522872	-1.66778520336672	0.09552508983794	-0.0144221495652346	0.00116155937569133
score	Cell	(Intercept)	3.11460730913712	0.652366336032878	4.77432255023679	1.98162582041741e-06	1.83599278578632	4.39322183248791
score	Cell	preprintTRUE	0.0449582877999993	0.205896469224772	0.21835385506742	0.827183519775085	-0.358591376424514	0.448507952024512
score	Cell	ns(pub_date, df = 3)1	1.05186087299671	0.188210876104517	5.5887358624939	2.71877670413581e-08	0.682974334333126	1.42074741166029
score	Cell	ns(pub_date, df = 3)2	1.3373282821041	0.373126267259017	3.58411722639658	0.000349194935485972	0.606014236590556	2.06864232761764
score	Cell	ns(pub_date, df = 3)3	0.98343289548816	0.151855769431442	6.47609833442746	1.27749894275739e-10	0.685801056557916	1.2810647344184
score	Cell	log2(authors)	0.353112470310385	0.0416885050824596	8.4702598381	5.82030257157774e-17	0.271404501779449	0.434820438841321
score	Cell	log2(references + 1)	0.206354412588911	0.105250580965549	1.96060117384488	0.0501128990266653	6.70645445179086e-05	0.412641760633304
score	Cell	any_affil_usaTRUE	0.266390826349051	0.10954769890773	2.43173365579708	0.0151447205579936	0.0516812819006635	0.481100370797439
score	Cell	any_affil_nature_indexTRUE	-0.057757230082741	0.152029824709263	-0.379907233289218	0.704068786411464	-0.355730211088835	0.240215750923352
score	Cell	last_author_pub_age	-0.0190201223163541	0.00506410972784539	-3.75586694177864	0.000179439960127465	-0.02894559499669	-0.00909464963601823
score	Cell Rep	(Intercept)	1.6306806720081	0.46791101028962	3.48502308376708	0.000498835886814157	0.713591943870696	2.54776940014551
score	Cell Rep	preprintTRUE	0.742097352476028	0.220713580061502	3.36226412651746	0.000782323425632664	0.309506684656587	1.17468802029547
score	Cell Rep	ns(pub_date, df = 3)1	0.605448566909988	0.140842004928719	4.29877838799874	1.76968965434541e-05	0.329403309739287	0.88149382408069
score	Cell Rep	ns(pub_date, df = 3)2	0.40819238088067	0.344924228151388	1.1834262355775	0.236729908120926	-0.267846683691326	1.08423144545267
score	Cell Rep	ns(pub_date, df = 3)3	0.221494407071093	0.113047928626227	1.95929646622209	0.0501664926821035	-7.54615631662625e-05	0.443064275705352
score	Cell Rep	log2(authors)	0.222621836591088	0.0387111028380532	5.75085234648107	9.73231166907144e-09	0.146749469226678	0.298494203955499
score	Cell Rep	log2(references + 1)	0.15296087546868	0.0793688606283339	1.92721521082381	0.0540429900194311	-0.00259923285683369	0.308520983794193
score	Cell Rep	any_affil_usaTRUE	0.264139503374028	0.0696822418752893	3.79062866327923	0.000153092560719893	0.127564818936452	0.400714187811604
score	Cell Rep	any_affil_nature_indexTRUE	-0.0304265126928073	0.0822016588279941	-0.370144752875053	0.711299618374646	-0.191538803465125	0.13068577807951
score	Cell Rep	last_author_pub_age	-0.0121336748573395	0.00408340693018835	-2.97145865322314	0.00298639274038994	-0.0201370053747299	-0.00413034433994908
score	Development	(Intercept)	2.3974112948435	0.230569923519751	10.397762458546	1.90281644807216e-24	1.94550254882663	2.84932004086037
score	Development	preprintTRUE	0.908220052878322	0.186571947895755	4.86793466607199	1.25501645933815e-06	0.542545754477159	1.27389435127949
score	Development	ns(pub_date, df = 3)1	0.498337486676836	0.197171448928112	2.52743228994846	0.0115988356131354	0.111888547998157	0.884786425355515
score	Development	ns(pub_date, df = 3)2	0.030903050528346	0.413169324881892	0.0747951231306434	0.940388362021204	-0.778893945756892	0.840700046813584
score	Development	ns(pub_date, df = 3)3	-0.329045255362837	0.162049896216807	-2.030518149315	0.0424917853097149	-0.646657215646232	-0.0114332950794427
score	Development	log2(authors)	0.0498158974950138	0.0538553115232529	0.924995067079038	0.355127201788916	-0.0557385734667468	0.155370368456774
score	Development	log2(references + 1)	-0.0115741617048804	0.0305978025689542	-0.378267742554297	0.705288808960388	-0.0715447527460978	0.048396429336337
score	Development	any_affil_usaTRUE	-0.123367732097538	0.0913057633046205	-1.35114945248253	0.176864936115452	-0.302323739755533	0.0555882755604572
score	Development	any_affil_nature_indexTRUE	0.160278865829169	0.0987857926017359	1.62248904025449	0.104922864459009	-0.0333377298544764	0.353895461512815
score	Development	last_author_pub_age	-0.016720048663619	0.00569222512209861	-2.93734845424643	0.0033642267908118	-0.0278766048948264	-0.00556349243241166
score	Elife	(Intercept)	2.54937251932833	0.337631720645099	7.55074942146239	5.22454627983489e-14	1.88762650682565	3.21111853183101
score	Elife	preprintTRUE	0.687158218574699	0.0905287712145147	7.59049536800214	3.86243676932911e-14	0.509725087429584	0.864591349719814
score	Elife	ns(pub_date, df = 3)1	0.382899292240919	0.134201421822712	2.85316867020046	0.00434864868238023	0.119869338794335	0.645929245687502
score	Elife	ns(pub_date, df = 3)2	0.180934586275582	0.314706264990805	0.574931631185888	0.565366752576016	-0.435878358815515	0.797747531366678
score	Elife	ns(pub_date, df = 3)3	0.0767203181784365	0.116044277358895	0.661129699150612	0.508563544698297	-0.150722286056975	0.304162922413848
score	Elife	log2(authors)	0.185086129790449	0.0358273070561055	5.16606312332111	2.49586444232256e-07	0.114865898297424	0.255306361283473
score	Elife	log2(references + 1)	0.0587307333151909	0.0544464856382141	1.07868731336389	0.280785911725692	-0.0479824176204859	0.165443884250868
score	Elife	any_affil_usaTRUE	0.0185905055014711	0.0685717020946555	0.271110457135934	0.786318719003603	-0.115807560962663	0.152988571965606
score	Elife	any_affil_nature_indexTRUE	0.0202591874530967	0.0804918680379603	0.25169235038181	0.801290553023093	-0.137501974949656	0.17802034985585
score	Elife	last_author_pub_age	-0.0236449961152111	0.00382420165430765	-6.18298883077384	6.85693591498946e-10	-0.0311402936272726	-0.0161496986031496
score	Evolution	(Intercept)	1.54793194356831	0.545809155622643	2.83603147294675	0.00468474098247021	0.478165656115711	2.61769823102091
score	Evolution	preprintTRUE	0.176524877795923	0.197889522480284	0.892037514586004	0.372644788179851	-0.211331459183262	0.564381214775108
score	Evolution	ns(pub_date, df = 3)1	0.673882244191618	0.212880703291019	3.16553935501795	0.0016074123883646	0.256643732737664	1.09112075564557
score	Evolution	ns(pub_date, df = 3)2	0.296983621436731	0.41742068870415	0.711473171966377	0.47700135966103	-0.521145894825308	1.11511313769877
score	Evolution	ns(pub_date, df = 3)3	0.508570469781733	0.201070234679794	2.52931753221274	0.0116221595150112	0.114480051446321	0.902660888117146
score	Evolution	log2(authors)	0.0300167636210757	0.063711628785408	0.471134770736712	0.637674730462587	-0.0948557341947093	0.154889261436861
score	Evolution	log2(references + 1)	0.240525135151325	0.0839158246347712	2.86626671665527	0.00426397897310794	0.0760531411341943	0.404997129168455
score	Evolution	any_affil_usaTRUE	0.110265665414646	0.101303042662346	1.08847338161573	0.276718544220962	-0.0882846497278758	0.308815980557168
score	Evolution	any_affil_nature_indexTRUE	0.0539225430744454	0.102499849454088	0.526074363636978	0.598984373839415	-0.146973470276344	0.254818556425235
score	Evolution	last_author_pub_age	-0.0219853253594814	0.00704647650272249	-3.12004522416092	0.00187403766091509	-0.0357961655227253	-0.00817448519623759
score	G3 (Bethesda)	(Intercept)	0.596444399251767	0.293169398564723	2.03447018062525	0.0421162933892054	0.0218429366956417	1.17104586180789
score	G3 (Bethesda)	preprintTRUE	0.692795027177394	0.101908477162694	6.79820802416042	1.64089493149335e-11	0.493058082219192	0.892531972135596
score	G3 (Bethesda)	ns(pub_date, df = 3)1	-0.961240991519088	0.163115699633566	-5.89300106414333	4.87907389421278e-09	-1.28094188811393	-0.641540094924246
score	G3 (Bethesda)	ns(pub_date, df = 3)2	0.847111361748753	0.357711658127609	2.36814021154032	0.0180301898078926	0.146009394968535	1.54821332852897
score	G3 (Bethesda)	ns(pub_date, df = 3)3	-0.45147342149098	0.147197339032944	-3.06713031945459	0.0022079779638335	-0.739974904615683	-0.162971938366277
score	G3 (Bethesda)	log2(authors)	0.128436211178444	0.0419014417989988	3.06519789449137	0.00222218574285013	0.0463108943521047	0.210561528004783
score	G3 (Bethesda)	log2(references + 1)	0.13670192023003	0.0409087953825962	3.3416266343591	0.000857663653444465	0.0565221546292229	0.216881685830837
score	G3 (Bethesda)	any_affil_usaTRUE	0.228607106802221	0.0794977122834748	2.87564384226615	0.00410086455689282	0.0727944538732826	0.384419759731159
score	G3 (Bethesda)	any_affil_nature_indexTRUE	0.397370428230399	0.0794155742182097	5.00368387614433	6.43315010927271e-07	0.24171876295114	0.553022093509657
score	G3 (Bethesda)	last_author_pub_age	-0.00557747081627739	0.00460850793380537	-1.2102552271559	0.226411248404746	-0.014609980389003	0.00345503875644823
score	Genetics	(Intercept)	1.78232206876057	0.46123270647017	3.86425776784294	0.000117424949063299	0.878322575587107	2.68632156193404
score	Genetics	preprintTRUE	0.778365299296215	0.117392981304473	6.63042449937811	5.0600474065903e-11	0.548279283901664	1.00845131469077
score	Genetics	ns(pub_date, df = 3)1	-0.337167740705095	0.196771575684278	-1.71349819979123	0.0868807114362489	-0.722832942227478	0.0484974608172873
score	Genetics	ns(pub_date, df = 3)2	-0.608674078561606	0.426235719430729	-1.42802222060258	0.153547184403933	-1.44408073757035	0.226732580447142
score	Genetics	ns(pub_date, df = 3)3	0.0952206912189962	0.173985319897796	0.547291525945589	0.584280827825268	-0.245784269619364	0.436225652057357
score	Genetics	log2(authors)	-0.00872415161617199	0.0536270196381724	-0.162682015055747	0.870796358786179	-0.113831178705212	0.0963828754728681
score	Genetics	log2(references + 1)	0.111181019980573	0.0740962694021467	1.50049416627381	0.133751037369067	-0.0340449994364113	0.256407039397558
score	Genetics	any_affil_usaTRUE	0.256979924180813	0.0994866106398466	2.58306039906326	0.00991098979635898	0.0619897503827546	0.451970097978872
score	Genetics	any_affil_nature_indexTRUE	0.500653922381576	0.100450395386676	4.9840911074003	7.14437858587935e-07	0.303774765190882	0.697533079572269
score	Genetics	last_author_pub_age	-0.0147263687217324	0.00560540600439402	-2.62717253847241	0.00872014575042663	-0.0257127626090692	-0.0037399748343955
score	Genome Biol	(Intercept)	2.79963468261244	0.576416689152935	4.85696326164082	1.4694178474341e-06	1.66987873178487	3.92939063344001
score	Genome Biol	preprintTRUE	0.537413945801058	0.143875714231893	3.7352651812722	0.000202670410924884	0.255422727656572	0.819405163945545
score	Genome Biol	ns(pub_date, df = 3)1	0.494545658667023	0.250521825372449	1.97406217175604	0.0487646368637415	0.00353190359579147	0.985559413738255
score	Genome Biol	ns(pub_date, df = 3)2	0.34299333077896	0.489431175918926	0.700799923778815	0.483659110928733	-0.616274146933224	1.30226080849114
score	Genome Biol	ns(pub_date, df = 3)3	-0.362871972680527	0.190112349191316	-1.90872383737343	0.0567035219294598	-0.73548533011181	0.00974138475075531
score	Genome Biol	log2(authors)	0.195153881707246	0.0549042979082951	3.55443725067216	0.000404067572278929	0.0875434352105297	0.302764328203962
score	Genome Biol	log2(references + 1)	0.105453700865798	0.0952968841155623	1.10658078534781	0.26885265720783	-0.0813247598395915	0.292232161571187
score	Genome Biol	any_affil_usaTRUE	0.00452127845040804	0.117711171014782	0.038409935195023	0.969371713384789	-0.226188377316599	0.235230934217416
score	Genome Biol	any_affil_nature_indexTRUE	0.12226643976213	0.136549704773183	0.895398785118	0.370879555893604	-0.145366063692886	0.389898943217145
score	Genome Biol	last_author_pub_age	-0.00920936656888881	0.00819094192197438	-1.12433547406584	0.261253402504438	-0.0252633177354179	0.00684458459764028
score	Genome Biol Evol	(Intercept)	-0.17453469608786	0.449721038791673	-0.388095465928849	0.698031879155724	-1.05597173520948	0.706902343033759
score	Genome Biol Evol	preprintTRUE	0.518441102509867	0.145684554901626	3.55865522505076	0.000391105100884652	0.232904621798931	0.803977583220802
score	Genome Biol Evol	ns(pub_date, df = 3)1	0.491569338398995	0.183521289771959	2.678541214536	0.00752140201192687	0.131874220049617	0.851264456748373
score	Genome Biol Evol	ns(pub_date, df = 3)2	0.934994024632091	0.390834880954493	2.39229933200603	0.0169356468758897	0.168971734059285	1.7010163152049
score	Genome Biol Evol	ns(pub_date, df = 3)3	0.656920727428864	0.159947675952921	4.10709767125484	4.34987427674874e-05	0.343429043150256	0.970412411707471
score	Genome Biol Evol	log2(authors)	0.00314524385903753	0.0511034481334305	0.0615466073996678	0.950936775240883	-0.0970156739682968	0.103306161686372
score	Genome Biol Evol	log2(references + 1)	0.353162235098385	0.0678455689325908	5.20538394260171	2.37032694536929e-07	0.220187363479878	0.486137106716893
score	Genome Biol Evol	any_affil_usaTRUE	0.185357788550951	0.106675642950005	1.73758304543636	0.0826066791940753	-0.0237226296587125	0.394438206760615
score	Genome Biol Evol	any_affil_nature_indexTRUE	0.29294535034328	0.0889217412701948	3.29441760989751	0.00102252066272286	0.118661940011109	0.46722876067545
score	Genome Biol Evol	last_author_pub_age	-0.00780606610880293	0.00564504174643215	-1.38281813659511	0.167043874962477	-0.018870144623035	0.00325801240542917
score	Genome Res	(Intercept)	3.2881696220506	0.784838542698358	4.18961282246094	3.19012576041313e-05	1.74991434468292	4.82642489941828
score	Genome Res	preprintTRUE	0.585700820289954	0.150414110305725	3.89392204693752	0.000109080108479367	0.290894581324098	0.880507059255809
score	Genome Res	ns(pub_date, df = 3)1	0.152573041970656	0.270394539308794	0.564260810742246	0.572775889446076	-0.37739051669088	0.682536600632193
score	Genome Res	ns(pub_date, df = 3)2	0.401536207914415	0.545466675503442	0.736133344065088	0.461921391178091	-0.667558830839127	1.47063124666796
score	Genome Res	ns(pub_date, df = 3)3	-0.30982739287207	0.220322055202104	-1.40624774304988	0.160139725503319	-0.741650686068038	0.121995900323899
score	Genome Res	log2(authors)	0.325455328470216	0.0647180408286554	5.02881923344802	6.42948039030102e-07	0.198610299296059	0.452300357644374
score	Genome Res	log2(references + 1)	-0.147676235736637	0.125291030045008	-1.17866566891172	0.23897280285886	-0.393242142210778	0.0978896707375034
score	Genome Res	any_affil_usaTRUE	0.179213826797323	0.132922881619389	1.34825415018073	0.178057365114341	-0.0813102338979599	0.439737887492606
score	Genome Res	any_affil_nature_indexTRUE	0.147190194622426	0.155434506696529	0.946959576420188	0.344019588247066	-0.15745584045752	0.451836229702372
score	Genome Res	last_author_pub_age	-0.017582664423304	0.00804426831467156	-2.18573818469428	0.0291992840497452	-0.0333491406020369	-0.00181618824457099
score	Gigascience	(Intercept)	3.56424615053276	0.486731719067537	7.32281462437051	1.69197983550121e-12	2.61026951102712	4.5182227900384
score	Gigascience	preprintTRUE	0.343179753188889	0.168587443497728	2.03561870367596	0.0425436139260098	0.0127544356876609	0.673605070690117
score	Gigascience	ns(pub_date, df = 3)1	-0.643384803930115	0.27613628696631	-2.32995384633607	0.0203782900305618	-1.1846019812087	-0.102167626651529
score	Gigascience	ns(pub_date, df = 3)2	-0.800782603030419	0.755806542288227	-1.05950737156366	0.290101489405576	-2.28213620519509	0.680570999134256
score	Gigascience	ns(pub_date, df = 3)3	-0.462701269243051	0.2670344286702	-1.73274012473691	0.0840252456997247	-0.986079132068873	0.0606765935827702
score	Gigascience	log2(authors)	0.00993135951050874	0.064294907022141	0.15446572629911	0.877331820134223	-0.116084342642239	0.135947061663257
score	Gigascience	log2(references + 1)	0.101029938629547	0.0847638487837551	1.19189890595092	0.234110732139355	-0.0651041521776126	0.267164029436706
score	Gigascience	any_affil_usaTRUE	-0.0624095511026831	0.148358447484191	-0.420667324045254	0.674256934611351	-0.353186764973975	0.228367662768609
score	Gigascience	any_affil_nature_indexTRUE	0.267751966074167	0.146796950685235	1.82396136176075	0.0690129495754088	-0.0199647703091957	0.55546870245753
score	Gigascience	last_author_pub_age	-0.0167092593672946	0.0133658836410175	-1.25014251328785	0.212085089373551	-0.042905909925242	0.0094873911906529
score	ISME J	(Intercept)	3.00115392856192	0.477388684248695	6.28660466321081	5.07459106575534e-10	2.06548930080751	3.93681855631633
score	ISME J	preprintTRUE	0.283424714477898	0.199517523462809	1.42055048378109	0.155797317665473	-0.107622445793833	0.674471874749628
score	ISME J	ns(pub_date, df = 3)1	1.08255676981161	0.195424672060486	5.53950920524785	3.99332025461493e-08	0.699531450882502	1.46558208874071
score	ISME J	ns(pub_date, df = 3)2	2.07267901590719	0.392666849100735	5.27846702784799	1.63720660708717e-07	1.30306613374692	2.84229189806745
score	ISME J	ns(pub_date, df = 3)3	1.00063534497037	0.155607024762457	6.43052809793066	2.07129819568198e-10	0.695651180694525	1.30561950924622
score	ISME J	log2(authors)	0.162294763102729	0.0580158740857625	2.79741994170104	0.00526227796300873	0.0485857393630235	0.276003786842434
score	ISME J	log2(references + 1)	-0.101840106840435	0.075062315750298	-1.35674080692122	0.175207215138346	-0.248959542307193	0.0452793286263229
score	ISME J	any_affil_usaTRUE	0.173559938241883	0.0914087456167309	1.89872355288196	0.0579236711184952	-0.00559791103889326	0.352717787522659
score	ISME J	any_affil_nature_indexTRUE	0.0523933359801073	0.095710791907135	0.547413044403005	0.584232083128853	-0.135196369089685	0.2399830410499
score	ISME J	last_author_pub_age	-0.0127349121845946	0.0064483877315484	-1.97489864362369	0.0485880002180362	-0.0253735198967794	-9.63044724097851e-05
score	J Biol Chem	(Intercept)	0.211888554375445	0.189328284577381	1.11915953207109	0.263107502482977	-0.159188064650972	0.582965173401862
score	J Biol Chem	preprintTRUE	0.632932762903884	0.163645744440335	3.86770071576563	0.000110784773050788	0.312192997577581	0.953672528230186
score	J Biol Chem	ns(pub_date, df = 3)1	0.442480881810875	0.067956801566805	6.51120817356146	7.92965152354567e-11	0.309287998235402	0.575673765386347
score	J Biol Chem	ns(pub_date, df = 3)2	0.6723246403368	0.127044662326319	5.29203374644664	1.24346968090324e-07	0.423321677749161	0.921327602924438
score	J Biol Chem	ns(pub_date, df = 3)3	0.897704574913167	0.0562301588370279	15.9648237436958	1.85218634324594e-56	0.787495488747626	1.00791366107871
score	J Biol Chem	log2(authors)	0.0484935528499305	0.0208532337740202	2.3254691994268	0.0200731064909592	0.00762196569165672	0.0893651400082043
score	J Biol Chem	log2(references + 1)	0.110134644696928	0.0318092738330801	3.46234388357502	0.00053844486755953	0.0477896136097185	0.172479675784137
score	J Biol Chem	any_affil_usaTRUE	0.00996074280309361	0.0318199545868947	0.313034475768737	0.754263070469698	-0.0524052221769202	0.0723267077831074
score	J Biol Chem	any_affil_nature_indexTRUE	0.0522508308192995	0.0323373027858377	1.61580670983429	0.106177672087547	-0.011129117998109	0.115630779636708
score	J Biol Chem	last_author_pub_age	0.000540515299658485	0.00179472846054295	0.301168288987274	0.763294419535499	-0.00297708784503471	0.00405811844435168
score	J Cell Biol	(Intercept)	2.09620111100537	0.65455116934003	3.20250151431083	0.00140981076870225	0.813304393060337	3.37909782895041
score	J Cell Biol	preprintTRUE	0.904020455074953	0.205069348890438	4.40836458479196	1.16604697538541e-05	0.502091916916615	1.30594899323329
score	J Cell Biol	ns(pub_date, df = 3)1	1.62323657588773	0.206626912287908	7.85588168508251	1.11871265667357e-14	1.21825526956671	2.02821788220874
score	J Cell Biol	ns(pub_date, df = 3)2	0.934014710894007	0.455215246467581	2.05180893685319	0.040474571935875	0.0418092226040254	1.82622019918399
score	J Cell Biol	ns(pub_date, df = 3)3	1.72967782513577	0.187481685742541	9.2258495451713	1.92418270846217e-19	1.36222047331953	2.09713517695201
score	J Cell Biol	log2(authors)	0.232732843964041	0.0617269007606895	3.77036334395483	0.000173551016472461	0.111750341595812	0.353715346332271
score	J Cell Biol	log2(references + 1)	0.0112452498374146	0.105295401841593	0.106797159617018	0.914973491663364	-0.19512994550978	0.217620445184609
score	J Cell Biol	any_affil_usaTRUE	0.128210299545057	0.103812092848578	1.23502278036207	0.21714150332567	-0.0752576635978847	0.331678262687998
score	J Cell Biol	any_affil_nature_indexTRUE	0.0545432491648938	0.113006609826782	0.482655388463546	0.629456781754896	-0.166945636110569	0.276032134440357
score	J Cell Biol	last_author_pub_age	-0.0126158750079819	0.00579397889927879	-2.17741127941496	0.0297067447432341	-0.0239718649777534	-0.00125988503821045
score	J Neurophysiol	(Intercept)	0.79543347098152	0.304153938739726	2.61523317527114	0.00899379040310574	0.199302705295654	1.39156423666739
score	J Neurophysiol	preprintTRUE	0.322262384646546	0.169942054182996	1.8963074572438	0.0580851009814826	-0.0108179210108811	0.655342690303973
score	J Neurophysiol	ns(pub_date, df = 3)1	0.708468004573521	0.129307199555252	5.47895250233762	4.90474577418666e-08	0.455030550503492	0.961905458643549
score	J Neurophysiol	ns(pub_date, df = 3)2	0.973946619093273	0.241333330563576	4.03569045692468	5.68048984964924e-05	0.500941982919565	1.44695125526698
score	J Neurophysiol	ns(pub_date, df = 3)3	1.07058457764013	0.120652175620477	8.87331349090424	1.72500423063942e-18	0.834110658767589	1.30705849651266
score	J Neurophysiol	log2(authors)	0.216244946882901	0.0426226594326865	5.07347382263686	4.32397658634082e-07	0.132706069469519	0.299783824296283
score	J Neurophysiol	log2(references + 1)	-0.0195602518005118	0.0494736747932703	-0.395366866970079	0.692620678500872	-0.116526872578169	0.077406368977145
score	J Neurophysiol	any_affil_usaTRUE	0.0546096904416999	0.0635082752755418	0.859883065707047	0.38997209600638	-0.0698642418186176	0.179083622702017
score	J Neurophysiol	any_affil_nature_indexTRUE	0.0966745364018912	0.0631643828227207	1.53052293209642	0.126069323747882	-0.0271253790363417	0.220474451840124
score	J Neurophysiol	last_author_pub_age	-0.0104431286562665	0.00355056866447856	-2.9412552306745	0.00331208962889304	-0.017402115363281	-0.00348414194925207
score	J Neurosci	(Intercept)	1.51581084043498	0.145847992408576	10.3930867707017	6.2837792119029e-25	1.2299540280967	1.80166765277326
score	J Neurosci	preprintTRUE	0.736815569241036	0.2124970846062	3.467414955864	0.00053202056263588	0.320328936593124	1.15330220188895
score	J Neurosci	ns(pub_date, df = 3)1	0.602844011737435	0.139595439741907	4.31850791725011	1.61584170240146e-05	0.329241977437266	0.876446046037604
score	J Neurosci	ns(pub_date, df = 3)2	2.26116506564587	0.242568868871595	9.32174469116574	2.00272073370885e-20	1.78573881888692	2.73659131240481
score	J Neurosci	ns(pub_date, df = 3)3	0.404606959585714	0.122701006539256	3.2975031827165	0.000985537358220706	0.164117405901959	0.645096513269469
score	J Neurosci	log2(authors)	0.0648796999024696	0.0393196644662341	1.65005731313362	0.0990237728447134	-0.0121854263355486	0.141944826140488
score	J Neurosci	log2(references + 1)	-0.00930691710101127	0.0140632671255343	-0.661789114715239	0.508151323748018	-0.0368704141720246	0.0182565799700021
score	J Neurosci	any_affil_usaTRUE	0.205376401718197	0.0821998563129704	2.49850073869035	0.0125189379405274	0.0442676438104078	0.366485159625986
score	J Neurosci	any_affil_nature_indexTRUE	0.165780163063665	0.0699577486139577	2.36971838499944	0.0178572777503751	0.0286654953408006	0.302894830786529
score	J Neurosci	last_author_pub_age	-0.0129280051447748	0.00388255961213761	-3.32976346438042	0.000878484447447157	-0.0205376821523943	-0.0053183281371553
score	J Virol	(Intercept)	0.545104293121477	0.285082337725749	1.91209423028469	0.0559536773573008	-0.0136468214494762	1.10385540769243
score	J Virol	preprintTRUE	0.97826562958877	0.201338055278781	4.85882129056141	1.23786219189671e-06	0.583650292525025	1.37288096665251
score	J Virol	ns(pub_date, df = 3)1	0.173243890609675	0.107649879875032	1.6093273007902	0.107643833421569	-0.0377459968854507	0.3842337781048
score	J Virol	ns(pub_date, df = 3)2	0.902079289765958	0.203913136965405	4.42384097067273	1.00207210142849e-05	0.502416885339182	1.30174169419273
score	J Virol	ns(pub_date, df = 3)3	0.287313771410719	0.0914164638492005	3.14291057992211	0.00168813468660046	0.108140794672278	0.46648674814916
score	J Virol	log2(authors)	0.24309297198119	0.031172930765666	7.79820716276487	8.44092996550339e-15	0.181995150387924	0.304190793574456
score	J Virol	log2(references + 1)	-0.0681322151166406	0.0468980788064113	-1.4527719866283	0.146385519318762	-0.160050760521328	0.0237863302880468
score	J Virol	any_affil_usaTRUE	0.147016016784259	0.0507555639078778	2.89654976646689	0.00379860744369264	0.0475369395097971	0.24649509405872
score	J Virol	any_affil_nature_indexTRUE	0.114803919093485	0.0513387325694763	2.23620477849004	0.0254073047115504	0.0141818522453784	0.215425985941592
score	J Virol	last_author_pub_age	-0.00119153479694936	0.00283283193384722	-0.420616127173897	0.674063774585561	-0.00674378336154487	0.00436071376764615
score	MBio	(Intercept)	2.57559610275144	0.475387744725769	5.41788493987617	6.89470043475751e-08	1.64385324439722	3.50733896110567
score	MBio	preprintTRUE	0.776016446769136	0.167601491201689	4.63012853409097	3.93219467200166e-06	0.447523560258619	1.10450933327965
score	MBio	ns(pub_date, df = 3)1	0.962997591867155	0.170019285258126	5.66404917186376	1.73302279557371e-08	0.629765916083987	1.29622926765032
score	MBio	ns(pub_date, df = 3)2	1.60768245619316	0.363233830130053	4.42602622012807	1.02093858459887e-05	0.895757231171717	2.3196076812146
score	MBio	ns(pub_date, df = 3)3	0.307228131585883	0.144071194151621	2.1324743880623	0.0331109770875749	0.0248537798390279	0.589602483332739
score	MBio	log2(authors)	0.251893104679184	0.0501893339556111	5.01885729151069	5.74323624139501e-07	0.153523817718133	0.350262391640235
score	MBio	log2(references + 1)	-0.0876847866217499	0.0792674187454208	-1.10618950395449	0.268801201082598	-0.24304607251023	0.06767649926673
score	MBio	any_affil_usaTRUE	0.0917573858005638	0.0932454453058961	0.984041477838938	0.325235310382257	-0.0910003287213919	0.27451510032252
score	MBio	any_affil_nature_indexTRUE	0.0175533045278167	0.0929483184765082	0.188850156899322	0.850232827988344	-0.164622052109698	0.199728661165332
score	MBio	last_author_pub_age	-0.0173542175708582	0.00456396573686828	-3.80244256232439	0.000148343072485281	-0.0262994260417948	-0.00840900909992152
score	Mol Biol Cell	(Intercept)	2.29959344089613	0.296977932996223	7.7433141839713	2.0779108011148e-14	1.71752738802038	2.88165949377187
score	Mol Biol Cell	preprintTRUE	0.687704932654936	0.147332405293971	4.66770993986535	3.39520904171677e-06	0.398938724523095	0.976471140786776
score	Mol Biol Cell	ns(pub_date, df = 3)1	0.0556044771289442	0.152973732390564	0.363490360469064	0.71630388777767	-0.244218528937229	0.355427483195117
score	Mol Biol Cell	ns(pub_date, df = 3)2	1.414266002558	0.295421962380938	4.78727441643067	1.90544047512258e-06	0.83524959604922	1.99328240906679
score	Mol Biol Cell	ns(pub_date, df = 3)3	-0.0869625199645181	0.133024260205892	-0.653734287489512	0.513410703620979	-0.34768527903815	0.173760239109114
score	Mol Biol Cell	log2(authors)	-0.128655148013778	0.0440642033190773	-2.91972027911548	0.00357017885168423	-0.21501939952662	-0.042290896500936
score	Mol Biol Cell	log2(references + 1)	-0.222953903861876	0.0482240182896872	-4.62329585482833	4.19391638890072e-06	-0.317471242899464	-0.128436564824288
score	Mol Biol Cell	any_affil_usaTRUE	0.141963343572454	0.0757557326234603	1.87396172746523	0.0611832845527288	-0.00651516399197438	0.290441851136882
score	Mol Biol Cell	any_affil_nature_indexTRUE	0.173673663488542	0.0784981672826301	2.21245501010534	0.0271266405355951	0.0198200827621869	0.327527244214898
score	Mol Biol Cell	last_author_pub_age	-0.00940210968705569	0.00411687119357129	-2.28379981908046	0.0225607904847575	-0.0174710289554458	-0.00133319041866553
score	Mol Biol Evol	(Intercept)	2.14731203735191	0.353714442875158	6.07075023540894	1.90466749551574e-09	1.45404446850495	2.84057960619887
score	Mol Biol Evol	preprintTRUE	0.2066767320096	0.142957965040496	1.44571680179593	0.148619268333997	-0.0735157307729083	0.486869194792109
score	Mol Biol Evol	ns(pub_date, df = 3)1	-0.171865649037221	0.224317768671921	-0.766170464581365	0.443784147491989	-0.611520396726572	0.267789098652131
score	Mol Biol Evol	ns(pub_date, df = 3)2	2.3697176680926	0.414178324195537	5.72149127479168	1.45534213834034e-08	1.5579430694922	3.18149226669301
score	Mol Biol Evol	ns(pub_date, df = 3)3	0.46070231669673	0.211715968542793	2.17603953007262	0.029822603611091	0.0457466434008406	0.875657989992619
score	Mol Biol Evol	log2(authors)	0.20477755275952	0.0526317640086262	3.89075982188165	0.00010761057718205	0.101621190859801	0.307933914659238
score	Mol Biol Evol	log2(references + 1)	0.0326325461790769	0.0487430072464053	0.669481593823563	0.503367179436826	-0.0629019925220523	0.128167084880206
score	Mol Biol Evol	any_affil_usaTRUE	0.0830721551944416	0.113117885480267	0.734385679521324	0.462912966987874	-0.138634826354209	0.304779136743092
score	Mol Biol Evol	any_affil_nature_indexTRUE	0.213970136338017	0.107696808376658	1.98678251995806	0.0472619747206884	0.00288827066985523	0.425052002006178
score	Mol Biol Evol	last_author_pub_age	-0.0049223919186539	0.006821171893723	-0.721634346025438	0.470714555058531	-0.0182916431627079	0.00844685932540006
score	Mol Cell	(Intercept)	0.268698604297596	0.825730121328641	0.325407293929458	0.744931067745378	-1.34970269445643	1.88709990305162
score	Mol Cell	preprintTRUE	0.671258115943849	0.251217455761286	2.67202019823693	0.00764443704237099	0.178880950363945	1.16363528152375
score	Mol Cell	ns(pub_date, df = 3)1	0.550430235139442	0.229462856277003	2.39877705729843	0.0166058228101276	0.100691301046825	1.00016916923206
score	Mol Cell	ns(pub_date, df = 3)2	1.97976097002498	0.436254881773097	4.53808324614848	6.26271678777218e-06	1.12471711366993	2.83480482638003
score	Mol Cell	ns(pub_date, df = 3)3	1.27589680351454	0.184417243436319	6.91853310319715	7.50046548608384e-12	0.914445648251201	1.63734795877788
score	Mol Cell	log2(authors)	0.27341175479957	0.0646649374843193	4.22812988670823	2.54019902617782e-05	0.14667080626777	0.40015270333137
score	Mol Cell	log2(references + 1)	0.299594140193614	0.140332454140585	2.13488848341155	0.0329775879383517	0.0245475842159491	0.574640696171278
score	Mol Cell	any_affil_usaTRUE	-0.0206796310705504	0.112642098468245	-0.183587054500589	0.854369256909466	-0.241454087211325	0.200094825070224
score	Mol Cell	any_affil_nature_indexTRUE	-0.0341405240913122	0.143124830453437	-0.238536695436781	0.811506664882504	-0.314660037073449	0.246378988890825
score	Mol Cell	last_author_pub_age	-0.00426766760717157	0.00625511201094393	-0.682268774676596	0.495204175870466	-0.0165274618678856	0.00799212665354243
score	Mol Ecol	(Intercept)	1.83870620123064	0.569934263049221	3.22617242099699	0.00128331240300315	0.721655572098791	2.95575683036249
score	Mol Ecol	preprintTRUE	0.409565928316682	0.173317780411299	2.36309239216395	0.0182579406326056	0.0698693208301144	0.749262535803249
score	Mol Ecol	ns(pub_date, df = 3)1	0.854156226299628	0.16945782133079	5.04052406428779	5.24306647396361e-07	0.522024999592657	1.1862874530066
score	Mol Ecol	ns(pub_date, df = 3)2	1.16580226635401	0.340674421298977	3.42204225931861	0.000639273361212095	0.498092670153991	1.83351186255403
score	Mol Ecol	ns(pub_date, df = 3)3	0.495733500964522	0.166193498502485	2.98286939881172	0.00290455115390404	0.170000229434941	0.821466772494104
score	Mol Ecol	log2(authors)	0.17294591614042	0.0497882328255915	3.47363034045114	0.000528978883422088	0.0753627729483657	0.270529059332474
score	Mol Ecol	log2(references + 1)	-0.0402303076288705	0.0893044576461376	-0.450484877118679	0.65242996733818	-0.215263828274183	0.134803213016442
score	Mol Ecol	any_affil_usaTRUE	0.505993808213721	0.0811548615796141	6.23491677966001	5.95687426183602e-10	0.346933202347344	0.665054414080098
score	Mol Ecol	any_affil_nature_indexTRUE	-0.0303417546153192	0.0818361812395564	-0.370762102480085	0.710870305335815	-0.190737722477142	0.130054213246504
score	Mol Ecol	last_author_pub_age	-0.00316889733529682	0.00571375856738565	-0.554608196675479	0.579250452784936	-0.0143676583437299	0.00802986367313622
score	Nat Genet	(Intercept)	3.57520507834607	0.632286138494898	5.65441002210887	2.23912615921942e-08	2.33594701897217	4.81446313771998
score	Nat Genet	preprintTRUE	0.398637659616268	0.149313915490812	2.66979576756728	0.00775736768850441	0.10598776286362	0.691287556368916
score	Nat Genet	ns(pub_date, df = 3)1	0.575933379379698	0.218046379866416	2.64133428737747	0.00843350579660126	0.148570327882183	1.00329643087721
score	Nat Genet	ns(pub_date, df = 3)2	1.24806327943274	0.443183308437225	2.81613331475348	0.00499080534422601	0.379439956346471	2.116686602519
score	Nat Genet	ns(pub_date, df = 3)3	0.724821328526019	0.187073961011686	3.87451746146938	0.000116374202269994	0.358163102497865	1.09147955455417
score	Nat Genet	log2(authors)	0.199883199238885	0.0376043508111256	5.31542746856163	1.41263610183138e-07	0.126180025987069	0.273586372490701
score	Nat Genet	log2(references + 1)	0.167687987562183	0.109276397422573	1.53453070852741	0.125329464975694	-0.0464898157463451	0.381865790870711
score	Nat Genet	any_affil_usaTRUE	0.409799748513675	0.127377915960753	3.2171962103693	0.00135125108977454	0.160143620804829	0.659455876222521
score	Nat Genet	any_affil_nature_indexTRUE	-0.0264377424626441	0.187081731486107	-0.141316537176733	0.887658608291182	-0.393111198340807	0.340235713415519
score	Nat Genet	last_author_pub_age	-0.00393290708788525	0.00692461100888415	-0.567960724846406	0.570235092316502	-0.0175048952722478	0.00963908109647726
score	Nat Methods	(Intercept)	4.05613893205046	0.667434081763848	6.07721278082051	2.32230571762654e-09	2.74799216973876	5.36428569436216
score	Nat Methods	preprintTRUE	0.819341481024567	0.17617222293914	4.65079833446625	4.16975219186432e-06	0.474050268987492	1.16463269306164
score	Nat Methods	ns(pub_date, df = 3)1	0.728218791206	0.274596918184762	2.65195544079638	0.00823970402067497	0.190018721298174	1.26641886111383
score	Nat Methods	ns(pub_date, df = 3)2	-0.459485400489676	0.54234432349105	-0.847220816347788	0.397250179146887	-1.52246074175187	0.603489940772522
score	Nat Methods	ns(pub_date, df = 3)3	0.101339649885271	0.206380242532789	0.491033679588639	0.62360360860447	-0.303158192599636	0.505837492370179
score	Nat Methods	log2(authors)	0.0834012235245998	0.0713673966153028	1.16861798916617	0.243077062108138	-0.0564763035117795	0.223278750560979
score	Nat Methods	log2(references + 1)	0.192999229614645	0.120924839306447	1.59602634761868	0.111072301927286	-0.044009100262285	0.430007559491574
score	Nat Methods	any_affil_usaTRUE	0.382823254630682	0.139983699467894	2.73477023457639	0.00644901530407829	0.108460245250932	0.657186264010432
score	Nat Methods	any_affil_nature_indexTRUE	-0.117431038336111	0.173884355335012	-0.675339872352884	0.499751087686003	-0.4582381122677	0.223376035595478
score	Nat Methods	last_author_pub_age	-0.0159840475209807	0.00941761807929864	-1.69724949412805	0.0902300063840169	-0.0344422397765593	0.00247414473459786
score	Neuroimage	(Intercept)	0.147153225419435	0.313218039232549	0.469810825008648	0.638521806883006	-0.466742850784615	0.761049301623486
score	Neuroimage	preprintTRUE	0.701828784886053	0.120145796046596	5.84147600648352	5.68638514288973e-09	0.46634735174083	0.937310218031276
score	Neuroimage	ns(pub_date, df = 3)1	0.697177994604268	0.12290866267442	5.67232593239635	1.53255953459473e-08	0.456281442374422	0.938074546834113
score	Neuroimage	ns(pub_date, df = 3)2	1.1062030498275	0.247126130286725	4.47626905557919	7.85770765655613e-06	0.621844734826764	1.59056136482823
score	Neuroimage	ns(pub_date, df = 3)3	0.411141167747408	0.101660084228111	4.04427333371931	5.37093228214874e-05	0.211891063995002	0.610391271499813
score	Neuroimage	log2(authors)	0.121747200886802	0.0363594416443847	3.34843428228511	0.0008219839830263	0.0504840047658226	0.193010397007782
score	Neuroimage	log2(references + 1)	0.186370067223645	0.0491362932855073	3.79292076715551	0.000151604168525567	0.090064702050253	0.282675432397036
score	Neuroimage	any_affil_usaTRUE	0.100584033696412	0.0588421175274425	1.70938840957758	0.0874748139033291	-0.0147443974314485	0.215912464824272
score	Neuroimage	any_affil_nature_indexTRUE	0.23692952201666	0.0618536207102268	3.83048751707896	0.000130313738136472	0.115698653111215	0.358160390922105
score	Neuroimage	last_author_pub_age	-0.00452457560981449	0.00408702259132157	-1.10705911423686	0.268350579460277	-0.0125349926928063	0.00348584147317736
score	Neuron	(Intercept)	2.20471707109172	0.748715586469449	2.94466565266526	0.00329207180354409	0.737261486947812	3.67217265523562
score	Neuron	preprintTRUE	0.630005001558665	0.259799904189186	2.4249624091466	0.0154491405052342	0.120806546160904	1.13920345695643
score	Neuron	ns(pub_date, df = 3)1	0.309484649058738	0.23497059706575	1.31712075010023	0.188036494790566	-0.151049258616004	0.77001855673348
score	Neuron	ns(pub_date, df = 3)2	0.943403899295817	0.461522954127147	2.04411046267466	0.0411491833806444	0.0388355311680771	1.84797226742356
score	Neuron	ns(pub_date, df = 3)3	0.848423351350873	0.198874674623779	4.26612062574521	2.13705364729968e-05	0.458636151651143	1.2382105510506
score	Neuron	log2(authors)	0.238941533505625	0.0578280019783841	4.13193479510048	3.83348719459425e-05	0.125600732330081	0.352282334681169
score	Neuron	log2(references + 1)	0.264873016229234	0.121922806415179	2.17246489001634	0.0300056473147247	0.025908706761435	0.503837325697034
score	Neuron	any_affil_usaTRUE	0.152980828009064	0.131196559819342	1.1660429832895	0.243816687316709	-0.104159704132401	0.410121360150529
score	Neuron	any_affil_nature_indexTRUE	0.0336383216220117	0.1600869877213	0.210125270647066	0.833603713513876	-0.280126408705242	0.347403051949266
score	Neuron	last_author_pub_age	-0.0265692492560173	0.00659854598117932	-4.02653089510922	5.99680503980351e-05	-0.0395021617294603	-0.0136363367825744
score	Nucleic Acids Res	(Intercept)	1.93402305384792	0.21144206967051	9.14682237485524	8.45302789738791e-20	1.51960421247711	2.34844189521873
score	Nucleic Acids Res	preprintTRUE	1.24299422158694	0.0981758455008921	12.6608965295404	3.6248876193484e-36	1.05057310025342	1.43541534292046
score	Nucleic Acids Res	ns(pub_date, df = 3)1	-0.241947133943978	0.0908736417587031	-2.66245667348097	0.00778290286760791	-0.420056198935032	-0.0638380689529252
score	Nucleic Acids Res	ns(pub_date, df = 3)2	1.01981100423225	0.188833754359222	5.40057580114755	6.96036313960682e-08	0.649703646622696	1.38991836184181
score	Nucleic Acids Res	ns(pub_date, df = 3)3	0.199884766741585	0.0885671831834469	2.25687167139062	0.0240604869947966	0.0262962774898672	0.373473255993302
score	Nucleic Acids Res	log2(authors)	0.210193409281046	0.0253583930128872	8.28890889001622	1.46525861377222e-16	0.160491872269975	0.259894946292118
score	Nucleic Acids Res	log2(references + 1)	-0.163128692248149	0.0341949833098497	-4.7705445787178	1.89127966465386e-06	-0.230149627987403	-0.0961077565088956
score	Nucleic Acids Res	any_affil_usaTRUE	0.0533190506681241	0.0430193498106542	1.23942018888717	0.215249998049206	-0.0309973255990882	0.137635426935336
score	Nucleic Acids Res	any_affil_nature_indexTRUE	0.114781432624918	0.0437734547457755	2.62216983538398	0.00876454319744372	0.0289870378443045	0.200575827405532
score	Nucleic Acids Res	last_author_pub_age	-0.0181460193366912	0.00257219442690305	-7.05468418207375	1.97420866769958e-12	-0.0231874277746559	-0.0131046108987266
score	PLoS Biol	(Intercept)	6.14735001757821	0.505552481122704	12.1596673878971	9.0233163531015e-32	5.15648536228284	7.13821467287357
score	PLoS Biol	preprintTRUE	0.610130161087084	0.207733739432582	2.93707783219825	0.00339129272986267	0.202979513425396	1.01728080874877
score	PLoS Biol	ns(pub_date, df = 3)1	0.831194139750304	0.280597520509331	2.96222909682719	0.00312847235765954	0.281233105400776	1.38115517409983
score	PLoS Biol	ns(pub_date, df = 3)2	0.0632253139849647	0.577871671488749	0.109410647907484	0.912899348638122	-1.06938234981895	1.19583297778888
score	PLoS Biol	ns(pub_date, df = 3)3	-0.906217693348702	0.213353865536054	-4.2474866394936	2.36924011636157e-05	-1.32438358576177	-0.488051800935635
score	PLoS Biol	log2(authors)	-0.0655127922163181	0.0593150416839104	-1.1044886820688	0.269654262974714	-0.181768137658274	0.0507425532256382
score	PLoS Biol	log2(references + 1)	-0.165936419730162	0.0822312878141382	-2.01792315481204	0.0438733318439023	-0.327106782248221	-0.00476605721210416
score	PLoS Biol	any_affil_usaTRUE	0.163885246170917	0.130355712569511	1.25721568269228	0.208977232529304	-0.0916072556443805	0.419377747986215
score	PLoS Biol	any_affil_nature_indexTRUE	0.172738460997439	0.14871729351771	1.16152235501024	0.245714391325214	-0.118742078175545	0.464219000170423
score	PLoS Biol	last_author_pub_age	-0.0184459542642926	0.00841120877502381	-2.19302061780536	0.0285419761157519	-0.0349316205297865	-0.00196028799879862
score	PLoS Comput Biol	(Intercept)	2.23122721526058	0.425311353582992	5.24610311120039	1.70325209159946e-07	1.39763228002194	3.06482215049923
score	PLoS Comput Biol	preprintTRUE	0.640864254124529	0.109433711249835	5.85618678929246	5.45193530839603e-09	0.426378121380297	0.855350386868761
score	PLoS Comput Biol	ns(pub_date, df = 3)1	1.09079371520685	0.160620926856243	6.79110584502555	1.42898548008162e-11	0.775982483405175	1.40560494700853
score	PLoS Comput Biol	ns(pub_date, df = 3)2	0.235350129516792	0.338443306210168	0.695390114675936	0.486884733438484	-0.427986561463799	0.898686820497382
score	PLoS Comput Biol	ns(pub_date, df = 3)3	-0.750839690356404	0.139864013919623	-5.36835508516075	8.78649217628619e-08	-1.02496812037207	-0.476711260340734
score	PLoS Comput Biol	log2(authors)	0.228979273042357	0.0496628742969897	4.61067298829775	4.24519738112893e-06	0.131641828051517	0.326316718033197
score	PLoS Comput Biol	log2(references + 1)	-0.023361600240925	0.0649745373954494	-0.359550081884248	0.719218332048894	-0.150709353448157	0.103986152966307
score	PLoS Comput Biol	any_affil_usaTRUE	0.122071829633185	0.0776057538431408	1.57297395602805	0.115869495071435	-0.0300326528924522	0.274176312158821
score	PLoS Comput Biol	any_affil_nature_indexTRUE	0.26843502476716	0.0815639600374976	3.29109847834451	0.00101383545399592	0.108572600657201	0.42829744887712
score	PLoS Comput Biol	last_author_pub_age	-0.0240811798103425	0.00555009162075166	-4.33887968989621	1.4972600810066e-05	-0.0349591594979133	-0.0132032001227717
score	PLoS Genet	(Intercept)	-0.11935474299624	0.469634573139914	-0.254143859550736	0.799406002727779	-1.03982159224531	0.801112106252833
score	PLoS Genet	preprintTRUE	1.04432995182539	0.114146490897563	9.14903247233932	1.18510049625323e-19	0.820606940704539	1.26805296294625
score	PLoS Genet	ns(pub_date, df = 3)1	0.554386881726502	0.155023051172239	3.57615772321851	0.000355512525124784	0.250547284655403	0.858226478797601
score	PLoS Genet	ns(pub_date, df = 3)2	1.8463122468094	0.286289543799207	6.44910820810254	1.35379246700643e-10	1.28519505181255	2.40742944180625
score	PLoS Genet	ns(pub_date, df = 3)3	-0.167667269402965	0.128938234871295	-1.3003688903476	0.193598339701638	-0.42038156598087	0.0850470271749402
score	PLoS Genet	log2(authors)	0.161099352991035	0.0378769434610063	4.25323001991659	2.18711622655568e-05	0.086861907963003	0.235336798019067
score	PLoS Genet	log2(references + 1)	0.241320787686439	0.072859885453826	3.31212142571063	0.000939523590347181	0.0985180362792268	0.384123539093652
score	PLoS Genet	any_affil_usaTRUE	0.169098952609541	0.0743412625929459	2.27463116325369	0.0230151798107925	0.0233927553621322	0.31480514985695
score	PLoS Genet	any_affil_nature_indexTRUE	0.219416216183782	0.0822526062104958	2.66758983444568	0.0076906503858173	0.0582040703766546	0.380628361990909
score	PLoS Genet	last_author_pub_age	-0.00948247562059253	0.00453501117027939	-2.09094868006871	0.0366366843851835	-0.018370934183827	-0.000594017057358093
score	PLoS Negl Trop Dis	(Intercept)	0.921505931509564	0.322674927728751	2.855833696147	0.00432345026277609	0.289074694447148	1.55393716857198
score	PLoS Negl Trop Dis	preprintTRUE	1.00497289102122	0.227213485870088	4.42303363804659	1.00969291829869e-05	0.559642641914051	1.4503031401284
score	PLoS Negl Trop Dis	ns(pub_date, df = 3)1	1.16383117427148	0.131021259986497	8.88276585335409	1.12997784056401e-18	0.907034223488891	1.42062812505408
score	PLoS Negl Trop Dis	ns(pub_date, df = 3)2	1.08342366705507	0.263058958467447	4.11855833903922	3.92090728802796e-05	0.56783758264826	1.59900975146189
score	PLoS Negl Trop Dis	ns(pub_date, df = 3)3	-0.293695826932283	0.110045582822063	-2.6688561176251	0.00765413246739493	-0.509381205921245	-0.0780104479433197
score	PLoS Negl Trop Dis	log2(authors)	0.109194183741037	0.0424188768306894	2.5741884721954	0.0100975985789921	0.0260547128882454	0.192333654593829
score	PLoS Negl Trop Dis	log2(references + 1)	0.0371786128682601	0.0509613527239999	0.729545251077119	0.465728130015983	-0.0627038030742218	0.137061028810742
score	PLoS Negl Trop Dis	any_affil_usaTRUE	0.333867947554205	0.0658945860187414	5.06669770198189	4.30606274570849e-07	0.204716932181295	0.463018962927115
score	PLoS Negl Trop Dis	any_affil_nature_indexTRUE	0.405202977408366	0.0658276068716852	6.1555173682405	8.5334058295717e-10	0.276183238751402	0.53422271606533
score	PLoS Negl Trop Dis	last_author_pub_age	-0.0100912689559449	0.00394769847248663	-2.55624106711181	0.0106323871321428	-0.0178286157838425	-0.00235392212804732
score	PLoS Pathog	(Intercept)	2.00271063661042	0.55034670610278	3.63899813408969	0.000280154618771208	0.924050913638724	3.08137035958212
score	PLoS Pathog	preprintTRUE	1.00078968484275	0.203357653764852	4.92132784930728	9.24884354966132e-07	0.602216007483076	1.39936336220243
score	PLoS Pathog	ns(pub_date, df = 3)1	1.20191090556718	0.162623188300078	7.3907719934095	2.07905289159105e-13	0.883175313447948	1.5206464976864
score	PLoS Pathog	ns(pub_date, df = 3)2	1.88930745729973	0.31698003720959	5.96033577991697	2.93410546294391e-09	1.26803800055077	2.5105769140487
score	PLoS Pathog	ns(pub_date, df = 3)3	-0.226755462634253	0.145705452258631	-1.556259282815	0.119793628077141	-0.512332901412291	0.0588219761437844
score	PLoS Pathog	log2(authors)	0.152540235730484	0.0483278102099285	3.1563655598686	0.00161961015764739	0.0578194682673373	0.247261003193631
score	PLoS Pathog	log2(references + 1)	-0.0543546519845571	0.087649784709138	-0.620134460853847	0.535234986069205	-0.226145073267157	0.117435769298043
score	PLoS Pathog	any_affil_usaTRUE	0.114895439353092	0.0784238505126775	1.46505735948936	0.143051480715123	-0.0388124831807091	0.268603361886893
score	PLoS Pathog	any_affil_nature_indexTRUE	0.096439482360254	0.0849854736417817	1.13477607675344	0.256595648088599	-0.0701289851867162	0.263007949907224
score	PLoS Pathog	last_author_pub_age	-0.00909936170062414	0.00474368024271968	-1.91820722203806	0.0552170532964181	-0.0183968041305289	0.000198080729280646
score	Syst Biol	(Intercept)	2.14054142085386	0.554836227292387	3.85796982165304	0.000146668642254634	1.0530823980427	3.22800044366501
score	Syst Biol	preprintTRUE	0.278153157134514	0.2348993741023	1.18413749801384	0.23752038083189	-0.182241156096994	0.738547470366023
score	Syst Biol	ns(pub_date, df = 3)1	-0.387842472673378	0.414710984400773	-0.935211478021934	0.350611586978047	-1.20066106609204	0.424976120745289
score	Syst Biol	ns(pub_date, df = 3)2	2.04659269717536	0.787597232675146	2.59852702913127	0.00993707531514968	0.502930486808659	3.59025490754206
score	Syst Biol	ns(pub_date, df = 3)3	0.868812875353545	0.426988934441464	2.03474330427327	0.0429669320251577	0.0319299420511422	1.70569580865595
score	Syst Biol	log2(authors)	0.204314787418609	0.100587375797885	2.03121699714236	0.043326053389707	0.00716715355535921	0.40146242128186
score	Syst Biol	log2(references + 1)	-0.047815635251461	0.0686876421271596	-0.696131556866389	0.487014475967893	-0.18244094000367	0.086809669500748
score	Syst Biol	any_affil_usaTRUE	0.621108364903546	0.185768622285901	3.34345142500788	0.00095869064295268	0.257008555765555	0.985208174041536
score	Syst Biol	any_affil_nature_indexTRUE	0.0790055807751201	0.190232370181848	0.415310920531541	0.678282293352634	-0.293843013474993	0.451854175025233
score	Syst Biol	last_author_pub_age	-0.0141287748290606	0.0169708484579603	-0.832532024787098	0.405929539547456	-0.0473910265937499	0.0191334769356286
score	eNeuro	(Intercept)	1.69335400438081	0.694030051929278	2.43988570764853	0.0149397592223388	0.333080098410962	3.05362791035066
score	eNeuro	preprintTRUE	0.355744758595536	0.24314491584668	1.46309766485045	0.14389079484162	-0.120810519487978	0.832300036679051
score	eNeuro	ns(pub_date, df = 3)1	1.22424278379718	0.270808870424853	4.52068937725914	7.23991267418776e-06	0.693467151070495	1.75501841652387
score	eNeuro	ns(pub_date, df = 3)2	0.3608128477715	0.684489989640496	0.527126551494208	0.598273199106746	-0.980762879702066	1.70238857524507
score	eNeuro	ns(pub_date, df = 3)3	1.03513788541238	0.247446206935411	4.18328451356125	3.23968792013371e-05	0.550152231707927	1.52012353911683
score	eNeuro	log2(authors)	0.168452357213418	0.0820175232322799	2.0538581339057	0.0403613925460074	0.00770096557697197	0.329203748849863
score	eNeuro	log2(references + 1)	-0.00680053077126488	0.103909387923501	-0.0654467407340664	0.947837049713233	-0.210459188756927	0.196858127214398
score	eNeuro	any_affil_usaTRUE	-0.0796921372762489	0.137590943198277	-0.579196096951	0.56264373162963	-0.349365430543769	0.189981155991271
score	eNeuro	any_affil_nature_indexTRUE	0.351136492168993	0.138106906980175	2.54249769143985	0.0112212336835794	0.0804519284716261	0.62182105586636
score	eNeuro	last_author_pub_age	-0.0234201000070125	0.0079300399130039	-2.95333948680479	0.00324920394539313	-0.0389626926324652	-0.00787750738155968
