# Supplementary material for: Releasing a preprint is associated with more attention and citations for the peer-reviewed article
Source: eLife journal article supplement (doi:10.7554/elife.52646), 2019-12-06
Supplement: supp [file elife-52646-supp-v1.zip › elife_poa_e52646_Supplementary_file_12.csv]

Metric	Variable	Coefficient	Standard error	t-statistic	p-value	95% CI (lower)	95% CI (upper)	Adjusted p-value
citations	(Intercept)	0.222370901325536	0.123082875152791	1.8066762012952	0.0794168829877702	-0.0275006193539919	0.472242422005064	0.0794168829877702
citations	accessimmediately open	-0.0128239610659925	0.0685117143660826	-0.18717910045966	0.852601072213205	-0.1519101355786	0.126262213446615	0.852601072213205
citations	log2(impact_factor)	0.0438749851333574	0.0362215895079335	1.21129375406752	0.233898158599482	-0.0296587509005279	0.117408721167243	0.467796317198964
citations	log2(per_preprints)	0.0369171690879359	0.0287817553919773	1.282658704626	0.208041486369763	-0.0215129007222792	0.095347238898151	0.208041486369763
Attention Score	(Intercept)	0.764673451264179	0.137173254804693	5.57450832782906	2.8103300057431e-06	0.486196939141267	1.04314996338709	5.6206600114862e-06
Attention Score	accessimmediately open	0.118403016273745	0.0763548531034773	1.55069404839641	0.129971346177621	-0.036605576372015	0.273411608919504	0.259942692355242
Attention Score	log2(impact_factor)	-0.0248538813833686	0.0403681935511733	-0.6156798012738	0.542089168506606	-0.10680567116075	0.0570979083940125	0.542089168506606
Attention Score	log2(per_preprints)	-0.0638751174805238	0.0320766561652791	-1.99132718670547	0.054295153204122	-0.128994191473417	0.00124395651236944	0.108590306408244
