# Supplementary material for: Releasing a preprint is associated with more attention and citations for the peer-reviewed article
Source: eLife journal article supplement (doi:10.7554/elife.52646), 2019-12-06
Supplement: supp [file elife-52646-supp-v1.zip › elife_poa_e52646_Supplementary_file_13.csv]

Country	Number of affiliations	Number of articles	Fraction of articles
usa	248375	39748	0.535405918721966
uk	48845	9990	0.134565390158811
germany	43601	8607	0.115936367677366
china	51978	7197	0.0969436549522488
france	32167	5594	0.0753512304853244
canada	22045	4735	0.0637804927329301
japan	21269	3918	0.0527754953595819
australia	16577	3342	0.045016770161236
switzerland	12185	2976	0.0400867468581204
netherlands	13388	2853	0.038429935748057
spain	12551	2720	0.0366384245477445
italy	11308	2367	0.0318835113619526
sweden	7254	1936	0.0260779374722181
denmark	5606	1443	0.0194372230229394
israel	5670	1386	0.0186694325085198
belgium	6064	1344	0.0181036921294737
brazil	6561	1265	0.0170395614165062
south korea	6436	1263	0.0170126213984563
india	4528	1088	0.0146553698190978
austria	3958	1068	0.0143859696385997
singapore	4491	947	0.012756098546586
finland	4291	843	0.0113552176079958
norway	2939	742	0.00999474669648029
taiwan	3753	703	0.00946941634450895
russia	2740	649	0.00874203585716403
portugal	2229	589	0.00793383531566966
czech republic	2122	559	0.00752973504492248
	595	548	0.00738156494564851
poland	1755	515	0.00693705464782661
new zealand	1413	444	0.00598068400705829
south africa	1480	425	0.00572475383558507
ireland	1319	417	0.00561699376338582
argentina	1685	414	0.0055765837363111
mexico	1503	408	0.00549576368216167
saudi arabia	1124	379	0.00510513342043939
hungary	1108	289	0.00389283260819785
greece	993	278	0.00374466250892388
thailand	963	269	0.00362343242769973
chile	835	232	0.0031250420937782
turkey	619	222	0.00299034200352914
colombia	596	199	0.0026805317959563
estonia	716	190	0.00255930171473215
hong kong	692	173	0.00233031156130875
kenya	573	166	0.0022360214981344
egypt	239	161	0.00216867145300987
malaysia	554	148	0.00199356133568609
slovenia	288	120	0.00161640108298873
croatia	266	117	0.00157599105591401
iran	359	112	0.00150864101078948
uganda	347	111	0.00149517100176457
iceland	908	110	0.00148170099273967
vietnam	454	109	0.00146823098371476
pakistan	284	108	0.00145476097468985
tanzania	362	102	0.00137394092054042
peru	463	102	0.00137394092054042
bangladesh	430	101	0.00136047091151551
ghana	345	93	0.00125271083931626
ethiopia	321	87	0.00117189078516683
united arab emirates	136	85	0.00114495076711701
indonesia	233	82	0.0011045407400423
luxembourg	204	75	0.00101025067686795
qatar	159	74	0.000996780667843047
nigeria	289	71	0.000956370640768329
uruguay	257	70	0.000942900631743423
cameroon	308	69	0.000929430622718517
lithuania	188	63	0.000848610568569081
romania	151	62	0.000835140559544175
scotland	190	59	0.000794730532469457
slovakia	117	59	0.000794730532469457
department of psychology	124	56	0.000754320505394739
philippines	182	55	0.000740850496369833
burkina faso	165	55	0.000740850496369833
department of medicine	172	51	0.000686970460270208
department of neurology	158	50	0.000673500451245302
senegal	137	49	0.000660030442220396
sri lanka	194	47	0.000633090424170584
ivory coast	159	47	0.000633090424170584
department of neuroscience	128	47	0.000633090424170584
tunisia	179	44	0.000592680397095866
serbia	101	43	0.00057921038807096
from the departments of biochemistry	194	40	0.000538800360996242
ecuador	98	39	0.000525330351971336
medicine	74	39	0.000525330351971336
benin	136	38	0.00051186034294643
from the departments of chemistry	116	38	0.00051186034294643
malawi	119	37	0.000498390333921524
congo	117	37	0.000498390333921524
cambodia	162	37	0.000498390333921524
panama	109	36	0.000484920324896618
nepal	138	36	0.000484920324896618
mali	100	35	0.000471450315871712
from the departments of pharmacology	135	35	0.000471450315871712
school of medicine	128	34	0.000457980306846806
department of pharmacology	106	33	0.0004445102978219
department of psychiatry	83	33	0.0004445102978219
laos	147	33	0.0004445102978219
costa rica	91	30	0.000404100270747181
zambia	64	30	0.000404100270747181
from the department of biochemistry	135	30	0.000404100270747181
from the department of biochemistry molecular biology	133	30	0.000404100270747181
bulgaria	61	29	0.000390630261722275
lebanon	65	29	0.000390630261722275
cuba	73	29	0.000390630261722275
department of computer science	67	29	0.000390630261722275
shanghai	189	29	0.000390630261722275
pathology	39	29	0.000390630261722275
morocco	104	28	0.000377160252697369
gambia	83	28	0.000377160252697369
sudan	83	28	0.000377160252697369
biochemistry	49	27	0.000363690243672463
department of genetics	76	26	0.000350220234647557
gabon	106	26	0.000350220234647557
cyprus	39	25	0.000336750225622651
from the departments of biochemistry molecular biology	101	24	0.000323280216597745
department of neurobiology	64	24	0.000323280216597745
department of internal medicine	93	23	0.000309810207572839
from the departments of medicine	100	23	0.000309810207572839
papua new guinea	60	22	0.000296340198547933
department of biology	57	22	0.000296340198547933
fiji	63	21	0.000282870189523027
venezuela	53	21	0.000282870189523027
madagascar	72	21	0.000282870189523027
nevada	73	21	0.000282870189523027
berkeley	33	21	0.000282870189523027
chemistry	36	21	0.000282870189523027
guinea	48	20	0.000269400180498121
ne	48	20	0.000269400180498121
department of physiology	58	20	0.000269400180498121
mozambique	85	20	0.000269400180498121
kuwait	26	19	0.000255930171473215
department of biochemistry molecular biology	44	19	0.000255930171473215
sierra leone	114	19	0.000255930171473215
departments of neurology	73	19	0.000255930171473215
department of pediatrics	57	18	0.000242460162448309
french guiana	50	18	0.000242460162448309
university of georgia	42	18	0.000242460162448309
pediatrics	27	18	0.000242460162448309
victoria	115	18	0.000242460162448309
neuroscience	43	18	0.000242460162448309
algeria	41	17	0.000228990153423403
kazakhstan	34	17	0.000228990153423403
iraq	23	17	0.000228990153423403
department of biomedical engineering	29	17	0.000228990153423403
cornell university	40	17	0.000228990153423403
university of arizona	33	17	0.000228990153423403
from the departments of pathology	72	17	0.000228990153423403
tennessee 37232-0146	72	17	0.000228990153423403
from the departments of biological sciences	71	17	0.000228990153423403
french polynesia	35	16	0.000215520144398497
department of biochemistry	38	16	0.000215520144398497
department of pathology	44	16	0.000215520144398497
wyoming	32	16	0.000215520144398497
harvard university	27	16	0.000215520144398497
from the departments of internal medicine	66	16	0.000215520144398497
neurology	40	16	0.000215520144398497
neuroscience graduate program	29	16	0.000215520144398497
guatemala	47	16	0.000215520144398497
solomon islands	43	16	0.000215520144398497
jordan	19	15	0.000202050135373591
department of computer science engineering	32	15	0.000202050135373591
myanmar	45	15	0.000202050135373591
zimbabwe	29	15	0.000202050135373591
cell biology	29	15	0.000202050135373591
the departments of biochemistry molecular biology	32	15	0.000202050135373591
pharmacology	24	15	0.000202050135373591
d. c	37	15	0.000202050135373591
departments of pharmacology	67	15	0.000202050135373591
liberia	78	15	0.000202050135373591
school of life sciences	53	14	0.000188580126348685
college of life sciences	80	14	0.000188580126348685
faculty of medicine	37	14	0.000188580126348685
howard hughes medical institute	25	14	0.000188580126348685
college of medicine	61	14	0.000188580126348685
departments of physiology	52	14	0.000188580126348685
togo	70	14	0.000188580126348685
botswana	25	13	0.000175110117323779
faculty of science	47	13	0.000175110117323779
new caledonia	48	13	0.000175110117323779
biochemistry molecular biology	31	13	0.000175110117323779
psychiatry	31	13	0.000175110117323779
nicaragua	51	13	0.000175110117323779
belarus	16	12	0.000161640108298873
g1v 0a6	35	12	0.000161640108298873
madrid	42	12	0.000161640108298873
department of biological sciences	32	12	0.000161640108298873
department of surgery	20	12	0.000161640108298873
department of physiology pharmacology	30	12	0.000161640108298873
university of florida	26	12	0.000161640108298873
bloomington	40	12	0.000161640108298873
college of pharmacy	38	12	0.000161640108298873
michigan 48109-0600	39	12	0.000161640108298873
the departments of biochemistry	31	12	0.000161640108298873
graduate school of medicine	43	12	0.000161640108298873
from the departments of biology	47	12	0.000161640108298873
latvia	19	11	0.000148170099273967
department of chemistry	24	11	0.000148170099273967
stanford university	20	11	0.000148170099273967
iowa state university	22	11	0.000148170099273967
m5s 3b2	29	11	0.000148170099273967
from the department of chemistry	29	11	0.000148170099273967
from the department of pharmacology	33	11	0.000148170099273967
physiology	24	11	0.000148170099273967
internal medicine	20	11	0.000148170099273967
biology	25	11	0.000148170099273967
departments of psychology	17	11	0.000148170099273967
departments of psychiatry	31	11	0.000148170099273967
macedonia	20	10	0.00013470009024906
bolivia	28	10	0.00013470009024906
berlin	45	10	0.00013470009024906
university of michigan	19	10	0.00013470009024906
university of pennsylvania	19	10	0.00013470009024906
duke university	27	10	0.00013470009024906
department of cell biology	24	10	0.00013470009024906
departments of medicine	28	10	0.00013470009024906
from the departments of pediatrics	39	10	0.00013470009024906
surgery	16	10	0.00013470009024906
from the department of biological sciences	40	10	0.00013470009024906
from the departments of physiology	42	10	0.00013470009024906
the departments of medicine	19	10	0.00013470009024906
from the departments of microbiology immunology	36	10	0.00013470009024906
from the departments of cell biology	32	10	0.00013470009024906
haiti	26	10	0.00013470009024906
department of bioengineering	14	9	0.000121230081224154
school of biomedical sciences	29	9	0.000121230081224154
lineberger comprehensive cancer center	34	9	0.000121230081224154
alaska	15	9	0.000121230081224154
central african republic	27	9	0.000121230081224154
mongolia	18	9	0.000121230081224154
vanderbilt university	28	9	0.000121230081224154
temple university	17	9	0.000121230081224154
mississippi state university	17	9	0.000121230081224154
texas a&m university	26	9	0.000121230081224154
taipei	31	9	0.000121230081224154
west indies	10	9	0.000121230081224154
from the departments of neurology	46	9	0.000121230081224154
from the departments of chemistry biochemistry	40	9	0.000121230081224154
departments of biochemistry	27	9	0.000121230081224154
from the department of biology	28	9	0.000121230081224154
from the department of chemistry biochemistry	33	9	0.000121230081224154
physiology biophysics	20	9	0.000121230081224154
developmental biology	28	9	0.000121230081224154
departments of neuroscience	21	9	0.000121230081224154
graduate program in neuroscience	13	9	0.000121230081224154
palestine	34	8	0.000107760072199248
armenia	13	8	0.000107760072199248
department of biomedical informatics	14	8	0.000107760072199248
los angeles	24	8	0.000107760072199248
department of human genetics	14	8	0.000107760072199248
structural biology	13	8	0.000107760072199248
47405	10	8	0.000107760072199248
south dakota	16	8	0.000107760072199248
oregon 97239-3098	20	8	0.000107760072199248
ky	25	8	0.000107760072199248
university of illinois at urbana-champaign	14	8	0.000107760072199248
university of utah	21	8	0.000107760072199248
davis	14	8	0.000107760072199248
hi	9	8	0.000107760072199248
niger	13	8	0.000107760072199248
mt	18	8	0.000107760072199248
biostatistics	11	8	0.000107760072199248
osaka 565-0871	33	8	0.000107760072199248
the departments of pharmacology	24	8	0.000107760072199248
texas 78229-3900	32	8	0.000107760072199248
nanjing	42	8	0.000107760072199248
the department of chemistry	23	8	0.000107760072199248
from the departments of infectious diseases	33	8	0.000107760072199248
department of neurosciences	44	8	0.000107760072199248
the departments of chemistry	25	8	0.000107760072199248
new south wales	30	8	0.000107760072199248
obstetrics gynecology	10	8	0.000107760072199248
neurobiology	11	8	0.000107760072199248
nv	24	8	0.000107760072199248
columbia	20	7	9.42900631743423e-05
yemen	15	7	9.42900631743423e-05
v6t 1z4	21	7	9.42900631743423e-05
department of statistics	10	7	9.42900631743423e-05
department of cell developmental biology	16	7	9.42900631743423e-05
department of chemistry biochemistry	19	7	9.42900631743423e-05
canada h3t 1j4	9	7	9.42900631743423e-05
university of wisconsin-madison	19	7	9.42900631743423e-05
perelman school of medicine	21	7	9.42900631743423e-05
wy	22	7	9.42900631743423e-05
new york 14853-2703	20	7	9.42900631743423e-05
department of microbiology immunology	13	7	9.42900631743423e-05
north carolina 27599-7264	19	7	9.42900631743423e-05
california 94720-3202	17	7	9.42900631743423e-05
zilkha neurogenetic institute	19	7	9.42900631743423e-05
ar	11	7	9.42900631743423e-05
michigan state university	19	7	9.42900631743423e-05
lincoln	11	7	9.42900631743423e-05
pennsylvania state university	19	7	9.42900631743423e-05
washington dc	10	7	9.42900631743423e-05
university of rochester	18	7	9.42900631743423e-05
honduras	9	7	9.42900631743423e-05
from the department of medicine	36	7	9.42900631743423e-05
anatomy	18	7	9.42900631743423e-05
new york 11973-5000	7	7	9.42900631743423e-05
wuhan	35	7	9.42900631743423e-05
from the complex carbohydrate research center	34	7	9.42900631743423e-05
from the departments of chemistry chemical biology	23	7	9.42900631743423e-05
college of veterinary medicine	31	7	9.42900631743423e-05
microbiology immunology	11	7	9.42900631743423e-05
north carolina 27599-7260	34	7	9.42900631743423e-05
from the departments of physiology biophysics	27	7	9.42900631743423e-05
from the school of biomedical sciences	19	7	9.42900631743423e-05
from the department of internal medicine	37	7	9.42900631743423e-05
biological chemistry	11	7	9.42900631743423e-05
from the departments of bioengineering	25	7	9.42900631743423e-05
the departments of neurology	23	7	9.42900631743423e-05
malta	10	7	9.42900631743423e-05
neuroscience program	10	7	9.42900631743423e-05
department of anesthesiology	22	7	9.42900631743423e-05
department of otolaryngology	18	7	9.42900631743423e-05
department of psychological brain sciences	27	7	9.42900631743423e-05
rwanda	8	7	9.42900631743423e-05
jamaica	13	6	8.08200541494363e-05
chad	17	6	8.08200541494363e-05
bosnia herzegovina	13	6	8.08200541494363e-05
department of electrical computer engineering	10	6	8.08200541494363e-05
university of washington	9	6	8.08200541494363e-05
department of pharmacology toxicology	24	6	8.08200541494363e-05
department of psychiatry behavioral sciences	18	6	8.08200541494363e-05
david geffen school of medicine	19	6	8.08200541494363e-05
department of neurobiology behavior	15	6	8.08200541494363e-05
department of pathology laboratory medicine	12	6	8.08200541494363e-05
libya	11	6	8.08200541494363e-05
48109	6	6	8.08200541494363e-05
greenland	18	6	8.08200541494363e-05
university of alabama at birmingham	14	6	8.08200541494363e-05
ann arbor	13	6	8.08200541494363e-05
id	18	6	8.08200541494363e-05
washington 99164-7520	16	6	8.08200541494363e-05
namibia	9	6	8.08200541494363e-05
new york 11794-5215	14	6	8.08200541494363e-05
department of anatomy cell biology	13	6	8.08200541494363e-05
portland state university	18	6	8.08200541494363e-05
rutgers university	9	6	8.08200541494363e-05
university of chicago	11	6	8.08200541494363e-05
st. louis	10	6	8.08200541494363e-05
college park	9	6	8.08200541494363e-05
yale university	11	6	8.08200541494363e-05
north carolina state university	14	6	8.08200541494363e-05
irvine	14	6	8.08200541494363e-05
guangzhou	51	6	8.08200541494363e-05
life sciences institute	26	6	8.08200541494363e-05
genetics	7	6	8.08200541494363e-05
tokyo 108-8639	25	6	8.08200541494363e-05
from the departments of surgery	22	6	8.08200541494363e-05
department of molecular cell biology	10	6	8.08200541494363e-05
from the departments of neuroscience	22	6	8.08200541494363e-05
from the departments of immunology	23	6	8.08200541494363e-05
from the departments of orthopedic surgery	54	6	8.08200541494363e-05
department of pharmacology chemical biology	28	6	8.08200541494363e-05
radiology	13	6	8.08200541494363e-05
from the department of biological chemistry	18	6	8.08200541494363e-05
ontario m5g 1l7	23	6	8.08200541494363e-05
departments of chemistry	13	6	8.08200541494363e-05
immunology	10	6	8.08200541494363e-05
new delhi	21	6	8.08200541494363e-05
tokyo 113-0033	16	6	8.08200541494363e-05
medical scientist training program	9	6	8.08200541494363e-05
me	26	6	8.08200541494363e-05
program in developmental biology	14	6	8.08200541494363e-05
department of anatomy neurobiology	23	6	8.08200541494363e-05
queensland brain institute	22	6	8.08200541494363e-05
helen wills neuroscience institute	9	6	8.08200541494363e-05
department of brain cognitive sciences	10	6	8.08200541494363e-05
center for cognitive neuroscience	13	6	8.08200541494363e-05
departments of neurobiology	26	6	8.08200541494363e-05
neuroscience training program	8	6	8.08200541494363e-05
neuroscience center	21	6	8.08200541494363e-05
republic of congo	8	6	8.08200541494363e-05
south sudan	14	6	8.08200541494363e-05
oman	13	5	6.73500451245302e-05
trinidad tobago	5	5	6.73500451245302e-05
mauritius	8	5	6.73500451245302e-05
department of obstetrics gynecology	9	5	6.73500451245302e-05
biophysics	15	5	6.73500451245302e-05
school of physics	8	5	6.73500451245302e-05
curriculum in genetics molecular biology	8	5	6.73500451245302e-05
department of mathematics	8	5	6.73500451245302e-05
department of physics	13	5	6.73500451245302e-05
school of public health	7	5	6.73500451245302e-05
canada t2n 4n1	18	5	6.73500451245302e-05
monaco	7	5	6.73500451245302e-05
suriname	15	5	6.73500451245302e-05
cameroun	6	5	6.73500451245302e-05
60637	5	5	6.73500451245302e-05
02138	7	5	6.73500451245302e-05
94720	5	5	6.73500451245302e-05
55108	6	5	6.73500451245302e-05
pr	107	5	6.73500451245302e-05
michigan 48824-1319	21	5	6.73500451245302e-05
ontario canada	13	5	6.73500451245302e-05
philadelphia	9	5	6.73500451245302e-05
polynésie française	11	5	6.73500451245302e-05
graduate school of science	14	5	6.73500451245302e-05
california 94720-3102	12	5	6.73500451245302e-05
texas 77843-3258	9	5	6.73500451245302e-05
california 94158-2517	19	5	6.73500451245302e-05
department of molecular physiology biophysics	22	5	6.73500451245302e-05
the university of texas at austin	13	5	6.73500451245302e-05
washington state university	9	5	6.73500451245302e-05
oregon state university	15	5	6.73500451245302e-05
university of massachusetts amherst	10	5	6.73500451245302e-05
austin	10	5	6.73500451245302e-05
university of minnesota	20	5	6.73500451245302e-05
university of texas at austin	16	5	6.73500451245302e-05
university of notre dame	9	5	6.73500451245302e-05
arizona state university	28	5	6.73500451245302e-05
albania	11	5	6.73500451245302e-05
queensland australia	16	5	6.73500451245302e-05
from the departments of biomedical sciences	14	5	6.73500451245302e-05
from the departments of biomedical engineering	17	5	6.73500451245302e-05
from the departments of molecular physiology biophysics	19	5	6.73500451245302e-05
from the eppley institute for research in cancer allied diseases	24	5	6.73500451245302e-05
harvard medical school	15	5	6.73500451245302e-05
boston children's hospital	12	5	6.73500451245302e-05
from the departments of nutrition	21	5	6.73500451245302e-05
niddk	8	5	6.73500451245302e-05
department of cellular molecular medicine	14	5	6.73500451245302e-05
kolkata	13	5	6.73500451245302e-05
the departments of physiology	22	5	6.73500451245302e-05
from the departments of ophthalmology visual sciences	18	5	6.73500451245302e-05
from the departments of pharmacology cancer biology	15	5	6.73500451245302e-05
from the departments of microbiology	14	5	6.73500451245302e-05
california 92093-0636	10	5	6.73500451245302e-05
oncology	9	5	6.73500451245302e-05
ophthalmology	16	5	6.73500451245302e-05
tokyo 156-8506	11	5	6.73500451245302e-05
neurosurgery	6	5	6.73500451245302e-05
fukuoka 812-8582	23	5	6.73500451245302e-05
california 92521-0403	13	5	6.73500451245302e-05
from the department of neuroscience	28	5	6.73500451245302e-05
from the department of molecular cell biology	13	5	6.73500451245302e-05
department of biochemistry biophysics	14	5	6.73500451245302e-05
faculté de médecine	14	5	6.73500451245302e-05
jiangsu	44	5	6.73500451245302e-05
the department of pathology	9	5	6.73500451245302e-05
from the departments of anesthesiology	33	5	6.73500451245302e-05
interdepartmental neuroscience program	9	5	6.73500451245302e-05
biomedicine discovery institute	21	5	6.73500451245302e-05
graduate school of medical sciences	8	5	6.73500451245302e-05
carolina institute for developmental disabilities	18	5	6.73500451245302e-05
departments of pediatrics	17	5	6.73500451245302e-05
faculty of health sciences	30	5	6.73500451245302e-05
center for neural science	10	5	6.73500451245302e-05
department of neurological surgery	10	5	6.73500451245302e-05
center for neuroscience	6	5	6.73500451245302e-05
ma united states of america	12	5	6.73500451245302e-05
angola	17	5	6.73500451245302e-05
republic of kazakhstan	4	4	5.38800360996242e-05
department of mechanical engineering	8	4	5.38800360996242e-05
school of computer science technology	9	4	5.38800360996242e-05
gif-sur-yvette	20	4	5.38800360996242e-05
department of computational medicine bioinformatics	9	4	5.38800360996242e-05
faculty of life sciences	13	4	5.38800360996242e-05
department of biostatistics	6	4	5.38800360996242e-05
london	5	4	5.38800360996242e-05
school of life environmental sciences	22	4	5.38800360996242e-05
qld australia	6	4	5.38800360996242e-05
chinese academy of sciences	15	4	5.38800360996242e-05
freiburg	7	4	5.38800360996242e-05
department of pathology cell biology	13	4	5.38800360996242e-05
emory university school of medicine	14	4	5.38800360996242e-05
department of otolaryngology-head neck surgery	13	4	5.38800360996242e-05
heidelberg	10	4	5.38800360996242e-05
taipei taiwan	6	4	5.38800360996242e-05
japan science technology agency	12	4	5.38800360996242e-05
canada k1h 8m5	8	4	5.38800360996242e-05
canada h3a 1a3	9	4	5.38800360996242e-05
canada v5a 1s6	6	4	5.38800360996242e-05
canada h2w 1r7	14	4	5.38800360996242e-05
canada h3g 1a4	9	4	5.38800360996242e-05
canada g1v 0a6	5	4	5.38800360996242e-05
cnrs umr	13	4	5.38800360996242e-05
27599	4	4	5.38800360996242e-05
seychelles	10	4	5.38800360996242e-05
washington 99164-6420	11	4	5.38800360996242e-05
california 94305-5020	8	4	5.38800360996242e-05
nebraska 68583-0915	9	4	5.38800360996242e-05
equatorial guinea	8	4	5.38800360996242e-05
canada n6a 5b7	9	4	5.38800360996242e-05
113-0033 japan	11	4	5.38800360996242e-05
california 94720-3220	8	4	5.38800360996242e-05
california 94720-3200	10	4	5.38800360996242e-05
cellular molecular medicine	4	4	5.38800360996242e-05
the ohio state university	8	4	5.38800360996242e-05
texas tech university	7	4	5.38800360996242e-05
riverside	6	4	5.38800360996242e-05
st louis	16	4	5.38800360996242e-05
university of kansas	5	4	5.38800360996242e-05
utah state university	6	4	5.38800360996242e-05
purdue university	7	4	5.38800360996242e-05
louisiana state university	31	4	5.38800360996242e-05
reno	11	4	5.38800360996242e-05
san diego	6	4	5.38800360996242e-05
athens	9	4	5.38800360996242e-05
university of kentucky	7	4	5.38800360996242e-05
university of new hampshire	9	4	5.38800360996242e-05
wayne state university	10	4	5.38800360996242e-05
ms	14	4	5.38800360996242e-05
dominican republic	9	4	5.38800360996242e-05
department of molecular cellular biology	9	4	5.38800360996242e-05
dc usa	11	4	5.38800360996242e-05
il usa	5	4	5.38800360996242e-05
from the institute of molecular medicine	17	4	5.38800360996242e-05
from the department of microbiology immunology	9	4	5.38800360996242e-05
radiation oncology	6	4	5.38800360996242e-05
from the department of physiology biophysics	12	4	5.38800360996242e-05
the departments of life sciences	4	4	5.38800360996242e-05
school of chemistry	11	4	5.38800360996242e-05
from the department of pediatrics	24	4	5.38800360996242e-05
from the departments of biological chemistry	14	4	5.38800360996242e-05
from the departments of cell biology physiology	17	4	5.38800360996242e-05
the departments of pathology laboratory medicine	9	4	5.38800360996242e-05
yokohama 226-8503	15	4	5.38800360996242e-05
saitama 351-0198	10	4	5.38800360996242e-05
from the department of physiology	19	4	5.38800360996242e-05
faculty of biology	6	4	5.38800360996242e-05
prague	9	4	5.38800360996242e-05
from the department of pharmacology toxicology	16	4	5.38800360996242e-05
human genetics	7	4	5.38800360996242e-05
texas 75390-9041	7	4	5.38800360996242e-05
molecular biology	10	4	5.38800360996242e-05
from the department of biochemistry biophysics	17	4	5.38800360996242e-05
physics	7	4	5.38800360996242e-05
tokyo 113-0032	17	4	5.38800360996242e-05
lerner research institute	28	4	5.38800360996242e-05
from the departments of neurobiology	12	4	5.38800360996242e-05
bangalore	9	4	5.38800360996242e-05
ministry of education	31	4	5.38800360996242e-05
from the departments of pharmacology toxicology	17	4	5.38800360996242e-05
from the departments of molecular cellular biology	25	4	5.38800360996242e-05
the department of medicine	25	4	5.38800360996242e-05
molecular physiology biophysics	7	4	5.38800360996242e-05
ontario l8s 4k1	22	4	5.38800360996242e-05
biochemistry biophysics	9	4	5.38800360996242e-05
from the markey cancer center	20	4	5.38800360996242e-05
faculty of pharmaceutical sciences	14	4	5.38800360996242e-05
indiana 46202-5126	10	4	5.38800360996242e-05
departments of pathology	7	4	5.38800360996242e-05
nci	21	4	5.38800360996242e-05
kyoto 606-8507	5	4	5.38800360996242e-05
boston massachusetts	12	4	5.38800360996242e-05
from the department of pathology laboratory medicine	17	4	5.38800360996242e-05
sendai 980-8575	20	4	5.38800360996242e-05
from the departments of orthopaedic surgery	16	4	5.38800360996242e-05
cell developmental biology	6	4	5.38800360996242e-05
from the departments of cellular molecular medicine	17	4	5.38800360996242e-05
fred pamela buffett cancer center	13	4	5.38800360996242e-05
toyama 930-0194	11	4	5.38800360996242e-05
cancer biology	10	4	5.38800360996242e-05
from the molecular structural biology division	19	4	5.38800360996242e-05
from the school of biological sciences	19	4	5.38800360996242e-05
from the departments of molecular genetics	27	4	5.38800360996242e-05
texas 75390-9046	16	4	5.38800360996242e-05
departments of ophthalmology	11	4	5.38800360996242e-05
from the departments of molecular cellular biochemistry	23	4	5.38800360996242e-05
ohio 43606-3390	15	4	5.38800360996242e-05
from the departments of cancer biology	24	4	5.38800360996242e-05
from the departments of molecular medicine	17	4	5.38800360996242e-05
robert wood johnson medical school	14	4	5.38800360996242e-05
tokyo 113-8657	12	4	5.38800360996242e-05
tennessee 37232-6600	15	4	5.38800360996242e-05
from the department of pathology	19	4	5.38800360996242e-05
biomedical engineering	5	4	5.38800360996242e-05
molecular genetics	8	4	5.38800360996242e-05
department of cell biology physiology	20	4	5.38800360996242e-05
department of developmental biology	12	4	5.38800360996242e-05
from the school of life sciences	26	4	5.38800360996242e-05
institute for neuroscience	15	4	5.38800360996242e-05
center for structural biology	4	4	5.38800360996242e-05
physiology pharmacology	12	4	5.38800360996242e-05
department of neurosurgery	15	4	5.38800360996242e-05
institute of neuroscience	8	4	5.38800360996242e-05
program in neuroscience	10	4	5.38800360996242e-05
institute for memory impairments neurological disorders	17	4	5.38800360996242e-05
departments of neurosciences	12	4	5.38800360996242e-05
sanders-brown center on aging	19	4	5.38800360996242e-05
neuroscience interdepartmental program	6	4	5.38800360996242e-05
london united kingdom	11	4	5.38800360996242e-05
ca 94720-3202	14	4	5.38800360996242e-05
de	7	4	5.38800360996242e-05
university of california san diego	14	4	5.38800360996242e-05
seattle	4	4	5.38800360996242e-05
t2n 1n4	6	4	5.38800360996242e-05
the czech republic	19	4	5.38800360996242e-05
united sates of america	7	4	5.38800360996242e-05
italia	13	4	5.38800360996242e-05
united states america	10	4	5.38800360996242e-05
bhutan	6	4	5.38800360996242e-05
pa 19104	3	3	4.04100270747181e-05
republic of belarus	4	3	4.04100270747181e-05
la usa	3	3	4.04100270747181e-05
lausanne switzerland	7	3	4.04100270747181e-05
state of qatar	5	3	4.04100270747181e-05
syria	7	3	4.04100270747181e-05
wellcome trust centre for human genetics	9	3	4.04100270747181e-05
cambridge cb2 0ah	3	3	4.04100270747181e-05
department of bioinformatics	5	3	4.04100270747181e-05
peking university health science center	16	3	4.04100270747181e-05
brown university	4	3	4.04100270747181e-05
university of california san francisco	4	3	4.04100270747181e-05
ia usa	5	3	4.04100270747181e-05
department of biomedical sciences	6	3	4.04100270747181e-05
azerbaijan	4	3	4.04100270747181e-05
department of agronomy	7	3	4.04100270747181e-05
program in computational biology bioinformatics	5	3	4.04100270747181e-05
department of systems biology	5	3	4.04100270747181e-05
university health network	4	3	4.04100270747181e-05
brigham women's hospital	13	3	4.04100270747181e-05
university of toronto	9	3	4.04100270747181e-05
school of biological sciences	5	3	4.04100270747181e-05
mcdonnell genome institute	15	3	4.04100270747181e-05
department of molecular medicine	5	3	4.04100270747181e-05
university of maryland school of medicine	7	3	4.04100270747181e-05
tübingen	8	3	4.04100270747181e-05
department of nutrition	5	3	4.04100270747181e-05
department of cancer biology	6	3	4.04100270747181e-05
division of biomedical statistics informatics	8	3	4.04100270747181e-05
macau	6	3	4.04100270747181e-05
leipzig	10	3	4.04100270747181e-05
d.c	7	3	4.04100270747181e-05
department of biophysics	7	3	4.04100270747181e-05
ct usa	4	3	4.04100270747181e-05
h3g 1y6	12	3	4.04100270747181e-05
tn usa	6	3	4.04100270747181e-05
oslo norway	11	3	4.04100270747181e-05
canada t2n 1n4	17	3	4.04100270747181e-05
canada m5g 1x5	8	3	4.04100270747181e-05
canada m5s 3g5	14	3	4.04100270747181e-05
canada h1t 2m4	13	3	4.04100270747181e-05
canada h3a 0g4	3	3	4.04100270747181e-05
k7l 3n6	6	3	4.04100270747181e-05
mo usa	12	3	4.04100270747181e-05
h4a 3j1 canada	7	3	4.04100270747181e-05
h3g 1y6 canada	7	3	4.04100270747181e-05
university of texas southwestern medical center	9	3	4.04100270747181e-05
co usa	9	3	4.04100270747181e-05
samoa	6	3	4.04100270747181e-05
paraguay	7	3	4.04100270747181e-05
europe	14	3	4.04100270747181e-05
30602	3	3	4.04100270747181e-05
50011	3	3	4.04100270747181e-05
06520	5	3	4.04100270747181e-05
27708	3	3	4.04100270747181e-05
77204	3	3	4.04100270747181e-05
14853	4	3	4.04100270747181e-05
78712	3	3	4.04100270747181e-05
k1n 6n5	5	3	4.04100270747181e-05
53706	3	3	4.04100270747181e-05
república de panamá	7	3	4.04100270747181e-05
queensland	5	3	4.04100270747181e-05
north carolina 27695-7614	7	3	4.04100270747181e-05
georgia 30602-6810	10	3	4.04100270747181e-05
iowa 52242-1324	8	3	4.04100270747181e-05
v5a 1s6 canada	10	3	4.04100270747181e-05
north carolina 27599-3280	11	3	4.04100270747181e-05
north dakota 58108-6050	10	3	4.04100270747181e-05
texas 77845-3258	10	3	4.04100270747181e-05
florida 32306-4295	5	3	4.04100270747181e-05
kunming china	6	3	4.04100270747181e-05
division of neurology	9	3	4.04100270747181e-05
biological sciences	4	3	4.04100270747181e-05
bioinformatics computational biology curriculum	5	3	4.04100270747181e-05
maryland 21205-2185	14	3	4.04100270747181e-05
drexel university	6	3	4.04100270747181e-05
new york 10003-6688	7	3	4.04100270747181e-05
canada n2l 3g1	3	3	4.04100270747181e-05
the pennsylvania state university	10	3	4.04100270747181e-05
university of california riverside	3	3	4.04100270747181e-05
city university of new york	6	3	4.04100270747181e-05
university of miami	9	3	4.04100270747181e-05
national institutes of health	6	3	4.04100270747181e-05
madison	5	3	4.04100270747181e-05
princeton university	5	3	4.04100270747181e-05
massachusetts institute of technology	3	3	4.04100270747181e-05
durham	5	3	4.04100270747181e-05
baylor college of medicine	4	3	4.04100270747181e-05
dartmouth college	5	3	4.04100270747181e-05
georgia institute of technology	5	3	4.04100270747181e-05
amherst	5	3	4.04100270747181e-05
university of michigan medical school	7	3	4.04100270747181e-05
chapel hill	12	3	4.04100270747181e-05
baton rouge	14	3	4.04100270747181e-05
auburn university	5	3	4.04100270747181e-05
university of virginia	4	3	4.04100270747181e-05
university of california santa cruz	6	3	4.04100270747181e-05
west virginia university	4	3	4.04100270747181e-05
college station	3	3	4.04100270747181e-05
uzbekistan	6	3	4.04100270747181e-05
kyrgyzstan	3	3	4.04100270747181e-05
m5g 0a3	5	3	4.04100270747181e-05
canada h3g 1y6	13	3	4.04100270747181e-05
nm usa	3	3	4.04100270747181e-05
v6t 1z3	13	3	4.04100270747181e-05
nj usa	5	3	4.04100270747181e-05
shenzhen	12	3	4.04100270747181e-05
brunei darussalam	4	3	4.04100270747181e-05
houston texas	13	3	4.04100270747181e-05
from the department of pharmacology chemical biology	14	3	4.04100270747181e-05
biophysics biotechnology	12	3	4.04100270747181e-05
anesthesiology	4	3	4.04100270747181e-05
tennessee 37212-2637	3	3	4.04100270747181e-05
from the departments of molecular oncology	14	3	4.04100270747181e-05
cellular molecular pathology graduate program	5	3	4.04100270747181e-05
toxicology therapeutics	11	3	4.04100270747181e-05
brussels	26	3	4.04100270747181e-05
shandong	21	3	4.04100270747181e-05
seoul	6	3	4.04100270747181e-05
from the department of cell biology	9	3	4.04100270747181e-05
comparative medicine	3	3	4.04100270747181e-05
from the departments of molecular biophysics biochemistry	7	3	4.04100270747181e-05
from the verna marrs mclean department of biochemistry molecular biology	11	3	4.04100270747181e-05
california 92093-0687	12	3	4.04100270747181e-05
graduate school of engineering	14	3	4.04100270747181e-05
from the ludwig institute for cancer research	8	3	4.04100270747181e-05
renal-electrolyte division	7	3	4.04100270747181e-05
department of pharmacology nutritional sciences	4	3	4.04100270747181e-05
michigan 48109-1055	7	3	4.04100270747181e-05
utah 84112-5650	9	3	4.04100270747181e-05
from the institute of human virology	9	3	4.04100270747181e-05
pathology laboratory medicine	5	3	4.04100270747181e-05
from the departments of anatomy cell biology	14	3	4.04100270747181e-05
hiroshima 734-8553	9	3	4.04100270747181e-05
brain korea plus project for medical science	12	3	4.04100270747181e-05
the department of internal medicine	14	3	4.04100270747181e-05
college of natural sciences	15	3	4.04100270747181e-05
graduate school of pharmaceutical sciences	6	3	4.04100270747181e-05
from the department of molecular medicine	14	3	4.04100270747181e-05
from the department of molecular genetics	13	3	4.04100270747181e-05
from the departments of human molecular genetics	20	3	4.04100270747181e-05
the department of physiology	7	3	4.04100270747181e-05
tokyo 160-8582	3	3	4.04100270747181e-05
anhui	5	3	4.04100270747181e-05
sapporo 060-0812	13	3	4.04100270747181e-05
leicester le1 9hn	11	3	4.04100270747181e-05
cellular molecular physiology	4	3	4.04100270747181e-05
molecular cellular pharmacology program	3	3	4.04100270747181e-05
the department of molecular biology	5	3	4.04100270747181e-05
pennsylvania 19104-6059	9	3	4.04100270747181e-05
from the departments of genetics	9	3	4.04100270747181e-05
ontario l8n 4a6	13	3	4.04100270747181e-05
ohio state biochemistry program	5	3	4.04100270747181e-05
texas 75390-9038	13	3	4.04100270747181e-05
faculty of medical sciences	9	3	4.04100270747181e-05
from the departments of molecular integrative physiology	12	3	4.04100270747181e-05
biochemistry molecular biophysics	5	3	4.04100270747181e-05
from the departments of pathology laboratory medicine	12	3	4.04100270747181e-05
the department of pediatrics	12	3	4.04100270747181e-05
stanford california	10	3	4.04100270747181e-05
from the departments of molecular pharmacology	8	3	4.04100270747181e-05
zurich	12	3	4.04100270747181e-05
f-75013 paris	22	3	4.04100270747181e-05
department of physiology biophysics	7	3	4.04100270747181e-05
computer science	7	3	4.04100270747181e-05
from the departments of ophthalmology	13	3	4.04100270747181e-05
biochemistry & molecular biology	7	3	4.04100270747181e-05
institute of biochemistry	11	3	4.04100270747181e-05
tianjin	12	3	4.04100270747181e-05
from the division of chemistry chemical engineering	16	3	4.04100270747181e-05
from the institute of biochemistry molecular biology	11	3	4.04100270747181e-05
from the departments of pediatric dentistry	9	3	4.04100270747181e-05
orthopedic surgery	9	3	4.04100270747181e-05
daejeon	10	3	4.04100270747181e-05
bioinformatics	4	3	4.04100270747181e-05
texas 77555-1061	12	3	4.04100270747181e-05
abramson family cancer research institute	12	3	4.04100270747181e-05
school of medical sciences	11	3	4.04100270747181e-05
from the departments of chemical biological engineering	8	3	4.04100270747181e-05
kyoto 606-8502	8	3	4.04100270747181e-05
departments of surgery	4	3	4.04100270747181e-05
tokyo 153-8902	9	3	4.04100270747181e-05
dermatology	6	3	4.04100270747181e-05
kolkata-700064	11	3	4.04100270747181e-05
the department of biochemistry	7	3	4.04100270747181e-05
okazaki 444-8585	6	3	4.04100270747181e-05
from the medical scientist training program	7	3	4.04100270747181e-05
medical faculty	16	3	4.04100270747181e-05
kyoto 606-8501	3	3	4.04100270747181e-05
pharmacology toxicology	6	3	4.04100270747181e-05
from the lipid metabolism project	7	3	4.04100270747181e-05
new york 11794-5230	3	3	4.04100270747181e-05
japan 565-0871	6	3	4.04100270747181e-05
texas 77843-2128	16	3	4.04100270747181e-05
birmingham b15 2tt	10	3	4.04100270747181e-05
biochemistry program	8	3	4.04100270747181e-05
from the departments of dermatology	15	3	4.04100270747181e-05
fred & pamela buffett cancer center	16	3	4.04100270747181e-05
departments of human genetics	10	3	4.04100270747181e-05
osaka 560-0043	10	3	4.04100270747181e-05
molecular integrative physiology	4	3	4.04100270747181e-05
the department of biochemistry molecular biology	11	3	4.04100270747181e-05
molecular cell biology	6	3	4.04100270747181e-05
institute for basic science	4	3	4.04100270747181e-05
nhlbi	15	3	4.04100270747181e-05
the departments of anesthesiology	3	3	4.04100270747181e-05
from the illawarra health medical research institute	13	3	4.04100270747181e-05
tennessee 37232-2363	9	3	4.04100270747181e-05
osaka university	12	3	4.04100270747181e-05
jinan	18	3	4.04100270747181e-05
pathology immunology	5	3	4.04100270747181e-05
tokyo 113-8421	17	3	4.04100270747181e-05
the department of physics	6	3	4.04100270747181e-05
from the department of animal avian sciences	10	3	4.04100270747181e-05
psychology	7	3	4.04100270747181e-05
the biochemistry program	9	3	4.04100270747181e-05
chemical engineering	3	3	4.04100270747181e-05
department of physiology biomedical engineering	5	3	4.04100270747181e-05
missouri 63130-4899	11	3	4.04100270747181e-05
the institute of genetics	21	3	4.04100270747181e-05
the institute for molecular bioscience	11	3	4.04100270747181e-05
from the departments of antibody discovery protein engineering	23	3	4.04100270747181e-05
from the department of molecular biology	16	3	4.04100270747181e-05
the molecular biology institute	10	3	4.04100270747181e-05
departments of psychiatry behavioral sciences	7	3	4.04100270747181e-05
the departments of biological sciences	8	3	4.04100270747181e-05
from the departments of biochemistry structural biology	14	3	4.04100270747181e-05
henan	6	3	4.04100270747181e-05
washington 98195-7350	5	3	4.04100270747181e-05
california 90089-2821	5	3	4.04100270747181e-05
division of biological sciences	7	3	4.04100270747181e-05
department of zoology	6	3	4.04100270747181e-05
division of endocrinology	5	3	4.04100270747181e-05
the department of chemistry biochemistry	7	3	4.04100270747181e-05
from the department of cell biology neuroscience	18	3	4.04100270747181e-05
from the department of molecular physiology biophysics	14	3	4.04100270747181e-05
division of infectious diseases	10	3	4.04100270747181e-05
from the school of chemistry biochemistry	12	3	4.04100270747181e-05
from the departments of molecular biosciences	13	3	4.04100270747181e-05
from the department of biotechnology	11	3	4.04100270747181e-05
21941-902 brazil	16	3	4.04100270747181e-05
hong kong special administrative region	4	3	4.04100270747181e-05
volen center for complex systems	8	3	4.04100270747181e-05
nsw	8	3	4.04100270747181e-05
institute of cognitive neuroscience	9	3	4.04100270747181e-05
huffington center on aging	5	3	4.04100270747181e-05
hotchkiss brain institute	9	3	4.04100270747181e-05
department of ophthalmology	8	3	4.04100270747181e-05
department of radiology biomedical research imaging center	8	3	4.04100270747181e-05
molecular behavioral neuroscience institute	9	3	4.04100270747181e-05
maryland 20892-4415	11	3	4.04100270747181e-05
351-0198 japan	5	3	4.04100270747181e-05
waisman center	18	3	4.04100270747181e-05
feil family brain mind research institute	18	3	4.04100270747181e-05
centre for neuroscience studies	4	3	4.04100270747181e-05
institute of psychopharmacology	8	3	4.04100270747181e-05
department of radiology	4	3	4.04100270747181e-05
department of experimental psychology	9	3	4.04100270747181e-05
brain research institute	4	3	4.04100270747181e-05
departments of anatomy neurobiology	9	3	4.04100270747181e-05
departments of psychological brain sciences	5	3	4.04100270747181e-05
princeton neuroscience institute	3	3	4.04100270747181e-05
sagol department of neurobiology	23	3	4.04100270747181e-05
departments of radiology	4	3	4.04100270747181e-05
departments of cell biology	5	3	4.04100270747181e-05
departments of biomedical engineering	5	3	4.04100270747181e-05
departments of otolaryngology	9	3	4.04100270747181e-05
california 94143-0444	5	3	4.04100270747181e-05
evelyn f. mcknight brain institute	9	3	4.04100270747181e-05
integrative center for learning memory	4	3	4.04100270747181e-05
department of molecular cellular physiology	9	3	4.04100270747181e-05
center for integrative neuroscience	9	3	4.04100270747181e-05
departments of molecular integrative physiology	11	3	4.04100270747181e-05
republic of guinea	4	3	4.04100270747181e-05
cambridge united kingdom	10	3	4.04100270747181e-05
co 80309-0347	7	3	4.04100270747181e-05
mi 48109-1048	15	3	4.04100270747181e-05
sd	10	3	4.04100270747181e-05
ct 06030-3305	4	3	4.04100270747181e-05
heidelberg germany	5	3	4.04100270747181e-05
new guinea	3	3	4.04100270747181e-05
liechtenstein	4	3	4.04100270747181e-05
aachen	4	3	4.04100270747181e-05
united state of america	7	3	4.04100270747181e-05
california united states of america	4	3	4.04100270747181e-05
ny united states of america	5	3	4.04100270747181e-05
république centrafricaine	10	3	4.04100270747181e-05
nc united states of america	20	3	4.04100270747181e-05
timor-leste	8	3	4.04100270747181e-05
cote d'ivoire	7	3	4.04100270747181e-05
vanuatu	10	3	4.04100270747181e-05
american samoa	7	3	4.04100270747181e-05
moçambique	6	3	4.04100270747181e-05
mauritania	5	2	2.69400180498121e-05
riyadh saudi arabia	2	2	2.69400180498121e-05
cologne germany	2	2	2.69400180498121e-05
republic of moldova	2	2	2.69400180498121e-05
belgique	2	2	2.69400180498121e-05
guam	3	2	2.69400180498121e-05
ᅟ	3	2	2.69400180498121e-05
hksar	2	2	2.69400180498121e-05
rok	2	2	2.69400180498121e-05
nr4 7uh	5	2	2.69400180498121e-05
department o	4	2	2.69400180498121e-05
division of computational biology	7	2	2.69400180498121e-05
in usa	5	2	2.69400180498121e-05
interdisciplinary program in statistics	3	2	2.69400180498121e-05
instituto de medicina molecular	9	2	2.69400180498121e-05
department of microbiology	4	2	2.69400180498121e-05
sagol school of neuroscience	3	2	2.69400180498121e-05
worcester	15	2	2.69400180498121e-05
bologna	4	2	2.69400180498121e-05
university of oxford	4	2	2.69400180498121e-05
school of life science	2	2	2.69400180498121e-05
london sw7 2az	3	2	2.69400180498121e-05
saarbrücken	6	2	2.69400180498121e-05
university of melbourne	5	2	2.69400180498121e-05
university of texas health science center at houston	5	2	2.69400180498121e-05
department of computer sciences	6	2	2.69400180498121e-05
university of leeds	8	2	2.69400180498121e-05
illinois usa	6	2	2.69400180498121e-05
university of hong kong	3	2	2.69400180498121e-05
center for computational molecular biology	3	2	2.69400180498121e-05
north carolina usa	2	2	2.69400180498121e-05
department of energy plant research laboratory	7	2	2.69400180498121e-05
leiden	6	2	2.69400180498121e-05
hematology medical oncology	2	2	2.69400180498121e-05
department of genetics genomic sciences	5	2	2.69400180498121e-05
frankfurt am main	9	2	2.69400180498121e-05
department of bioinformatics computational biology	3	2	2.69400180498121e-05
delaware biotechnology institute	2	2	2.69400180498121e-05
computational science research center	3	2	2.69400180498121e-05
department of biostatistics bioinformatics	6	2	2.69400180498121e-05
university of cambridge	2	2	2.69400180498121e-05
the republic of korea	8	2	2.69400180498121e-05
cemm research center for molecular medicine of the austrian academy of sciences	2	2	2.69400180498121e-05
lewis-sigler institute for integrative genomics	4	2	2.69400180498121e-05
department of computer engineering informatics	4	2	2.69400180498121e-05
montpellier	10	2	2.69400180498121e-05
science for life laboratory	6	2	2.69400180498121e-05
faculty of sciences	2	2	2.69400180498121e-05
institute of biophysics	8	2	2.69400180498121e-05
hinxton	7	2	2.69400180498121e-05
universidad de buenos aires	9	2	2.69400180498121e-05
novosibirsk	2	2	2.69400180498121e-05
division of theoretical bioinformatics	2	2	2.69400180498121e-05
epidemiology branch	3	2	2.69400180498121e-05
school of computer science	5	2	2.69400180498121e-05
center for systems biology	6	2	2.69400180498121e-05
department of electrical engineering	2	2	2.69400180498121e-05
department of preventive medicine	9	2	2.69400180498121e-05
school of computing science	6	2	2.69400180498121e-05
department of clinical experimental medicine	6	2	2.69400180498121e-05
curriculum in bioinformatics computational biology	3	2	2.69400180498121e-05
department of public health sciences	3	2	2.69400180498121e-05
anatomy genetics	2	2	2.69400180498121e-05
institute for human genetics	2	2	2.69400180498121e-05
school of information communication technology	7	2	2.69400180498121e-05
college of public health	3	2	2.69400180498121e-05
hong kong bioinformatics centre	3	2	2.69400180498121e-05
department of clinical sciences	3	2	2.69400180498121e-05
department of biomedicine	6	2	2.69400180498121e-05
genomics core facility	4	2	2.69400180498121e-05
center for individualized medicine	14	2	2.69400180498121e-05
faculty of chemistry chemical biology	10	2	2.69400180498121e-05
school of biosciences	5	2	2.69400180498121e-05
school of computing sciences	6	2	2.69400180498121e-05
department of applied mathematics statistics	3	2	2.69400180498121e-05
center for proteomics bioinformatics	4	2	2.69400180498121e-05
department of epidemiology biostatistics	6	2	2.69400180498121e-05
genome center	2	2	2.69400180498121e-05
department of immunology	5	2	2.69400180498121e-05
ontario institute for cancer research	7	2	2.69400180498121e-05
biostatistics bioinformatics	5	2	2.69400180498121e-05
faculty of information technology	5	2	2.69400180498121e-05
biocomplexity institute	2	2	2.69400180498121e-05
dan l. duncan cancer center	3	2	2.69400180498121e-05
department of health sciences research	3	2	2.69400180498121e-05
transfaculty research platform molecular cognitive neurosciences	9	2	2.69400180498121e-05
department of medical genetics	3	2	2.69400180498121e-05
organismal biology	4	2	2.69400180498121e-05
department of applied physics	5	2	2.69400180498121e-05
academy for advanced interdisciplinary studies	4	2	2.69400180498121e-05
department of veterinary integrative biosciences	2	2	2.69400180498121e-05
department of molecular biophysics biochemistry	4	2	2.69400180498121e-05
barbara ann karmanos cancer institute	4	2	2.69400180498121e-05
department of life sciences	14	2	2.69400180498121e-05
school of engineering	3	2	2.69400180498121e-05
university of oklahoma health sciences center	3	2	2.69400180498121e-05
bioinformatics systems biology graduate program	2	2	2.69400180498121e-05
department of medicinal chemistry	3	2	2.69400180498121e-05
university of manchester	3	2	2.69400180498121e-05
ontario	6	2	2.69400180498121e-05
rep. of korea	3	2	2.69400180498121e-05
wa 98195	2	2	2.69400180498121e-05
belize	3	2	2.69400180498121e-05
565-0871 japan	3	2	2.69400180498121e-05
canada n6a 5c1	5	2	2.69400180498121e-05
canada m5g 1l7	6	2	2.69400180498121e-05
canada v8w 3p6	11	2	2.69400180498121e-05
canada t6g 2e9	5	2	2.69400180498121e-05
canada b3h 4r2	4	2	2.69400180498121e-05
t2n 4n1	11	2	2.69400180498121e-05
canada m5g 1x8	2	2	2.69400180498121e-05
canada r3t 2n2	2	2	2.69400180498121e-05
h2w 1r7 canada	12	2	2.69400180498121e-05
united sates	3	2	2.69400180498121e-05
chicago	3	2	2.69400180498121e-05
south america	2	2	2.69400180498121e-05
köln	2	2	2.69400180498121e-05
02125	2	2	2.69400180498121e-05
14853-2701	2	2	2.69400180498121e-05
20742	2	2	2.69400180498121e-05
48824	4	2	2.69400180498121e-05
06269-3043	4	2	2.69400180498121e-05
valdivia	7	2	2.69400180498121e-05
59812	2	2	2.69400180498121e-05
lawrence	2	2	2.69400180498121e-05
47907	2	2	2.69400180498121e-05
m5s 2c6	2	2	2.69400180498121e-05
92697	2	2	2.69400180498121e-05
n1g 2w1	2	2	2.69400180498121e-05
19104	3	2	2.69400180498121e-05
b3h 4r2	2	2	2.69400180498121e-05
95616	2	2	2.69400180498121e-05
22904	2	2	2.69400180498121e-05
10024	3	2	2.69400180498121e-05
14850	2	2	2.69400180498121e-05
85721	2	2	2.69400180498121e-05
30322	2	2	2.69400180498121e-05
48103	2	2	2.69400180498121e-05
98195	2	2	2.69400180498121e-05
11794	2	2	2.69400180498121e-05
85287	2	2	2.69400180498121e-05
32611	2	2	2.69400180498121e-05
43210	2	2	2.69400180498121e-05
27599-3280	2	2	2.69400180498121e-05
08544	2	2	2.69400180498121e-05
37996-1610	3	2	2.69400180498121e-05
sweden 07	8	2	2.69400180498121e-05
california 90089-0371	4	2	2.69400180498121e-05
nebraska 68583-0963	2	2	2.69400180498121e-05
m5g 0a4 canada	9	2	2.69400180498121e-05
411-8540 japan	2	2	2.69400180498121e-05
tennessee 37240-7935	8	2	2.69400180498121e-05
sa australia	2	2	2.69400180498121e-05
madison wisconsin	11	2	2.69400180498121e-05
puerto rico 00960-6032	2	2	2.69400180498121e-05
florida 32610-0266	4	2	2.69400180498121e-05
n6a 5b7	4	2	2.69400180498121e-05
california 91010-3000	5	2	2.69400180498121e-05
ontario m5s 3e1	4	2	2.69400180498121e-05
california 94305-5120	3	2	2.69400180498121e-05
california 92093-0359	5	2	2.69400180498121e-05
new jersey 08544-1014	4	2	2.69400180498121e-05
new york 12201-0509	6	2	2.69400180498121e-05
north carolina 27695-7620	3	2	2.69400180498121e-05
california 92697-2525	5	2	2.69400180498121e-05
stuttgart	5	2	2.69400180498121e-05
department of molecular genetics	5	2	2.69400180498121e-05
department of molecular biology	2	2	2.69400180498121e-05
j1k 2r1	2	2	2.69400180498121e-05
graduate school of life environmental sciences	12	2	2.69400180498121e-05
department of medical biochemistry biophysics	3	2	2.69400180498121e-05
tempe az 85287-4501	8	2	2.69400180498121e-05
904-0495	3	2	2.69400180498121e-05
t6g 2r3	5	2	2.69400180498121e-05
japan 240-0193	4	2	2.69400180498121e-05
division of cardiology	16	2	2.69400180498121e-05
california 94720-3204	4	2	2.69400180498121e-05
korea 120-750	3	2	2.69400180498121e-05
newyork	4	2	2.69400180498121e-05
california 94158-2200	2	2	2.69400180498121e-05
california 94143-0794	10	2	2.69400180498121e-05
california 94612-2304	39	2	2.69400180498121e-05
north carolina 27708-0338	8	2	2.69400180498121e-05
washington 98109-1024	9	2	2.69400180498121e-05
new jersey 08854-5635	6	2	2.69400180498121e-05
new jersey 08903-2681	2	2	2.69400180498121e-05
the chinese university of hong kong	9	2	2.69400180498121e-05
the university of hong kong	5	2	2.69400180498121e-05
wisconsin 53706-1544	12	2	2.69400180498121e-05
connecticut 06520-8114	6	2	2.69400180498121e-05
utah 84112-0840	7	2	2.69400180498121e-05
texas 77204-5001	3	2	2.69400180498121e-05
north carolina 27695-7613	2	2	2.69400180498121e-05
florida 32306-4300	6	2	2.69400180498121e-05
france. equipe labellisée ligue	4	2	2.69400180498121e-05
washington 98195-5065	8	2	2.69400180498121e-05
ohio 45229-3026	8	2	2.69400180498121e-05
department of anesthesiology perioperative medicine	5	2	2.69400180498121e-05
fi-40014 finland	4	2	2.69400180498121e-05
eh25 9rg uk	2	2	2.69400180498121e-05
maryland 20892-0830	8	2	2.69400180498121e-05
illinois 61801-4730	8	2	2.69400180498121e-05
university of toledo	12	2	2.69400180498121e-05
university at buffalo	5	2	2.69400180498121e-05
university of california berkeley	3	2	2.69400180498121e-05
drexel university college of medicine	2	2	2.69400180498121e-05
university of cincinnati college of medicine	7	2	2.69400180498121e-05
knoxville	9	2	2.69400180498121e-05
the state university of new jersey	3	2	2.69400180498121e-05
lowell	5	2	2.69400180498121e-05
rome italy	3	2	2.69400180498121e-05
the george washington university	4	2	2.69400180498121e-05
manoa	2	2	2.69400180498121e-05
missoula	3	2	2.69400180498121e-05
kansas state university	3	2	2.69400180498121e-05
the university of arizona	9	2	2.69400180498121e-05
tempe	4	2	2.69400180498121e-05
washington university	2	2	2.69400180498121e-05
piscataway	2	2	2.69400180498121e-05
columbus	2	2	2.69400180498121e-05
rice university	7	2	2.69400180498121e-05
johns hopkins university	2	2	2.69400180498121e-05
ft lauderdale	2	2	2.69400180498121e-05
university of delaware	5	2	2.69400180498121e-05
stony brook university	5	2	2.69400180498121e-05
brigham young university	5	2	2.69400180498121e-05
nice france	9	2	2.69400180498121e-05
florida international university	5	2	2.69400180498121e-05
university of massachusetts medical school	8	2	2.69400180498121e-05
university of hawaii at manoa	6	2	2.69400180498121e-05
northwestern state university of louisiana	2	2	2.69400180498121e-05
maryland usa	4	2	2.69400180498121e-05
santa cruz	5	2	2.69400180498121e-05
urbana	2	2	2.69400180498121e-05
university of california irvine	10	2	2.69400180498121e-05
provo	2	2	2.69400180498121e-05
university of vermont	2	2	2.69400180498121e-05
new york university school of medicine	2	2	2.69400180498121e-05
university of nebraska	2	2	2.69400180498121e-05
houston	8	2	2.69400180498121e-05
oakland university	4	2	2.69400180498121e-05
la jolla	2	2	2.69400180498121e-05
denver	3	2	2.69400180498121e-05
university of tennessee	2	2	2.69400180498121e-05
moscow	12	2	2.69400180498121e-05
thailand)	5	2	2.69400180498121e-05
canada v5z 1m9	2	2	2.69400180498121e-05
904-0495 japan	2	2	2.69400180498121e-05
wa australia	2	2	2.69400180498121e-05
florida usa	5	2	2.69400180498121e-05
shenzhen china	10	2	2.69400180498121e-05
western australia australia	4	2	2.69400180498121e-05
california usa	4	2	2.69400180498121e-05
tasmania australia	7	2	2.69400180498121e-05
south australia australia	9	2	2.69400180498121e-05
cape town south africa	7	2	2.69400180498121e-05
bizkaia spain	2	2	2.69400180498121e-05
northern cyprus	5	2	2.69400180498121e-05
yunnan china	5	2	2.69400180498121e-05
australian capital territory australia	4	2	2.69400180498121e-05
south australia	10	2	2.69400180498121e-05
h3c 3j7	3	2	2.69400180498121e-05
changsha	10	2	2.69400180498121e-05
university of helsinki	4	2	2.69400180498121e-05
kingdom of bahrain	2	2	2.69400180498121e-05
curaçao	3	2	2.69400180498121e-05
center for cardiovascular diagnostics prevention	15	2	2.69400180498121e-05
from the department of molecular experimental medicine	7	2	2.69400180498121e-05
connecticut 06520-8020	6	2	2.69400180498121e-05
quebec h3a 1a3	2	2	2.69400180498121e-05
quebec h4p 2r2	4	2	2.69400180498121e-05
sidney kimmel cancer center	7	2	2.69400180498121e-05
from the queensland brain institute	6	2	2.69400180498121e-05
the departments of biology	5	2	2.69400180498121e-05
the department of microbiology	2	2	2.69400180498121e-05
center for insoluble protein structures (inspin)	5	2	2.69400180498121e-05
atlanta	6	2	2.69400180498121e-05
dresden	4	2	2.69400180498121e-05
from the departments of metabolic medicine	12	2	2.69400180498121e-05
osaka	2	2	2.69400180498121e-05
hospital for special surgery	3	2	2.69400180498121e-05
pharmaceutical sciences	5	2	2.69400180498121e-05
translational molecular pathology	4	2	2.69400180498121e-05
texas 75390-8816	7	2	2.69400180498121e-05
section on molecular medicine	8	2	2.69400180498121e-05
college of chemistry molecular engineering	3	2	2.69400180498121e-05
tennessee 37232-6303	4	2	2.69400180498121e-05
york yo10 5dd	8	2	2.69400180498121e-05
steele children's research center	10	2	2.69400180498121e-05
biodesign institute	3	2	2.69400180498121e-05
from the departments of biochemistry cell biology	9	2	2.69400180498121e-05
from the departments of anesthesiology critical care	2	2	2.69400180498121e-05
from the departments of molecular biology	9	2	2.69400180498121e-05
oral maxillofacial surgery	6	2	2.69400180498121e-05
from the department of chemical biomolecular engineering	7	2	2.69400180498121e-05
california 90089-9176	6	2	2.69400180498121e-05
california 92093-0322	8	2	2.69400180498121e-05
tokyo 113-8510	3	2	2.69400180498121e-05
from the department of cellular integrative physiology	3	2	2.69400180498121e-05
faculty of science engineering	6	2	2.69400180498121e-05
from the graduate school of frontier biosciences	2	2	2.69400180498121e-05
photon science	6	2	2.69400180498121e-05
school of molecular biosciences	7	2	2.69400180498121e-05
from the department of cellular molecular medicine	5	2	2.69400180498121e-05
from the department of pharmacology experimental neuroscience	3	2	2.69400180498121e-05
bilbao	5	2	2.69400180498121e-05
virginia 23298-0614	15	2	2.69400180498121e-05
critical care medicine	6	2	2.69400180498121e-05
michigan 48109-2216	3	2	2.69400180498121e-05
the school of biological sciences	7	2	2.69400180498121e-05
acute lung injury center of excellence	15	2	2.69400180498121e-05
from the division of molecular microbiology	4	2	2.69400180498121e-05
division of cardiovascular medicine	4	2	2.69400180498121e-05
the fakultät für biologie	2	2	2.69400180498121e-05
the florey institute of neuroscience mental health	3	2	2.69400180498121e-05
tokyo 102-0076	5	2	2.69400180498121e-05
the departments of molecular cell biology	4	2	2.69400180498121e-05
the school of biomedical sciences	6	2	2.69400180498121e-05
the department of biochemistry molecular genetics	3	2	2.69400180498121e-05
chennai	10	2	2.69400180498121e-05
from the department of immunology	15	2	2.69400180498121e-05
812-8582	5	2	2.69400180498121e-05
tokyo 104-0045	5	2	2.69400180498121e-05
departments of orthopedic surgery	4	2	2.69400180498121e-05
the department of molecular cell biology	7	2	2.69400180498121e-05
school of dentistry	8	2	2.69400180498121e-05
from the monash institute of pharmaceutical sciences	5	2	2.69400180498121e-05
washington 99164-6340	9	2	2.69400180498121e-05
new york 11794-8661	6	2	2.69400180498121e-05
fukuoka 812-8581	13	2	2.69400180498121e-05
miyagi 980-8578	7	2	2.69400180498121e-05
from the department of molecular cellular biochemistry	9	2	2.69400180498121e-05
colleges of life sciences	12	2	2.69400180498121e-05
global discovery chemistry	13	2	2.69400180498121e-05
california 93106-5100	6	2	2.69400180498121e-05
california 93106-9610	7	2	2.69400180498121e-05
hangzhou	3	2	2.69400180498121e-05
ohio 45229-3039	3	2	2.69400180498121e-05
quebec j1h 5n4	3	2	2.69400180498121e-05
minneapolis minnesota	10	2	2.69400180498121e-05
düsseldorf	13	2	2.69400180498121e-05
from the key laboratory of aquatic biodiversity conservation	13	2	2.69400180498121e-05
mallinckrodt institute of radiology	2	2	2.69400180498121e-05
missouri 63110-1093	3	2	2.69400180498121e-05
from the department of orthopedic surgery	12	2	2.69400180498121e-05
mayo graduate school	2	2	2.69400180498121e-05
from the department of biochemistry molecular genetics	10	2	2.69400180498121e-05
606-8507	4	2	2.69400180498121e-05
981-8558	7	2	2.69400180498121e-05
national university of singapore	3	2	2.69400180498121e-05
sichuan	2	2	2.69400180498121e-05
massachusetts 02115-5000	8	2	2.69400180498121e-05
utah 84112-5330	2	2	2.69400180498121e-05
rehabilitation medicine	3	2	2.69400180498121e-05
musculoskeletal reconstruction regeneration surgery	3	2	2.69400180498121e-05
division of advanced prosthodontics	3	2	2.69400180498121e-05
from the division of cell biology	11	2	2.69400180498121e-05
the departments of microbiology	6	2	2.69400180498121e-05
university of arkansas for medical sciences	2	2	2.69400180498121e-05
the division of hematology	7	2	2.69400180498121e-05
from the department of oncology	4	2	2.69400180498121e-05
the department of molecular biology genetics	5	2	2.69400180498121e-05
the school of biochemistry	7	2	2.69400180498121e-05
washington 99164-4660	4	2	2.69400180498121e-05
washington 99164-4630	5	2	2.69400180498121e-05
the department of medical oncology	2	2	2.69400180498121e-05
endocrine discovery	14	2	2.69400180498121e-05
the department of anatomy cell biology	4	2	2.69400180498121e-05
research institute for microbial diseases	5	2	2.69400180498121e-05
the departments of chemistry biochemistry	7	2	2.69400180498121e-05
institute of systems neuroscience	2	2	2.69400180498121e-05
from the departments of laboratory medicine pathobiology	8	2	2.69400180498121e-05
from the departments of pathobiology	11	2	2.69400180498121e-05
from the departments of biosciences	15	2	2.69400180498121e-05
ontario m5g 1x8	3	2	2.69400180498121e-05
dk-2200 copenhagen n	12	2	2.69400180498121e-05
borstel	5	2	2.69400180498121e-05
columbus ohio	8	2	2.69400180498121e-05
center for matrix biology	3	2	2.69400180498121e-05
from the robarts research institute	5	2	2.69400180498121e-05
the biophysical sciences institute	8	2	2.69400180498121e-05
from the departments of cell developmental biology	6	2	2.69400180498121e-05
california 92093-0654	3	2	2.69400180498121e-05
se-40530 gothenburg	4	2	2.69400180498121e-05
section of dermatology	11	2	2.69400180498121e-05
pathobiology	6	2	2.69400180498121e-05
the departments of biomedical engineering	5	2	2.69400180498121e-05
university of zurich	4	2	2.69400180498121e-05
from the goodman cancer research centre	7	2	2.69400180498121e-05
beijing nuclear magnetic resonance center	9	2	2.69400180498121e-05
from the college of chemistry molecular engineering	6	2	2.69400180498121e-05
sealy center for molecular medicine	13	2	2.69400180498121e-05
from the vascular biology center	8	2	2.69400180498121e-05
química teórica y computacional	4	2	2.69400180498121e-05
facultad de ciencias	2	2	2.69400180498121e-05
quebec h4a 3j1	8	2	2.69400180498121e-05
protein chemistry	7	2	2.69400180498121e-05
the departments of cardiology	3	2	2.69400180498121e-05
grosshadern medical center	9	2	2.69400180498121e-05
from the department of molecular integrative physiology	7	2	2.69400180498121e-05
department of microbiology molecular genetics	2	2	2.69400180498121e-05
the department of microbiology molecular genetics	2	2	2.69400180498121e-05
the departments of microbiology immunology	2	2	2.69400180498121e-05
biophysical sciences institute	12	2	2.69400180498121e-05
davis heart lung research institute	11	2	2.69400180498121e-05
allergy critical care medicine	12	2	2.69400180498121e-05
atlanta georgia	5	2	2.69400180498121e-05
from the genomics research center	4	2	2.69400180498121e-05
karnataka	5	2	2.69400180498121e-05
from the department of materials science engineering	5	2	2.69400180498121e-05
montpellier cedex	13	2	2.69400180498121e-05
harbin	18	2	2.69400180498121e-05
radcliffe department of medicine	7	2	2.69400180498121e-05
school of pharmacy	9	2	2.69400180498121e-05
from the center for tropical emerging global diseases	13	2	2.69400180498121e-05
departments of molecular cellular biochemistry	5	2	2.69400180498121e-05
colorado 80217-3364	13	2	2.69400180498121e-05
departments of microbiology	19	2	2.69400180498121e-05
emergency medicine	2	2	2.69400180498121e-05
the academy of scientific innovative research	7	2	2.69400180498121e-05
systems toxicology health risk assessment group	3	2	2.69400180498121e-05
lks faculty of medicine	2	2	2.69400180498121e-05
from the department of microbiology molecular genetics	5	2	2.69400180498121e-05
departments of internal medicine	9	2	2.69400180498121e-05
parasitology	10	2	2.69400180498121e-05
behavior	2	2	2.69400180498121e-05
california 92182-4614	6	2	2.69400180498121e-05
ilinois	8	2	2.69400180498121e-05
from the institutes of molecular cell biology	6	2	2.69400180498121e-05
the departments of anatomy neuroscience	2	2	2.69400180498121e-05
jewish general hospital	4	2	2.69400180498121e-05
college of life science	4	2	2.69400180498121e-05
microbiology	4	2	2.69400180498121e-05
antibody engineering	7	2	2.69400180498121e-05
bioanalytical sciences	4	2	2.69400180498121e-05
osaka 567-0085	4	2	2.69400180498121e-05
cell molecular biology	6	2	2.69400180498121e-05
morsani college of medicine	3	2	2.69400180498121e-05
the departments of biochemistry biophysics	2	2	2.69400180498121e-05
yunnan	7	2	2.69400180498121e-05
molecular medicine	2	2	2.69400180498121e-05
montana 59715-3400	10	2	2.69400180498121e-05
from the departments of molecular pharmacology experimental therapeutics	6	2	2.69400180498121e-05
hsinchu	2	2	2.69400180498121e-05
nuthetal	5	2	2.69400180498121e-05
facultad de química	10	2	2.69400180498121e-05
from the keenan research centre for biomedical science of the st. michael's hospital	12	2	2.69400180498121e-05
australian capital territory	6	2	2.69400180498121e-05
department of oral health development sciences	14	2	2.69400180498121e-05
munich	18	2	2.69400180498121e-05
pécs h-7624	9	2	2.69400180498121e-05
szeged h-6726	6	2	2.69400180498121e-05
life science research center	3	2	2.69400180498121e-05
feinberg school of medicine	11	2	2.69400180498121e-05
the centre for blood research	4	2	2.69400180498121e-05
from the department of biomedical engineering	5	2	2.69400180498121e-05
the medical scientist training program	2	2	2.69400180498121e-05
school of integrative global majors	3	2	2.69400180498121e-05
the departments of civil environmental engineering	4	2	2.69400180498121e-05
wake forest school of medicine	2	2	2.69400180498121e-05
leeds ls2 9jt	9	2	2.69400180498121e-05
nottingham ng7 2rd	6	2	2.69400180498121e-05
developmental biology program	4	2	2.69400180498121e-05
from the departments of biochemistry molecular genetics	5	2	2.69400180498121e-05
from the national laboratory of biomacromolecules	10	2	2.69400180498121e-05
sapporo 060-8628	4	2	2.69400180498121e-05
the department of pathology laboratory medicine	7	2	2.69400180498121e-05
from the florey institute of neuroscience mental health	8	2	2.69400180498121e-05
college of pharmacy pharmaceutical sciences	15	2	2.69400180498121e-05
thrombosis research	16	2	2.69400180498121e-05
the departments of pathology	4	2	2.69400180498121e-05
florida 32610-0267	6	2	2.69400180498121e-05
center for molecular medicine	4	2	2.69400180498121e-05
british columbia v6t 1z4	5	2	2.69400180498121e-05
from the departments of pathology & laboratory medicine	3	2	2.69400180498121e-05
from the program in molecular cellular biology	7	2	2.69400180498121e-05
from the departments of bioorganic chemistry	6	2	2.69400180498121e-05
molecular oncology	2	2	2.69400180498121e-05
gerstner sloan kettering graduate school of biomedical sciences	2	2	2.69400180498121e-05
from the cell biology program	3	2	2.69400180498121e-05
from the institute for molecular microbiology biotechnology	6	2	2.69400180498121e-05
graduate school of life science	2	2	2.69400180498121e-05
division of neonatology	5	2	2.69400180498121e-05
karnataka india	2	2	2.69400180498121e-05
from the laboratory of cellular molecular biology	8	2	2.69400180498121e-05
the departments of oncology	5	2	2.69400180498121e-05
eunice kennedy shriver nichd	3	2	2.69400180498121e-05
guangdong	25	2	2.69400180498121e-05
nebraska 68588-0664	7	2	2.69400180498121e-05
biochemistry molecular genetics	2	2	2.69400180498121e-05
departments of molecular genetics	2	2	2.69400180498121e-05
from the departments of molecular genetics internal medicine	5	2	2.69400180498121e-05
from the institute for molecular bioscience	15	2	2.69400180498121e-05
the wellcome trust centre for cell-matrix research	6	2	2.69400180498121e-05
marburg	3	2	2.69400180498121e-05
68588-0664	11	2	2.69400180498121e-05
from the genetics of development disease branch	15	2	2.69400180498121e-05
the center for proteomics metabolomics	5	2	2.69400180498121e-05
the department of biology	4	2	2.69400180498121e-05
case comprehensive cancer center	8	2	2.69400180498121e-05
from the department of orthopaedic surgery	3	2	2.69400180498121e-05
division of biology biomedical sciences	3	2	2.69400180498121e-05
faculdade de farmácia	13	2	2.69400180498121e-05
the department of biochemistry biophysics	6	2	2.69400180498121e-05
department of food science technology	5	2	2.69400180498121e-05
from the national institute of immunology	9	2	2.69400180498121e-05
the departments of biochemistry molecular genetics	5	2	2.69400180498121e-05
from the program in molecular medicine	19	2	2.69400180498121e-05
immunology molecular genetics	2	2	2.69400180498121e-05
from the curriculum in genetics molecular biology	5	2	2.69400180498121e-05
from the college of life sciences	14	2	2.69400180498121e-05
from the department of molecular biosciences	9	2	2.69400180498121e-05
institute of science	3	2	2.69400180498121e-05
germany.	3	2	2.69400180498121e-05
prime	2	2	2.69400180498121e-05
tokyo 192-0397	7	2	2.69400180498121e-05
center for molecular medicine genetics	5	2	2.69400180498121e-05
umr	14	2	2.69400180498121e-05
from the departments of pharmacology cell biophysics	2	2	2.69400180498121e-05
d-13125 berlin	6	2	2.69400180498121e-05
biotechnology	4	2	2.69400180498121e-05
osaka 569-8686	4	2	2.69400180498121e-05
hyderabad	7	2	2.69400180498121e-05
colorado 80523-1682	11	2	2.69400180498121e-05
from the departments of chemical engineering	7	2	2.69400180498121e-05
chemistry biochemistry	3	2	2.69400180498121e-05
from the departments of molecular biology biochemistry	8	2	2.69400180498121e-05
california 93106-9625	10	2	2.69400180498121e-05
case western reserve university	6	2	2.69400180498121e-05
d-38106 braunschweig	7	2	2.69400180498121e-05
from the centre for chemical biology	9	2	2.69400180498121e-05
tennessee 37240-7915	3	2	2.69400180498121e-05
münster germany	2	2	2.69400180498121e-05
ch utrecht	14	2	2.69400180498121e-05
cancer biology graduate program	3	2	2.69400180498121e-05
departments of biochemistry molecular biology	6	2	2.69400180498121e-05
from the department of pharmacology therapeutics	6	2	2.69400180498121e-05
kyoto 615-8510	6	2	2.69400180498121e-05
27695-7905	5	2	2.69400180498121e-05
tennessee 37232-0615	3	2	2.69400180498121e-05
vanderbilt university medical center	2	2	2.69400180498121e-05
from the departments of gastroenterology hepatology	7	2	2.69400180498121e-05
from the picobiology institute	16	2	2.69400180498121e-05
hyogo 678-1297	2	2	2.69400180498121e-05
british columbia v6t 1z3	6	2	2.69400180498121e-05
from the masonic cancer center	9	2	2.69400180498121e-05
the department of pharmacology toxicology	6	2	2.69400180498121e-05
from the department of biomolecular sciences	11	2	2.69400180498121e-05
from the center for molecular medicine genetics	14	2	2.69400180498121e-05
integrative biology	8	2	2.69400180498121e-05
center for free radical biology	2	2	2.69400180498121e-05
from the department of biophysics	8	2	2.69400180498121e-05
the department of biomedicine	5	2	2.69400180498121e-05
chongqing	12	2	2.69400180498121e-05
department of physiology & pharmacology	5	2	2.69400180498121e-05
kentucky 40536-0509	4	2	2.69400180498121e-05
biomedical sciences graduate program	6	2	2.69400180498121e-05
michigan 48201-2013	12	2	2.69400180498121e-05
biomedical sciences	7	2	2.69400180498121e-05
chiba 260-8675	3	2	2.69400180498121e-05
california 92093-0671	16	2	2.69400180498121e-05
quebec h3a 0c7	3	2	2.69400180498121e-05
suzhou	14	2	2.69400180498121e-05
from the institute of biochemistry molecular medicine	5	2	2.69400180498121e-05
the departments of dermatology	3	2	2.69400180498121e-05
quebec h2w 1r7	6	2	2.69400180498121e-05
tokyo 105-8512	8	2	2.69400180498121e-05
from the food biochemistry laboratory	12	2	2.69400180498121e-05
tokyo 153-8904	2	2	2.69400180498121e-05
the school of medicine	2	2	2.69400180498121e-05
medical institute of bioregulation	9	2	2.69400180498121e-05
grenoble	35	2	2.69400180498121e-05
cardiovascular research center	8	2	2.69400180498121e-05
kumamoto 862-0973	9	2	2.69400180498121e-05
texas 77082-3101	2	2	2.69400180498121e-05
school of chemistry & molecular biosciences	19	2	2.69400180498121e-05
arkansas 72205-7199	8	2	2.69400180498121e-05
kentucky 40536-0298	6	2	2.69400180498121e-05
okayama 700-8530	14	2	2.69400180498121e-05
from the departments of molecular biology genetics	10	2	2.69400180498121e-05
california 92697-3900	9	2	2.69400180498121e-05
villenave d'ornon	2	2	2.69400180498121e-05
from the center for retrovirus research	7	2	2.69400180498121e-05
stem cell regenerative biology	7	2	2.69400180498121e-05
from the departments of molecular genetics microbiology	8	2	2.69400180498121e-05
eshelman school of pharmacy	6	2	2.69400180498121e-05
bangkok	3	2	2.69400180498121e-05
the departments of physics	9	2	2.69400180498121e-05
new delhi-110067	9	2	2.69400180498121e-05
d. c.	5	2	2.69400180498121e-05
baker laboratory	7	2	2.69400180498121e-05
the biotechnology center	5	2	2.69400180498121e-05
from the laboratory of drosophila research	10	2	2.69400180498121e-05
from the department of neuropathology	7	2	2.69400180498121e-05
the departments of medical biology	11	2	2.69400180498121e-05
institute for advanced study	2	2	2.69400180498121e-05
from the w.m. keck center for transgene research	12	2	2.69400180498121e-05
from the institute of medical biochemistry leopoldo de meis	18	2	2.69400180498121e-05
institute of biophysics carlos chagas filho	6	2	2.69400180498121e-05
chemical biological engineering	4	2	2.69400180498121e-05
georgia 30332-0230	4	2	2.69400180498121e-05
the departments of psychiatry	4	2	2.69400180498121e-05
saitama 332-0012	2	2	2.69400180498121e-05
faculty of dental science	5	2	2.69400180498121e-05
kumamoto 860-8556	10	2	2.69400180498121e-05
maryland 20892-0301	10	2	2.69400180498121e-05
from the departments of biochemistry biophysics	8	2	2.69400180498121e-05
from the department of neurology	10	2	2.69400180498121e-05
alabama 35294-0006	2	2	2.69400180498121e-05
from the center for biophysics quantitative biology	4	2	2.69400180498121e-05
division of pulmonary critical care medicine	5	2	2.69400180498121e-05
kyoto 610-0394	2	2	2.69400180498121e-05
from the high pressure synchrotron radiation physics division	10	2	2.69400180498121e-05
from the departments of mechanical engineering	4	2	2.69400180498121e-05
from the départements de pharmacologie et physiologie	7	2	2.69400180498121e-05
from the departments of molecular microbiology	4	2	2.69400180498121e-05
tennessee 37232-6602	5	2	2.69400180498121e-05
from the central european institute of technology	20	2	2.69400180498121e-05
from the department of oncological sciences	10	2	2.69400180498121e-05
the graduate school of biomedical sciences	3	2	2.69400180498121e-05
department of dermatology	2	2	2.69400180498121e-05
hiroshima 734-8551	9	2	2.69400180498121e-05
miyazaki 889-1692	4	2	2.69400180498121e-05
nutrition	7	2	2.69400180498121e-05
tokyo 162-8655	13	2	2.69400180498121e-05
akita 010-8543	6	2	2.69400180498121e-05
the departments of lipid science	2	2	2.69400180498121e-05
cognition behaviour	8	2	2.69400180498121e-05
translational bioinformatics group	5	2	2.69400180498121e-05
cambridge cb2 0qq	7	2	2.69400180498121e-05
from the biomedical sciences graduate program	2	2	2.69400180498121e-05
the departments of pediatrics	6	2	2.69400180498121e-05
center for cell gene therapy	6	2	2.69400180498121e-05
maryland 20878-2204	12	2	2.69400180498121e-05
the department of neuroscience	3	2	2.69400180498121e-05
tokyo 135-0064	8	2	2.69400180498121e-05
from the instituto de investigação e inovação em saúde (i3s)	13	2	2.69400180498121e-05
department of physiology cell biology	7	2	2.69400180498121e-05
zhejiang	6	2	2.69400180498121e-05
from the program in biophysics	6	2	2.69400180498121e-05
from the department of biosciences	9	2	2.69400180498121e-05
the complex carbohydrate research center	13	2	2.69400180498121e-05
kobe 657-8501	6	2	2.69400180498121e-05
departments of biological sciences	7	2	2.69400180498121e-05
sendai 980-8578	13	2	2.69400180498121e-05
new york 10461-1926	6	2	2.69400180498121e-05
from the departments of structural biology	4	2	2.69400180498121e-05
from the departments of biochemistry of neurodegenerative diseases	9	2	2.69400180498121e-05
from the departments of pharmaceutics	14	2	2.69400180498121e-05
from the division of pulmonary critical care medicine	15	2	2.69400180498121e-05
from the program in chemical biology	6	2	2.69400180498121e-05
stein eye institute	9	2	2.69400180498121e-05
from the department of neurobiology	5	2	2.69400180498121e-05
from the divisions of cell biology	12	2	2.69400180498121e-05
kobe 650-0047	3	2	2.69400180498121e-05
university of illinois at chicago	4	2	2.69400180498121e-05
the center for translational research in neurodegenerative disease	13	2	2.69400180498121e-05
barcelona	8	2	2.69400180498121e-05
north carolina 27599-7365	4	2	2.69400180498121e-05
washington 98195-7610	5	2	2.69400180498121e-05
the department of microbiology immunology	4	2	2.69400180498121e-05
departments of physiology pharmacology	11	2	2.69400180498121e-05
from the departments of pharmacology physiology	6	2	2.69400180498121e-05
from the wisconsin energy institute	19	2	2.69400180498121e-05
the department of energy great lakes bioenergy research center	21	2	2.69400180498121e-05
civil environmental engineering	2	2	2.69400180498121e-05
from the school of molecular cellular biology	13	2	2.69400180498121e-05
from the center for rna biology	8	2	2.69400180498121e-05
ucla-doe institute of genomics proteomics	7	2	2.69400180498121e-05
chemical biomolecular engineering	2	2	2.69400180498121e-05
larner college of medicine	9	2	2.69400180498121e-05
connecticut 06520-8024	3	2	2.69400180498121e-05
department of medical microbiology immunology	4	2	2.69400180498121e-05
departments of regenerative medicine	5	2	2.69400180498121e-05
yale university school of medicine	4	2	2.69400180498121e-05
school of basic medical sciences	15	2	2.69400180498121e-05
the structural genomics consortium	6	2	2.69400180498121e-05
facultad de medicina	10	2	2.69400180498121e-05
ontario m5s 3e5	3	2	2.69400180498121e-05
gangwon-do	5	2	2.69400180498121e-05
from the departments of medicinal chemistry	4	2	2.69400180498121e-05
microbiology molecular genetics	2	2	2.69400180498121e-05
koch institute for integrative cancer research	4	2	2.69400180498121e-05
graduate school of biomedical engineering	4	2	2.69400180498121e-05
neurological surgery	4	2	2.69400180498121e-05
anatomy cell biology	3	2	2.69400180498121e-05
national human genome research institute	10	2	2.69400180498121e-05
chicago il	8	2	2.69400180498121e-05
anatomy neurobiology	2	2	2.69400180498121e-05
institute of psychology	6	2	2.69400180498121e-05
graduate college of biomedical sciences	7	2	2.69400180498121e-05
departments of anatomy	12	2	2.69400180498121e-05
neurosciences program	3	2	2.69400180498121e-05
department of clinical neurosciences	6	2	2.69400180498121e-05
department of neuroscience physiology	5	2	2.69400180498121e-05
department of neurologic surgery	8	2	2.69400180498121e-05
california 90095-1763	5	2	2.69400180498121e-05
departments of anatomy cell biology	8	2	2.69400180498121e-05
california 92093-0624	18	2	2.69400180498121e-05
department of oral maxillofacial surgery	8	2	2.69400180498121e-05
amsterdam brain cognition	3	2	2.69400180498121e-05
institute of molecular medicine	4	2	2.69400180498121e-05
department of psychology neuroscience	6	2	2.69400180498121e-05
department of radiology biomedical imaging	13	2	2.69400180498121e-05
brown foundation institute of molecular medicine	8	2	2.69400180498121e-05
alan edwards centre for research on pain	4	2	2.69400180498121e-05
neurology neurosurgery	3	2	2.69400180498121e-05
turku pet centre	10	2	2.69400180498121e-05
institute for neural computation	2	2	2.69400180498121e-05
f-75005 france	5	2	2.69400180498121e-05
dana-farber cancer institute	2	2	2.69400180498121e-05
australian institute for bioengineering nanotechnology	4	2	2.69400180498121e-05
department of cell systems biology	8	2	2.69400180498121e-05
departments of comparative medicine	4	2	2.69400180498121e-05
international collaboration on repair discoveries	14	2	2.69400180498121e-05
maryland 20892-3702	10	2	2.69400180498121e-05
downstate medical center	8	2	2.69400180498121e-05
neuroscience research center	10	2	2.69400180498121e-05
neurobiology anatomy	3	2	2.69400180498121e-05
department of integrative biology physiology	6	2	2.69400180498121e-05
center for learning memory	10	2	2.69400180498121e-05
department of epileptology	6	2	2.69400180498121e-05
center for neuroscience at the university of pittsburgh	4	2	2.69400180498121e-05
vanderbilt brain institute	3	2	2.69400180498121e-05
dominick p. purpura department of neuroscience	9	2	2.69400180498121e-05
division of pediatric neurology	5	2	2.69400180498121e-05
fennsi group	6	2	2.69400180498121e-05
department of psychiatry psychotherapy	5	2	2.69400180498121e-05
canada h3a2b4	6	2	2.69400180498121e-05
departments of neurosurgery	11	2	2.69400180498121e-05
graduate school of biomedical sciences	8	2	2.69400180498121e-05
friedman brain institute	5	2	2.69400180498121e-05
departments of anesthesiology	5	2	2.69400180498121e-05
canada t6g 2e1	4	2	2.69400180498121e-05
departments of immunology	5	2	2.69400180498121e-05
laboratory of brain cognition	4	2	2.69400180498121e-05
brain behavior discovery institute	5	2	2.69400180498121e-05
nuffield department of clinical neurosciences	5	2	2.69400180498121e-05
sackler faculty of medicine	4	2	2.69400180498121e-05
alberta children's hospital research institute	2	2	2.69400180498121e-05
departments of anesthesia pain medicine	6	2	2.69400180498121e-05
surgical neurology branch	7	2	2.69400180498121e-05
university of north carolina neuroscience center	3	2	2.69400180498121e-05
department of functional genomics	5	2	2.69400180498121e-05
physiology behavior	3	2	2.69400180498121e-05
departments of genetics	14	2	2.69400180498121e-05
new york 11794-2500	3	2	2.69400180498121e-05
robarts research institute	7	2	2.69400180498121e-05
department of neurobiology anatomy	7	2	2.69400180498121e-05
department of psychiatry biobehavioral sciences	3	2	2.69400180498121e-05
curriculum in neurobiology	4	2	2.69400180498121e-05
montreal neurological institute	9	2	2.69400180498121e-05
department of pharmacology neuroscience	8	2	2.69400180498121e-05
department of anatomy histology	11	2	2.69400180498121e-05
brain research center	4	2	2.69400180498121e-05
solomon h. snyder department of neuroscience	8	2	2.69400180498121e-05
california 90089-2520	9	2	2.69400180498121e-05
school of psychology	9	2	2.69400180498121e-05
department of physical medicine rehabilitation	5	2	2.69400180498121e-05
unit on neuron-glia interactions in retinal disease	11	2	2.69400180498121e-05
retinal circuit development genetics unit	4	2	2.69400180498121e-05
department of systems neuroscience	4	2	2.69400180498121e-05
peking-tsinghua center for life sciences	3	2	2.69400180498121e-05
departments of biology	4	2	2.69400180498121e-05
department of organismal biology anatomy	7	2	2.69400180498121e-05
center for brain spinal cord repair	5	2	2.69400180498121e-05
v6t 1z3 canada	6	2	2.69400180498121e-05
the brain mind institute	5	2	2.69400180498121e-05
institute for mind biology	9	2	2.69400180498121e-05
department of cell molecular biology	3	2	2.69400180498121e-05
canada m5s 1a8	5	2	2.69400180498121e-05
department of neuroscience regenerative medicine	8	2	2.69400180498121e-05
wellcome trust centre for neuroimaging	4	2	2.69400180498121e-05
interdisciplinary center for biotechnology research	2	2	2.69400180498121e-05
divisions of neuroscience	4	2	2.69400180498121e-05
picower institute for learning memory	12	2	2.69400180498121e-05
helsinki finland	4	2	2.69400180498121e-05
zlotowski center for neuroscience	4	2	2.69400180498121e-05
canada h3a 2b2	2	2	2.69400180498121e-05
neurosciences graduate program	4	2	2.69400180498121e-05
canada m6a 2e1	8	2	2.69400180498121e-05
canada m5s 3g3	2	2	2.69400180498121e-05
virginia 22904-4400	5	2	2.69400180498121e-05
boston ma	4	2	2.69400180498121e-05
department of physiology neurobiology	10	2	2.69400180498121e-05
institute of cognitive science	4	2	2.69400180498121e-05
m5s 3g3	4	2	2.69400180498121e-05
experimental hematology cancer biology	3	2	2.69400180498121e-05
college of physicians surgeons	10	2	2.69400180498121e-05
australian research council centre of excellence for integrative brain function	6	2	2.69400180498121e-05
psychological sciences	9	2	2.69400180498121e-05
interdisciplinary stem cell institute	19	2	2.69400180498121e-05
department of cognitive science	6	2	2.69400180498121e-05
mcknight brain institute	6	2	2.69400180498121e-05
interdisciplinary graduate program in neuroscience	7	2	2.69400180498121e-05
on k7l 3n6 canada	2	2	2.69400180498121e-05
institute of neurology	2	2	2.69400180498121e-05
department of molecular human genetics	10	2	2.69400180498121e-05
weill institute for neurosciences	10	2	2.69400180498121e-05
kavli institute for fundamental neuroscience	12	2	2.69400180498121e-05
ohio 44106-4975	5	2	2.69400180498121e-05
japan 351-0198	7	2	2.69400180498121e-05
liban	4	2	2.69400180498121e-05
grand-duchy of luxembourg	5	2	2.69400180498121e-05
canada center for structural genomics of infectious diseases (csgid)	6	2	2.69400180498121e-05
principality of monaco	10	2	2.69400180498121e-05
ny 11794-5222	6	2	2.69400180498121e-05
ct 06520-8026	6	2	2.69400180498121e-05
ca 90089-2910	6	2	2.69400180498121e-05
ne 68198-5870	11	2	2.69400180498121e-05
fl 32306-4300	7	2	2.69400180498121e-05
ny 11794-5215	6	2	2.69400180498121e-05
tx 77843-3474	8	2	2.69400180498121e-05
md 21205-2185	11	2	2.69400180498121e-05
ct 06520-8103	19	2	2.69400180498121e-05
ca 94158-2517	6	2	2.69400180498121e-05
urbana-champaign	3	2	2.69400180498121e-05
stanford university school of medicine	4	2	2.69400180498121e-05
university at albany	7	2	2.69400180498121e-05
university of oregon	4	2	2.69400180498121e-05
the university of chicago	7	2	2.69400180498121e-05
university of pittsburgh	3	2	2.69400180498121e-05
university of california at san diego	3	2	2.69400180498121e-05
university of idaho	11	2	2.69400180498121e-05
ab	3	2	2.69400180498121e-05
kingdom of cambodia	11	2	2.69400180498121e-05
l8s 4k1	5	2	2.69400180498121e-05
v6t1z4	2	2	2.69400180498121e-05
g1v0a6	8	2	2.69400180498121e-05
e2l 4l5	3	2	2.69400180498121e-05
la réunion	4	2	2.69400180498121e-05
t6g 2e9	5	2	2.69400180498121e-05
montenegro	2	2	2.69400180498121e-05
nouvelle-calédonie	10	2	2.69400180498121e-05
republic of seychelles	2	2	2.69400180498121e-05
republic of benin	3	2	2.69400180498121e-05
falkland islands	3	2	2.69400180498121e-05
république du congo	5	2	2.69400180498121e-05
cb10 1hh	6	2	2.69400180498121e-05
newcastle upon tyne	2	2	2.69400180498121e-05
baltimore usa	5	2	2.69400180498121e-05
au	3	2	2.69400180498121e-05
canada g1j 2g3	4	2	2.69400180498121e-05
deutschland	9	2	2.69400180498121e-05
nz	6	2	2.69400180498121e-05
moscow russia	6	2	2.69400180498121e-05
barcelona. spain	6	2	2.69400180498121e-05
haifa israel	5	2	2.69400180498121e-05
brisbane australia	7	2	2.69400180498121e-05
ksa	2	2	2.69400180498121e-05
leipzig germany	3	2	2.69400180498121e-05
north carolina united states of america	4	2	2.69400180498121e-05
colorado united states of america	2	2	2.69400180498121e-05
fl united states of america	3	2	2.69400180498121e-05
united states of ameirca	8	2	2.69400180498121e-05
ca united states of america	5	2	2.69400180498121e-05
wa united states of america	7	2	2.69400180498121e-05
ny; united states of america	8	2	2.69400180498121e-05
united kingodm	8	2	2.69400180498121e-05
tx united states of america	8	2	2.69400180498121e-05
st. kitts	2	2	2.69400180498121e-05
republic of the philippines	10	2	2.69400180498121e-05
el salvador	2	2	2.69400180498121e-05
afghanistan	9	2	2.69400180498121e-05
suisse	2	2	2.69400180498121e-05
martinique	2	2	2.69400180498121e-05
guyane	13	2	2.69400180498121e-05
republique democratique du congo	7	2	2.69400180498121e-05
reunion island	10	2	2.69400180498121e-05
bamenda	2	2	2.69400180498121e-05
maryland; united states of america	13	2	2.69400180498121e-05
republic of south sudan	11	2	2.69400180498121e-05
basel switzerland	4	2	2.69400180498121e-05
république de guinée	5	2	2.69400180498121e-05
drc	2	2	2.69400180498121e-05
amsterdam the netherlands	5	2	2.69400180498121e-05
imperial college london	9	2	2.69400180498121e-05
madrid (spain)	13	2	2.69400180498121e-05
ca 92697-1275	5	2	2.69400180498121e-05
ca 92697-4560	2	2	2.69400180498121e-05
ca 92697-2715	2	2	2.69400180498121e-05
ca 92697-4025	2	2	2.69400180498121e-05
neuroscience behavior graduate program	5	2	2.69400180498121e-05
08 czech republic	1	1	1.3470009024906e-05
sariyer istanbul turkey	1	1	1.3470009024906e-05
jerusalem	1	1	1.3470009024906e-05
409-3898 japan	1	1	1.3470009024906e-05
h3t 1c5 canada	1	1	1.3470009024906e-05
ca 94158,usa	1	1	1.3470009024906e-05
cambridge cb10 1sd uk	2	1	1.3470009024906e-05
he netherlands	1	1	1.3470009024906e-05
germany; genetic modifiers of huntington's disease consortium	1	1	1.3470009024906e-05
qc h3a0g4 canada	2	1	1.3470009024906e-05
ca the netherlands	3	1	1.3470009024906e-05
rouen france	1	1	1.3470009024906e-05
united arab of emirates	1	1	1.3470009024906e-05
al usa	1	1	1.3470009024906e-05
ontario m5g 1x8 canada	1	1	1.3470009024906e-05
see document s1 for list of collaborators	1	1	1.3470009024906e-05
ct 06520-8002	1	1	1.3470009024906e-05
spain center for biomedical research-network of rare diseases (ciberer)	2	1	1.3470009024906e-05
ny 14642,usa	1	1	1.3470009024906e-05
tehran-iran	1	1	1.3470009024906e-05
on k1h 8l1 canada	3	1	1.3470009024906e-05
german	1	1	1.3470009024906e-05
switzeland	1	1	1.3470009024906e-05
p.r. of china	2	1	1.3470009024906e-05
34025	1	1	1.3470009024906e-05
british	1	1	1.3470009024906e-05
8001	3	1	1.3470009024906e-05
the united states	1	1	1.3470009024906e-05
north cyprus	1	1	1.3470009024906e-05
20037	1	1	1.3470009024906e-05
p. r china	4	1	1.3470009024906e-05
sa	2	1	1.3470009024906e-05
560012	5	1	1.3470009024906e-05
people's republic popular of china	1	1	1.3470009024906e-05
dominica	2	1	1.3470009024906e-05
belguim	2	1	1.3470009024906e-05
g1v 4g2	3	1	1.3470009024906e-05
h7v 4b3	2	1	1.3470009024906e-05
u.s.a.	1	1	1.3470009024906e-05
v2y 1y1	6	1	1.3470009024906e-05
fiji islands	1	1	1.3470009024906e-05
610000	1	1	1.3470009024906e-05
l35qa	4	1	1.3470009024906e-05
guinea-bissau	1	1	1.3470009024906e-05
sultanate of oman	6	1	1.3470009024906e-05
141700	1	1	1.3470009024906e-05
197101	1	1	1.3470009024906e-05
umr urgv	1	1	1.3470009024906e-05
cardif	5	1	1.3470009024906e-05
japan depar	1	1	1.3470009024906e-05
ut usa	9	1	1.3470009024906e-05
division of cell developmental biology	2	1	1.3470009024906e-05
mrc protein phosphorylation unit	1	1	1.3470009024906e-05
division of signal transduction therapy	1	1	1.3470009024906e-05
s7n 5e3 canada	2	1	1.3470009024906e-05
s7n 5c9 canada	1	1	1.3470009024906e-05
center for quantitative sciences	1	1	1.3470009024906e-05
department of drug science	2	1	1.3470009024906e-05
nonlinearity complexity research group	2	1	1.3470009024906e-05
calcutta	2	1	1.3470009024906e-05
intel corporation belgium	1	1	1.3470009024906e-05
istituto di biomembrane e bioenergetica	1	1	1.3470009024906e-05
the sainsbury laboratory	2	1	1.3470009024906e-05
ieeta	2	1	1.3470009024906e-05
st james's university hospital	5	1	1.3470009024906e-05
institute of bioinformatics	1	1	1.3470009024906e-05
bioinformatics genomics graduate program	1	1	1.3470009024906e-05
center for computational biology	3	1	1.3470009024906e-05
e-28042 madrid	2	1	1.3470009024906e-05
e-28049 madrid	3	1	1.3470009024906e-05
são gabriel	6	1	1.3470009024906e-05
the microsoft research-university of trento centre for computational systems biology	1	1	1.3470009024906e-05
department of cardiovascular development repair	2	1	1.3470009024906e-05
wäde	2	1	1.3470009024906e-05
university of duisburg-essen	1	1	1.3470009024906e-05
uc berkeley	1	1	1.3470009024906e-05
walnut creek	1	1	1.3470009024906e-05
menlo park	1	1	1.3470009024906e-05
st. petersburg academic university	1	1	1.3470009024906e-05
st.petersburg state university	2	1	1.3470009024906e-05
escola tècnica superior d'enginyeria	2	1	1.3470009024906e-05
facultad de biología	1	1	1.3470009024906e-05
london se1 7eh	1	1	1.3470009024906e-05
institute for genomics bioinformatics	3	1	1.3470009024906e-05
mass spectrometry research centre	1	1	1.3470009024906e-05
centro de investigación príncipe felipe	3	1	1.3470009024906e-05
universidad de valencia	2	1	1.3470009024906e-05
karlsruhe institute of technolo	1	1	1.3470009024906e-05
the first affiliated hospital of tsinghua university	1	1	1.3470009024906e-05
nanyang technological university	2	1	1.3470009024906e-05
bhupat jyoti mehta school of biosciences	2	1	1.3470009024906e-05
v5a 1s6	2	1	1.3470009024906e-05
hôpital st louis	1	1	1.3470009024906e-05
conservatoire national des arts et métiers (cnam)	3	1	1.3470009024906e-05
systems biology of signal transduction	3	1	1.3470009024906e-05
st andrews	1	1	1.3470009024906e-05
edinburgh genomics	1	1	1.3470009024906e-05
division of plant sciences	1	1	1.3470009024906e-05
engineering & medicine for human health (chem-h)	1	1	1.3470009024906e-05
washington university in st louis	1	1	1.3470009024906e-05
washington university school of medicine	4	1	1.3470009024906e-05
uam	1	1	1.3470009024906e-05
richland wa	3	1	1.3470009024906e-05
computational bioscience research center	2	1	1.3470009024906e-05
l3 bioinformatics limited	5	1	1.3470009024906e-05
hong kong sanatorium hospital	2	1	1.3470009024906e-05
department of electronics computer engineering	2	1	1.3470009024906e-05
ga 30322,usa	1	1	1.3470009024906e-05
mn 55905,usa	2	1	1.3470009024906e-05
jiangsu suzhou 215006,china	1	1	1.3470009024906e-05
department of electrical computer engineering &	2	1	1.3470009024906e-05
center for geogenetics	1	1	1.3470009024906e-05
prbb	4	1	1.3470009024906e-05
icahn institute of genomics multiscale biology	1	1	1.3470009024906e-05
centro de matemática e aplicações (cma)	1	1	1.3470009024906e-05
sydney medical school	1	1	1.3470009024906e-05
department of computer engineering	2	1	1.3470009024906e-05
institute for theoretical chemistry	1	1	1.3470009024906e-05
center for bioinformatics computational biology delaware biotechnology institute	2	1	1.3470009024906e-05
center for bioinformatics genomics	1	1	1.3470009024906e-05
school of oceanography	2	1	1.3470009024906e-05
ludmer center for neuroinformatics mental health	3	1	1.3470009024906e-05
brunel university london	1	1	1.3470009024906e-05
canada t6g 2v4	1	1	1.3470009024906e-05
center for bioinformatics	1	1	1.3470009024906e-05
nijmegen	1	1	1.3470009024906e-05
michigan center for translational pathology	1	1	1.3470009024906e-05
university of colorado denver	1	1	1.3470009024906e-05
division of bioinformatics	3	1	1.3470009024906e-05
beijing institute of radiation medicine	5	1	1.3470009024906e-05
molecular medicine science for life laboratory	4	1	1.3470009024906e-05
cancer pharmacology computational medicine	1	1	1.3470009024906e-05
ca 92093-0359 usa	5	1	1.3470009024906e-05
computer science department	4	1	1.3470009024906e-05
center of molecular immunology	1	1	1.3470009024906e-05
università di palermo	2	1	1.3470009024906e-05
regensburg	2	1	1.3470009024906e-05
göttingen	2	1	1.3470009024906e-05
department of biochemistry biophysics center for rna biology	2	1	1.3470009024906e-05
wolfson imaging centre	1	1	1.3470009024906e-05
institute for translational biomedicine	1	1	1.3470009024906e-05
marcy-l'étoile	3	1	1.3470009024906e-05
f-13288 france	2	1	1.3470009024906e-05
scientific computation	1	1	1.3470009024906e-05
department of urology	2	1	1.3470009024906e-05
department of general biology	5	1	1.3470009024906e-05
univ. de buenos aires	2	1	1.3470009024906e-05
institute of zoology	4	1	1.3470009024906e-05
department of human genetics einthoven laboratory for experimental vascular medicine	1	1	1.3470009024906e-05
department of mathematics computer science	1	1	1.3470009024906e-05
university of freiburg	3	1	1.3470009024906e-05
oregon clinical translational research institute	1	1	1.3470009024906e-05
department of molecular medicine (moma)	4	1	1.3470009024906e-05
morgridge institute for research	4	1	1.3470009024906e-05
university of wisconsin	1	1	1.3470009024906e-05
salzburg	1	1	1.3470009024906e-05
computational systems biochemistry	1	1	1.3470009024906e-05
royal college of surgeons in ireland	2	1	1.3470009024906e-05
saarbrücken d-66041	7	1	1.3470009024906e-05
homburg d-66421	2	1	1.3470009024906e-05
d-72076	2	1	1.3470009024906e-05
würzburg d-97074	1	1	1.3470009024906e-05
cardiovascular institute	1	1	1.3470009024906e-05
department of human cancer genetics molecular virology	1	1	1.3470009024906e-05
oslo n-0424	2	1	1.3470009024906e-05
computer science statistics	4	1	1.3470009024906e-05
department of veterinary diagnostic production animal medicine	1	1	1.3470009024906e-05
institute of experimental cancer research	1	1	1.3470009024906e-05
university of milano-bicocca	3	1	1.3470009024906e-05
center for bioinformatics computational biologyand	3	1	1.3470009024906e-05
china department of chemistry biochemistry	1	1	1.3470009024906e-05
department of genome sciences	1	1	1.3470009024906e-05
70040-020 brazil	1	1	1.3470009024906e-05
department of medicinal chemistry molecular pharmacology purdue university center for cancer research	1	1	1.3470009024906e-05
department of computer information science	2	1	1.3470009024906e-05
ucsf eli edythe broad center of regeneration medicine stem cell research	1	1	1.3470009024906e-05
eli edythe broad center of regeneration medicine stem cell research	5	1	1.3470009024906e-05
ucsf eli edythe broad center of regeneration medicine stem cell research eli edythe broad center of regeneration medicine stem cell research	1	1	1.3470009024906e-05
department of biochemistry biomedical sciences	1	1	1.3470009024906e-05
natural history museum of denmark	1	1	1.3470009024906e-05
department of medicine department of biostatistics	1	1	1.3470009024906e-05
medical school	1	1	1.3470009024906e-05
department of electrical engineering computer science department of biomedical engineering department of statistics	1	1	1.3470009024906e-05
verona	3	1	1.3470009024906e-05
catania	3	1	1.3470009024906e-05
department of biostatistics department of genetics department of computer science	2	1	1.3470009024906e-05
technology research (a*star)	4	1	1.3470009024906e-05
st paul	1	1	1.3470009024906e-05
australia department of medical biology	1	1	1.3470009024906e-05
gent	1	1	1.3470009024906e-05
warwick medical school	2	1	1.3470009024906e-05
school of computer science engineering	2	1	1.3470009024906e-05
center for quantitative medicine	1	1	1.3470009024906e-05
university of catania	4	1	1.3470009024906e-05
- zona industriale blocco palma	4	1	1.3470009024906e-05
virginia institute for psychiatric behavioral genetics	7	1	1.3470009024906e-05
department of electrical engineering computer science	2	1	1.3470009024906e-05
center for bioinformatics computational biology department of computer science	2	1	1.3470009024906e-05
university of chinese academy of sciences key laboratory of big data mining knowledge management	2	1	1.3470009024906e-05
small molecule screening facility	1	1	1.3470009024906e-05
magnetic resonance center (cerm)	1	1	1.3470009024906e-05
centre for genomic sciences	3	1	1.3470009024906e-05
department of anaesthesiology	2	1	1.3470009024906e-05
department of translational molecular pathology department of epidemiology	2	1	1.3470009024906e-05
department of epidemiology	1	1	1.3470009024906e-05
department of genetics genomic sciences icahn institute for genomics multiscale biology	8	1	1.3470009024906e-05
interdisciplinary program in bioinformatics	2	1	1.3470009024906e-05
department of computer science department of biological chemistry	1	1	1.3470009024906e-05
department of computer science software engineering	2	1	1.3470009024906e-05
the first two authors should be regarded as joint first authors	2	1	1.3470009024906e-05
switzerland sib swiss institute of bioinformatics	1	1	1.3470009024906e-05
department of computer science engineering department of electrical engineering	1	1	1.3470009024906e-05
computer science artificial intelligence laboratory	2	1	1.3470009024906e-05
3584ch the netherlands	3	1	1.3470009024906e-05
kanagawa 230-0045 japan	1	1	1.3470009024906e-05
department of computer science engineering eck institute of global health interdisciplinary center for network science applications	2	1	1.3470009024906e-05
department of preventive medicine eli edythe broad center for regenerative medicine stem cell research zilkha neurogenetic institute	1	1	1.3470009024906e-05
eli edythe broad center for regenerative medicine stem cell research zilkha neurogenetic institute	1	1	1.3470009024906e-05
eli edythe broad center for regenerative medicine stem cell research department of stem cell biology regenerative medicine	1	1	1.3470009024906e-05
israel the mina everard goodman faculty of life sciences	2	1	1.3470009024906e-05
institute for translational medicine therapeutics	2	1	1.3470009024906e-05
institute of bioinformatics systems biology	5	1	1.3470009024906e-05
institute of biomedical engineering	2	1	1.3470009024906e-05
606-8507 japan	1	1	1.3470009024906e-05
305-0047 japan	1	1	1.3470009024906e-05
institute of crop sciences & institute of bioinformatics	6	1	1.3470009024906e-05
canada h1t 1c8	4	1	1.3470009024906e-05
university of british columbia	1	1	1.3470009024906e-05
gr	3	1	1.3470009024906e-05
vanderbilt genetics institute	2	1	1.3470009024906e-05
department of microbiology/immunology	1	1	1.3470009024906e-05
[truncated: 5,119 more rows]
