# Supplementary figures and images for: Releasing a preprint is associated with more attention and citations for the peer-reviewed article
Source: eLife journal article supplement (doi:10.7554/elife.52646), 2019-12-06

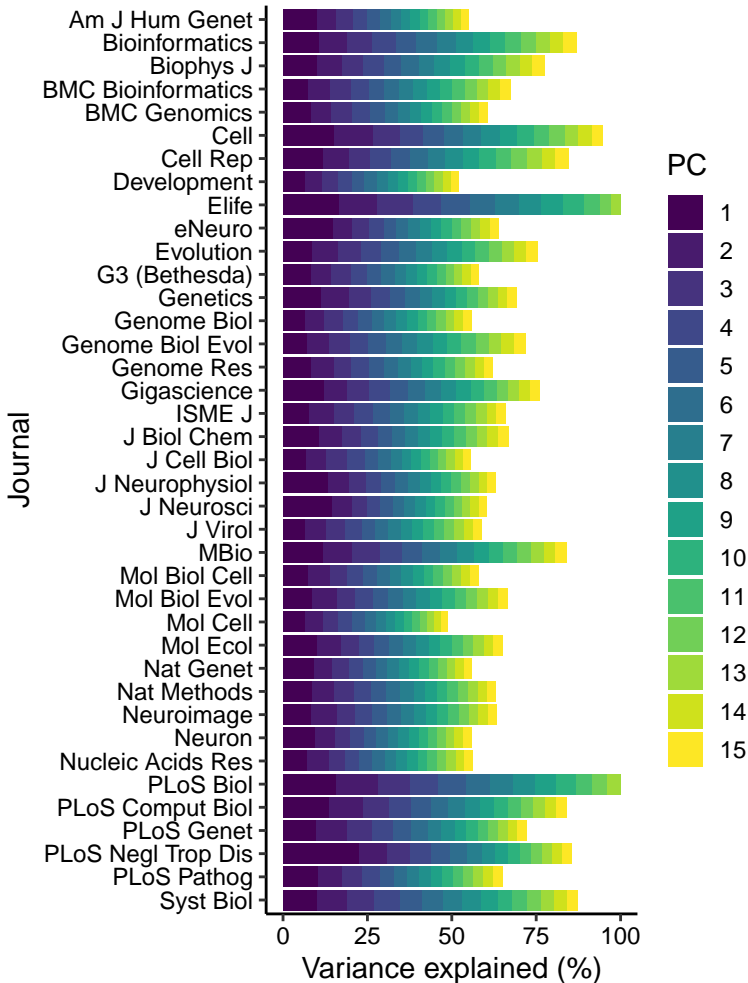

Supplement: supp [file elife-52646-supp-v1.zip › elife_poa_e52646_Figure_1_figure_supplement_6.pdf]

× no ○ yes

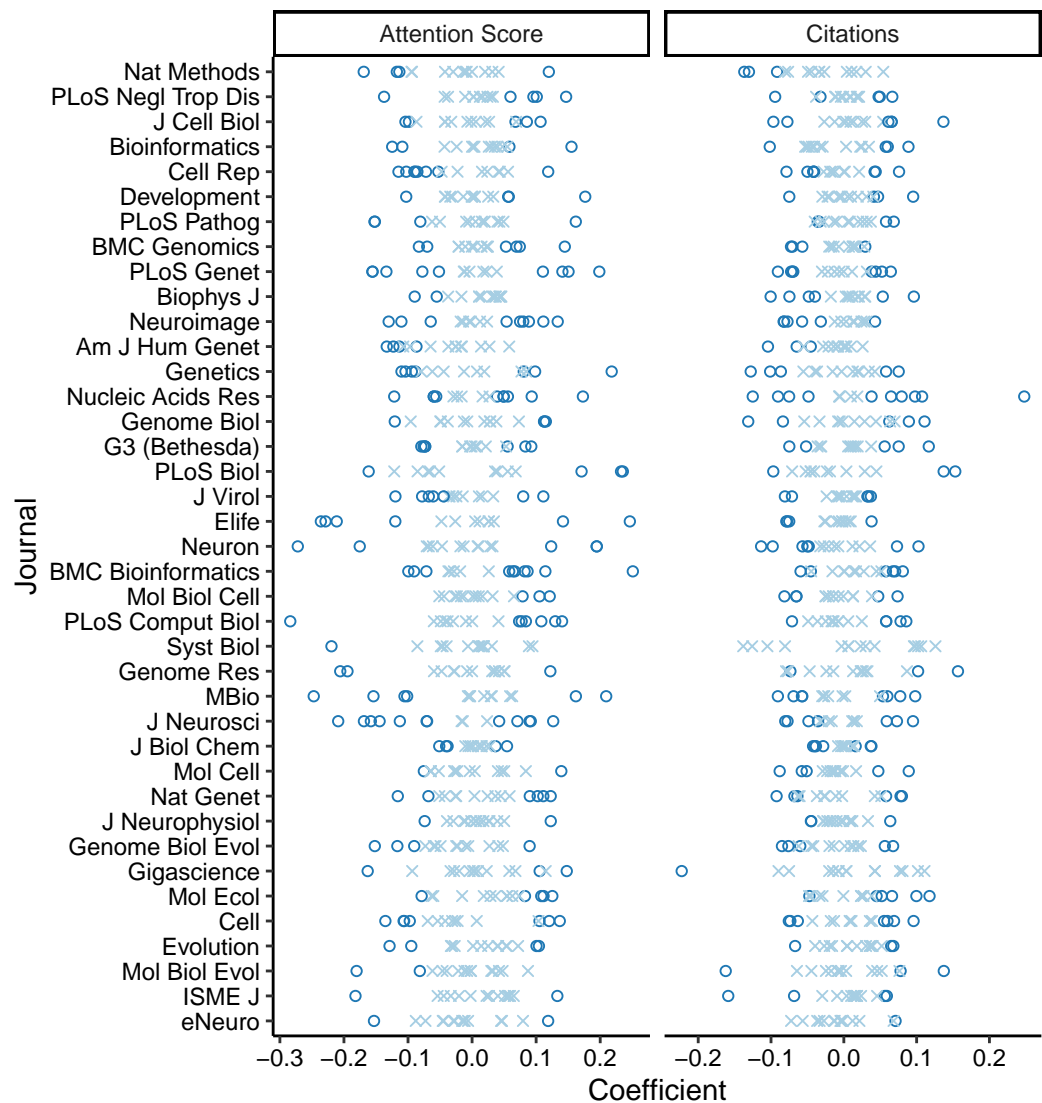

Supplement: supp [file elife-52646-supp-v1.zip › elife_poa_e52646_Figure_2_figure_supplement_1.pdf]

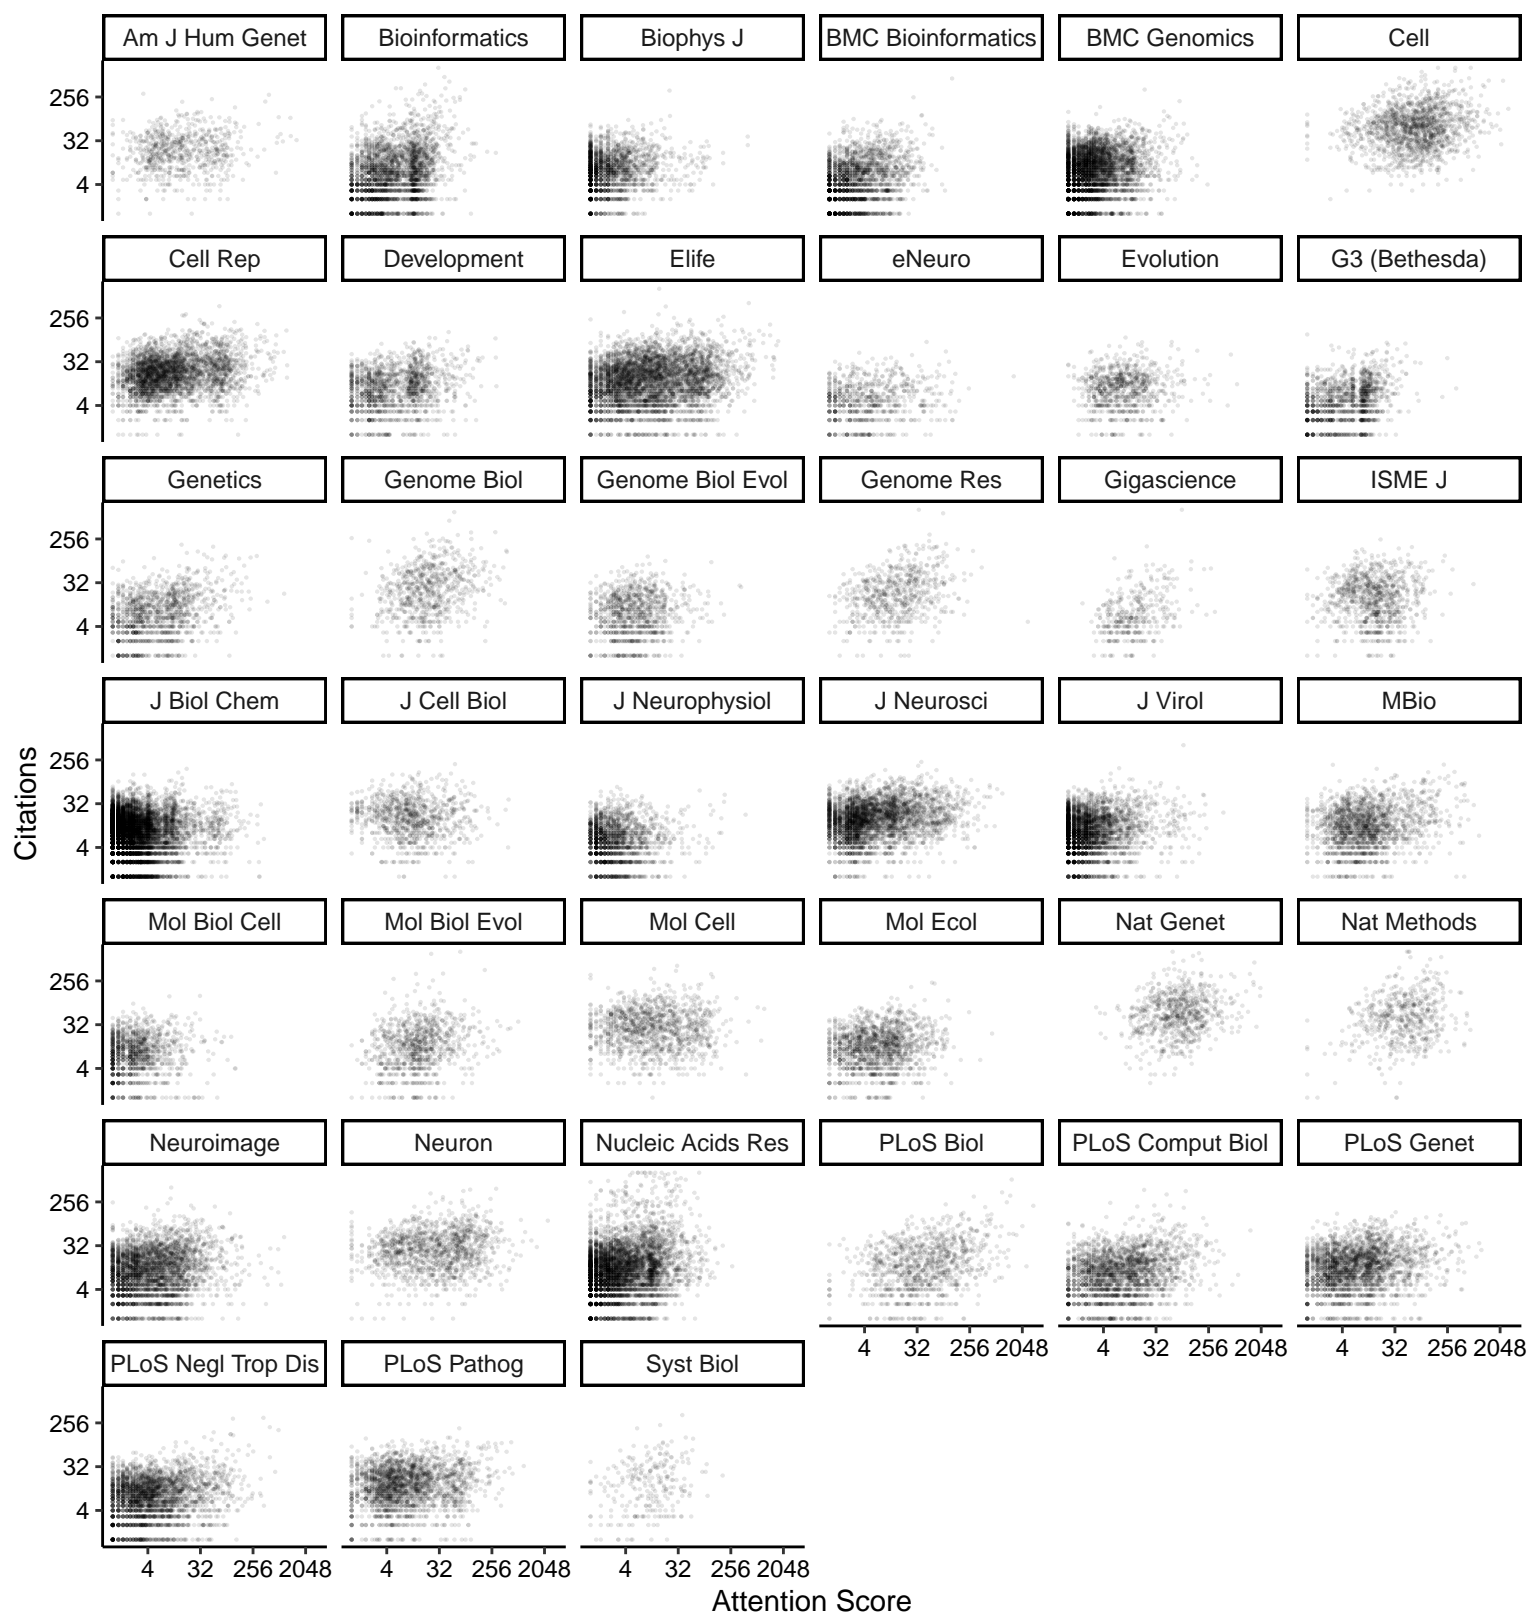

Supplement: supp [file elife-52646-supp-v1.zip › elife_poa_e52646_Figure_1_figure_supplement_5.pdf]

Number of articles

600  
400  
200  
0

0

300

600

900

Days between release of preprint and  
publication of peer-reviewed article

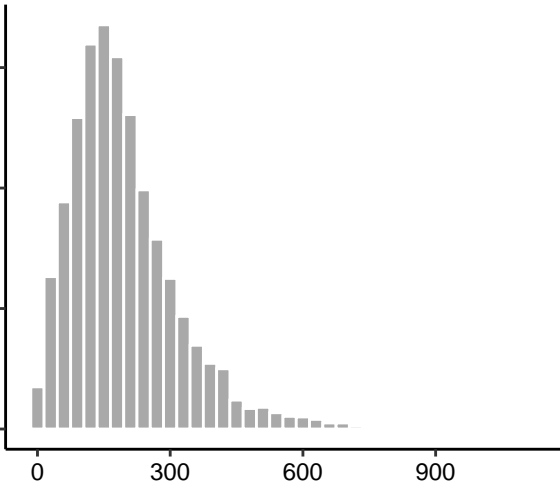

Supplement: supp [file elife-52646-supp-v1.zip › elife_poa_e52646_Figure_1_figure_supplement_2.pdf]

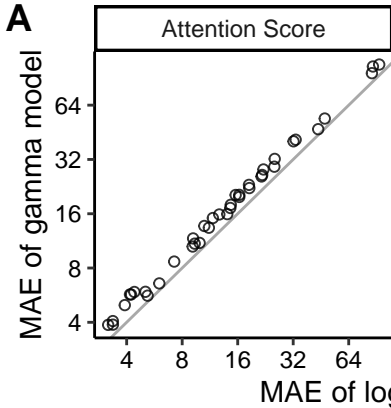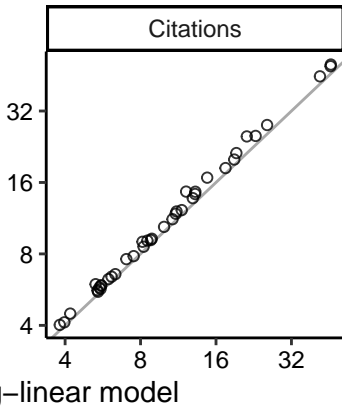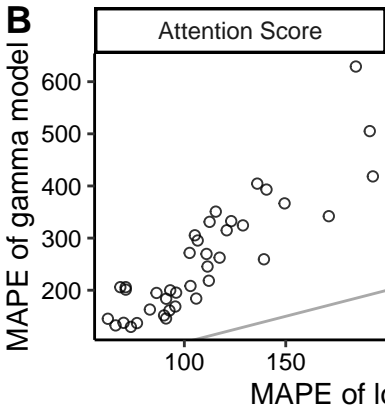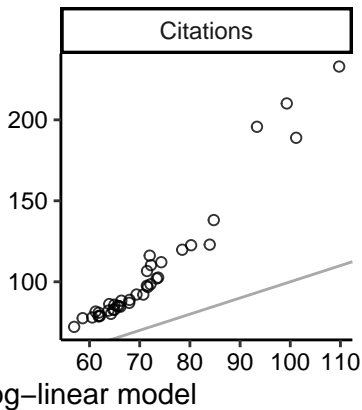

Supplement: supp [file elife-52646-supp-v1.zip › elife_poa_e52646_Figure_1_figure_supplement_8.pdf]

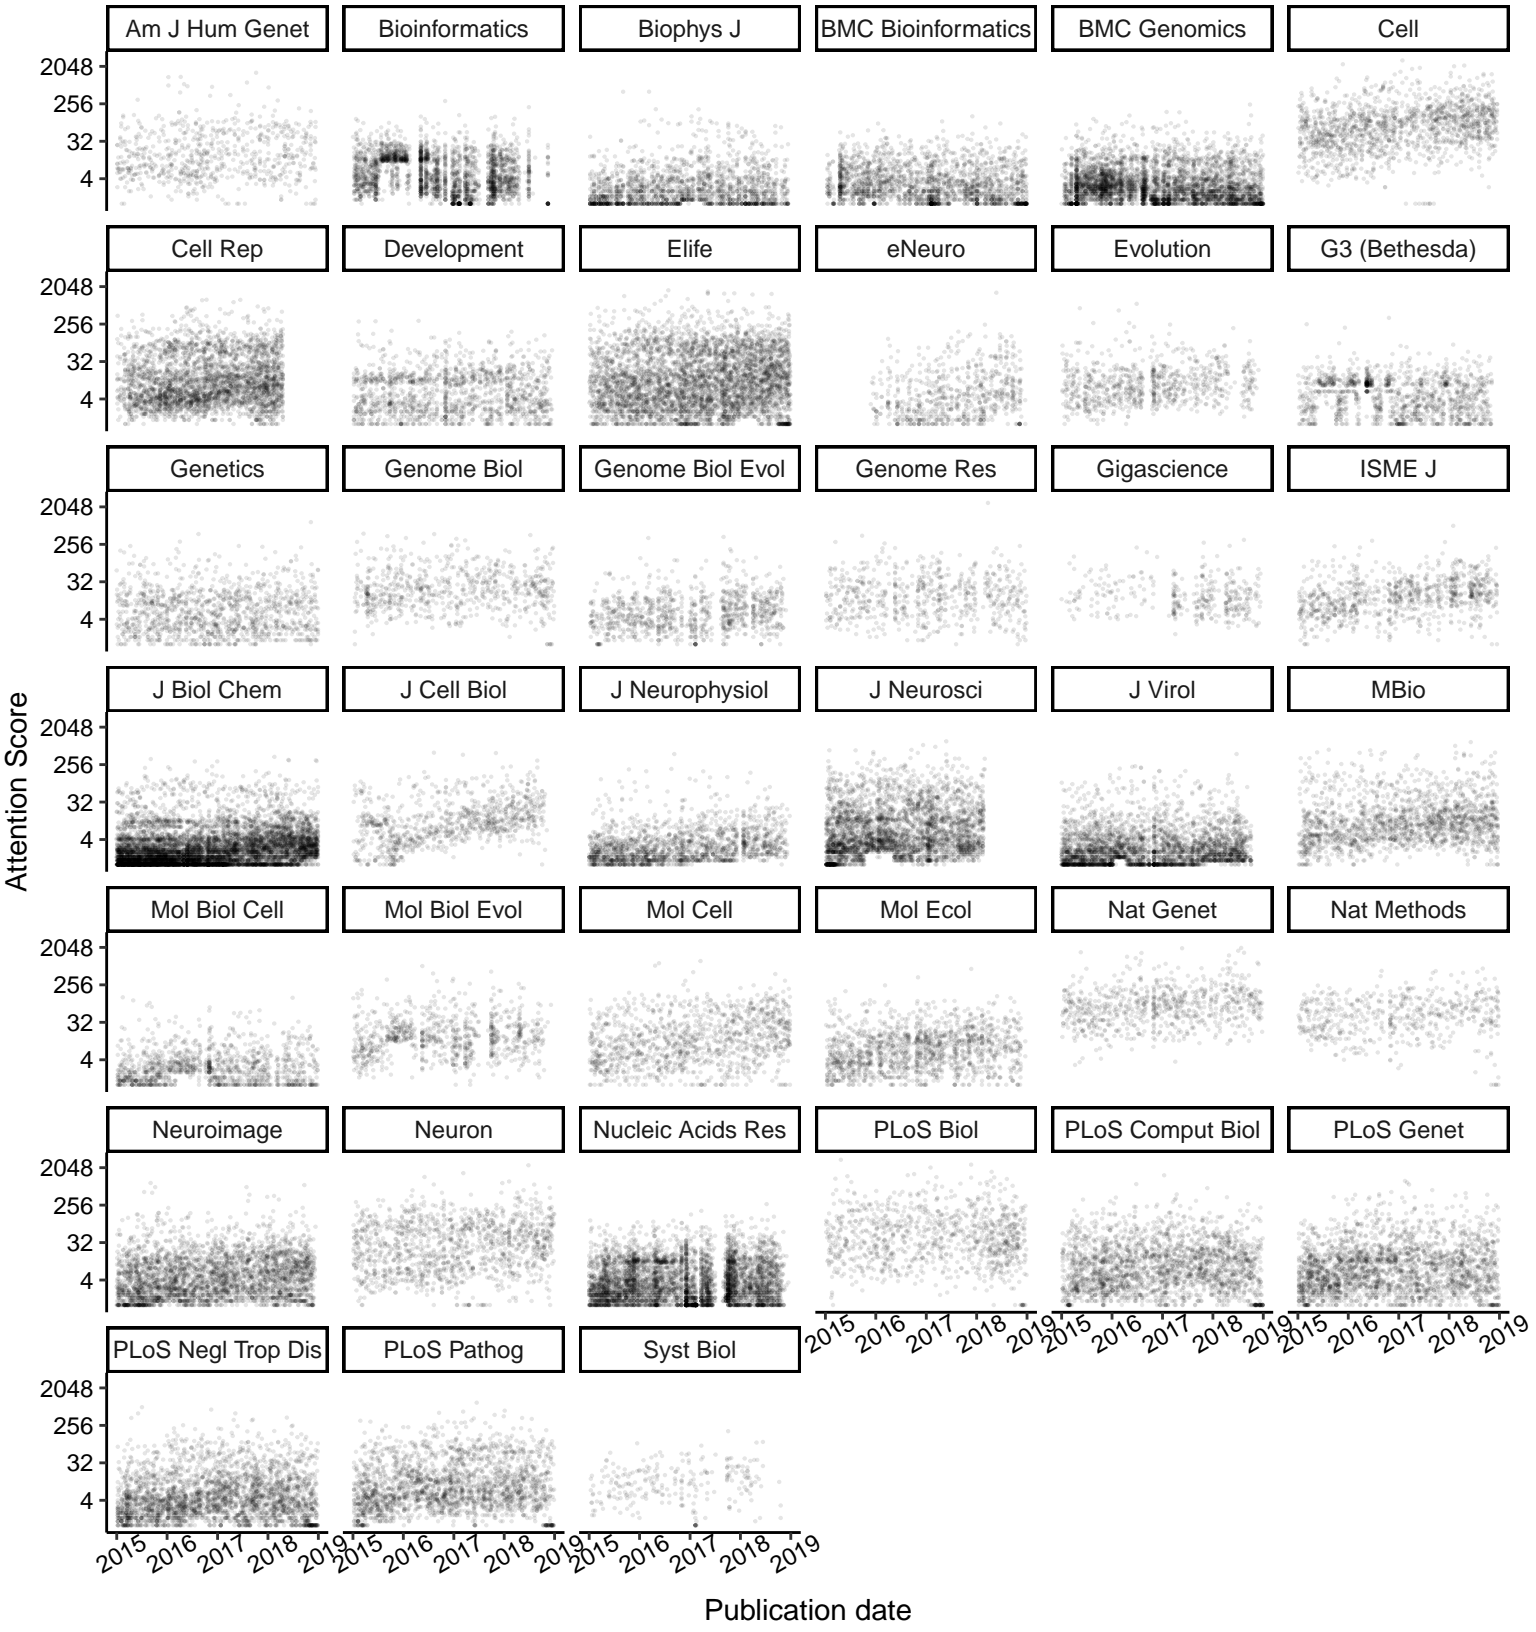

Supplement: supp [file elife-52646-supp-v1.zip › elife_poa_e52646_Figure_1_figure_supplement_3.pdf]

Date of first last-author  
publication (automatic)

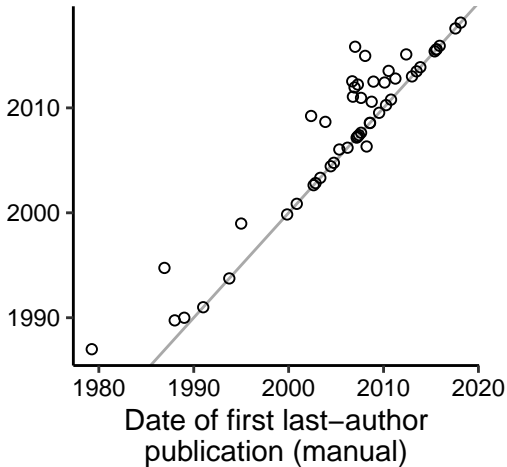

Supplement: supp [file elife-52646-supp-v1.zip › elife_poa_e52646_Figure_1_figure_supplement_1.pdf]

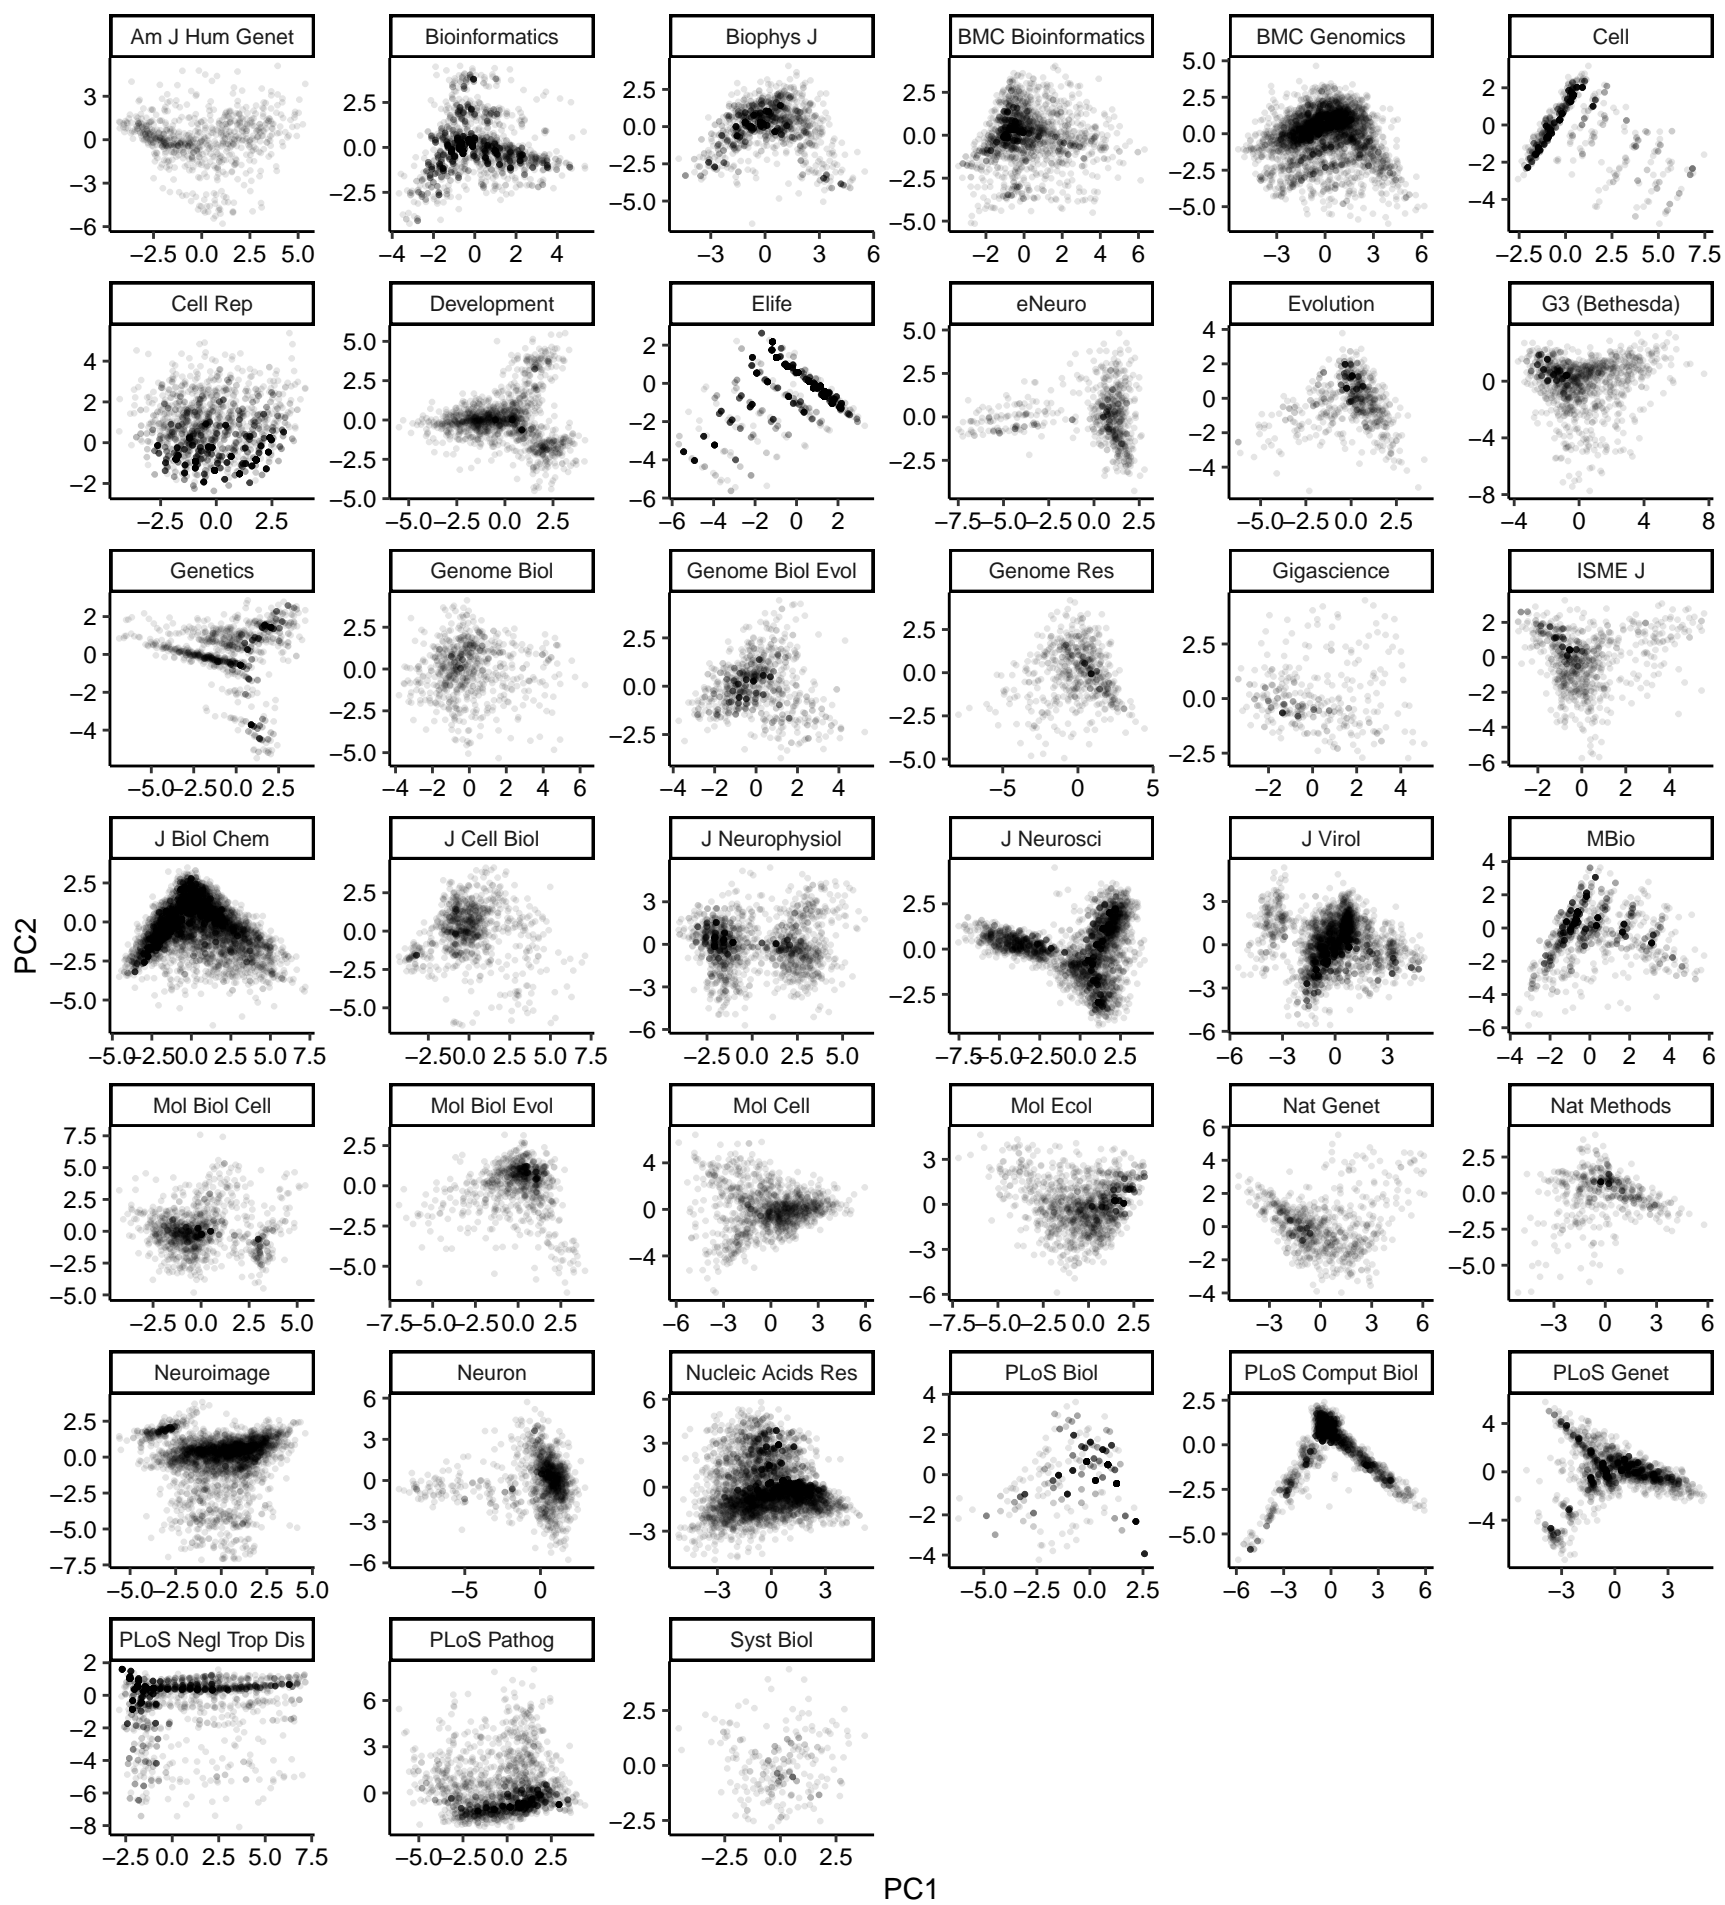

Supplement: supp [file elife-52646-supp-v1.zip › elife_poa_e52646_Figure_1_figure_supplement_7.pdf]

Preprint — no — yes

Journal

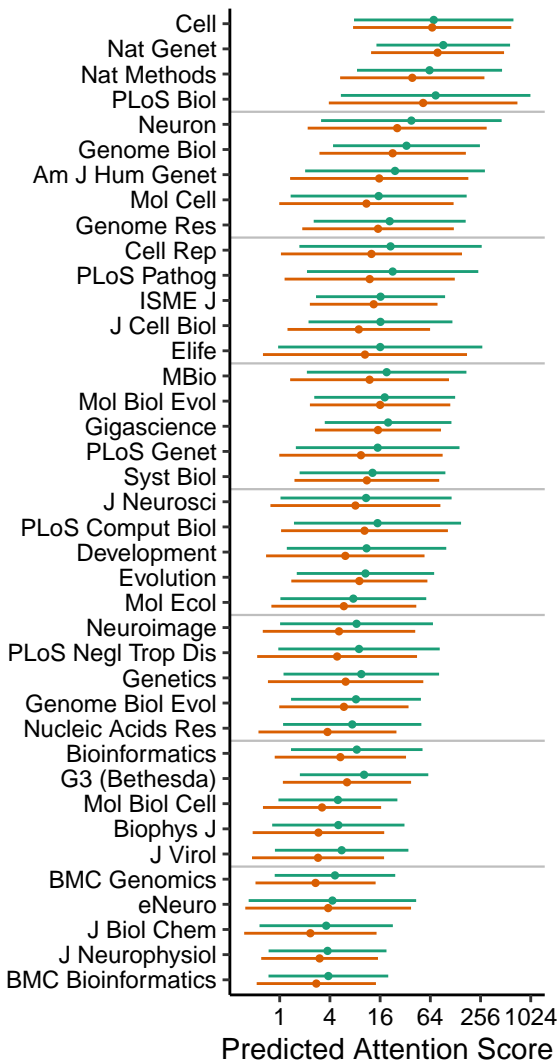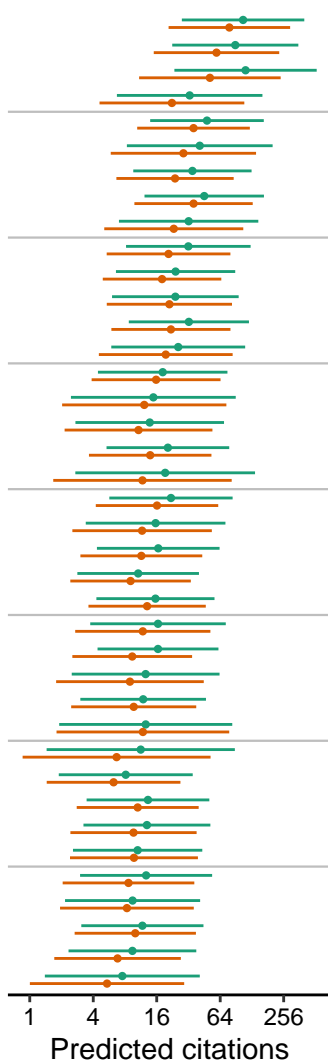

Supplement: supp [file elife-52646-supp-v1.zip › elife_poa_e52646_Figure_1_figure_supplement_9.pdf]

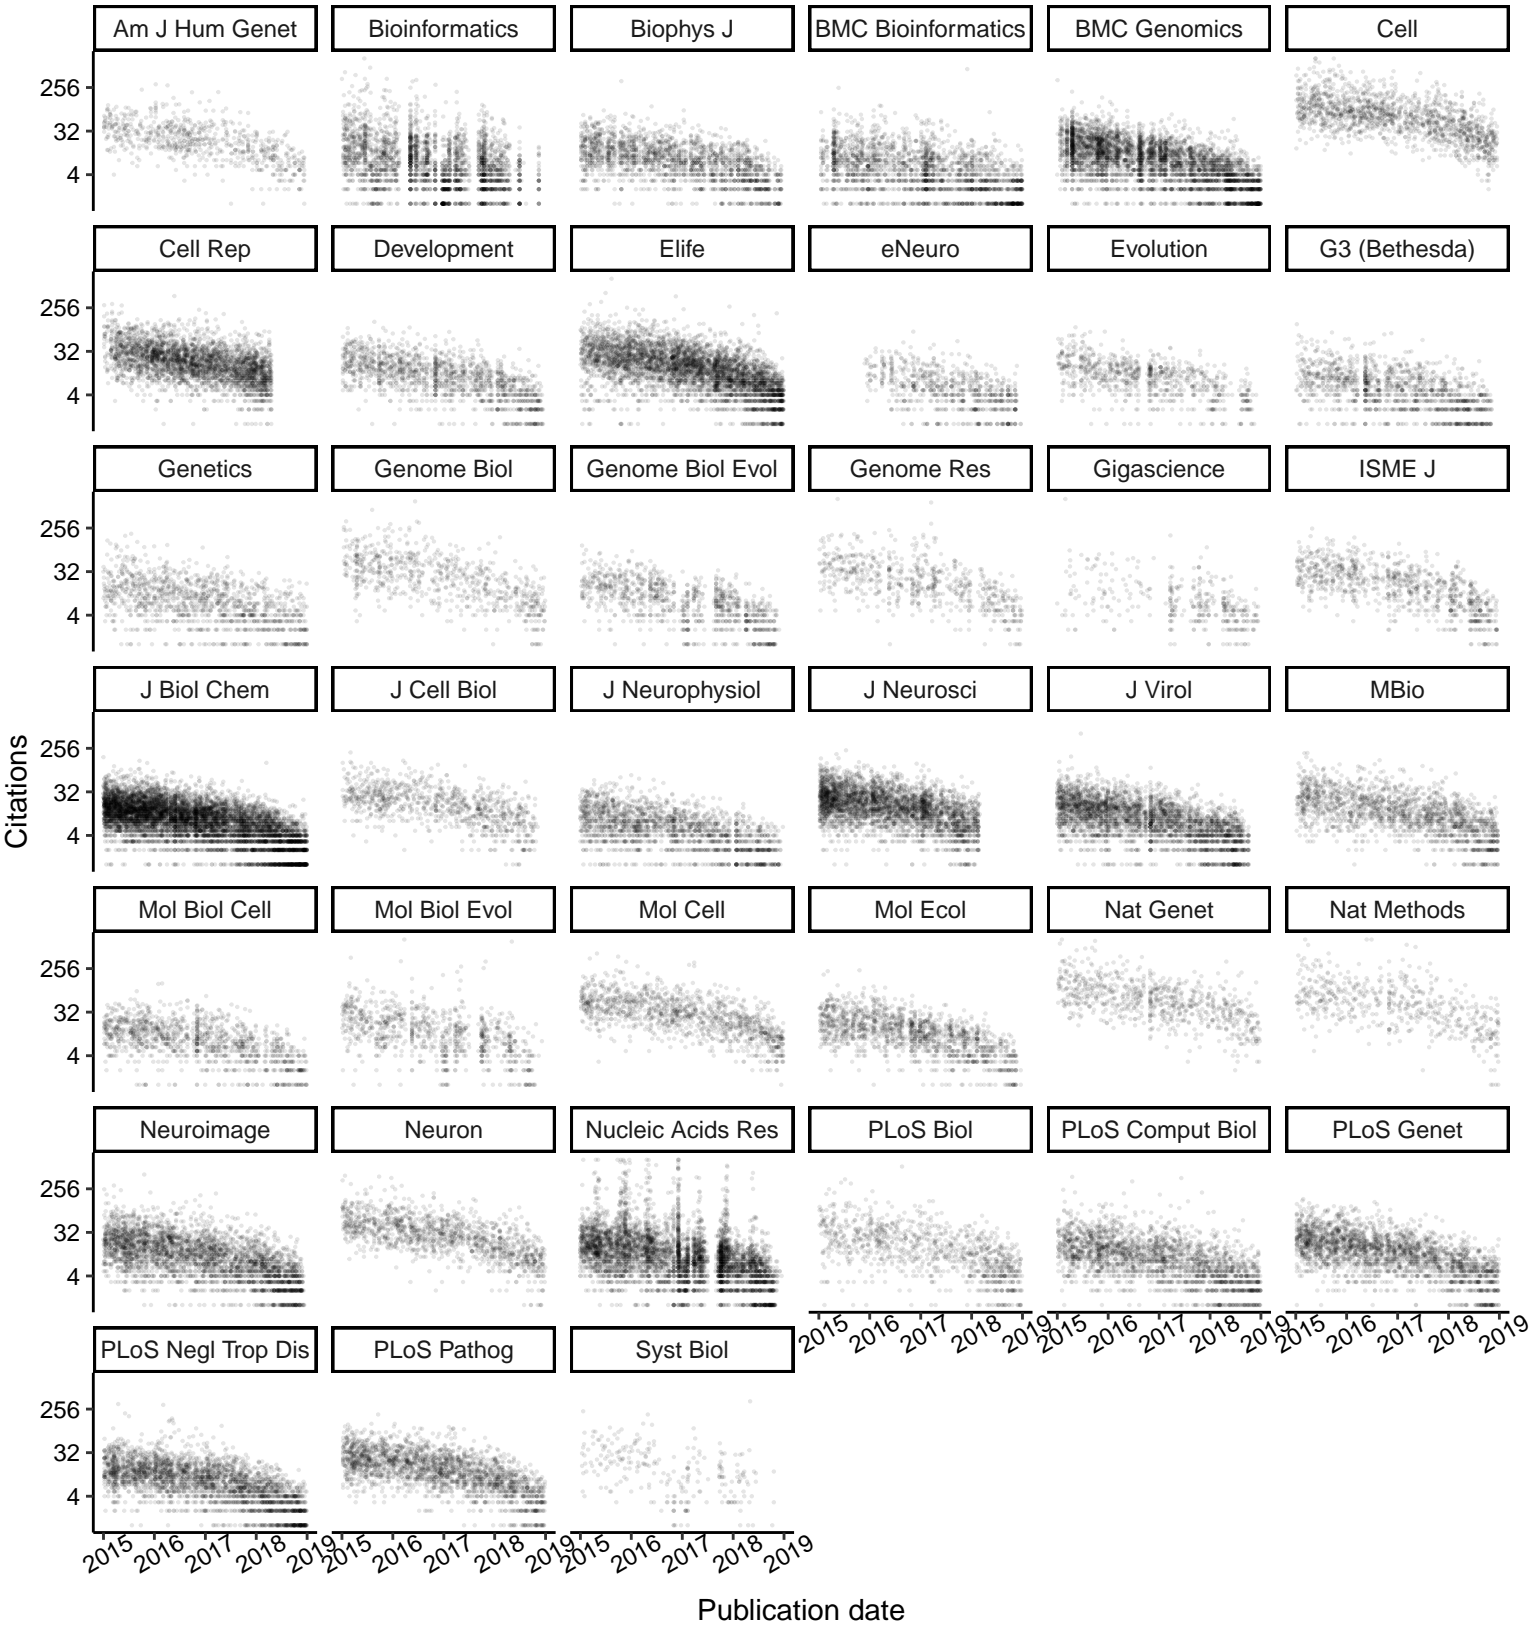

Supplement: supp [file elife-52646-supp-v1.zip › elife_poa_e52646_Figure_1_figure_supplement_4.pdf]

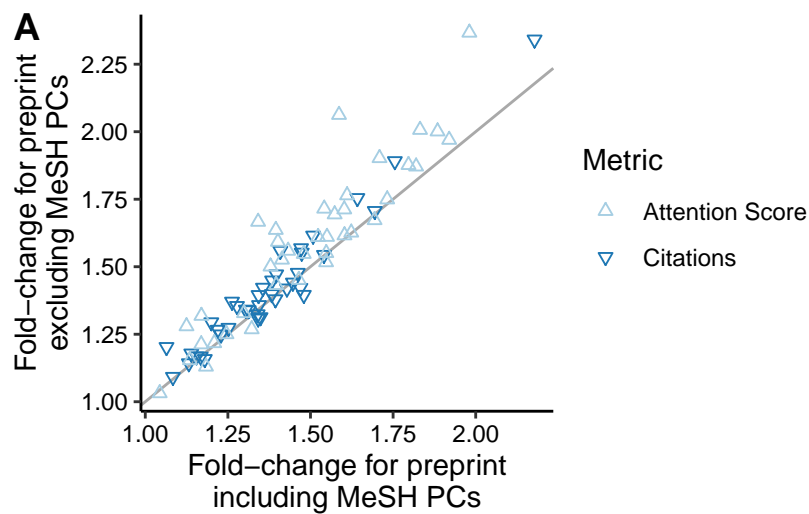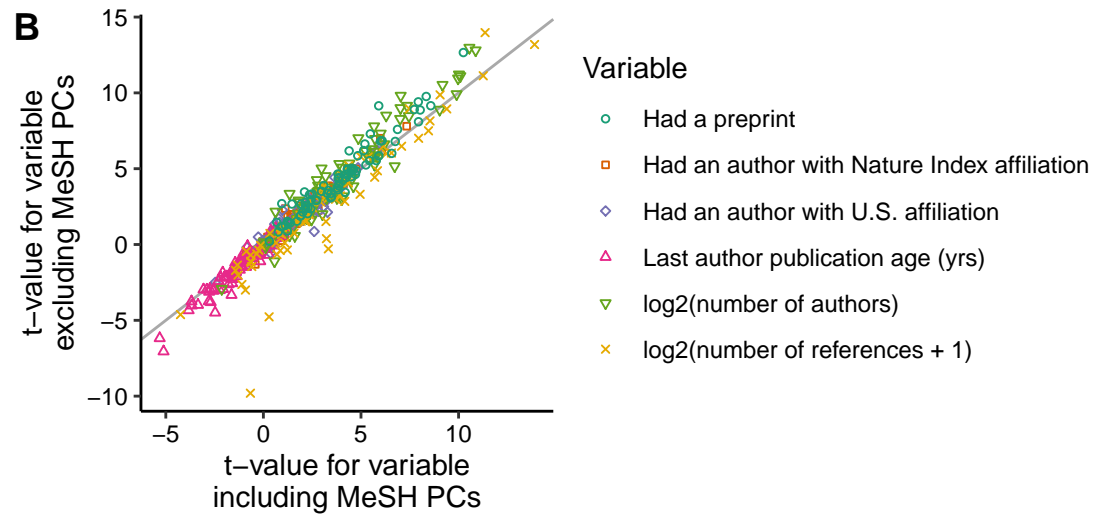

Supplement: supp [file elife-52646-supp-v1.zip › elife_poa_e52646_Figure_2_figure_supplement_2.pdf]
